# Supplementary material for: Benzoazacrown compound: a highly effective chelator for therapeutic bismuth radioisotopes
Source: Royal Society of Chemistry journal article supplement (doi:10.1039/c9md00251k), 2019-01-01
Supplement: c9md00251k1.sdf [file c9md00251k1.sdf]

     RDKit          2D

 20 19  0  0  0  0  0  0  0  0999 V2000
    1.7321    1.0000    0.0000 N   0  0  0  0  0  0  0  0  0  0  0  0
    0.8660    1.5000    0.0000 C   0  0  0  0  0  0  0  0  0  0  0  0
    0.8660    2.5000    0.0000 C   0  0  0  0  0  0  0  0  0  0  0  0
    1.7321    3.0000    0.0000 C   0  0  0  0  0  0  0  0  0  0  0  0
    2.5981    2.5000    0.0000 C   0  0  0  0  0  0  0  0  0  0  0  0
    3.4641    3.0000    0.0000 O   0  0  0  0  0  0  0  0  0  0  0  0
    2.5981    1.5000    0.0000 N   0  0  0  0  0  0  0  0  0  0  0  0
    3.4641    1.0000    0.0000 C   0  0  0  0  0  0  0  0  0  0  0  0
    4.3301    1.5000    0.0000 C   0  0  0  0  0  0  0  0  0  0  0  0
    5.1962    1.0000    0.0000 S   0  0  0  0  0  0  0  0  0  0  0  0
    3.4641    0.0000    0.0000 C   0  0  0  0  0  0  0  0  0  0  0  0
    4.3301   -0.5000    0.0000 O   0  0  0  0  0  0  0  0  0  0  0  0
    2.5981   -0.5000    0.0000 N   0  0  0  0  0  0  0  0  0  0  0  0
    2.5981   -1.5000    0.0000 C   0  0  0  0  0  0  0  0  0  0  0  0
    3.4641   -2.0000    0.0000 C   0  0  0  0  0  0  0  0  0  0  0  0
    4.3301   -1.5000    0.0000 O   0  0  0  0  0  0  0  0  0  0  0  0
    3.4641   -3.0000    0.0000 O   0  0  0  0  0  0  0  0  0  0  0  0
    0.0000    1.0000    0.0000 C   0  0  0  0  0  0  0  0  0  0  0  0
   -0.8660    1.5000    0.0000 O   0  0  0  0  0  0  0  0  0  0  0  0
   -0.0000   -0.0000    0.0000 O   0  0  0  0  0  0  0  0  0  0  0  0
  1  2  1  0
  2  3  1  0
  2 18  1  0
  3  4  1  0
  4  5  1  0
  5  6  2  0
  5  7  1  0
  7  8  1  0
  8  9  1  0
  8 11  1  0
  9 10  1  0
 11 12  2  0
 11 13  1  0
 13 14  1  0
 14 15  1  0
 15 16  2  0
 15 17  1  0
 18 19  2  0
 18 20  1  0
M  END
>  <group_A>  (1) 
1

>  <group_B>  (1) 
0

>  <group_C>  (1) 
1

>  <group_D>  (1) 
0

>  <group_G>  (1) 
1

>  <group_H>  (1) 
0

>  <group_J>  (1) 
0

>  <group_L>  (1) 
0

>  <group_M>  (1) 
0

>  <group_N>  (1) 
0

>  <group_P>  (1) 
0

>  <group_R>  (1) 
0

>  <group_S>  (1) 
1

>  <group_V>  (1) 
1

$$$$

     RDKit          2D

 12 12  0  0  0  0  0  0  0  0999 V2000
    1.0000   -1.0000    0.0000 O   0  0  0  0  0  0  0  0  0  0  0  0
    1.0000   -0.0000    0.0000 S   0  0  0  0  0  0  0  0  0  0  0  0
    2.0000   -0.0000    0.0000 O   0  0  0  0  0  0  0  0  0  0  0  0
    1.0000    1.0000    0.0000 O   0  0  0  0  0  0  0  0  0  0  0  0
    0.0000    0.0000    0.0000 C   0  0  0  0  0  0  0  0  0  0  0  0
   -0.5000    0.8660    0.0000 C   0  0  0  0  0  0  0  0  0  0  0  0
   -1.5000    0.8660    0.0000 N   0  0  0  0  0  0  0  0  0  0  0  0
   -2.0000    0.0000    0.0000 C   0  0  0  0  0  0  0  0  0  0  0  0
   -3.0000    0.0000    0.0000 C   0  0  0  0  0  0  0  0  0  0  0  0
   -3.5000    0.8660    0.0000 O   0  0  0  0  0  0  0  0  0  0  0  0
   -3.0000    1.7321    0.0000 C   0  0  0  0  0  0  0  0  0  0  0  0
   -2.0000    1.7321    0.0000 C   0  0  0  0  0  0  0  0  0  0  0  0
  1  2  2  0
  2  3  2  0
  2  4  1  0
  2  5  1  0
  5  6  1  0
  6  7  1  0
  7  8  1  0
  8  9  1  0
  9 10  1  0
 10 11  1  0
 11 12  1  0
 12  7  1  0
M  CHG  2   4  -1   7   1
M  END
>  <group_A>  (2) 
1

>  <group_B>  (2) 
1

>  <group_C>  (2) 
1

>  <group_D>  (2) 
0

>  <group_G>  (2) 
1

>  <group_H>  (2) 
0

>  <group_J>  (2) 
0

>  <group_L>  (2) 
1

>  <group_M>  (2) 
1

>  <group_N>  (2) 
1

>  <group_P>  (2) 
0

>  <group_R>  (2) 
0

>  <group_S>  (2) 
1

>  <group_V>  (2) 
1

$$$$

     RDKit          2D

 28 30  0  0  0  0  0  0  0  0999 V2000
   -1.0000    0.7321    0.0000 O   0  0  0  0  0  0  0  0  0  0  0  0
   -1.5000    1.5981    0.0000 C   0  0  0  0  0  0  0  0  0  0  0  0
   -1.0000    2.4641    0.0000 O   0  0  0  0  0  0  0  0  0  0  0  0
   -2.5000    1.5981    0.0000 C   0  0  0  0  0  0  0  0  0  0  0  0
   -3.0000    0.7321    0.0000 C   0  0  0  0  0  0  0  0  0  0  0  0
   -4.0000    0.7321    0.0000 C   0  0  0  0  0  0  0  0  0  0  0  0
   -4.5000   -0.1340    0.0000 N   0  0  0  0  0  0  0  0  0  0  0  0
   -4.0000   -1.0000    0.0000 N   0  0  0  0  0  0  0  0  0  0  0  0
   -3.0000   -1.0000    0.0000 C   0  0  0  0  0  0  0  0  0  0  0  0
   -2.5000   -0.1340    0.0000 C   0  0  0  0  0  0  0  0  0  0  0  0
   -1.5000   -0.1340    0.0000 C   0  0  0  0  0  0  0  0  0  0  0  0
   -1.0000   -1.0000    0.0000 C   0  0  0  0  0  0  0  0  0  0  0  0
   -0.0000   -1.0000    0.0000 S   0  0  0  0  0  0  0  0  0  0  0  0
    0.0000   -2.0000    0.0000 O   0  0  0  0  0  0  0  0  0  0  0  0
    1.0000   -1.0000    0.0000 O   0  0  0  0  0  0  0  0  0  0  0  0
   -0.0000   -0.0000    0.0000 N   0  0  0  0  0  0  0  0  0  0  0  0
    0.8660    0.5000    0.0000 C   0  0  0  0  0  0  0  0  0  0  0  0
    0.8660    1.5000    0.0000 C   0  0  0  0  0  0  0  0  0  0  0  0
    1.7321    2.0000    0.0000 C   0  0  0  0  0  0  0  0  0  0  0  0
    2.5981    1.5000    0.0000 C   0  0  0  0  0  0  0  0  0  0  0  0
    2.5981    0.5000    0.0000 C   0  0  0  0  0  0  0  0  0  0  0  0
    1.7321    0.0000    0.0000 N   0  0  0  0  0  0  0  0  0  0  0  0
   -1.5000   -1.8660    0.0000 C   0  0  0  0  0  0  0  0  0  0  0  0
   -2.5000   -1.8660    0.0000 C   0  0  0  0  0  0  0  0  0  0  0  0
   -4.5000    1.5981    0.0000 C   0  0  0  0  0  0  0  0  0  0  0  0
   -4.0000    2.4641    0.0000 C   0  0  0  0  0  0  0  0  0  0  0  0
   -3.0000    2.4641    0.0000 C   0  0  0  0  0  0  0  0  0  0  0  0
   -2.5000    3.3301    0.0000 O   0  0  0  0  0  0  0  0  0  0  0  0
  1  2  2  0
  2  3  1  0
  2  4  1  0
  4  5  2  0
  5  6  1  0
  6  7  1  0
  6 25  2  0
  7  8  2  3
  8  9  1  0
  9 10  2  0
 10 11  1  0
 11 12  2  0
 12 13  1  0
 12 23  1  0
 13 14  2  0
 13 15  2  0
 13 16  1  0
 16 17  1  0
 17 18  2  0
 18 19  1  0
 19 20  2  0
 20 21  1  0
 21 22  2  0
 22 17  1  0
 23 24  2  0
 24  9  1  0
 25 26  1  0
 26 27  2  0
 27 28  1  0
 27  4  1  0
M  END
>  <group_A>  (3) 
1

>  <group_B>  (3) 
0

>  <group_C>  (3) 
0

>  <group_D>  (3) 
0

>  <group_G>  (3) 
0

>  <group_H>  (3) 
0

>  <group_J>  (3) 
0

>  <group_L>  (3) 
0

>  <group_M>  (3) 
0

>  <group_N>  (3) 
0

>  <group_P>  (3) 
0

>  <group_R>  (3) 
0

>  <group_S>  (3) 
0

>  <group_V>  (3) 
0

$$$$

     RDKit          2D

 16 16  0  0  0  0  0  0  0  0999 V2000
   -5.5000   -1.8660    0.0000 C   0  0  0  0  0  0  0  0  0  0  0  0
   -4.5000   -1.8660    0.0000 C   0  0  0  0  0  0  0  0  0  0  0  0
   -4.0000   -1.0000    0.0000 N   0  0  0  0  0  0  0  0  0  0  0  0
   -3.0000   -1.0000    0.0000 C   0  0  0  0  0  0  0  0  0  0  0  0
   -2.5000   -1.8660    0.0000 C   0  0  0  0  0  0  0  0  0  0  0  0
   -1.5000   -1.8660    0.0000 C   0  0  0  0  0  0  0  0  0  0  0  0
   -1.0000   -1.0000    0.0000 O   0  0  0  0  0  0  0  0  0  0  0  0
    0.0000   -1.0000    0.0000 P   0  0  0  0  0  0  0  0  0  0  0  0
    0.0000   -2.0000    0.0000 O   0  0  0  0  0  0  0  0  0  0  0  0
    1.0000   -1.0000    0.0000 O   0  0  0  0  0  0  0  0  0  0  0  0
    0.0000    0.0000    0.0000 O   0  0  0  0  0  0  0  0  0  0  0  0
   -3.0000   -2.7321    0.0000 C   0  0  0  0  0  0  0  0  0  0  0  0
   -2.5000   -3.5981    0.0000 C   0  0  0  0  0  0  0  0  0  0  0  0
   -1.5000   -3.5981    0.0000 O   0  0  0  0  0  0  0  0  0  0  0  0
   -4.0000   -2.7321    0.0000 C   0  0  0  0  0  0  0  0  0  0  0  0
   -4.5000   -3.5981    0.0000 O   0  0  0  0  0  0  0  0  0  0  0  0
  1  2  1  0
  2  3  2  0
  3  4  1  0
  4  5  2  0
  5  6  1  0
  5 12  1  0
  6  7  1  0
  7  8  1  0
  8  9  2  0
  8 10  1  0
  8 11  1  0
 12 13  1  0
 12 15  2  0
 13 14  2  0
 15 16  1  0
 15  2  1  0
M  END
>  <group_A>  (4) 
1

>  <group_B>  (4) 
1

>  <group_C>  (4) 
1

>  <group_D>  (4) 
1

>  <group_G>  (4) 
1

>  <group_H>  (4) 
0

>  <group_J>  (4) 
0

>  <group_L>  (4) 
0

>  <group_M>  (4) 
1

>  <group_N>  (4) 
1

>  <group_P>  (4) 
0

>  <group_R>  (4) 
0

>  <group_S>  (4) 
1

>  <group_V>  (4) 
1

$$$$

     RDKit          2D

 18 19  0  0  0  0  0  0  0  0999 V2000
    1.0000   -1.0000    0.0000 O   0  0  0  0  0  0  0  0  0  0  0  0
    1.0000   -0.0000    0.0000 P   0  0  0  0  0  0  0  0  0  0  0  0
    2.0000   -0.0000    0.0000 O   0  0  0  0  0  0  0  0  0  0  0  0
    1.0000    1.0000    0.0000 O   0  0  0  0  0  0  0  0  0  0  0  0
    0.0000    0.0000    0.0000 O   0  0  0  0  0  0  0  0  0  0  0  0
   -0.5000    0.8660    0.0000 C   0  0  0  0  0  0  0  0  0  0  0  0
   -1.5000    0.8660    0.0000 C   0  0  0  0  0  0  0  0  0  0  0  0
   -2.0000    1.7321    0.0000 C   0  0  0  0  0  0  0  0  0  0  0  0
   -3.0000    1.7321    0.0000 C   0  0  0  0  0  0  0  0  0  0  0  0
   -3.5878    0.9230    0.0000 C   0  0  0  0  0  0  0  0  0  0  0  0
   -4.5388    1.2321    0.0000 N   0  0  0  0  0  0  0  0  0  0  0  0
   -4.5388    2.2321    0.0000 C   0  0  0  0  0  0  0  0  0  0  0  0
   -5.2820    2.9012    0.0000 C   0  0  0  0  0  0  0  0  0  0  0  0
   -5.0741    3.8793    0.0000 C   0  0  0  0  0  0  0  0  0  0  0  0
   -4.1230    4.1883    0.0000 C   0  0  0  0  0  0  0  0  0  0  0  0
   -3.9151    5.1665    0.0000 F   0  0  0  0  0  0  0  0  0  0  0  0
   -3.3799    3.5192    0.0000 C   0  0  0  0  0  0  0  0  0  0  0  0
   -3.5878    2.5411    0.0000 C   0  0  0  0  0  0  0  0  0  0  0  0
  1  2  2  0
  2  3  1  0
  2  4  1  0
  2  5  1  0
  5  6  1  0
  6  7  1  0
  7  8  1  0
  8  9  1  0
  9 10  2  0
 10 11  1  0
 11 12  1  0
 12 13  2  0
 13 14  1  0
 14 15  2  0
 15 16  1  0
 15 17  1  0
 17 18  2  0
 18  9  1  0
 18 12  1  0
M  END
>  <group_A>  (5) 
1

>  <group_B>  (5) 
0

>  <group_C>  (5) 
0

>  <group_D>  (5) 
0

>  <group_G>  (5) 
0

>  <group_H>  (5) 
0

>  <group_J>  (5) 
0

>  <group_L>  (5) 
0

>  <group_M>  (5) 
0

>  <group_N>  (5) 
0

>  <group_P>  (5) 
0

>  <group_R>  (5) 
0

>  <group_S>  (5) 
0

>  <group_V>  (5) 
0

$$$$

     RDKit          2D

  1  0  0  0  0  0  0  0  0  0999 V2000
    1.0000    0.0000    0.0000 Na  0  0  0  0  0 15  0  0  0  0  0  0
M  CHG  1   1   1
M  END
>  <group_A>  (6) 
1

>  <group_B>  (6) 
1

>  <group_C>  (6) 
1

>  <group_D>  (6) 
1

>  <group_G>  (6) 
1

>  <group_H>  (6) 
0

>  <group_J>  (6) 
1

>  <group_L>  (6) 
1

>  <group_M>  (6) 
1

>  <group_N>  (6) 
1

>  <group_P>  (6) 
1

>  <group_R>  (6) 
1

>  <group_S>  (6) 
1

>  <group_V>  (6) 
1

$$$$

     RDKit          2D

 13 12  0  0  0  0  0  0  0  0999 V2000
    0.1340   -3.2321    0.0000 O   0  0  0  0  0  0  0  0  0  0  0  0
    0.6340   -2.3660    0.0000 C   0  0  0  0  0  0  0  0  0  0  0  0
    1.6340   -2.3660    0.0000 O   0  0  0  0  0  0  0  0  0  0  0  0
    0.1340   -1.5000    0.0000 C   0  0  0  0  0  0  0  0  0  0  0  0
   -0.8660   -1.5000    0.0000 C   0  0  0  0  0  0  0  0  0  0  0  0
   -0.8660   -2.5000    0.0000 O   0  0  0  0  0  0  0  0  0  0  0  0
   -1.8660   -1.5000    0.0000 C   0  0  0  0  0  0  0  0  0  0  0  0
   -2.3660   -2.3660    0.0000 C   0  0  0  0  0  0  0  0  0  0  0  0
   -1.8660   -3.2321    0.0000 O   0  0  0  0  0  0  0  0  0  0  0  0
   -3.3660   -2.3660    0.0000 O   0  0  0  0  0  0  0  0  0  0  0  0
   -0.8660   -0.5000    0.0000 C   0  0  0  0  0  0  0  0  0  0  0  0
   -1.7321   -0.0000    0.0000 O   0  0  0  0  0  0  0  0  0  0  0  0
    0.0000    0.0000    0.0000 O   0  0  0  0  0  0  0  0  0  0  0  0
  1  2  2  0
  2  3  1  0
  2  4  1  0
  4  5  1  0
  5  6  1  0
  5  7  1  0
  5 11  1  0
  7  8  1  0
  8  9  2  0
  8 10  1  0
 11 12  2  0
 11 13  1  0
M  END
>  <group_A>  (7) 
1

>  <group_B>  (7) 
1

>  <group_C>  (7) 
1

>  <group_D>  (7) 
1

>  <group_G>  (7) 
1

>  <group_H>  (7) 
0

>  <group_J>  (7) 
0

>  <group_L>  (7) 
1

>  <group_M>  (7) 
1

>  <group_N>  (7) 
1

>  <group_P>  (7) 
0

>  <group_R>  (7) 
0

>  <group_S>  (7) 
1

>  <group_V>  (7) 
1

$$$$

     RDKit          2D

 48 50  0  0  0  0  0  0  0  0999 V2000
   -3.5000   -0.1340    0.0000 C   0  0  0  0  0  0  0  0  0  0  0  0
   -2.5000   -0.1340    0.0000 C   0  0  0  0  0  0  0  0  0  0  0  0
   -2.5000   -1.1340    0.0000 C   0  0  0  0  0  0  0  0  0  0  0  0
   -1.5000   -0.1340    0.0000 C   0  0  0  0  0  0  0  0  0  0  0  0
   -1.0000   -1.0000    0.0000 O   0  0  0  0  0  0  0  0  0  0  0  0
    0.0000   -1.0000    0.0000 P   0  0  0  0  0  0  0  0  0  0  0  0
    0.0000   -2.0000    0.0000 O   0  0  0  0  0  0  0  0  0  0  0  0
    1.0000   -1.0000    0.0000 O   0  0  0  0  0  0  0  0  0  0  0  0
    0.0000    0.0000    0.0000 O   0  0  0  0  0  0  0  0  0  0  0  0
    0.0000    1.0000    0.0000 P   0  0  0  0  0  0  0  0  0  0  0  0
   -1.0000    1.0000    0.0000 O   0  0  0  0  0  0  0  0  0  0  0  0
    0.0000    2.0000    0.0000 O   0  0  0  0  0  0  0  0  0  0  0  0
    1.0000    1.0000    0.0000 O   0  0  0  0  0  0  0  0  0  0  0  0
    1.5000    1.8660    0.0000 C   0  0  0  0  0  0  0  0  0  0  0  0
    1.0000    2.7321    0.0000 C   0  0  0  0  0  0  0  0  0  0  0  0
    0.0055    2.8366    0.0000 O   0  0  0  0  0  0  0  0  0  0  0  0
   -0.2024    3.8147    0.0000 C   0  0  0  0  0  0  0  0  0  0  0  0
   -1.1160    4.2215    0.0000 N   0  0  0  0  0  0  0  0  0  0  0  0
   -1.9820    3.7215    0.0000 C   0  0  0  0  0  0  0  0  0  0  0  0
   -2.7251    4.3906    0.0000 N   0  0  0  0  0  0  0  0  0  0  0  0
   -2.3184    5.3041    0.0000 C   0  0  0  0  0  0  0  0  0  0  0  0
   -2.7251    6.2177    0.0000 C   0  0  0  0  0  0  0  0  0  0  0  0
   -3.7197    6.3222    0.0000 N   0  0  0  0  0  0  0  0  0  0  0  0
   -2.1374    7.0267    0.0000 N   0  0  0  0  0  0  0  0  0  0  0  0
   -1.1428    6.9222    0.0000 C   0  0  0  0  0  0  0  0  0  0  0  0
   -0.7361    6.0086    0.0000 N   0  0  0  0  0  0  0  0  0  0  0  0
   -1.3239    5.1996    0.0000 C   0  0  0  0  0  0  0  0  0  0  0  0
    0.6636    4.3147    0.0000 C   0  0  0  0  0  0  0  0  0  0  0  0
    0.7681    5.3092    0.0000 O   0  0  0  0  0  0  0  0  0  0  0  0
    1.4067    3.6456    0.0000 C   0  0  0  0  0  0  0  0  0  0  0  0
    2.3849    3.8535    0.0000 O   0  0  0  0  0  0  0  0  0  0  0  0
    2.6939    4.8046    0.0000 P   0  0  0  0  0  0  0  0  0  0  0  0
    3.6450    4.4955    0.0000 O   0  0  0  0  0  0  0  0  0  0  0  0
    3.0029    5.7556    0.0000 O   0  0  0  0  0  0  0  0  0  0  0  0
    1.7428    5.1136    0.0000 O   0  0  0  0  0  0  0  0  0  0  0  0
   -2.5000    0.8660    0.0000 C   0  0  0  0  0  0  0  0  0  0  0  0
   -1.6340    1.3660    0.0000 O   0  0  0  0  0  0  0  0  0  0  0  0
   -3.3660    1.3660    0.0000 C   0  0  0  0  0  0  0  0  0  0  0  0
   -3.3660    2.3660    0.0000 O   0  0  0  0  0  0  0  0  0  0  0  0
   -4.2321    0.8660    0.0000 N   0  0  0  0  0  0  0  0  0  0  0  0
   -5.0981    1.3660    0.0000 C   0  0  0  0  0  0  0  0  0  0  0  0
   -5.0981    2.3660    0.0000 C   0  0  0  0  0  0  0  0  0  0  0  0
   -5.9641    2.8660    0.0000 C   0  0  0  0  0  0  0  0  0  0  0  0
   -5.9641    3.8660    0.0000 O   0  0  0  0  0  0  0  0  0  0  0  0
   -6.8301    2.3660    0.0000 N   0  0  0  0  0  0  0  0  0  0  0  0
   -7.6962    2.8660    0.0000 C   0  0  0  0  0  0  0  0  0  0  0  0
   -7.6962    3.8660    0.0000 C   0  0  0  0  0  0  0  0  0  0  0  0
   -8.5622    4.3660    0.0000 S   0  0  0  0  0  0  0  0  0  0  0  0
  1  2  1  0
  2  3  1  0
  2  4  1  0
  2 36  1  0
  4  5  1  0
  5  6  1  0
  6  7  2  0
  6  8  1  0
  6  9  1  0
  9 10  1  0
 10 11  2  0
 10 12  1  0
 10 13  1  0
 13 14  1  0
 14 15  1  0
 15 16  1  0
 16 17  1  0
 17 18  1  0
 17 28  1  0
 18 19  1  0
 19 20  2  0
 20 21  1  0
 21 22  2  0
 22 23  1  0
 22 24  1  0
 24 25  2  0
 25 26  1  0
 26 27  2  0
 27 18  1  0
 27 21  1  0
 28 29  1  0
 28 30  1  0
 30 31  1  0
 30 15  1  0
 31 32  1  0
 32 33  2  0
 32 34  1  0
 32 35  1  0
 36 37  1  0
 36 38  1  0
 38 39  2  0
 38 40  1  0
 40 41  1  0
 41 42  1  0
 42 43  1  0
 43 44  2  0
 43 45  1  0
 45 46  1  0
 46 47  1  0
 47 48  1  0
M  END
>  <group_A>  (8) 
1

>  <group_B>  (8) 
1

>  <group_C>  (8) 
0

>  <group_D>  (8) 
0

>  <group_G>  (8) 
1

>  <group_H>  (8) 
0

>  <group_J>  (8) 
1

>  <group_L>  (8) 
0

>  <group_M>  (8) 
1

>  <group_N>  (8) 
0

>  <group_P>  (8) 
0

>  <group_R>  (8) 
0

>  <group_S>  (8) 
1

>  <group_V>  (8) 
0

$$$$

     RDKit          2D

  1  0  0  0  0  0  0  0  0  0999 V2000
    1.0000    0.0000    0.0000 K   0  0  0  0  0 15  0  0  0  0  0  0
M  CHG  1   1   1
M  END
>  <group_A>  (9) 
1

>  <group_B>  (9) 
1

>  <group_C>  (9) 
1

>  <group_D>  (9) 
1

>  <group_G>  (9) 
1

>  <group_H>  (9) 
0

>  <group_J>  (9) 
1

>  <group_L>  (9) 
1

>  <group_M>  (9) 
1

>  <group_N>  (9) 
1

>  <group_P>  (9) 
0

>  <group_R>  (9) 
1

>  <group_S>  (9) 
1

>  <group_V>  (9) 
1

$$$$

     RDKit          2D

 19 20  0  0  0  0  0  0  0  0999 V2000
   -1.0000   -1.0000    0.0000 O   0  0  0  0  0  0  0  0  0  0  0  0
    0.0000   -1.0000    0.0000 P   0  0  0  0  0  0  0  0  0  0  0  0
    0.0000   -2.0000    0.0000 O   0  0  0  0  0  0  0  0  0  0  0  0
    1.0000   -1.0000    0.0000 O   0  0  0  0  0  0  0  0  0  0  0  0
    0.0000    0.0000    0.0000 O   0  0  0  0  0  0  0  0  0  0  0  0
    0.8660    0.5000    0.0000 C   0  0  0  0  0  0  0  0  0  0  0  0
    0.8660    1.5000    0.0000 C   0  0  0  0  0  0  0  0  0  0  0  0
    1.7321    2.0000    0.0000 O   0  0  0  0  0  0  0  0  0  0  0  0
    0.0000    2.0000    0.0000 C   0  0  0  0  0  0  0  0  0  0  0  0
   -0.0000    3.0000    0.0000 O   0  0  0  0  0  0  0  0  0  0  0  0
   -0.8660    1.5000    0.0000 C   0  0  0  0  0  0  0  0  0  0  0  0
   -0.9706    0.5055    0.0000 C   0  0  0  0  0  0  0  0  0  0  0  0
   -1.9487    0.2976    0.0000 N   0  0  0  0  0  0  0  0  0  0  0  0
   -2.4487    1.1636    0.0000 C   0  0  0  0  0  0  0  0  0  0  0  0
   -3.4268    1.3715    0.0000 C   0  0  0  0  0  0  0  0  0  0  0  0
   -3.7359    2.3226    0.0000 C   0  0  0  0  0  0  0  0  0  0  0  0
   -3.0667    3.0657    0.0000 C   0  0  0  0  0  0  0  0  0  0  0  0
   -2.0886    2.8578    0.0000 C   0  0  0  0  0  0  0  0  0  0  0  0
   -1.7796    1.9067    0.0000 C   0  0  0  0  0  0  0  0  0  0  0  0
  1  2  2  0
  2  3  1  0
  2  4  1  0
  2  5  1  0
  5  6  1  0
  6  7  1  0
  7  8  1  0
  7  9  1  0
  9 10  1  0
  9 11  1  0
 11 12  2  0
 12 13  1  0
 13 14  1  0
 14 15  2  0
 15 16  1  0
 16 17  2  0
 17 18  1  0
 18 19  2  0
 19 11  1  0
 19 14  1  0
M  END
>  <group_A>  (10) 
1

>  <group_B>  (10) 
0

>  <group_C>  (10) 
0

>  <group_D>  (10) 
0

>  <group_G>  (10) 
0

>  <group_H>  (10) 
0

>  <group_J>  (10) 
0

>  <group_L>  (10) 
0

>  <group_M>  (10) 
0

>  <group_N>  (10) 
0

>  <group_P>  (10) 
0

>  <group_R>  (10) 
0

>  <group_S>  (10) 
0

>  <group_V>  (10) 
0

$$$$

     RDKit          2D

  7  6  0  0  0  0  0  0  0  0999 V2000
    1.7321   -1.0000    0.0000 N   0  0  0  0  0  0  0  0  0  0  0  0
    1.7321   -0.0000    0.0000 C   0  0  0  0  0  0  0  0  0  0  0  0
    2.5981    0.5000    0.0000 C   0  0  0  0  0  0  0  0  0  0  0  0
    2.5981    1.5000    0.0000 O   0  0  0  0  0  0  0  0  0  0  0  0
    0.8660    0.5000    0.0000 C   0  0  0  0  0  0  0  0  0  0  0  0
    0.8660    1.5000    0.0000 O   0  0  0  0  0  0  0  0  0  0  0  0
    0.0000    0.0000    0.0000 O   0  0  0  0  0  0  0  0  0  0  0  0
  1  2  1  0
  2  3  1  0
  2  5  1  0
  3  4  1  0
  5  6  2  0
  5  7  1  0
M  END
>  <group_A>  (11) 
1

>  <group_B>  (11) 
1

>  <group_C>  (11) 
1

>  <group_D>  (11) 
0

>  <group_G>  (11) 
1

>  <group_H>  (11) 
0

>  <group_J>  (11) 
0

>  <group_L>  (11) 
0

>  <group_M>  (11) 
0

>  <group_N>  (11) 
0

>  <group_P>  (11) 
0

>  <group_R>  (11) 
0

>  <group_S>  (11) 
1

>  <group_V>  (11) 
1

$$$$

     RDKit          2D

  5  4  0  0  0  0  0  0  0  0999 V2000
    1.0000   -1.0000    0.0000 O   0  0  0  0  0  0  0  0  0  0  0  0
    1.0000    0.0000    0.0000 S   0  0  0  0  0  0  0  0  0  0  0  0
    2.0000    0.0000    0.0000 O   0  0  0  0  0  0  0  0  0  0  0  0
    1.0000    1.0000    0.0000 O   0  0  0  0  0  0  0  0  0  0  0  0
    0.0000    0.0000    0.0000 O   0  0  0  0  0  0  0  0  0  0  0  0
  1  2  2  0
  2  3  2  0
  2  4  1  0
  2  5  1  0
M  CHG  2   4  -1   5  -1
M  END
>  <group_A>  (12) 
1

>  <group_B>  (12) 
1

>  <group_C>  (12) 
1

>  <group_D>  (12) 
1

>  <group_G>  (12) 
1

>  <group_H>  (12) 
1

>  <group_J>  (12) 
1

>  <group_L>  (12) 
1

>  <group_M>  (12) 
1

>  <group_N>  (12) 
1

>  <group_P>  (12) 
1

>  <group_R>  (12) 
1

>  <group_S>  (12) 
1

>  <group_V>  (12) 
1

$$$$

     RDKit          2D

 48 52  0  0  0  0  0  0  0  0999 V2000
   -8.2930   -1.5839    0.0000 N   0  0  0  0  0  0  0  0  0  0  0  0
   -7.4840   -0.9961    0.0000 C   0  0  0  0  0  0  0  0  0  0  0  0
   -7.5885   -0.0015    0.0000 O   0  0  0  0  0  0  0  0  0  0  0  0
   -6.5704   -1.4028    0.0000 C   0  0  0  0  0  0  0  0  0  0  0  0
   -6.4659   -2.3973    0.0000 C   0  0  0  0  0  0  0  0  0  0  0  0
   -5.5523   -2.8041    0.0000 C   0  0  0  0  0  0  0  0  0  0  0  0
   -4.7433   -2.2163    0.0000 C   0  0  0  0  0  0  0  0  0  0  0  0
   -4.8479   -1.2218    0.0000 N   0  0  0  0  0  0  0  0  0  0  0  0
   -4.0388   -0.6340    0.0000 C   0  0  0  0  0  0  0  0  0  0  0  0
   -3.0878   -0.9430    0.0000 O   0  0  0  0  0  0  0  0  0  0  0  0
   -2.5000   -0.1340    0.0000 C   0  0  0  0  0  0  0  0  0  0  0  0
   -1.5000   -0.1340    0.0000 C   0  0  0  0  0  0  0  0  0  0  0  0
   -1.0000   -1.0000    0.0000 O   0  0  0  0  0  0  0  0  0  0  0  0
    0.0000   -1.0000    0.0000 P   0  0  0  0  0  0  0  0  0  0  0  0
    0.0000   -2.0000    0.0000 O   0  0  0  0  0  0  0  0  0  0  0  0
    1.0000   -1.0000    0.0000 O   0  0  0  0  0  0  0  0  0  0  0  0
    0.0000   -0.0000    0.0000 O   0  0  0  0  0  0  0  0  0  0  0  0
    0.0000    1.0000    0.0000 P   0  0  0  0  0  0  0  0  0  0  0  0
   -1.0000    1.0000    0.0000 O   0  0  0  0  0  0  0  0  0  0  0  0
    0.0000    2.0000    0.0000 O   0  0  0  0  0  0  0  0  0  0  0  0
    1.0000    1.0000    0.0000 O   0  0  0  0  0  0  0  0  0  0  0  0
    1.5000    1.8660    0.0000 C   0  0  0  0  0  0  0  0  0  0  0  0
    1.0000    2.7321    0.0000 C   0  0  0  0  0  0  0  0  0  0  0  0
    0.0055    2.8366    0.0000 O   0  0  0  0  0  0  0  0  0  0  0  0
   -0.2024    3.8147    0.0000 C   0  0  0  0  0  0  0  0  0  0  0  0
   -1.1160    4.2215    0.0000 N   0  0  0  0  0  0  0  0  0  0  0  0
   -1.3239    5.1996    0.0000 C   0  0  0  0  0  0  0  0  0  0  0  0
   -2.3184    5.3041    0.0000 N   0  0  0  0  0  0  0  0  0  0  0  0
   -2.7251    4.3906    0.0000 C   0  0  0  0  0  0  0  0  0  0  0  0
   -3.6762    4.0816    0.0000 C   0  0  0  0  0  0  0  0  0  0  0  0
   -4.4194    4.7507    0.0000 N   0  0  0  0  0  0  0  0  0  0  0  0
   -3.8841    3.1034    0.0000 N   0  0  0  0  0  0  0  0  0  0  0  0
   -3.1410    2.4343    0.0000 C   0  0  0  0  0  0  0  0  0  0  0  0
   -2.1899    2.7433    0.0000 N   0  0  0  0  0  0  0  0  0  0  0  0
   -1.9820    3.7215    0.0000 C   0  0  0  0  0  0  0  0  0  0  0  0
    0.6636    4.3147    0.0000 C   0  0  0  0  0  0  0  0  0  0  0  0
    0.7681    5.3092    0.0000 O   0  0  0  0  0  0  0  0  0  0  0  0
   -0.0409    5.8970    0.0000 P   0  0  0  0  0  0  0  0  0  0  0  0
    0.5469    6.7061    0.0000 O   0  0  0  0  0  0  0  0  0  0  0  0
   -0.8499    6.4848    0.0000 O   0  0  0  0  0  0  0  0  0  0  0  0
   -0.6287    5.0880    0.0000 O   0  0  0  0  0  0  0  0  0  0  0  0
    1.4067    3.6456    0.0000 C   0  0  0  0  0  0  0  0  0  0  0  0
    2.3849    3.8535    0.0000 O   0  0  0  0  0  0  0  0  0  0  0  0
   -3.0878    0.6750    0.0000 C   0  0  0  0  0  0  0  0  0  0  0  0
   -2.7788    1.6261    0.0000 O   0  0  0  0  0  0  0  0  0  0  0  0
   -4.0388    0.3660    0.0000 C   0  0  0  0  0  0  0  0  0  0  0  0
   -4.8479    0.9538    0.0000 O   0  0  0  0  0  0  0  0  0  0  0  0
   -5.7614   -0.8150    0.0000 C   0  0  0  0  0  0  0  0  0  0  0  0
  1  2  1  0
  2  3  2  0
  2  4  1  0
  4  5  2  0
  5  6  1  0
  6  7  2  0
  7  8  1  0
  8  9  1  0
  8 48  2  0
  9 10  1  0
 10 11  1  0
 11 12  1  0
 11 44  1  0
 12 13  1  0
 13 14  1  0
 14 15  2  0
 14 16  1  0
 14 17  1  0
 17 18  1  0
 18 19  2  0
 18 20  1  0
 18 21  1  0
 21 22  1  0
 22 23  1  0
 23 24  1  0
 24 25  1  0
 25 26  1  0
 25 36  1  0
 26 27  1  0
 27 28  2  0
 28 29  1  0
 29 30  2  0
 30 31  1  0
 30 32  1  0
 32 33  2  0
 33 34  1  0
 34 35  2  0
 35 26  1  0
 35 29  1  0
 36 37  1  0
 36 42  1  0
 37 38  1  0
 38 39  2  0
 38 40  1  0
 38 41  1  0
 42 43  1  0
 42 23  1  0
 44 45  1  0
 44 46  1  0
 46 47  1  0
 46  9  1  0
 48  4  1  0
M  CHG  2   8   1  16  -1
M  END
>  <group_A>  (13) 
1

>  <group_B>  (13) 
1

>  <group_C>  (13) 
1

>  <group_D>  (13) 
1

>  <group_G>  (13) 
1

>  <group_H>  (13) 
0

>  <group_J>  (13) 
1

>  <group_L>  (13) 
1

>  <group_M>  (13) 
1

>  <group_N>  (13) 
0

>  <group_P>  (13) 
1

>  <group_R>  (13) 
0

>  <group_S>  (13) 
1

>  <group_V>  (13) 
1

$$$$

     RDKit          2D

 24 25  0  0  0  0  0  0  0  0999 V2000
    3.4641    1.0000    0.0000 C   0  0  0  0  0  0  0  0  0  0  0  0
    2.5981    1.5000    0.0000 O   0  0  0  0  0  0  0  0  0  0  0  0
    1.7321    1.0000    0.0000 C   0  0  0  0  0  0  0  0  0  0  0  0
    1.7321    0.0000    0.0000 C   0  0  0  0  0  0  0  0  0  0  0  0
    0.8660   -0.5000    0.0000 C   0  0  0  0  0  0  0  0  0  0  0  0
   -0.0000   -0.0000    0.0000 C   0  0  0  0  0  0  0  0  0  0  0  0
   -0.8660   -0.5000    0.0000 C   0  0  0  0  0  0  0  0  0  0  0  0
   -0.8660   -1.5000    0.0000 C   0  0  0  0  0  0  0  0  0  0  0  0
   -1.7321   -2.0000    0.0000 S   0  0  0  0  0  0  0  0  0  0  0  0
    0.0000   -2.0000    0.0000 N   0  0  0  0  0  0  0  0  0  0  0  0
    0.0000   -3.0000    0.0000 C   0  0  0  0  0  0  0  0  0  0  0  0
    0.8660   -1.5000    0.0000 C   0  0  0  0  0  0  0  0  0  0  0  0
    1.7321   -2.0000    0.0000 C   0  0  0  0  0  0  0  0  0  0  0  0
    1.7321   -3.0000    0.0000 O   0  0  0  0  0  0  0  0  0  0  0  0
    2.5981   -1.5000    0.0000 O   0  0  0  0  0  0  0  0  0  0  0  0
   -1.7321   -0.0000    0.0000 C   0  0  0  0  0  0  0  0  0  0  0  0
   -1.7321    1.0000    0.0000 C   0  0  0  0  0  0  0  0  0  0  0  0
   -0.8660    1.5000    0.0000 C   0  0  0  0  0  0  0  0  0  0  0  0
   -0.0000    1.0000    0.0000 C   0  0  0  0  0  0  0  0  0  0  0  0
    0.8660    1.5000    0.0000 C   0  0  0  0  0  0  0  0  0  0  0  0
    0.8660    2.5000    0.0000 C   0  0  0  0  0  0  0  0  0  0  0  0
    0.3660    3.3660    0.0000 F   0  0  0  0  0  0  0  0  0  0  0  0
   -0.1340    2.5000    0.0000 F   0  0  0  0  0  0  0  0  0  0  0  0
    1.7321    3.0000    0.0000 F   0  0  0  0  0  0  0  0  0  0  0  0
  1  2  1  0
  2  3  1  0
  3  4  2  0
  4  5  1  0
  5  6  2  0
  6  7  1  0
  7  8  1  0
  7 16  2  0
  8  9  2  0
  8 10  1  0
 10 11  1  0
 10 12  1  0
 12 13  1  0
 13 14  2  0
 13 15  1  0
 16 17  1  0
 17 18  2  0
 18 19  1  0
 19 20  2  0
 19  6  1  0
 20 21  1  0
 20  3  1  0
 21 22  1  0
 21 23  1  0
 21 24  1  0
M  END
>  <group_A>  (14) 
1

>  <group_B>  (14) 
0

>  <group_C>  (14) 
0

>  <group_D>  (14) 
0

>  <group_G>  (14) 
0

>  <group_H>  (14) 
0

>  <group_J>  (14) 
0

>  <group_L>  (14) 
0

>  <group_M>  (14) 
0

>  <group_N>  (14) 
0

>  <group_P>  (14) 
0

>  <group_R>  (14) 
0

>  <group_S>  (14) 
0

>  <group_V>  (14) 
0

$$$$

     RDKit          2D

 44 47  0  0  0  0  0  0  0  0999 V2000
   -5.1962    0.0000    0.0000 C   0  0  0  0  0  0  0  0  0  0  0  0
   -5.1962   -1.0000    0.0000 C   0  0  0  0  0  0  0  0  0  0  0  0
   -4.3301   -1.5000    0.0000 O   0  0  0  0  0  0  0  0  0  0  0  0
   -4.3301   -2.5000    0.0000 C   0  0  0  0  0  0  0  0  0  0  0  0
   -3.4641   -3.0000    0.0000 O   0  0  0  0  0  0  0  0  0  0  0  0
   -2.5981   -2.5000    0.0000 C   0  0  0  0  0  0  0  0  0  0  0  0
   -2.5981   -1.5000    0.0000 C   0  0  0  0  0  0  0  0  0  0  0  0
   -3.4641   -1.0000    0.0000 C   0  0  0  0  0  0  0  0  0  0  0  0
   -3.4641    0.0000    0.0000 O   0  0  0  0  0  0  0  0  0  0  0  0
   -1.7321   -1.0000    0.0000 O   0  0  0  0  0  0  0  0  0  0  0  0
   -0.8660   -1.5000    0.0000 C   0  0  0  0  0  0  0  0  0  0  0  0
   -0.0000   -1.0000    0.0000 O   0  0  0  0  0  0  0  0  0  0  0  0
    0.0000   -0.0000    0.0000 C   0  0  0  0  0  0  0  0  0  0  0  0
    0.8660    0.5000    0.0000 C   0  0  0  0  0  0  0  0  0  0  0  0
    1.7321   -0.0000    0.0000 C   0  0  0  0  0  0  0  0  0  0  0  0
    2.5981    0.5000    0.0000 O   0  0  0  0  0  0  0  0  0  0  0  0
    0.8660    1.5000    0.0000 O   0  0  0  0  0  0  0  0  0  0  0  0
    0.0000    2.0000    0.0000 C   0  0  0  0  0  0  0  0  0  0  0  0
    0.0000    3.0000    0.0000 O   0  0  0  0  0  0  0  0  0  0  0  0
   -0.8660    1.5000    0.0000 C   0  0  0  0  0  0  0  0  0  0  0  0
   -1.7321    2.0000    0.0000 O   0  0  0  0  0  0  0  0  0  0  0  0
   -0.8660    0.5000    0.0000 C   0  0  0  0  0  0  0  0  0  0  0  0
   -1.7321    0.0000    0.0000 O   0  0  0  0  0  0  0  0  0  0  0  0
   -0.8660   -2.5000    0.0000 C   0  0  0  0  0  0  0  0  0  0  0  0
   -0.0000   -3.0000    0.0000 O   0  0  0  0  0  0  0  0  0  0  0  0
   -1.7321   -3.0000    0.0000 C   0  0  0  0  0  0  0  0  0  0  0  0
   -1.7321   -4.0000    0.0000 O   0  0  0  0  0  0  0  0  0  0  0  0
   -5.1962   -3.0000    0.0000 C   0  0  0  0  0  0  0  0  0  0  0  0
   -5.1962   -4.0000    0.0000 O   0  0  0  0  0  0  0  0  0  0  0  0
   -6.0622   -2.5000    0.0000 C   0  0  0  0  0  0  0  0  0  0  0  0
   -6.9282   -3.0000    0.0000 O   0  0  0  0  0  0  0  0  0  0  0  0
   -6.0622   -1.5000    0.0000 C   0  0  0  0  0  0  0  0  0  0  0  0
   -6.9282   -1.0000    0.0000 N   0  0  0  0  0  0  0  0  0  0  0  0
   -6.9282    0.0000    0.0000 C   0  0  0  0  0  0  0  0  0  0  0  0
   -6.0622    0.5000    0.0000 C   0  0  0  0  0  0  0  0  0  0  0  0
   -6.0622    1.5000    0.0000 C   0  0  0  0  0  0  0  0  0  0  0  0
   -5.1962    2.0000    0.0000 C   0  0  0  0  0  0  0  0  0  0  0  0
   -5.1962    3.0000    0.0000 O   0  0  0  0  0  0  0  0  0  0  0  0
   -6.9282    2.0000    0.0000 C   0  0  0  0  0  0  0  0  0  0  0  0
   -6.9282    3.0000    0.0000 O   0  0  0  0  0  0  0  0  0  0  0  0
   -7.7942    1.5000    0.0000 C   0  0  0  0  0  0  0  0  0  0  0  0
   -8.6603    2.0000    0.0000 O   0  0  0  0  0  0  0  0  0  0  0  0
   -7.7942    0.5000    0.0000 C   0  0  0  0  0  0  0  0  0  0  0  0
   -8.6603    0.0000    0.0000 O   0  0  0  0  0  0  0  0  0  0  0  0
  1  2  1  0
  2  3  1  0
  3  4  1  0
  4  5  1  0
  4 28  1  0
  5  6  1  0
  6  7  1  0
  7  8  1  0
  7 10  1  0
  8  9  1  0
 10 11  1  0
 11 12  1  0
 11 24  1  0
 12 13  1  0
 13 14  1  0
 14 15  1  0
 14 17  1  0
 15 16  1  0
 17 18  1  0
 18 19  1  0
 18 20  1  0
 20 21  1  0
 20 22  1  0
 22 23  1  0
 22 13  1  0
 24 25  1  0
 24 26  1  0
 26 27  1  0
 26  6  1  0
 28 29  1  0
 28 30  1  0
 30 31  1  0
 30 32  1  0
 32 33  1  0
 32  2  1  0
 33 34  1  0
 34 35  1  0
 35 36  2  0
 36 37  1  0
 36 39  1  0
 37 38  1  0
 39 40  1  0
 39 41  1  0
 41 42  1  0
 41 43  1  0
 43 44  1  0
 43 34  1  0
M  END
>  <group_A>  (15) 
1

>  <group_B>  (15) 
1

>  <group_C>  (15) 
1

>  <group_D>  (15) 
0

>  <group_G>  (15) 
0

>  <group_H>  (15) 
0

>  <group_J>  (15) 
0

>  <group_L>  (15) 
0

>  <group_M>  (15) 
0

>  <group_N>  (15) 
0

>  <group_P>  (15) 
0

>  <group_R>  (15) 
0

>  <group_S>  (15) 
0

>  <group_V>  (15) 
1

$$$$

     RDKit          2D

 12 12  0  0  0  0  0  0  0  0999 V2000
   -0.8660   -1.5000    0.0000 O   0  0  0  0  0  0  0  0  0  0  0  0
    0.0000   -1.0000    0.0000 C   0  0  0  0  0  0  0  0  0  0  0  0
    0.0000    0.0000    0.0000 C   0  0  0  0  0  0  0  0  0  0  0  0
   -0.8660    0.5000    0.0000 O   0  0  0  0  0  0  0  0  0  0  0  0
   -0.8660    1.5000    0.0000 C   0  0  0  0  0  0  0  0  0  0  0  0
   -1.7321    2.0000    0.0000 O   0  0  0  0  0  0  0  0  0  0  0  0
   -0.0000    2.0000    0.0000 C   0  0  0  0  0  0  0  0  0  0  0  0
    0.0000    3.0000    0.0000 O   0  0  0  0  0  0  0  0  0  0  0  0
    0.8660    1.5000    0.0000 C   0  0  0  0  0  0  0  0  0  0  0  0
    1.7321    2.0000    0.0000 O   0  0  0  0  0  0  0  0  0  0  0  0
    0.8660    0.5000    0.0000 C   0  0  0  0  0  0  0  0  0  0  0  0
    1.7321    0.0000    0.0000 O   0  0  0  0  0  0  0  0  0  0  0  0
  1  2  1  0
  2  3  1  0
  3  4  1  0
  4  5  1  0
  5  6  1  0
  5  7  1  0
  7  8  1  0
  7  9  1  0
  9 10  1  0
  9 11  1  0
 11 12  1  0
 11  3  1  0
M  END
>  <group_A>  (16) 
1

>  <group_B>  (16) 
1

>  <group_C>  (16) 
1

>  <group_D>  (16) 
1

>  <group_G>  (16) 
1

>  <group_H>  (16) 
0

>  <group_J>  (16) 
1

>  <group_L>  (16) 
0

>  <group_M>  (16) 
1

>  <group_N>  (16) 
1

>  <group_P>  (16) 
0

>  <group_R>  (16) 
1

>  <group_S>  (16) 
1

>  <group_V>  (16) 
1

$$$$

     RDKit          2D

 12 12  0  0  0  0  0  0  0  0999 V2000
   -0.8660   -1.5000    0.0000 O   0  0  0  0  0  0  0  0  0  0  0  0
    0.0000   -1.0000    0.0000 C   0  0  0  0  0  0  0  0  0  0  0  0
    0.0000    0.0000    0.0000 C   0  0  0  0  0  0  0  0  0  0  0  0
   -0.8660    0.5000    0.0000 O   0  0  0  0  0  0  0  0  0  0  0  0
   -0.8660    1.5000    0.0000 C   0  0  0  0  0  0  0  0  0  0  0  0
   -1.7321    2.0000    0.0000 O   0  0  0  0  0  0  0  0  0  0  0  0
   -0.0000    2.0000    0.0000 C   0  0  0  0  0  0  0  0  0  0  0  0
    0.0000    3.0000    0.0000 O   0  0  0  0  0  0  0  0  0  0  0  0
    0.8660    1.5000    0.0000 C   0  0  0  0  0  0  0  0  0  0  0  0
    1.7321    2.0000    0.0000 O   0  0  0  0  0  0  0  0  0  0  0  0
    0.8660    0.5000    0.0000 C   0  0  0  0  0  0  0  0  0  0  0  0
    1.7321    0.0000    0.0000 O   0  0  0  0  0  0  0  0  0  0  0  0
  1  2  1  0
  2  3  1  0
  3  4  1  0
  4  5  1  0
  5  6  1  0
  5  7  1  0
  7  8  1  0
  7  9  1  0
  9 10  1  0
  9 11  1  0
 11 12  1  0
 11  3  1  0
M  END
>  <group_A>  (17) 
1

>  <group_B>  (17) 
1

>  <group_C>  (17) 
1

>  <group_D>  (17) 
1

>  <group_G>  (17) 
1

>  <group_H>  (17) 
0

>  <group_J>  (17) 
1

>  <group_L>  (17) 
1

>  <group_M>  (17) 
1

>  <group_N>  (17) 
1

>  <group_P>  (17) 
0

>  <group_R>  (17) 
1

>  <group_S>  (17) 
1

>  <group_V>  (17) 
1

$$$$

     RDKit          2D

 15 15  0  0  0  0  0  0  0  0999 V2000
   -1.7321   -1.0000    0.0000 C   0  0  0  0  0  0  0  0  0  0  0  0
   -0.8660   -1.5000    0.0000 C   0  0  0  0  0  0  0  0  0  0  0  0
   -0.8660   -2.5000    0.0000 O   0  0  0  0  0  0  0  0  0  0  0  0
   -0.0000   -1.0000    0.0000 N   0  0  0  0  0  0  0  0  0  0  0  0
    0.0000   -0.0000    0.0000 C   0  0  0  0  0  0  0  0  0  0  0  0
   -0.8660    0.5000    0.0000 C   0  0  0  0  0  0  0  0  0  0  0  0
   -1.7321   -0.0000    0.0000 O   0  0  0  0  0  0  0  0  0  0  0  0
   -0.8660    1.5000    0.0000 O   0  0  0  0  0  0  0  0  0  0  0  0
    0.0000    2.0000    0.0000 C   0  0  0  0  0  0  0  0  0  0  0  0
    0.0000    3.0000    0.0000 C   0  0  0  0  0  0  0  0  0  0  0  0
    0.8660    3.5000    0.0000 O   0  0  0  0  0  0  0  0  0  0  0  0
    0.8660    1.5000    0.0000 C   0  0  0  0  0  0  0  0  0  0  0  0
    1.7321    2.0000    0.0000 O   0  0  0  0  0  0  0  0  0  0  0  0
    0.8660    0.5000    0.0000 C   0  0  0  0  0  0  0  0  0  0  0  0
    1.7321    0.0000    0.0000 O   0  0  0  0  0  0  0  0  0  0  0  0
  1  2  1  0
  2  3  2  0
  2  4  1  0
  4  5  1  0
  5  6  1  0
  6  7  1  0
  6  8  1  0
  8  9  1  0
  9 10  1  0
  9 12  1  0
 10 11  1  0
 12 13  1  0
 12 14  1  0
 14 15  1  0
 14  5  1  0
M  END
>  <group_A>  (18) 
1

>  <group_B>  (18) 
1

>  <group_C>  (18) 
1

>  <group_D>  (18) 
1

>  <group_G>  (18) 
1

>  <group_H>  (18) 
1

>  <group_J>  (18) 
1

>  <group_L>  (18) 
1

>  <group_M>  (18) 
1

>  <group_N>  (18) 
1

>  <group_P>  (18) 
1

>  <group_R>  (18) 
1

>  <group_S>  (18) 
1

>  <group_V>  (18) 
1

$$$$

     RDKit          2D

  5  4  0  0  0  0  0  0  0  0999 V2000
    1.0000   -1.0000    0.0000 F   0  0  0  0  0  0  0  0  0  0  0  0
    1.0000    0.0000    0.0000 Al  0  0  0  0  0  7  0  0  0  0  0  0
    2.0000    0.0000    0.0000 F   0  0  0  0  0  0  0  0  0  0  0  0
    1.0000    1.0000    0.0000 F   0  0  0  0  0  0  0  0  0  0  0  0
    0.0000    0.0000    0.0000 F   0  0  0  0  0  0  0  0  0  0  0  0
  1  2  1  0
  2  3  1  0
  2  4  1  0
  2  5  1  0
M  CHG  1   2  -1
M  END
>  <group_A>  (19) 
1

>  <group_B>  (19) 
0

>  <group_C>  (19) 
0

>  <group_D>  (19) 
0

>  <group_G>  (19) 
0

>  <group_H>  (19) 
0

>  <group_J>  (19) 
0

>  <group_L>  (19) 
1

>  <group_M>  (19) 
0

>  <group_N>  (19) 
0

>  <group_P>  (19) 
0

>  <group_R>  (19) 
0

>  <group_S>  (19) 
0

>  <group_V>  (19) 
0

$$$$

     RDKit          2D

 28 30  0  0  0  0  0  0  0  0999 V2000
   -7.6069   -1.2868    0.0000 N   0  0  0  0  0  0  0  0  0  0  0  0
   -7.2002   -0.3733    0.0000 C   0  0  0  0  0  0  0  0  0  0  0  0
   -6.2057   -0.2688    0.0000 N   0  0  0  0  0  0  0  0  0  0  0  0
   -5.7989    0.6448    0.0000 C   0  0  0  0  0  0  0  0  0  0  0  0
   -6.3867    1.4538    0.0000 C   0  0  0  0  0  0  0  0  0  0  0  0
   -5.7989    2.2628    0.0000 N   0  0  0  0  0  0  0  0  0  0  0  0
   -4.8479    1.9538    0.0000 C   0  0  0  0  0  0  0  0  0  0  0  0
   -4.8479    0.9538    0.0000 N   0  0  0  0  0  0  0  0  0  0  0  0
   -4.0388    0.3660    0.0000 C   0  0  0  0  0  0  0  0  0  0  0  0
   -3.0878    0.6750    0.0000 O   0  0  0  0  0  0  0  0  0  0  0  0
   -2.5000   -0.1340    0.0000 C   0  0  0  0  0  0  0  0  0  0  0  0
   -1.5000   -0.1340    0.0000 C   0  0  0  0  0  0  0  0  0  0  0  0
   -1.0000   -1.0000    0.0000 O   0  0  0  0  0  0  0  0  0  0  0  0
   -0.0000   -1.0000    0.0000 P   0  0  0  0  0  0  0  0  0  0  0  0
    0.0000   -2.0000    0.0000 O   0  0  0  0  0  0  0  0  0  0  0  0
    1.0000   -1.0000    0.0000 O   0  0  0  0  0  0  0  0  0  0  0  0
    0.0000    0.0000    0.0000 O   0  0  0  0  0  0  0  0  0  0  0  0
   -0.0000    1.0000    0.0000 P   0  0  0  0  0  0  0  0  0  0  0  0
    1.0000    1.0000    0.0000 O   0  0  0  0  0  0  0  0  0  0  0  0
   -0.0000    2.0000    0.0000 O   0  0  0  0  0  0  0  0  0  0  0  0
   -1.0000    1.0000    0.0000 O   0  0  0  0  0  0  0  0  0  0  0  0
   -3.0878   -0.9430    0.0000 C   0  0  0  0  0  0  0  0  0  0  0  0
   -2.7788   -1.8940    0.0000 O   0  0  0  0  0  0  0  0  0  0  0  0
   -4.0388   -0.6340    0.0000 C   0  0  0  0  0  0  0  0  0  0  0  0
   -4.8479   -1.2218    0.0000 O   0  0  0  0  0  0  0  0  0  0  0  0
   -7.3812    1.3493    0.0000 C   0  0  0  0  0  0  0  0  0  0  0  0
   -7.9690    2.1583    0.0000 O   0  0  0  0  0  0  0  0  0  0  0  0
   -7.7880    0.4357    0.0000 N   0  0  0  0  0  0  0  0  0  0  0  0
  1  2  1  0
  2  3  2  0
  3  4  1  0
  4  5  2  0
  5  6  1  0
  5 26  1  0
  6  7  2  0
  7  8  1  0
  8  9  1  0
  8  4  1  0
  9 10  1  0
 10 11  1  0
 11 12  1  0
 11 22  1  0
 12 13  1  0
 13 14  1  0
 14 15  2  0
 14 16  1  0
 14 17  1  0
 17 18  1  0
 18 19  2  0
 18 20  1  0
 18 21  1  0
 22 23  1  0
 22 24  1  0
 24 25  1  0
 24  9  1  0
 26 27  2  0
 26 28  1  0
 28  2  1  0
M  END
>  <group_A>  (20) 
1

>  <group_B>  (20) 
1

>  <group_C>  (20) 
1

>  <group_D>  (20) 
1

>  <group_G>  (20) 
1

>  <group_H>  (20) 
0

>  <group_J>  (20) 
1

>  <group_L>  (20) 
1

>  <group_M>  (20) 
1

>  <group_N>  (20) 
0

>  <group_P>  (20) 
0

>  <group_R>  (20) 
0

>  <group_S>  (20) 
1

>  <group_V>  (20) 
1

$$$$

     RDKit          2D

  1  0  0  0  0  0  0  0  0  0999 V2000
    1.0000    0.0000    0.0000 Mg  0  0  0  0  0 15  0  0  0  0  0  0
M  CHG  1   1   2
M  END
>  <group_A>  (21) 
1

>  <group_B>  (21) 
1

>  <group_C>  (21) 
1

>  <group_D>  (21) 
1

>  <group_G>  (21) 
1

>  <group_H>  (21) 
0

>  <group_J>  (21) 
1

>  <group_L>  (21) 
1

>  <group_M>  (21) 
1

>  <group_N>  (21) 
1

>  <group_P>  (21) 
0

>  <group_R>  (21) 
1

>  <group_S>  (21) 
1

>  <group_V>  (21) 
1

$$$$

     RDKit          2D

  9  8  0  0  0  0  0  0  0  0999 V2000
    0.8660   -0.5000    0.0000 C   0  0  0  0  0  0  0  0  0  0  0  0
    1.7321   -0.0000    0.0000 C   0  0  0  0  0  0  0  0  0  0  0  0
    2.5981   -0.5000    0.0000 O   0  0  0  0  0  0  0  0  0  0  0  0
    1.7321    1.0000    0.0000 N   0  0  0  0  0  0  0  0  0  0  0  0
    0.8660    1.5000    0.0000 C   0  0  0  0  0  0  0  0  0  0  0  0
    0.8660    2.5000    0.0000 C   0  0  0  0  0  0  0  0  0  0  0  0
   -0.0000    1.0000    0.0000 C   0  0  0  0  0  0  0  0  0  0  0  0
   -0.8660    1.5000    0.0000 O   0  0  0  0  0  0  0  0  0  0  0  0
    0.0000    0.0000    0.0000 O   0  0  0  0  0  0  0  0  0  0  0  0
  1  2  1  0
  2  3  2  0
  2  4  1  0
  4  5  1  0
  5  6  1  0
  5  7  1  0
  7  8  2  0
  7  9  1  0
M  END
>  <group_A>  (22) 
0

>  <group_B>  (22) 
1

>  <group_C>  (22) 
1

>  <group_D>  (22) 
0

>  <group_G>  (22) 
0

>  <group_H>  (22) 
0

>  <group_J>  (22) 
0

>  <group_L>  (22) 
0

>  <group_M>  (22) 
0

>  <group_N>  (22) 
0

>  <group_P>  (22) 
0

>  <group_R>  (22) 
0

>  <group_S>  (22) 
0

>  <group_V>  (22) 
1

$$$$

     RDKit          2D

  6  5  0  0  0  0  0  0  0  0999 V2000
    2.5981   -1.5000    0.0000 O   0  0  0  0  0  0  0  0  0  0  0  0
    2.5981   -0.5000    0.0000 C   0  0  0  0  0  0  0  0  0  0  0  0
    1.7321   -0.0000    0.0000 C   0  0  0  0  0  0  0  0  0  0  0  0
    1.7321    1.0000    0.0000 O   0  0  0  0  0  0  0  0  0  0  0  0
    0.8660   -0.5000    0.0000 C   0  0  0  0  0  0  0  0  0  0  0  0
    0.0000    0.0000    0.0000 O   0  0  0  0  0  0  0  0  0  0  0  0
  1  2  1  0
  2  3  1  0
  3  4  1  0
  3  5  1  0
  5  6  1  0
M  END
>  <group_A>  (23) 
1

>  <group_B>  (23) 
1

>  <group_C>  (23) 
1

>  <group_D>  (23) 
1

>  <group_G>  (23) 
1

>  <group_H>  (23) 
1

>  <group_J>  (23) 
1

>  <group_L>  (23) 
1

>  <group_M>  (23) 
1

>  <group_N>  (23) 
1

>  <group_P>  (23) 
1

>  <group_R>  (23) 
1

>  <group_S>  (23) 
1

>  <group_V>  (23) 
1

$$$$

     RDKit          2D

 14 15  0  0  0  0  0  0  0  0999 V2000
    1.8781    4.1622    0.0000 O   0  0  0  0  0  0  0  0  0  0  0  0
    0.9000    3.9543    0.0000 C   0  0  0  0  0  0  0  0  0  0  0  0
    0.2308    4.6974    0.0000 O   0  0  0  0  0  0  0  0  0  0  0  0
    0.5909    3.0032    0.0000 C   0  0  0  0  0  0  0  0  0  0  0  0
    1.2601    2.2601    0.0000 C   0  0  0  0  0  0  0  0  0  0  0  0
    0.9511    1.3090    0.0000 C   0  0  0  0  0  0  0  0  0  0  0  0
    1.5388    0.5000    0.0000 C   0  0  0  0  0  0  0  0  0  0  0  0
    0.9511   -0.3090    0.0000 N   0  0  0  0  0  0  0  0  0  0  0  0
    0.0000   -0.0000    0.0000 C   0  0  0  0  0  0  0  0  0  0  0  0
   -0.8660   -0.5000    0.0000 C   0  0  0  0  0  0  0  0  0  0  0  0
   -1.7321    0.0000    0.0000 C   0  0  0  0  0  0  0  0  0  0  0  0
   -1.7321    1.0000    0.0000 C   0  0  0  0  0  0  0  0  0  0  0  0
   -0.8660    1.5000    0.0000 C   0  0  0  0  0  0  0  0  0  0  0  0
    0.0000    1.0000    0.0000 C   0  0  0  0  0  0  0  0  0  0  0  0
  1  2  2  0
  2  3  1  0
  2  4  1  0
  4  5  1  0
  5  6  1  0
  6  7  2  0
  7  8  1  0
  8  9  1  0
  9 10  2  0
 10 11  1  0
 11 12  2  0
 12 13  1  0
 13 14  2  0
 14  6  1  0
 14  9  1  0
M  END
>  <group_A>  (24) 
1

>  <group_B>  (24) 
0

>  <group_C>  (24) 
0

>  <group_D>  (24) 
0

>  <group_G>  (24) 
0

>  <group_H>  (24) 
0

>  <group_J>  (24) 
0

>  <group_L>  (24) 
0

>  <group_M>  (24) 
0

>  <group_N>  (24) 
0

>  <group_P>  (24) 
0

>  <group_R>  (24) 
0

>  <group_S>  (24) 
0

>  <group_V>  (24) 
0

$$$$

     RDKit          2D

 13 13  0  0  0  0  0  0  0  0999 V2000
    2.5981    0.5000    0.0000 N   0  0  0  0  0  0  0  0  0  0  0  0
    1.7321    0.0000    0.0000 C   0  0  0  0  0  0  0  0  0  0  0  0
    0.8660    0.5000    0.0000 C   0  0  0  0  0  0  0  0  0  0  0  0
    0.0000   -0.0000    0.0000 C   0  0  0  0  0  0  0  0  0  0  0  0
    0.0000   -1.0000    0.0000 C   0  0  0  0  0  0  0  0  0  0  0  0
   -0.8660   -1.5000    0.0000 C   0  0  0  0  0  0  0  0  0  0  0  0
   -1.7321   -1.0000    0.0000 C   0  0  0  0  0  0  0  0  0  0  0  0
   -2.5981   -1.5000    0.0000 O   0  0  0  0  0  0  0  0  0  0  0  0
   -1.7321   -0.0000    0.0000 C   0  0  0  0  0  0  0  0  0  0  0  0
   -0.8660    0.5000    0.0000 C   0  0  0  0  0  0  0  0  0  0  0  0
    1.7321   -1.0000    0.0000 C   0  0  0  0  0  0  0  0  0  0  0  0
    0.8660   -1.5000    0.0000 O   0  0  0  0  0  0  0  0  0  0  0  0
    2.5981   -1.5000    0.0000 O   0  0  0  0  0  0  0  0  0  0  0  0
  1  2  1  0
  2  3  1  0
  2 11  1  0
  3  4  1  0
  4  5  2  0
  5  6  1  0
  6  7  2  0
  7  8  1  0
  7  9  1  0
  9 10  2  0
 10  4  1  0
 11 12  2  0
 11 13  1  0
M  END
>  <group_A>  (25) 
1

>  <group_B>  (25) 
1

>  <group_C>  (25) 
0

>  <group_D>  (25) 
0

>  <group_G>  (25) 
0

>  <group_H>  (25) 
0

>  <group_J>  (25) 
0

>  <group_L>  (25) 
0

>  <group_M>  (25) 
0

>  <group_N>  (25) 
1

>  <group_P>  (25) 
0

>  <group_R>  (25) 
0

>  <group_S>  (25) 
0

>  <group_V>  (25) 
0

$$$$

     RDKit          2D

 23 24  0  0  0  0  0  0  0  0999 V2000
   -1.7321    3.0000    0.0000 O   0  0  0  0  0  0  0  0  0  0  0  0
   -2.5981    2.5000    0.0000 C   0  0  0  0  0  0  0  0  0  0  0  0
   -2.5981    1.5000    0.0000 C   0  0  0  0  0  0  0  0  0  0  0  0
   -1.7321    1.0000    0.0000 O   0  0  0  0  0  0  0  0  0  0  0  0
   -1.7321   -0.0000    0.0000 C   0  0  0  0  0  0  0  0  0  0  0  0
   -0.8660   -0.5000    0.0000 O   0  0  0  0  0  0  0  0  0  0  0  0
    0.0000   -0.0000    0.0000 C   0  0  0  0  0  0  0  0  0  0  0  0
    0.8660   -0.5000    0.0000 C   0  0  0  0  0  0  0  0  0  0  0  0
    0.8660   -1.5000    0.0000 C   0  0  0  0  0  0  0  0  0  0  0  0
    1.7321   -2.0000    0.0000 O   0  0  0  0  0  0  0  0  0  0  0  0
    1.7321    0.0000    0.0000 O   0  0  0  0  0  0  0  0  0  0  0  0
    1.7321    1.0000    0.0000 C   0  0  0  0  0  0  0  0  0  0  0  0
    2.5981    1.5000    0.0000 O   0  0  0  0  0  0  0  0  0  0  0  0
    0.8660    1.5000    0.0000 C   0  0  0  0  0  0  0  0  0  0  0  0
    0.8660    2.5000    0.0000 O   0  0  0  0  0  0  0  0  0  0  0  0
    0.0000    1.0000    0.0000 C   0  0  0  0  0  0  0  0  0  0  0  0
   -0.8660    1.5000    0.0000 O   0  0  0  0  0  0  0  0  0  0  0  0
   -2.5981   -0.5000    0.0000 C   0  0  0  0  0  0  0  0  0  0  0  0
   -2.5981   -1.5000    0.0000 O   0  0  0  0  0  0  0  0  0  0  0  0
   -3.4641   -0.0000    0.0000 C   0  0  0  0  0  0  0  0  0  0  0  0
   -4.3301   -0.5000    0.0000 O   0  0  0  0  0  0  0  0  0  0  0  0
   -3.4641    1.0000    0.0000 C   0  0  0  0  0  0  0  0  0  0  0  0
   -4.3301    1.5000    0.0000 O   0  0  0  0  0  0  0  0  0  0  0  0
  1  2  1  0
  2  3  1  0
  3  4  1  0
  4  5  1  0
  5  6  1  0
  5 18  1  0
  6  7  1  0
  7  8  1  0
  8  9  1  0
  8 11  1  0
  9 10  1  0
 11 12  1  0
 12 13  1  0
 12 14  1  0
 14 15  1  0
 14 16  1  0
 16 17  1  0
 16  7  1  0
 18 19  1  0
 18 20  1  0
 20 21  1  0
 20 22  1  0
 22 23  1  0
 22  3  1  0
M  END
>  <group_A>  (26) 
1

>  <group_B>  (26) 
1

>  <group_C>  (26) 
1

>  <group_D>  (26) 
0

>  <group_G>  (26) 
1

>  <group_H>  (26) 
0

>  <group_J>  (26) 
0

>  <group_L>  (26) 
0

>  <group_M>  (26) 
0

>  <group_N>  (26) 
1

>  <group_P>  (26) 
0

>  <group_R>  (26) 
0

>  <group_S>  (26) 
1

>  <group_V>  (26) 
1

$$$$

     RDKit          2D

 11 11  0  0  0  0  0  0  0  0999 V2000
    2.5981   -1.5000    0.0000 O   0  0  0  0  0  0  0  0  0  0  0  0
    2.5981   -0.5000    0.0000 C   0  0  0  0  0  0  0  0  0  0  0  0
    3.4641   -0.0000    0.0000 O   0  0  0  0  0  0  0  0  0  0  0  0
    1.7321   -0.0000    0.0000 C   0  0  0  0  0  0  0  0  0  0  0  0
    0.8660   -0.5000    0.0000 C   0  0  0  0  0  0  0  0  0  0  0  0
    0.0000    0.0000    0.0000 C   0  0  0  0  0  0  0  0  0  0  0  0
   -0.8660   -0.5000    0.0000 C   0  0  0  0  0  0  0  0  0  0  0  0
   -1.7321    0.0000    0.0000 C   0  0  0  0  0  0  0  0  0  0  0  0
   -1.7321    1.0000    0.0000 C   0  0  0  0  0  0  0  0  0  0  0  0
   -0.8660    1.5000    0.0000 C   0  0  0  0  0  0  0  0  0  0  0  0
    0.0000    1.0000    0.0000 C   0  0  0  0  0  0  0  0  0  0  0  0
  1  2  2  0
  2  3  1  0
  2  4  1  0
  4  5  1  0
  5  6  1  0
  6  7  2  0
  7  8  1  0
  8  9  2  0
  9 10  1  0
 10 11  2  0
 11  6  1  0
M  END
>  <group_A>  (27) 
1

>  <group_B>  (27) 
0

>  <group_C>  (27) 
0

>  <group_D>  (27) 
0

>  <group_G>  (27) 
0

>  <group_H>  (27) 
0

>  <group_J>  (27) 
0

>  <group_L>  (27) 
0

>  <group_M>  (27) 
0

>  <group_N>  (27) 
0

>  <group_P>  (27) 
0

>  <group_R>  (27) 
0

>  <group_S>  (27) 
0

>  <group_V>  (27) 
0

$$$$

     RDKit          2D

  8  7  0  0  0  0  0  0  0  0999 V2000
    3.4641   -1.0000    0.0000 O   0  0  0  0  0  0  0  0  0  0  0  0
    3.4641    0.0000    0.0000 C   0  0  0  0  0  0  0  0  0  0  0  0
    4.3301    0.5000    0.0000 O   0  0  0  0  0  0  0  0  0  0  0  0
    2.5981    0.5000    0.0000 C   0  0  0  0  0  0  0  0  0  0  0  0
    1.7321    0.0000    0.0000 C   0  0  0  0  0  0  0  0  0  0  0  0
    0.8660    0.5000    0.0000 C   0  0  0  0  0  0  0  0  0  0  0  0
    0.8660    1.5000    0.0000 O   0  0  0  0  0  0  0  0  0  0  0  0
   -0.0000   -0.0000    0.0000 O   0  0  0  0  0  0  0  0  0  0  0  0
  1  2  2  0
  2  3  1  0
  2  4  1  0
  4  5  2  3
  5  6  1  0
  6  7  2  0
  6  8  1  0
M  END
>  <group_A>  (28) 
1

>  <group_B>  (28) 
0

>  <group_C>  (28) 
0

>  <group_D>  (28) 
0

>  <group_G>  (28) 
0

>  <group_H>  (28) 
0

>  <group_J>  (28) 
0

>  <group_L>  (28) 
0

>  <group_M>  (28) 
0

>  <group_N>  (28) 
0

>  <group_P>  (28) 
0

>  <group_R>  (28) 
0

>  <group_S>  (28) 
0

>  <group_V>  (28) 
0

$$$$

     RDKit          2D

  5  4  0  0  0  0  0  0  0  0999 V2000
    1.0000   -1.0000    0.0000 O   0  0  0  0  0  0  0  0  0  0  0  0
    1.0000    0.0000    0.0000 P   0  0  0  0  0  0  0  0  0  0  0  0
    2.0000    0.0000    0.0000 O   0  0  0  0  0  0  0  0  0  0  0  0
    1.0000    1.0000    0.0000 O   0  0  0  0  0  0  0  0  0  0  0  0
    0.0000    0.0000    0.0000 O   0  0  0  0  0  0  0  0  0  0  0  0
  1  2  2  0
  2  3  1  0
  2  4  1  0
  2  5  1  0
M  CHG  3   3  -1   4  -1   5  -1
M  END
>  <group_A>  (29) 
1

>  <group_B>  (29) 
1

>  <group_C>  (29) 
1

>  <group_D>  (29) 
1

>  <group_G>  (29) 
1

>  <group_H>  (29) 
0

>  <group_J>  (29) 
1

>  <group_L>  (29) 
1

>  <group_M>  (29) 
1

>  <group_N>  (29) 
1

>  <group_P>  (29) 
1

>  <group_R>  (29) 
1

>  <group_S>  (29) 
1

>  <group_V>  (29) 
1

$$$$

     RDKit          2D

  1  0  0  0  0  0  0  0  0  0999 V2000
    1.0000    0.0000    0.0000 Cd  0  0  0  0  0 15  0  0  0  0  0  0
M  CHG  1   1   2
M  END
>  <group_A>  (30) 
1

>  <group_B>  (30) 
1

>  <group_C>  (30) 
1

>  <group_D>  (30) 
1

>  <group_G>  (30) 
1

>  <group_H>  (30) 
0

>  <group_J>  (30) 
1

>  <group_L>  (30) 
0

>  <group_M>  (30) 
1

>  <group_N>  (30) 
1

>  <group_P>  (30) 
0

>  <group_R>  (30) 
1

>  <group_S>  (30) 
1

>  <group_V>  (30) 
1

$$$$

     RDKit          2D

 21 21  0  0  0  0  0  0  0  0999 V2000
    0.0000   -3.0000    0.0000 C   0  0  0  0  0  0  0  0  0  0  0  0
   -0.8660   -2.5000    0.0000 C   0  0  0  0  0  0  0  0  0  0  0  0
   -0.8660   -1.5000    0.0000 C   0  0  0  0  0  0  0  0  0  0  0  0
    0.0000   -1.0000    0.0000 C   0  0  0  0  0  0  0  0  0  0  0  0
   -0.0000   -0.0000    0.0000 C   0  0  0  0  0  0  0  0  0  0  0  0
   -0.8660    0.5000    0.0000 C   0  0  0  0  0  0  0  0  0  0  0  0
   -1.7321   -0.0000    0.0000 C   0  0  0  0  0  0  0  0  0  0  0  0
   -0.8660    1.5000    0.0000 C   0  0  0  0  0  0  0  0  0  0  0  0
   -0.0000    2.0000    0.0000 C   0  0  0  0  0  0  0  0  0  0  0  0
    0.8660    1.5000    0.0000 C   0  0  0  0  0  0  0  0  0  0  0  0
    0.8660    0.5000    0.0000 C   0  0  0  0  0  0  0  0  0  0  0  0
    1.3660   -0.3660    0.0000 C   0  0  0  0  0  0  0  0  0  0  0  0
    1.8660    0.5000    0.0000 C   0  0  0  0  0  0  0  0  0  0  0  0
   -1.7321   -3.0000    0.0000 C   0  0  0  0  0  0  0  0  0  0  0  0
   -1.7321   -4.0000    0.0000 C   0  0  0  0  0  0  0  0  0  0  0  0
   -2.5981   -4.5000    0.0000 C   0  0  0  0  0  0  0  0  0  0  0  0
   -2.5981   -5.5000    0.0000 C   0  0  0  0  0  0  0  0  0  0  0  0
   -3.4641   -6.0000    0.0000 C   0  0  0  0  0  0  0  0  0  0  0  0
   -1.7321   -6.0000    0.0000 C   0  0  0  0  0  0  0  0  0  0  0  0
   -1.7321   -7.0000    0.0000 C   0  0  0  0  0  0  0  0  0  0  0  0
   -2.5981   -7.5000    0.0000 O   0  0  0  0  0  0  0  0  0  0  0  0
  1  2  1  0
  2  3  1  0
  2 14  2  3
  3  4  2  3
  4  5  1  0
  5  6  2  0
  6  7  1  0
  6  8  1  0
  8  9  1  0
  9 10  1  0
 10 11  1  0
 11 12  1  0
 11 13  1  0
 11  5  1  0
 14 15  1  0
 15 16  2  3
 16 17  1  0
 17 18  1  0
 17 19  2  3
 19 20  1  0
 20 21  1  0
M  END
>  <group_A>  (31) 
1

>  <group_B>  (31) 
0

>  <group_C>  (31) 
0

>  <group_D>  (31) 
1

>  <group_G>  (31) 
1

>  <group_H>  (31) 
0

>  <group_J>  (31) 
0

>  <group_L>  (31) 
0

>  <group_M>  (31) 
0

>  <group_N>  (31) 
0

>  <group_P>  (31) 
0

>  <group_R>  (31) 
1

>  <group_S>  (31) 
1

>  <group_V>  (31) 
0

$$$$

     RDKit          2D

 16 17  0  0  0  0  0  0  0  0999 V2000
    3.8300   -3.3033    0.0000 O   0  0  0  0  0  0  0  0  0  0  0  0
    2.8738   -3.3062    0.0000 C   0  0  0  0  0  0  0  0  0  0  0  0
    2.3931   -2.4796    0.0000 O   0  0  0  0  0  0  0  0  0  0  0  0
    2.3983   -4.1358    0.0000 C   0  0  0  0  0  0  0  0  0  0  0  0
    1.4420   -4.1388    0.0000 C   0  0  0  0  0  0  0  0  0  0  0  0
    0.9614   -3.3121    0.0000 C   0  0  0  0  0  0  0  0  0  0  0  0
    1.4369   -2.4825    0.0000 C   0  0  0  0  0  0  0  0  0  0  0  0
    0.9562   -1.6559    0.0000 C   0  0  0  0  0  0  0  0  0  0  0  0
    1.4346   -0.8153    0.0000 S   0  0  0  0  0  0  0  0  0  0  0  0
    0.9562   -0.0000    0.0000 C   0  0  0  0  0  0  0  0  0  0  0  0
    0.0000    0.0000    0.0000 C   0  0  0  0  0  0  0  0  0  0  0  0
   -0.9565   -0.0000    0.0000 N   0  0  0  0  0  0  0  0  0  0  0  0
   -1.4349   -0.8406    0.0000 C   0  0  0  0  0  0  0  0  0  0  0  0
   -2.4349   -0.8437    0.0000 O   0  0  0  0  0  0  0  0  0  0  0  0
   -0.9565   -1.6559    0.0000 N   0  0  0  0  0  0  0  0  0  0  0  0
   -0.0000   -1.6559    0.0000 C   0  0  0  0  0  0  0  0  0  0  0  0
  1  2  2  0
  2  3  1  0
  2  4  1  0
  4  5  1  0
  5  6  1  0
  6  7  1  0
  7  8  1  0
  8  9  1  0
  9 10  1  0
 10 11  1  0
 11 12  1  0
 12 13  1  0
 13 14  2  0
 13 15  1  0
 15 16  1  0
 16  8  1  0
 16 11  1  0
M  END
>  <group_A>  (32) 
1

>  <group_B>  (32) 
0

>  <group_C>  (32) 
1

>  <group_D>  (32) 
0

>  <group_G>  (32) 
1

>  <group_H>  (32) 
0

>  <group_J>  (32) 
0

>  <group_L>  (32) 
0

>  <group_M>  (32) 
0

>  <group_N>  (32) 
0

>  <group_P>  (32) 
0

>  <group_R>  (32) 
0

>  <group_S>  (32) 
1

>  <group_V>  (32) 
0

$$$$

     RDKit          2D

  4  4  0  0  0  0  0  0  0  0999 V2000
    1.0000   -0.0000    0.0000 S   0  0  0  0  0  0  0  0  0  0  0  0
   -0.0000   -0.0000    0.0000 Fe  0  0  0  0  0  2  0  0  0  0  0  0
   -0.0000    1.0000    0.0000 S   0  0  0  0  0  0  0  0  0  0  0  0
    1.0000    1.0000    0.0000 Fe  0  0  0  0  0  2  0  0  0  0  0  0
  1  2  1  0
  2  3  1  0
  3  4  1  0
  4  1  1  0
M  END
>  <group_A>  (33) 
1

>  <group_B>  (33) 
0

>  <group_C>  (33) 
0

>  <group_D>  (33) 
1

>  <group_G>  (33) 
1

>  <group_H>  (33) 
0

>  <group_J>  (33) 
0

>  <group_L>  (33) 
0

>  <group_M>  (33) 
0

>  <group_N>  (33) 
1

>  <group_P>  (33) 
0

>  <group_R>  (33) 
0

>  <group_S>  (33) 
1

>  <group_V>  (33) 
1

$$$$

     RDKit          2D

  9  9  0  0  0  0  0  0  0  0999 V2000
    0.0000    1.0000    0.0000 O   0  0  0  0  0  0  0  0  0  0  0  0
    0.0000   -0.0000    0.0000 C   0  0  0  0  0  0  0  0  0  0  0  0
    0.8090   -0.5878    0.0000 C   0  0  0  0  0  0  0  0  0  0  0  0
    0.5000   -1.5388    0.0000 C   0  0  0  0  0  0  0  0  0  0  0  0
   -0.5000   -1.5388    0.0000 C   0  0  0  0  0  0  0  0  0  0  0  0
   -1.0878   -2.3479    0.0000 C   0  0  0  0  0  0  0  0  0  0  0  0
   -2.0823   -2.2433    0.0000 O   0  0  0  0  0  0  0  0  0  0  0  0
   -0.6810   -3.2614    0.0000 O   0  0  0  0  0  0  0  0  0  0  0  0
   -0.8090   -0.5878    0.0000 N   0  0  0  0  0  0  0  0  0  0  0  0
  1  2  2  0
  2  3  1  0
  3  4  1  0
  4  5  1  0
  5  6  1  0
  5  9  1  0
  6  7  2  0
  6  8  1  0
  9  2  1  0
M  END
>  <group_A>  (34) 
1

>  <group_B>  (34) 
1

>  <group_C>  (34) 
1

>  <group_D>  (34) 
1

>  <group_G>  (34) 
1

>  <group_H>  (34) 
0

>  <group_J>  (34) 
0

>  <group_L>  (34) 
0

>  <group_M>  (34) 
1

>  <group_N>  (34) 
1

>  <group_P>  (34) 
0

>  <group_R>  (34) 
1

>  <group_S>  (34) 
1

>  <group_V>  (34) 
1

$$$$

     RDKit          2D

 23 25  0  0  0  0  0  0  0  0999 V2000
   -7.9690    2.1583    0.0000 O   0  0  0  0  0  0  0  0  0  0  0  0
   -7.3812    1.3493    0.0000 C   0  0  0  0  0  0  0  0  0  0  0  0
   -7.7880    0.4357    0.0000 N   0  0  0  0  0  0  0  0  0  0  0  0
   -7.2002   -0.3733    0.0000 C   0  0  0  0  0  0  0  0  0  0  0  0
   -6.2057   -0.2688    0.0000 N   0  0  0  0  0  0  0  0  0  0  0  0
   -5.7989    0.6448    0.0000 C   0  0  0  0  0  0  0  0  0  0  0  0
   -6.3867    1.4538    0.0000 C   0  0  0  0  0  0  0  0  0  0  0  0
   -5.7989    2.2628    0.0000 N   0  0  0  0  0  0  0  0  0  0  0  0
   -4.8479    1.9538    0.0000 C   0  0  0  0  0  0  0  0  0  0  0  0
   -4.8479    0.9538    0.0000 N   0  0  0  0  0  0  0  0  0  0  0  0
   -4.0388    0.3660    0.0000 C   0  0  0  0  0  0  0  0  0  0  0  0
   -3.0878    0.6750    0.0000 O   0  0  0  0  0  0  0  0  0  0  0  0
   -2.5000   -0.1340    0.0000 C   0  0  0  0  0  0  0  0  0  0  0  0
   -1.5000   -0.1340    0.0000 C   0  0  0  0  0  0  0  0  0  0  0  0
   -1.0000   -1.0000    0.0000 O   0  0  0  0  0  0  0  0  0  0  0  0
    0.0000   -1.0000    0.0000 P   0  0  0  0  0  0  0  0  0  0  0  0
    0.0000   -2.0000    0.0000 O   0  0  0  0  0  0  0  0  0  0  0  0
    1.0000   -1.0000    0.0000 O   0  0  0  0  0  0  0  0  0  0  0  0
    0.0000    0.0000    0.0000 O   0  0  0  0  0  0  0  0  0  0  0  0
   -3.0878   -0.9430    0.0000 C   0  0  0  0  0  0  0  0  0  0  0  0
   -2.7788   -1.8940    0.0000 O   0  0  0  0  0  0  0  0  0  0  0  0
   -4.0388   -0.6340    0.0000 C   0  0  0  0  0  0  0  0  0  0  0  0
   -4.8479   -1.2218    0.0000 O   0  0  0  0  0  0  0  0  0  0  0  0
  1  2  2  0
  2  3  1  0
  3  4  1  0
  4  5  2  0
  5  6  1  0
  6  7  2  0
  7  8  1  0
  7  2  1  0
  8  9  2  0
  9 10  1  0
 10 11  1  0
 10  6  1  0
 11 12  1  0
 12 13  1  0
 13 14  1  0
 13 20  1  0
 14 15  1  0
 15 16  1  0
 16 17  2  0
 16 18  1  0
 16 19  1  0
 20 21  1  0
 20 22  1  0
 22 23  1  0
 22 11  1  0
M  END
>  <group_A>  (35) 
1

>  <group_B>  (35) 
1

>  <group_C>  (35) 
1

>  <group_D>  (35) 
0

>  <group_G>  (35) 
1

>  <group_H>  (35) 
0

>  <group_J>  (35) 
0

>  <group_L>  (35) 
1

>  <group_M>  (35) 
0

>  <group_N>  (35) 
0

>  <group_P>  (35) 
0

>  <group_R>  (35) 
0

>  <group_S>  (35) 
1

>  <group_V>  (35) 
1

$$$$

     RDKit          2D

  1  0  0  0  0  0  0  0  0  0999 V2000
    1.0000    0.0000    0.0000 Zn  0  0  0  0  0 15  0  0  0  0  0  0
M  CHG  1   1   2
M  END
>  <group_A>  (36) 
1

>  <group_B>  (36) 
1

>  <group_C>  (36) 
1

>  <group_D>  (36) 
1

>  <group_G>  (36) 
1

>  <group_H>  (36) 
0

>  <group_J>  (36) 
1

>  <group_L>  (36) 
1

>  <group_M>  (36) 
1

>  <group_N>  (36) 
1

>  <group_P>  (36) 
1

>  <group_R>  (36) 
1

>  <group_S>  (36) 
1

>  <group_V>  (36) 
1

$$$$

     RDKit          2D

  1  0  0  0  0  0  0  0  0  0999 V2000
    1.0000    0.0000    0.0000 Cl  0  0  0  0  0  0  0  0  0  0  0  0
M  CHG  1   1  -1
M  END
>  <group_A>  (37) 
1

>  <group_B>  (37) 
1

>  <group_C>  (37) 
1

>  <group_D>  (37) 
1

>  <group_G>  (37) 
1

>  <group_H>  (37) 
0

>  <group_J>  (37) 
1

>  <group_L>  (37) 
1

>  <group_M>  (37) 
1

>  <group_N>  (37) 
1

>  <group_P>  (37) 
0

>  <group_R>  (37) 
1

>  <group_S>  (37) 
1

>  <group_V>  (37) 
1

$$$$

     RDKit          2D

 14 14  0  0  0  0  0  0  0  0999 V2000
    0.5878   -0.8090    0.0000 C   0  0  0  0  0  0  0  0  0  0  0  0
   -0.0000   -0.0000    0.0000 C   0  0  0  0  0  0  0  0  0  0  0  0
   -1.0000   -0.0000    0.0000 N   0  0  0  0  0  0  0  0  0  0  0  0
   -1.3090    0.9511    0.0000 C   0  0  0  0  0  0  0  0  0  0  0  0
   -2.2601    1.2601    0.0000 C   0  0  0  0  0  0  0  0  0  0  0  0
   -2.4680    2.2382    0.0000 C   0  0  0  0  0  0  0  0  0  0  0  0
   -3.0032    0.5909    0.0000 N   0  0  0  0  0  0  0  0  0  0  0  0
   -0.5000    1.5388    0.0000 N   0  0  0  0  0  0  0  0  0  0  0  0
   -0.5000    2.5388    0.0000 C   0  0  0  0  0  0  0  0  0  0  0  0
    0.3660    3.0388    0.0000 C   0  0  0  0  0  0  0  0  0  0  0  0
    1.2321    2.5388    0.0000 O   0  0  0  0  0  0  0  0  0  0  0  0
    0.3660    4.0388    0.0000 O   0  0  0  0  0  0  0  0  0  0  0  0
    0.3090    0.9511    0.0000 C   0  0  0  0  0  0  0  0  0  0  0  0
    1.2601    1.2601    0.0000 O   0  0  0  0  0  0  0  0  0  0  0  0
  1  2  2  0
  2  3  1  0
  3  4  2  0
  4  5  1  0
  4  8  1  0
  5  6  1  0
  5  7  1  0
  8  9  1  0
  8 13  1  0
  9 10  1  0
 10 11  2  0
 10 12  1  0
 13 14  2  0
 13  2  1  0
M  END
>  <group_A>  (38) 
1

>  <group_B>  (38) 
0

>  <group_C>  (38) 
0

>  <group_D>  (38) 
0

>  <group_G>  (38) 
0

>  <group_H>  (38) 
0

>  <group_J>  (38) 
0

>  <group_L>  (38) 
0

>  <group_M>  (38) 
0

>  <group_N>  (38) 
0

>  <group_P>  (38) 
0

>  <group_R>  (38) 
0

>  <group_S>  (38) 
0

>  <group_V>  (38) 
0

$$$$

     RDKit          2D

  4  3  0  0  0  0  0  0  0  0999 V2000
    1.7321   -0.0000    0.0000 C   0  0  0  0  0  0  0  0  0  0  0  0
    0.8660    0.5000    0.0000 C   0  0  0  0  0  0  0  0  0  0  0  0
    0.8660    1.5000    0.0000 O   0  0  0  0  0  0  0  0  0  0  0  0
   -0.0000   -0.0000    0.0000 O   0  0  0  0  0  0  0  0  0  0  0  0
  1  2  1  0
  2  3  2  0
  2  4  1  0
M  CHG  1   4  -1
M  END
>  <group_A>  (39) 
1

>  <group_B>  (39) 
1

>  <group_C>  (39) 
1

>  <group_D>  (39) 
1

>  <group_G>  (39) 
1

>  <group_H>  (39) 
0

>  <group_J>  (39) 
1

>  <group_L>  (39) 
1

>  <group_M>  (39) 
1

>  <group_N>  (39) 
1

>  <group_P>  (39) 
1

>  <group_R>  (39) 
1

>  <group_S>  (39) 
1

>  <group_V>  (39) 
1

$$$$

     RDKit          2D

 12 11  0  0  0  0  0  0  0  0999 V2000
    5.1962   -0.0000    0.0000 N   0  0  0  0  0  0  0  0  0  0  0  0
    5.1962    1.0000    0.0000 C   0  0  0  0  0  0  0  0  0  0  0  0
    6.0622    1.5000    0.0000 N   0  0  0  0  0  0  0  0  0  0  0  0
    4.3301    1.5000    0.0000 N   0  0  0  0  0  0  0  0  0  0  0  0
    3.4641    1.0000    0.0000 C   0  0  0  0  0  0  0  0  0  0  0  0
    2.5981    1.5000    0.0000 C   0  0  0  0  0  0  0  0  0  0  0  0
    1.7321    1.0000    0.0000 C   0  0  0  0  0  0  0  0  0  0  0  0
    0.8660    1.5000    0.0000 C   0  0  0  0  0  0  0  0  0  0  0  0
    0.8660    2.5000    0.0000 N   0  0  0  0  0  0  0  0  0  0  0  0
    0.0000    1.0000    0.0000 C   0  0  0  0  0  0  0  0  0  0  0  0
   -0.8660    1.5000    0.0000 O   0  0  0  0  0  0  0  0  0  0  0  0
    0.0000    0.0000    0.0000 O   0  0  0  0  0  0  0  0  0  0  0  0
  1  2  1  0
  2  3  2  0
  2  4  1  0
  4  5  1  0
  5  6  1  0
  6  7  1  0
  7  8  1  0
  8  9  1  0
  8 10  1  0
 10 11  2  0
 10 12  1  0
M  CHG  1   3   1
M  END
>  <group_A>  (40) 
1

>  <group_B>  (40) 
1

>  <group_C>  (40) 
0

>  <group_D>  (40) 
0

>  <group_G>  (40) 
1

>  <group_H>  (40) 
0

>  <group_J>  (40) 
0

>  <group_L>  (40) 
0

>  <group_M>  (40) 
0

>  <group_N>  (40) 
0

>  <group_P>  (40) 
0

>  <group_R>  (40) 
0

>  <group_S>  (40) 
1

>  <group_V>  (40) 
0

$$$$

     RDKit          2D

 11 11  0  0  0  0  0  0  0  0999 V2000
   -0.0000   -1.0000    0.0000 C   0  0  0  0  0  0  0  0  0  0  0  0
    0.0000    0.0000    0.0000 C   0  0  0  0  0  0  0  0  0  0  0  0
   -0.8660    0.5000    0.0000 O   0  0  0  0  0  0  0  0  0  0  0  0
   -0.8660    1.5000    0.0000 C   0  0  0  0  0  0  0  0  0  0  0  0
   -1.7321    2.0000    0.0000 O   0  0  0  0  0  0  0  0  0  0  0  0
    0.0000    2.0000    0.0000 C   0  0  0  0  0  0  0  0  0  0  0  0
    0.0000    3.0000    0.0000 O   0  0  0  0  0  0  0  0  0  0  0  0
    0.8660    1.5000    0.0000 C   0  0  0  0  0  0  0  0  0  0  0  0
    1.7321    2.0000    0.0000 O   0  0  0  0  0  0  0  0  0  0  0  0
    0.8660    0.5000    0.0000 C   0  0  0  0  0  0  0  0  0  0  0  0
    1.7321    0.0000    0.0000 O   0  0  0  0  0  0  0  0  0  0  0  0
  1  2  1  0
  2  3  1  0
  3  4  1  0
  4  5  1  0
  4  6  1  0
  6  7  1  0
  6  8  1  0
  8  9  1  0
  8 10  1  0
 10 11  1  0
 10  2  1  0
M  END
>  <group_A>  (41) 
1

>  <group_B>  (41) 
1

>  <group_C>  (41) 
1

>  <group_D>  (41) 
0

>  <group_G>  (41) 
1

>  <group_H>  (41) 
0

>  <group_J>  (41) 
1

>  <group_L>  (41) 
0

>  <group_M>  (41) 
1

>  <group_N>  (41) 
1

>  <group_P>  (41) 
0

>  <group_R>  (41) 
1

>  <group_S>  (41) 
1

>  <group_V>  (41) 
1

$$$$

     RDKit          2D

 15 15  0  0  0  0  0  0  0  0999 V2000
   -1.7321   -1.0000    0.0000 C   0  0  0  0  0  0  0  0  0  0  0  0
   -0.8660   -1.5000    0.0000 C   0  0  0  0  0  0  0  0  0  0  0  0
   -0.8660   -2.5000    0.0000 O   0  0  0  0  0  0  0  0  0  0  0  0
   -0.0000   -1.0000    0.0000 N   0  0  0  0  0  0  0  0  0  0  0  0
    0.0000   -0.0000    0.0000 C   0  0  0  0  0  0  0  0  0  0  0  0
   -0.8660    0.5000    0.0000 C   0  0  0  0  0  0  0  0  0  0  0  0
   -1.7321   -0.0000    0.0000 O   0  0  0  0  0  0  0  0  0  0  0  0
   -0.8660    1.5000    0.0000 O   0  0  0  0  0  0  0  0  0  0  0  0
    0.0000    2.0000    0.0000 C   0  0  0  0  0  0  0  0  0  0  0  0
    0.0000    3.0000    0.0000 C   0  0  0  0  0  0  0  0  0  0  0  0
    0.8660    3.5000    0.0000 O   0  0  0  0  0  0  0  0  0  0  0  0
    0.8660    1.5000    0.0000 C   0  0  0  0  0  0  0  0  0  0  0  0
    1.7321    2.0000    0.0000 O   0  0  0  0  0  0  0  0  0  0  0  0
    0.8660    0.5000    0.0000 C   0  0  0  0  0  0  0  0  0  0  0  0
    1.7321    0.0000    0.0000 O   0  0  0  0  0  0  0  0  0  0  0  0
  1  2  1  0
  2  3  2  0
  2  4  1  0
  4  5  1  0
  5  6  1  0
  6  7  1  0
  6  8  1  0
  8  9  1  0
  9 10  1  0
  9 12  1  0
 10 11  1  0
 12 13  1  0
 12 14  1  0
 14 15  1  0
 14  5  1  0
M  END
>  <group_A>  (42) 
1

>  <group_B>  (42) 
1

>  <group_C>  (42) 
1

>  <group_D>  (42) 
0

>  <group_G>  (42) 
1

>  <group_H>  (42) 
0

>  <group_J>  (42) 
0

>  <group_L>  (42) 
0

>  <group_M>  (42) 
1

>  <group_N>  (42) 
1

>  <group_P>  (42) 
0

>  <group_R>  (42) 
0

>  <group_S>  (42) 
1

>  <group_V>  (42) 
1

$$$$

     RDKit          2D

 11 11  0  0  0  0  0  0  0  0999 V2000
   -1.7321   -1.0000    0.0000 N   0  0  0  0  0  0  0  0  0  0  0  0
   -0.8660   -1.5000    0.0000 C   0  0  0  0  0  0  0  0  0  0  0  0
   -0.8660   -2.5000    0.0000 C   0  0  0  0  0  0  0  0  0  0  0  0
    0.0000   -3.0000    0.0000 O   0  0  0  0  0  0  0  0  0  0  0  0
    0.0000   -1.0000    0.0000 C   0  0  0  0  0  0  0  0  0  0  0  0
    0.0000   -0.0000    0.0000 C   0  0  0  0  0  0  0  0  0  0  0  0
   -0.8660    0.5000    0.0000 C   0  0  0  0  0  0  0  0  0  0  0  0
   -0.8660    1.5000    0.0000 C   0  0  0  0  0  0  0  0  0  0  0  0
    0.0000    2.0000    0.0000 C   0  0  0  0  0  0  0  0  0  0  0  0
    0.8660    1.5000    0.0000 C   0  0  0  0  0  0  0  0  0  0  0  0
    0.8660    0.5000    0.0000 C   0  0  0  0  0  0  0  0  0  0  0  0
  1  2  1  0
  2  3  1  0
  2  5  1  0
  3  4  2  0
  5  6  1  0
  6  7  2  0
  7  8  1  0
  8  9  2  0
  9 10  1  0
 10 11  2  0
 11  6  1  0
M  END
>  <group_A>  (43) 
1

>  <group_B>  (43) 
1

>  <group_C>  (43) 
0

>  <group_D>  (43) 
0

>  <group_G>  (43) 
0

>  <group_H>  (43) 
0

>  <group_J>  (43) 
0

>  <group_L>  (43) 
0

>  <group_M>  (43) 
0

>  <group_N>  (43) 
0

>  <group_P>  (43) 
0

>  <group_R>  (43) 
0

>  <group_S>  (43) 
0

>  <group_V>  (43) 
0

$$$$

     RDKit          2D

  8  7  0  0  0  0  0  0  0  0999 V2000
    2.5981   -1.5000    0.0000 C   0  0  0  0  0  0  0  0  0  0  0  0
    2.5981   -0.5000    0.0000 C   0  0  0  0  0  0  0  0  0  0  0  0
    3.4641   -0.0000    0.0000 O   0  0  0  0  0  0  0  0  0  0  0  0
    1.7321   -0.0000    0.0000 C   0  0  0  0  0  0  0  0  0  0  0  0
    0.8660   -0.5000    0.0000 C   0  0  0  0  0  0  0  0  0  0  0  0
    0.3660   -1.3660    0.0000 C   0  0  0  0  0  0  0  0  0  0  0  0
    1.3660   -1.3660    0.0000 C   0  0  0  0  0  0  0  0  0  0  0  0
    0.0000    0.0000    0.0000 O   0  0  0  0  0  0  0  0  0  0  0  0
  1  2  1  0
  2  3  1  0
  2  4  1  0
  4  5  1  0
  5  6  1  0
  5  7  1  0
  5  8  1  0
M  END
>  <group_A>  (44) 
1

>  <group_B>  (44) 
1

>  <group_C>  (44) 
1

>  <group_D>  (44) 
1

>  <group_G>  (44) 
1

>  <group_H>  (44) 
0

>  <group_J>  (44) 
1

>  <group_L>  (44) 
0

>  <group_M>  (44) 
1

>  <group_N>  (44) 
1

>  <group_P>  (44) 
0

>  <group_R>  (44) 
0

>  <group_S>  (44) 
1

>  <group_V>  (44) 
1

$$$$

     RDKit          2D

  8  7  0  0  0  0  0  0  0  0999 V2000
    1.5000   -1.8660    0.0000 N   0  0  0  0  0  0  0  0  0  0  0  0
    1.5000   -0.8660    0.0000 C   0  0  0  0  0  0  0  0  0  0  0  0
    2.5000   -0.8660    0.0000 C   0  0  0  0  0  0  0  0  0  0  0  0
    3.0000    0.0000    0.0000 O   0  0  0  0  0  0  0  0  0  0  0  0
    1.5000    0.1340    0.0000 C   0  0  0  0  0  0  0  0  0  0  0  0
    0.6340    0.6340    0.0000 O   0  0  0  0  0  0  0  0  0  0  0  0
    0.5000   -0.8660    0.0000 C   0  0  0  0  0  0  0  0  0  0  0  0
   -0.0000   -0.0000    0.0000 O   0  0  0  0  0  0  0  0  0  0  0  0
  1  2  1  0
  2  3  1  0
  2  5  1  0
  2  7  1  0
  3  4  1  0
  5  6  1  0
  7  8  1  0
M  CHG  1   1   1
M  END
>  <group_A>  (45) 
1

>  <group_B>  (45) 
1

>  <group_C>  (45) 
1

>  <group_D>  (45) 
1

>  <group_G>  (45) 
1

>  <group_H>  (45) 
0

>  <group_J>  (45) 
1

>  <group_L>  (45) 
0

>  <group_M>  (45) 
1

>  <group_N>  (45) 
1

>  <group_P>  (45) 
0

>  <group_R>  (45) 
0

>  <group_S>  (45) 
1

>  <group_V>  (45) 
1

$$$$

     RDKit          2D

 31 33  0  0  0  0  0  0  0  0999 V2000
    7.9690   -4.1583    0.0000 N   0  0  0  0  0  0  0  0  0  0  0  0
    7.3812   -3.3493    0.0000 C   0  0  0  0  0  0  0  0  0  0  0  0
    7.7880   -2.4357    0.0000 N   0  0  0  0  0  0  0  0  0  0  0  0
    7.2002   -1.6267    0.0000 C   0  0  0  0  0  0  0  0  0  0  0  0
    6.2057   -1.7312    0.0000 N   0  0  0  0  0  0  0  0  0  0  0  0
    5.7989   -2.6448    0.0000 C   0  0  0  0  0  0  0  0  0  0  0  0
    6.3867   -3.4538    0.0000 C   0  0  0  0  0  0  0  0  0  0  0  0
    5.7989   -4.2628    0.0000 N   0  0  0  0  0  0  0  0  0  0  0  0
    4.8479   -3.9538    0.0000 C   0  0  0  0  0  0  0  0  0  0  0  0
    4.8479   -2.9538    0.0000 N   0  0  0  0  0  0  0  0  0  0  0  0
    4.0388   -2.3660    0.0000 C   0  0  0  0  0  0  0  0  0  0  0  0
    3.0878   -2.6750    0.0000 O   0  0  0  0  0  0  0  0  0  0  0  0
    2.5000   -1.8660    0.0000 C   0  0  0  0  0  0  0  0  0  0  0  0
    1.5000   -1.8660    0.0000 C   0  0  0  0  0  0  0  0  0  0  0  0
    1.0000   -1.0000    0.0000 O   0  0  0  0  0  0  0  0  0  0  0  0
    0.0000   -1.0000    0.0000 P   0  0  0  0  0  0  0  0  0  0  0  0
   -0.0000   -2.0000    0.0000 O   0  0  0  0  0  0  0  0  0  0  0  0
   -1.0000   -1.0000    0.0000 O   0  0  0  0  0  0  0  0  0  0  0  0
    0.0000   -0.0000    0.0000 O   0  0  0  0  0  0  0  0  0  0  0  0
    0.0000    1.0000    0.0000 P   0  0  0  0  0  0  0  0  0  0  0  0
   -1.0000    1.0000    0.0000 O   0  0  0  0  0  0  0  0  0  0  0  0
    0.0000    2.0000    0.0000 O   0  0  0  0  0  0  0  0  0  0  0  0
    1.0000    1.0000    0.0000 O   0  0  0  0  0  0  0  0  0  0  0  0
    2.0000    1.0000    0.0000 P   0  0  0  0  0  0  0  0  0  0  0  0
    2.0000    2.0000    0.0000 O   0  0  0  0  0  0  0  0  0  0  0  0
    3.0000    1.0000    0.0000 O   0  0  0  0  0  0  0  0  0  0  0  0
    2.0000    0.0000    0.0000 S   0  0  0  0  0  0  0  0  0  0  0  0
    3.0878   -1.0570    0.0000 C   0  0  0  0  0  0  0  0  0  0  0  0
    2.7788   -0.1060    0.0000 O   0  0  0  0  0  0  0  0  0  0  0  0
    4.0388   -1.3660    0.0000 C   0  0  0  0  0  0  0  0  0  0  0  0
    4.8479   -0.7782    0.0000 O   0  0  0  0  0  0  0  0  0  0  0  0
  1  2  1  0
  2  3  2  0
  3  4  1  0
  4  5  2  0
  5  6  1  0
  6  7  2  0
  7  8  1  0
  7  2  1  0
  8  9  2  0
  9 10  1  0
 10 11  1  0
 10  6  1  0
 11 12  1  0
 12 13  1  0
 13 14  1  0
 13 28  1  0
 14 15  1  0
 15 16  1  0
 16 17  2  0
 16 18  1  0
 16 19  1  0
 19 20  1  0
 20 21  2  0
 20 22  1  0
 20 23  1  0
 23 24  1  0
 24 25  1  0
 24 26  1  0
 24 27  2  0
 28 29  1  0
 28 30  1  0
 30 31  1  0
 30 11  1  0
M  END
>  <group_A>  (46) 
1

>  <group_B>  (46) 
0

>  <group_C>  (46) 
0

>  <group_D>  (46) 
0

>  <group_G>  (46) 
0

>  <group_H>  (46) 
0

>  <group_J>  (46) 
0

>  <group_L>  (46) 
0

>  <group_M>  (46) 
0

>  <group_N>  (46) 
0

>  <group_P>  (46) 
0

>  <group_R>  (46) 
0

>  <group_S>  (46) 
0

>  <group_V>  (46) 
0

$$$$

     RDKit          2D

 25 25  0  0  0  0  0  0  0  0999 V2000
   -3.3301    0.5000    0.0000 C   0  0  0  0  0  0  0  0  0  0  0  0
   -2.4641    0.0000    0.0000 C   0  0  0  0  0  0  0  0  0  0  0  0
   -1.5981    0.5000    0.0000 N   0  0  0  0  0  0  0  0  0  0  0  0
   -0.7321    0.0000    0.0000 C   0  0  0  0  0  0  0  0  0  0  0  0
   -0.7321   -1.0000    0.0000 C   0  0  0  0  0  0  0  0  0  0  0  0
    0.1340   -1.5000    0.0000 C   0  0  0  0  0  0  0  0  0  0  0  0
    1.0000   -1.0000    0.0000 O   0  0  0  0  0  0  0  0  0  0  0  0
    1.0000   -0.0000    0.0000 P   0  0  0  0  0  0  0  0  0  0  0  0
    2.0000    0.0000    0.0000 O   0  0  0  0  0  0  0  0  0  0  0  0
    1.0000    1.0000    0.0000 O   0  0  0  0  0  0  0  0  0  0  0  0
    0.0000   -0.0000    0.0000 O   0  0  0  0  0  0  0  0  0  0  0  0
   -1.5981   -1.5000    0.0000 C   0  0  0  0  0  0  0  0  0  0  0  0
   -1.5981   -2.5000    0.0000 C   0  0  0  0  0  0  0  0  0  0  0  0
   -0.7321   -3.0000    0.0000 N   0  0  0  0  0  0  0  0  0  0  0  0
    0.1340   -2.5000    0.0000 C   0  0  0  0  0  0  0  0  0  0  0  0
    1.0000   -3.0000    0.0000 C   0  0  0  0  0  0  0  0  0  0  0  0
    1.8660   -2.5000    0.0000 C   0  0  0  0  0  0  0  0  0  0  0  0
    2.7321   -3.0000    0.0000 C   0  0  0  0  0  0  0  0  0  0  0  0
    2.7321   -4.0000    0.0000 C   0  0  0  0  0  0  0  0  0  0  0  0
    1.8660   -4.5000    0.0000 N   0  0  0  0  0  0  0  0  0  0  0  0
    3.5981   -4.5000    0.0000 C   0  0  0  0  0  0  0  0  0  0  0  0
    3.5981   -5.5000    0.0000 O   0  0  0  0  0  0  0  0  0  0  0  0
    4.4641   -4.0000    0.0000 O   0  0  0  0  0  0  0  0  0  0  0  0
   -2.4641   -1.0000    0.0000 C   0  0  0  0  0  0  0  0  0  0  0  0
   -3.3301   -1.5000    0.0000 O   0  0  0  0  0  0  0  0  0  0  0  0
  1  2  1  0
  2  3  2  0
  3  4  1  0
  4  5  2  0
  5  6  1  0
  5 12  1  0
  6  7  1  0
  7  8  1  0
  8  9  2  0
  8 10  1  0
  8 11  1  0
 12 13  1  0
 12 24  2  0
 13 14  2  3
 14 15  1  0
 15 16  1  0
 16 17  1  0
 17 18  1  0
 18 19  1  0
 19 20  1  0
 19 21  1  0
 21 22  2  0
 21 23  1  0
 24 25  1  0
 24  2  1  0
M  END
>  <group_A>  (47) 
1

>  <group_B>  (47) 
1

>  <group_C>  (47) 
0

>  <group_D>  (47) 
0

>  <group_G>  (47) 
1

>  <group_H>  (47) 
0

>  <group_J>  (47) 
0

>  <group_L>  (47) 
0

>  <group_M>  (47) 
1

>  <group_N>  (47) 
1

>  <group_P>  (47) 
0

>  <group_R>  (47) 
0

>  <group_S>  (47) 
1

>  <group_V>  (47) 
1

$$$$

     RDKit          2D

 20 20  0  0  0  0  0  0  0  0999 V2000
    1.0000   -1.0000    0.0000 O   0  0  0  0  0  0  0  0  0  0  0  0
    1.0000   -0.0000    0.0000 P   0  0  0  0  0  0  0  0  0  0  0  0
    2.0000   -0.0000    0.0000 O   0  0  0  0  0  0  0  0  0  0  0  0
    1.0000    1.0000    0.0000 O   0  0  0  0  0  0  0  0  0  0  0  0
    0.0000    0.0000    0.0000 O   0  0  0  0  0  0  0  0  0  0  0  0
   -0.5000    0.8660    0.0000 C   0  0  0  0  0  0  0  0  0  0  0  0
   -1.5000    0.8660    0.0000 C   0  0  0  0  0  0  0  0  0  0  0  0
   -2.0878    0.0570    0.0000 O   0  0  0  0  0  0  0  0  0  0  0  0
   -3.0388    0.3660    0.0000 C   0  0  0  0  0  0  0  0  0  0  0  0
   -4.0334    0.2615    0.0000 O   0  0  0  0  0  0  0  0  0  0  0  0
   -3.4456   -0.5475    0.0000 C   0  0  0  0  0  0  0  0  0  0  0  0
   -4.4401   -0.6520    0.0000 O   0  0  0  0  0  0  0  0  0  0  0  0
   -5.0279    0.1570    0.0000 P   0  0  0  0  0  0  0  0  0  0  0  0
   -4.2189    0.7448    0.0000 O   0  0  0  0  0  0  0  0  0  0  0  0
   -5.6157    0.9660    0.0000 O   0  0  0  0  0  0  0  0  0  0  0  0
   -5.8369   -0.4308    0.0000 O   0  0  0  0  0  0  0  0  0  0  0  0
   -3.0388    1.3660    0.0000 C   0  0  0  0  0  0  0  0  0  0  0  0
   -3.8479    1.9538    0.0000 O   0  0  0  0  0  0  0  0  0  0  0  0
   -2.0878    1.6750    0.0000 C   0  0  0  0  0  0  0  0  0  0  0  0
   -1.7788    2.6261    0.0000 O   0  0  0  0  0  0  0  0  0  0  0  0
  1  2  2  0
  2  3  1  0
  2  4  1  0
  2  5  1  0
  5  6  1  0
  6  7  1  0
  7  8  1  0
  8  9  1  0
  9 10  1  0
  9 11  1  0
  9 17  1  0
 11 12  1  0
 12 13  1  0
 13 14  2  0
 13 15  1  0
 13 16  1  0
 17 18  1  0
 17 19  1  0
 19 20  1  0
 19  7  1  0
M  END
>  <group_A>  (48) 
1

>  <group_B>  (48) 
0

>  <group_C>  (48) 
0

>  <group_D>  (48) 
0

>  <group_G>  (48) 
0

>  <group_H>  (48) 
0

>  <group_J>  (48) 
0

>  <group_L>  (48) 
0

>  <group_M>  (48) 
0

>  <group_N>  (48) 
0

>  <group_P>  (48) 
0

>  <group_R>  (48) 
0

>  <group_S>  (48) 
0

>  <group_V>  (48) 
0

$$$$

     RDKit          2D

 15 15  0  0  0  0  0  0  0  0999 V2000
   -1.0000   -1.0000    0.0000 O   0  0  0  0  0  0  0  0  0  0  0  0
    0.0000   -1.0000    0.0000 S   0  0  0  0  0  0  0  0  0  0  0  0
    0.0000   -2.0000    0.0000 O   0  0  0  0  0  0  0  0  0  0  0  0
    1.0000   -1.0000    0.0000 O   0  0  0  0  0  0  0  0  0  0  0  0
    0.0000    0.0000    0.0000 C   0  0  0  0  0  0  0  0  0  0  0  0
    0.8660    0.5000    0.0000 C   0  0  0  0  0  0  0  0  0  0  0  0
    1.7321    0.0000    0.0000 N   0  0  0  0  0  0  0  0  0  0  0  0
    2.5981    0.5000    0.0000 C   0  0  0  0  0  0  0  0  0  0  0  0
    3.4641    0.0000    0.0000 C   0  0  0  0  0  0  0  0  0  0  0  0
    3.4641   -1.0000    0.0000 N   0  0  0  0  0  0  0  0  0  0  0  0
    4.3301   -1.5000    0.0000 C   0  0  0  0  0  0  0  0  0  0  0  0
    4.3301   -2.5000    0.0000 C   0  0  0  0  0  0  0  0  0  0  0  0
    5.1962   -3.0000    0.0000 O   0  0  0  0  0  0  0  0  0  0  0  0
    2.5981   -1.5000    0.0000 C   0  0  0  0  0  0  0  0  0  0  0  0
    1.7321   -1.0000    0.0000 C   0  0  0  0  0  0  0  0  0  0  0  0
  1  2  2  0
  2  3  2  0
  2  4  1  0
  2  5  1  0
  5  6  1  0
  6  7  1  0
  7  8  1  0
  8  9  1  0
  9 10  1  0
 10 11  1  0
 10 14  1  0
 11 12  1  0
 12 13  1  0
 14 15  1  0
 15  7  1  0
M  END
>  <group_A>  (49) 
1

>  <group_B>  (49) 
1

>  <group_C>  (49) 
1

>  <group_D>  (49) 
1

>  <group_G>  (49) 
1

>  <group_H>  (49) 
0

>  <group_J>  (49) 
0

>  <group_L>  (49) 
0

>  <group_M>  (49) 
1

>  <group_N>  (49) 
0

>  <group_P>  (49) 
0

>  <group_R>  (49) 
0

>  <group_S>  (49) 
1

>  <group_V>  (49) 
1

$$$$

     RDKit          2D

 12 12  0  0  0  0  0  0  0  0999 V2000
   -0.8660   -1.5000    0.0000 O   0  0  0  0  0  0  0  0  0  0  0  0
    0.0000   -1.0000    0.0000 C   0  0  0  0  0  0  0  0  0  0  0  0
    0.0000    0.0000    0.0000 C   0  0  0  0  0  0  0  0  0  0  0  0
   -0.8660    0.5000    0.0000 O   0  0  0  0  0  0  0  0  0  0  0  0
   -0.8660    1.5000    0.0000 C   0  0  0  0  0  0  0  0  0  0  0  0
   -1.7321    2.0000    0.0000 O   0  0  0  0  0  0  0  0  0  0  0  0
   -0.0000    2.0000    0.0000 C   0  0  0  0  0  0  0  0  0  0  0  0
    0.0000    3.0000    0.0000 O   0  0  0  0  0  0  0  0  0  0  0  0
    0.8660    1.5000    0.0000 C   0  0  0  0  0  0  0  0  0  0  0  0
    1.7321    2.0000    0.0000 O   0  0  0  0  0  0  0  0  0  0  0  0
    0.8660    0.5000    0.0000 C   0  0  0  0  0  0  0  0  0  0  0  0
    1.7321    0.0000    0.0000 O   0  0  0  0  0  0  0  0  0  0  0  0
  1  2  1  0
  2  3  1  0
  3  4  1  0
  4  5  1  0
  5  6  1  0
  5  7  1  0
  7  8  1  0
  7  9  1  0
  9 10  1  0
  9 11  1  0
 11 12  1  0
 11  3  1  0
M  END
>  <group_A>  (50) 
1

>  <group_B>  (50) 
1

>  <group_C>  (50) 
1

>  <group_D>  (50) 
1

>  <group_G>  (50) 
1

>  <group_H>  (50) 
0

>  <group_J>  (50) 
0

>  <group_L>  (50) 
0

>  <group_M>  (50) 
1

>  <group_N>  (50) 
1

>  <group_P>  (50) 
0

>  <group_R>  (50) 
0

>  <group_S>  (50) 
1

>  <group_V>  (50) 
1

$$$$

     RDKit          2D

 12 12  0  0  0  0  0  0  0  0999 V2000
   -0.8660   -1.5000    0.0000 O   0  0  0  0  0  0  0  0  0  0  0  0
    0.0000   -1.0000    0.0000 C   0  0  0  0  0  0  0  0  0  0  0  0
    0.0000    0.0000    0.0000 C   0  0  0  0  0  0  0  0  0  0  0  0
   -0.8660    0.5000    0.0000 O   0  0  0  0  0  0  0  0  0  0  0  0
   -0.8660    1.5000    0.0000 C   0  0  0  0  0  0  0  0  0  0  0  0
   -1.7321    2.0000    0.0000 O   0  0  0  0  0  0  0  0  0  0  0  0
   -0.0000    2.0000    0.0000 C   0  0  0  0  0  0  0  0  0  0  0  0
    0.0000    3.0000    0.0000 O   0  0  0  0  0  0  0  0  0  0  0  0
    0.8660    1.5000    0.0000 C   0  0  0  0  0  0  0  0  0  0  0  0
    1.7321    2.0000    0.0000 O   0  0  0  0  0  0  0  0  0  0  0  0
    0.8660    0.5000    0.0000 C   0  0  0  0  0  0  0  0  0  0  0  0
    1.7321    0.0000    0.0000 O   0  0  0  0  0  0  0  0  0  0  0  0
  1  2  1  0
  2  3  1  0
  3  4  1  0
  4  5  1  0
  5  6  1  0
  5  7  1  0
  7  8  1  0
  7  9  1  0
  9 10  1  0
  9 11  1  0
 11 12  1  0
 11  3  1  0
M  END
>  <group_A>  (51) 
1

>  <group_B>  (51) 
1

>  <group_C>  (51) 
1

>  <group_D>  (51) 
0

>  <group_G>  (51) 
1

>  <group_H>  (51) 
0

>  <group_J>  (51) 
0

>  <group_L>  (51) 
0

>  <group_M>  (51) 
1

>  <group_N>  (51) 
0

>  <group_P>  (51) 
0

>  <group_R>  (51) 
0

>  <group_S>  (51) 
1

>  <group_V>  (51) 
1

$$$$

     RDKit          2D

  8  7  0  0  0  0  0  0  0  0999 V2000
    5.1962   -1.0000    0.0000 C   0  0  0  0  0  0  0  0  0  0  0  0
    5.1962    0.0000    0.0000 C   0  0  0  0  0  0  0  0  0  0  0  0
    4.3301    0.5000    0.0000 C   0  0  0  0  0  0  0  0  0  0  0  0
    3.4641   -0.0000    0.0000 C   0  0  0  0  0  0  0  0  0  0  0  0
    2.5981    0.5000    0.0000 C   0  0  0  0  0  0  0  0  0  0  0  0
    1.7321   -0.0000    0.0000 C   0  0  0  0  0  0  0  0  0  0  0  0
    0.8660    0.5000    0.0000 C   0  0  0  0  0  0  0  0  0  0  0  0
   -0.0000   -0.0000    0.0000 C   0  0  0  0  0  0  0  0  0  0  0  0
  1  2  1  0
  2  3  1  0
  3  4  1  0
  4  5  1  0
  5  6  1  0
  6  7  1  0
  7  8  1  0
M  END
>  <group_A>  (52) 
1

>  <group_B>  (52) 
1

>  <group_C>  (52) 
1

>  <group_D>  (52) 
0

>  <group_G>  (52) 
0

>  <group_H>  (52) 
0

>  <group_J>  (52) 
0

>  <group_L>  (52) 
0

>  <group_M>  (52) 
0

>  <group_N>  (52) 
0

>  <group_P>  (52) 
0

>  <group_R>  (52) 
0

>  <group_S>  (52) 
0

>  <group_V>  (52) 
1

$$$$

     RDKit          2D

 21 21  0  0  0  0  0  0  0  0999 V2000
    2.5981   -4.5000    0.0000 C   0  0  0  0  0  0  0  0  0  0  0  0
    1.7321   -4.0000    0.0000 C   0  0  0  0  0  0  0  0  0  0  0  0
    1.7321   -3.0000    0.0000 C   0  0  0  0  0  0  0  0  0  0  0  0
    2.5981   -2.5000    0.0000 C   0  0  0  0  0  0  0  0  0  0  0  0
    2.5981   -1.5000    0.0000 C   0  0  0  0  0  0  0  0  0  0  0  0
    1.7321   -1.0000    0.0000 C   0  0  0  0  0  0  0  0  0  0  0  0
    1.7321    0.0000    0.0000 C   0  0  0  0  0  0  0  0  0  0  0  0
    0.8660   -1.5000    0.0000 C   0  0  0  0  0  0  0  0  0  0  0  0
    0.0000   -1.0000    0.0000 C   0  0  0  0  0  0  0  0  0  0  0  0
   -0.0000   -0.0000    0.0000 C   0  0  0  0  0  0  0  0  0  0  0  0
   -0.8660    0.5000    0.0000 C   0  0  0  0  0  0  0  0  0  0  0  0
   -1.7321   -0.0000    0.0000 C   0  0  0  0  0  0  0  0  0  0  0  0
   -0.8660    1.5000    0.0000 C   0  0  0  0  0  0  0  0  0  0  0  0
   -0.0000    2.0000    0.0000 C   0  0  0  0  0  0  0  0  0  0  0  0
    0.8660    1.5000    0.0000 C   0  0  0  0  0  0  0  0  0  0  0  0
    0.8660    0.5000    0.0000 C   0  0  0  0  0  0  0  0  0  0  0  0
    1.3660   -0.3660    0.0000 C   0  0  0  0  0  0  0  0  0  0  0  0
    1.8660    0.5000    0.0000 C   0  0  0  0  0  0  0  0  0  0  0  0
    0.8660   -4.5000    0.0000 C   0  0  0  0  0  0  0  0  0  0  0  0
    0.8660   -5.5000    0.0000 C   0  0  0  0  0  0  0  0  0  0  0  0
    0.0000   -6.0000    0.0000 O   0  0  0  0  0  0  0  0  0  0  0  0
  1  2  1  0
  2  3  1  0
  2 19  2  3
  3  4  2  3
  4  5  1  0
  5  6  2  3
  6  7  1  0
  6  8  1  0
  8  9  2  3
  9 10  1  0
 10 11  2  0
 11 12  1  0
 11 13  1  0
 13 14  1  0
 14 15  1  0
 15 16  1  0
 16 17  1  0
 16 18  1  0
 16 10  1  0
 19 20  1  0
 20 21  2  0
M  END
>  <group_A>  (53) 
1

>  <group_B>  (53) 
1

>  <group_C>  (53) 
1

>  <group_D>  (53) 
0

>  <group_G>  (53) 
1

>  <group_H>  (53) 
0

>  <group_J>  (53) 
0

>  <group_L>  (53) 
0

>  <group_M>  (53) 
0

>  <group_N>  (53) 
0

>  <group_P>  (53) 
0

>  <group_R>  (53) 
0

>  <group_S>  (53) 
1

>  <group_V>  (53) 
1

$$$$

     RDKit          2D

 16 16  0  0  0  0  0  0  0  0999 V2000
    1.0000   -1.0000    0.0000 O   0  0  0  0  0  0  0  0  0  0  0  0
    1.0000   -0.0000    0.0000 S   0  0  0  0  0  0  0  0  0  0  0  0
    2.0000   -0.0000    0.0000 O   0  0  0  0  0  0  0  0  0  0  0  0
    1.0000    1.0000    0.0000 O   0  0  0  0  0  0  0  0  0  0  0  0
    0.0000    0.0000    0.0000 O   0  0  0  0  0  0  0  0  0  0  0  0
   -0.5000    0.8660    0.0000 C   0  0  0  0  0  0  0  0  0  0  0  0
   -1.5000    0.8660    0.0000 C   0  0  0  0  0  0  0  0  0  0  0  0
   -2.0000   -0.0000    0.0000 O   0  0  0  0  0  0  0  0  0  0  0  0
   -2.0000    1.7321    0.0000 C   0  0  0  0  0  0  0  0  0  0  0  0
   -3.0000    1.7321    0.0000 O   0  0  0  0  0  0  0  0  0  0  0  0
   -1.5000    2.5981    0.0000 O   0  0  0  0  0  0  0  0  0  0  0  0
   -0.5000    2.5981    0.0000 C   0  0  0  0  0  0  0  0  0  0  0  0
   -0.0000    3.4641    0.0000 C   0  0  0  0  0  0  0  0  0  0  0  0
    1.0000    3.4641    0.0000 O   0  0  0  0  0  0  0  0  0  0  0  0
   -0.0000    1.7321    0.0000 C   0  0  0  0  0  0  0  0  0  0  0  0
    1.0000    1.7321    0.0000 O   0  0  0  0  0  0  0  0  0  0  0  0
  1  2  2  0
  2  3  2  0
  2  4  1  0
  2  5  1  0
  5  6  1  0
  6  7  1  0
  7  8  1  0
  7  9  1  0
  9 10  1  0
  9 11  1  0
 11 12  1  0
 12 13  1  0
 12 15  1  0
 13 14  1  0
 15 16  1  0
 15  6  1  0
M  END
>  <group_A>  (54) 
0

>  <group_B>  (54) 
1

>  <group_C>  (54) 
1

>  <group_D>  (54) 
0

>  <group_G>  (54) 
0

>  <group_H>  (54) 
0

>  <group_J>  (54) 
0

>  <group_L>  (54) 
0

>  <group_M>  (54) 
0

>  <group_N>  (54) 
0

>  <group_P>  (54) 
0

>  <group_R>  (54) 
0

>  <group_S>  (54) 
0

>  <group_V>  (54) 
1

$$$$

     RDKit          2D

 27 29  0  0  0  0  0  0  0  0999 V2000
    4.3301   -0.5000    0.0000 C   0  0  0  0  0  0  0  0  0  0  0  0
    3.4641    0.0000    0.0000 C   0  0  0  0  0  0  0  0  0  0  0  0
    2.5981   -0.5000    0.0000 C   0  0  0  0  0  0  0  0  0  0  0  0
    1.7321    0.0000    0.0000 C   0  0  0  0  0  0  0  0  0  0  0  0
    0.8660   -0.5000    0.0000 N   0  0  0  0  0  0  0  0  0  0  0  0
   -0.0000   -0.0000    0.0000 C   0  0  0  0  0  0  0  0  0  0  0  0
   -0.8660   -0.5000    0.0000 C   0  0  0  0  0  0  0  0  0  0  0  0
   -0.8660   -1.5000    0.0000 O   0  0  0  0  0  0  0  0  0  0  0  0
   -1.7321   -0.0000    0.0000 N   0  0  0  0  0  0  0  0  0  0  0  0
   -1.7321    1.0000    0.0000 C   0  0  0  0  0  0  0  0  0  0  0  0
   -2.5981    1.5000    0.0000 O   0  0  0  0  0  0  0  0  0  0  0  0
   -0.8660    1.5000    0.0000 N   0  0  0  0  0  0  0  0  0  0  0  0
   -0.0000    1.0000    0.0000 C   0  0  0  0  0  0  0  0  0  0  0  0
    0.8660    1.5000    0.0000 N   0  0  0  0  0  0  0  0  0  0  0  0
    0.8660    2.5000    0.0000 C   0  0  0  0  0  0  0  0  0  0  0  0
    1.7321    3.0000    0.0000 C   0  0  0  0  0  0  0  0  0  0  0  0
    2.5981    2.5000    0.0000 O   0  0  0  0  0  0  0  0  0  0  0  0
    1.7321    4.0000    0.0000 C   0  0  0  0  0  0  0  0  0  0  0  0
    2.5981    4.5000    0.0000 O   0  0  0  0  0  0  0  0  0  0  0  0
    0.8660    4.5000    0.0000 C   0  0  0  0  0  0  0  0  0  0  0  0
    0.8660    5.5000    0.0000 O   0  0  0  0  0  0  0  0  0  0  0  0
   -0.0000    4.0000    0.0000 C   0  0  0  0  0  0  0  0  0  0  0  0
   -0.0000    3.0000    0.0000 O   0  0  0  0  0  0  0  0  0  0  0  0
    1.7321    1.0000    0.0000 C   0  0  0  0  0  0  0  0  0  0  0  0
    2.5981    1.5000    0.0000 C   0  0  0  0  0  0  0  0  0  0  0  0
    3.4641    1.0000    0.0000 C   0  0  0  0  0  0  0  0  0  0  0  0
    4.3301    1.5000    0.0000 C   0  0  0  0  0  0  0  0  0  0  0  0
  1  2  1  0
  2  3  2  0
  3  4  1  0
  4  5  1  0
  5  6  2  0
  6  7  1  0
  7  8  2  0
  7  9  1  0
  9 10  1  0
 10 11  2  0
 10 12  1  0
 12 13  2  0
 13 14  1  0
 13  6  1  0
 14 15  1  0
 14 24  1  0
 15 16  1  0
 16 17  1  0
 16 18  1  0
 18 19  1  0
 18 20  1  0
 20 21  1  0
 20 22  1  0
 22 23  1  0
 24 25  1  0
 24  4  2  0
 25 26  2  0
 26 27  1  0
 26  2  1  0
M  END
>  <group_A>  (55) 
1

>  <group_B>  (55) 
0

>  <group_C>  (55) 
0

>  <group_D>  (55) 
0

>  <group_G>  (55) 
0

>  <group_H>  (55) 
0

>  <group_J>  (55) 
0

>  <group_L>  (55) 
0

>  <group_M>  (55) 
0

>  <group_N>  (55) 
0

>  <group_P>  (55) 
0

>  <group_R>  (55) 
0

>  <group_S>  (55) 
0

>  <group_V>  (55) 
0

$$$$

     RDKit          2D

  1  0  0  0  0  0  0  0  0  0999 V2000
    1.0000    0.0000    0.0000 Ca  0  0  0  0  0 15  0  0  0  0  0  0
M  CHG  1   1   2
M  END
>  <group_A>  (56) 
1

>  <group_B>  (56) 
1

>  <group_C>  (56) 
1

>  <group_D>  (56) 
1

>  <group_G>  (56) 
1

>  <group_H>  (56) 
1

>  <group_J>  (56) 
1

>  <group_L>  (56) 
1

>  <group_M>  (56) 
1

>  <group_N>  (56) 
1

>  <group_P>  (56) 
1

>  <group_R>  (56) 
1

>  <group_S>  (56) 
1

>  <group_V>  (56) 
1

$$$$

     RDKit          2D

  4  3  0  0  0  0  0  0  0  0999 V2000
    1.7321   -0.0000    0.0000 C   0  0  0  0  0  0  0  0  0  0  0  0
    0.8660    0.5000    0.0000 C   0  0  0  0  0  0  0  0  0  0  0  0
    0.8660    1.5000    0.0000 O   0  0  0  0  0  0  0  0  0  0  0  0
   -0.0000   -0.0000    0.0000 O   0  0  0  0  0  0  0  0  0  0  0  0
  1  2  1  0
  2  3  2  0
  2  4  1  0
M  END
>  <group_A>  (57) 
1

>  <group_B>  (57) 
1

>  <group_C>  (57) 
1

>  <group_D>  (57) 
1

>  <group_G>  (57) 
1

>  <group_H>  (57) 
0

>  <group_J>  (57) 
1

>  <group_L>  (57) 
0

>  <group_M>  (57) 
1

>  <group_N>  (57) 
1

>  <group_P>  (57) 
0

>  <group_R>  (57) 
0

>  <group_S>  (57) 
1

>  <group_V>  (57) 
1

$$$$

     RDKit          2D

  6  5  0  0  0  0  0  0  0  0999 V2000
    1.7321    1.0000    0.0000 C   0  0  0  0  0  0  0  0  0  0  0  0
    0.8660    1.5000    0.0000 C   0  0  0  0  0  0  0  0  0  0  0  0
    0.8660    2.5000    0.0000 N   0  0  0  0  0  0  0  0  0  0  0  0
    0.0000    1.0000    0.0000 C   0  0  0  0  0  0  0  0  0  0  0  0
   -0.8660    1.5000    0.0000 O   0  0  0  0  0  0  0  0  0  0  0  0
   -0.0000   -0.0000    0.0000 O   0  0  0  0  0  0  0  0  0  0  0  0
  1  2  1  0
  2  3  1  0
  2  4  1  0
  4  5  2  0
  4  6  1  0
M  END
>  <group_A>  (58) 
1

>  <group_B>  (58) 
1

>  <group_C>  (58) 
1

>  <group_D>  (58) 
1

>  <group_G>  (58) 
1

>  <group_H>  (58) 
0

>  <group_J>  (58) 
0

>  <group_L>  (58) 
0

>  <group_M>  (58) 
1

>  <group_N>  (58) 
1

>  <group_P>  (58) 
0

>  <group_R>  (58) 
1

>  <group_S>  (58) 
1

>  <group_V>  (58) 
1

$$$$

     RDKit          2D

 53 58  0  0  0  0  0  0  0  0999 V2000
   -4.5000   -5.3301    0.0000 C   0  0  0  0  0  0  0  0  0  0  0  0
   -3.5000   -5.3301    0.0000 C   0  0  0  0  0  0  0  0  0  0  0  0
   -3.0000   -6.1962    0.0000 C   0  0  0  0  0  0  0  0  0  0  0  0
   -2.0000   -6.1962    0.0000 C   0  0  0  0  0  0  0  0  0  0  0  0
   -1.5000   -7.0622    0.0000 N   0  0  0  0  0  0  0  0  0  0  0  0
   -0.5000   -7.0622    0.0000 C   0  0  0  0  0  0  0  0  0  0  0  0
   -0.0000   -7.9282    0.0000 C   0  0  0  0  0  0  0  0  0  0  0  0
   -0.5000   -8.7942    0.0000 O   0  0  0  0  0  0  0  0  0  0  0  0
    1.0000   -7.9282    0.0000 N   0  0  0  0  0  0  0  0  0  0  0  0
    1.5000   -7.0622    0.0000 C   0  0  0  0  0  0  0  0  0  0  0  0
    2.5000   -7.0622    0.0000 O   0  0  0  0  0  0  0  0  0  0  0  0
    1.0000   -6.1962    0.0000 N   0  0  0  0  0  0  0  0  0  0  0  0
   -0.0000   -6.1962    0.0000 C   0  0  0  0  0  0  0  0  0  0  0  0
   -0.5000   -5.3301    0.0000 N   0  0  0  0  0  0  0  0  0  0  0  0
   -0.0000   -4.4641    0.0000 C   0  0  0  0  0  0  0  0  0  0  0  0
    1.0000   -4.4641    0.0000 C   0  0  0  0  0  0  0  0  0  0  0  0
    1.5000   -5.3301    0.0000 O   0  0  0  0  0  0  0  0  0  0  0  0
    1.5000   -3.5981    0.0000 C   0  0  0  0  0  0  0  0  0  0  0  0
    2.5000   -3.5981    0.0000 O   0  0  0  0  0  0  0  0  0  0  0  0
    1.0000   -2.7321    0.0000 C   0  0  0  0  0  0  0  0  0  0  0  0
   -0.0000   -2.7321    0.0000 O   0  0  0  0  0  0  0  0  0  0  0  0
    1.5000   -1.8660    0.0000 C   0  0  0  0  0  0  0  0  0  0  0  0
    1.0000   -1.0000    0.0000 O   0  0  0  0  0  0  0  0  0  0  0  0
   -0.0000   -1.0000    0.0000 P   0  0  0  0  0  0  0  0  0  0  0  0
    0.0000   -2.0000    0.0000 O   0  0  0  0  0  0  0  0  0  0  0  0
   -1.0000   -1.0000    0.0000 O   0  0  0  0  0  0  0  0  0  0  0  0
   -0.0000   -0.0000    0.0000 O   0  0  0  0  0  0  0  0  0  0  0  0
   -0.0000    1.0000    0.0000 P   0  0  0  0  0  0  0  0  0  0  0  0
   -1.0000    1.0000    0.0000 O   0  0  0  0  0  0  0  0  0  0  0  0
   -0.0000    2.0000    0.0000 O   0  0  0  0  0  0  0  0  0  0  0  0
    1.0000    1.0000    0.0000 O   0  0  0  0  0  0  0  0  0  0  0  0
    1.5000    0.1340    0.0000 C   0  0  0  0  0  0  0  0  0  0  0  0
    2.5000    0.1340    0.0000 C   0  0  0  0  0  0  0  0  0  0  0  0
    3.0878   -0.6750    0.0000 O   0  0  0  0  0  0  0  0  0  0  0  0
    4.0388   -0.3660    0.0000 C   0  0  0  0  0  0  0  0  0  0  0  0
    4.8479   -0.9538    0.0000 N   0  0  0  0  0  0  0  0  0  0  0  0
    4.8479   -1.9538    0.0000 C   0  0  0  0  0  0  0  0  0  0  0  0
    5.7989   -2.2628    0.0000 N   0  0  0  0  0  0  0  0  0  0  0  0
    6.3867   -1.4538    0.0000 C   0  0  0  0  0  0  0  0  0  0  0  0
    7.3812   -1.3493    0.0000 C   0  0  0  0  0  0  0  0  0  0  0  0
    7.9690   -2.1583    0.0000 N   0  0  0  0  0  0  0  0  0  0  0  0
    7.7880   -0.4357    0.0000 N   0  0  0  0  0  0  0  0  0  0  0  0
    7.2002    0.3733    0.0000 C   0  0  0  0  0  0  0  0  0  0  0  0
    6.2057    0.2688    0.0000 N   0  0  0  0  0  0  0  0  0  0  0  0
    5.7989   -0.6448    0.0000 C   0  0  0  0  0  0  0  0  0  0  0  0
    4.0388    0.6340    0.0000 C   0  0  0  0  0  0  0  0  0  0  0  0
    4.8479    1.2218    0.0000 O   0  0  0  0  0  0  0  0  0  0  0  0
    3.0878    0.9430    0.0000 C   0  0  0  0  0  0  0  0  0  0  0  0
    2.7788    1.8940    0.0000 O   0  0  0  0  0  0  0  0  0  0  0  0
   -1.5000   -5.3301    0.0000 C   0  0  0  0  0  0  0  0  0  0  0  0
   -2.0000   -4.4641    0.0000 C   0  0  0  0  0  0  0  0  0  0  0  0
   -3.0000   -4.4641    0.0000 C   0  0  0  0  0  0  0  0  0  0  0  0
   -3.5000   -3.5981    0.0000 C   0  0  0  0  0  0  0  0  0  0  0  0
  1  2  1  0
  2  3  2  0
  3  4  1  0
  4  5  1  0
  5  6  2  0
  6  7  1  0
  7  8  2  0
  7  9  1  0
  9 10  1  0
 10 11  2  0
 10 12  1  0
 12 13  2  0
 13 14  1  0
 13  6  1  0
 14 15  1  0
 14 50  1  0
 15 16  1  0
 16 17  1  0
 16 18  1  0
 18 19  1  0
 18 20  1  0
 20 21  1  0
 20 22  1  0
 22 23  1  0
 23 24  1  0
 24 25  2  0
 24 26  1  0
 24 27  1  0
 27 28  1  0
 28 29  2  0
 28 30  1  0
 28 31  1  0
 31 32  1  0
 32 33  1  0
 33 34  1  0
 34 35  1  0
 35 36  1  0
 35 46  1  0
 36 37  1  0
 37 38  2  0
 38 39  1  0
 39 40  2  0
 40 41  1  0
 40 42  1  0
 42 43  2  0
 43 44  1  0
 44 45  2  0
 45 36  1  0
 45 39  1  0
 46 47  1  0
 46 48  1  0
 48 49  1  0
 48 33  1  0
 50 51  1  0
 50  4  2  0
 51 52  2  0
 52 53  1  0
 52  2  1  0
M  END
>  <group_A>  (59) 
1

>  <group_B>  (59) 
1

>  <group_C>  (59) 
1

>  <group_D>  (59) 
1

>  <group_G>  (59) 
1

>  <group_H>  (59) 
0

>  <group_J>  (59) 
1

>  <group_L>  (59) 
1

>  <group_M>  (59) 
1

>  <group_N>  (59) 
1

>  <group_P>  (59) 
1

>  <group_R>  (59) 
1

>  <group_S>  (59) 
1

>  <group_V>  (59) 
1

$$$$

     RDKit          2D

  2  1  0  0  0  0  0  0  0  0999 V2000
    1.0000   -0.0000    0.0000 O   0  0  0  0  0  0  0  0  0  0  0  0
   -0.0000   -0.0000    0.0000 O   0  0  0  0  0  0  0  0  0  0  0  0
  1  2  1  0
M  CHG  2   1  -1   2  -1
M  END
>  <group_A>  (60) 
1

>  <group_B>  (60) 
1

>  <group_C>  (60) 
1

>  <group_D>  (60) 
0

>  <group_G>  (60) 
1

>  <group_H>  (60) 
0

>  <group_J>  (60) 
0

>  <group_L>  (60) 
0

>  <group_M>  (60) 
0

>  <group_N>  (60) 
0

>  <group_P>  (60) 
0

>  <group_R>  (60) 
0

>  <group_S>  (60) 
1

>  <group_V>  (60) 
1

$$$$

     RDKit          2D

 27 29  0  0  0  0  0  0  0  0999 V2000
   -7.9690    2.1583    0.0000 N   0  0  0  0  0  0  0  0  0  0  0  0
   -7.3812    1.3493    0.0000 C   0  0  0  0  0  0  0  0  0  0  0  0
   -7.7880    0.4357    0.0000 N   0  0  0  0  0  0  0  0  0  0  0  0
   -7.2002   -0.3733    0.0000 C   0  0  0  0  0  0  0  0  0  0  0  0
   -6.2057   -0.2688    0.0000 N   0  0  0  0  0  0  0  0  0  0  0  0
   -5.7989    0.6448    0.0000 C   0  0  0  0  0  0  0  0  0  0  0  0
   -6.3867    1.4538    0.0000 C   0  0  0  0  0  0  0  0  0  0  0  0
   -5.7989    2.2628    0.0000 N   0  0  0  0  0  0  0  0  0  0  0  0
   -4.8479    1.9538    0.0000 C   0  0  0  0  0  0  0  0  0  0  0  0
   -4.8479    0.9538    0.0000 N   0  0  0  0  0  0  0  0  0  0  0  0
   -4.0388    0.3660    0.0000 C   0  0  0  0  0  0  0  0  0  0  0  0
   -3.0878    0.6750    0.0000 O   0  0  0  0  0  0  0  0  0  0  0  0
   -2.5000   -0.1340    0.0000 C   0  0  0  0  0  0  0  0  0  0  0  0
   -1.5000   -0.1340    0.0000 C   0  0  0  0  0  0  0  0  0  0  0  0
   -1.0000   -1.0000    0.0000 O   0  0  0  0  0  0  0  0  0  0  0  0
   -0.0000   -1.0000    0.0000 P   0  0  0  0  0  0  0  0  0  0  0  0
   -0.0000   -2.0000    0.0000 O   0  0  0  0  0  0  0  0  0  0  0  0
    1.0000   -1.0000    0.0000 O   0  0  0  0  0  0  0  0  0  0  0  0
    0.0000    0.0000    0.0000 O   0  0  0  0  0  0  0  0  0  0  0  0
   -0.0000    1.0000    0.0000 P   0  0  0  0  0  0  0  0  0  0  0  0
    1.0000    1.0000    0.0000 O   0  0  0  0  0  0  0  0  0  0  0  0
   -0.0000    2.0000    0.0000 O   0  0  0  0  0  0  0  0  0  0  0  0
   -1.0000    1.0000    0.0000 O   0  0  0  0  0  0  0  0  0  0  0  0
   -3.0878   -0.9430    0.0000 C   0  0  0  0  0  0  0  0  0  0  0  0
   -2.7788   -1.8940    0.0000 O   0  0  0  0  0  0  0  0  0  0  0  0
   -4.0388   -0.6340    0.0000 C   0  0  0  0  0  0  0  0  0  0  0  0
   -4.8479   -1.2218    0.0000 O   0  0  0  0  0  0  0  0  0  0  0  0
  1  2  1  0
  2  3  2  0
  3  4  1  0
  4  5  2  0
  5  6  1  0
  6  7  2  0
  7  8  1  0
  7  2  1  0
  8  9  2  0
  9 10  1  0
 10 11  1  0
 10  6  1  0
 11 12  1  0
 12 13  1  0
 13 14  1  0
 13 24  1  0
 14 15  1  0
 15 16  1  0
 16 17  2  0
 16 18  1  0
 16 19  1  0
 19 20  1  0
 20 21  2  0
 20 22  1  0
 20 23  1  0
 24 25  1  0
 24 26  1  0
 26 27  1  0
 26 11  1  0
M  END
>  <group_A>  (61) 
1

>  <group_B>  (61) 
1

>  <group_C>  (61) 
1

>  <group_D>  (61) 
1

>  <group_G>  (61) 
1

>  <group_H>  (61) 
0

>  <group_J>  (61) 
1

>  <group_L>  (61) 
1

>  <group_M>  (61) 
1

>  <group_N>  (61) 
0

>  <group_P>  (61) 
0

>  <group_R>  (61) 
0

>  <group_S>  (61) 
1

>  <group_V>  (61) 
1

$$$$

     RDKit          2D

 10  9  0  0  0  0  0  0  0  0999 V2000
    3.4641    0.0000    0.0000 N   0  0  0  0  0  0  0  0  0  0  0  0
    3.4641    1.0000    0.0000 C   0  0  0  0  0  0  0  0  0  0  0  0
    4.3301    1.5000    0.0000 O   0  0  0  0  0  0  0  0  0  0  0  0
    2.5981    1.5000    0.0000 C   0  0  0  0  0  0  0  0  0  0  0  0
    1.7321    1.0000    0.0000 C   0  0  0  0  0  0  0  0  0  0  0  0
    0.8660    1.5000    0.0000 C   0  0  0  0  0  0  0  0  0  0  0  0
    0.8660    2.5000    0.0000 N   0  0  0  0  0  0  0  0  0  0  0  0
   -0.0000    1.0000    0.0000 C   0  0  0  0  0  0  0  0  0  0  0  0
   -0.8660    1.5000    0.0000 O   0  0  0  0  0  0  0  0  0  0  0  0
   -0.0000   -0.0000    0.0000 O   0  0  0  0  0  0  0  0  0  0  0  0
  1  2  1  0
  2  3  2  0
  2  4  1  0
  4  5  1  0
  5  6  1  0
  6  7  1  0
  6  8  1  0
  8  9  2  0
  8 10  1  0
M  END
>  <group_A>  (62) 
1

>  <group_B>  (62) 
1

>  <group_C>  (62) 
0

>  <group_D>  (62) 
0

>  <group_G>  (62) 
0

>  <group_H>  (62) 
0

>  <group_J>  (62) 
0

>  <group_L>  (62) 
0

>  <group_M>  (62) 
0

>  <group_N>  (62) 
0

>  <group_P>  (62) 
0

>  <group_R>  (62) 
0

>  <group_S>  (62) 
0

>  <group_V>  (62) 
0

$$$$

     RDKit          2D

  1  0  0  0  0  0  0  0  0  0999 V2000
    1.0000    0.0000    0.0000 Mn  0  0  0  0  0 15  0  0  0  0  0  0
M  CHG  1   1   2
M  END
>  <group_A>  (63) 
1

>  <group_B>  (63) 
1

>  <group_C>  (63) 
1

>  <group_D>  (63) 
1

>  <group_G>  (63) 
1

>  <group_H>  (63) 
0

>  <group_J>  (63) 
1

>  <group_L>  (63) 
1

>  <group_M>  (63) 
1

>  <group_N>  (63) 
1

>  <group_P>  (63) 
0

>  <group_R>  (63) 
0

>  <group_S>  (63) 
1

>  <group_V>  (63) 
1

$$$$

     RDKit          2D

  9  8  0  0  0  0  0  0  0  0999 V2000
    3.4641   -0.0000    0.0000 N   0  0  0  0  0  0  0  0  0  0  0  0
    3.4641    1.0000    0.0000 C   0  0  0  0  0  0  0  0  0  0  0  0
    2.5981    1.5000    0.0000 C   0  0  0  0  0  0  0  0  0  0  0  0
    1.7321    1.0000    0.0000 C   0  0  0  0  0  0  0  0  0  0  0  0
    0.8660    1.5000    0.0000 C   0  0  0  0  0  0  0  0  0  0  0  0
    0.8660    2.5000    0.0000 N   0  0  0  0  0  0  0  0  0  0  0  0
   -0.0000    1.0000    0.0000 C   0  0  0  0  0  0  0  0  0  0  0  0
   -0.8660    1.5000    0.0000 O   0  0  0  0  0  0  0  0  0  0  0  0
   -0.0000   -0.0000    0.0000 O   0  0  0  0  0  0  0  0  0  0  0  0
  1  2  1  0
  2  3  1  0
  3  4  1  0
  4  5  1  0
  5  6  1  0
  5  7  1  0
  7  8  2  0
  7  9  1  0
M  END
>  <group_A>  (64) 
1

>  <group_B>  (64) 
0

>  <group_C>  (64) 
0

>  <group_D>  (64) 
0

>  <group_G>  (64) 
0

>  <group_H>  (64) 
0

>  <group_J>  (64) 
0

>  <group_L>  (64) 
0

>  <group_M>  (64) 
0

>  <group_N>  (64) 
0

>  <group_P>  (64) 
0

>  <group_R>  (64) 
0

>  <group_S>  (64) 
0

>  <group_V>  (64) 
0

$$$$

     RDKit          2D

 32 34  0  0  0  0  0  0  0  0999 V2000
    7.6069   -0.7132    0.0000 N   0  0  0  0  0  0  0  0  0  0  0  0
    7.2002   -1.6267    0.0000 C   0  0  0  0  0  0  0  0  0  0  0  0
    6.2057   -1.7312    0.0000 N   0  0  0  0  0  0  0  0  0  0  0  0
    5.7989   -2.6448    0.0000 C   0  0  0  0  0  0  0  0  0  0  0  0
    6.3867   -3.4538    0.0000 C   0  0  0  0  0  0  0  0  0  0  0  0
    5.7989   -4.2628    0.0000 N   0  0  0  0  0  0  0  0  0  0  0  0
    4.8479   -3.9538    0.0000 C   0  0  0  0  0  0  0  0  0  0  0  0
    4.8479   -2.9538    0.0000 N   0  0  0  0  0  0  0  0  0  0  0  0
    4.0388   -2.3660    0.0000 C   0  0  0  0  0  0  0  0  0  0  0  0
    3.0878   -2.6750    0.0000 O   0  0  0  0  0  0  0  0  0  0  0  0
    2.5000   -1.8660    0.0000 C   0  0  0  0  0  0  0  0  0  0  0  0
    1.5000   -1.8660    0.0000 C   0  0  0  0  0  0  0  0  0  0  0  0
    1.0000   -1.0000    0.0000 O   0  0  0  0  0  0  0  0  0  0  0  0
   -0.0000   -1.0000    0.0000 P   0  0  0  0  0  0  0  0  0  0  0  0
   -0.0000   -2.0000    0.0000 O   0  0  0  0  0  0  0  0  0  0  0  0
   -1.0000   -1.0000    0.0000 O   0  0  0  0  0  0  0  0  0  0  0  0
    0.0000   -0.0000    0.0000 O   0  0  0  0  0  0  0  0  0  0  0  0
    0.0000    1.0000    0.0000 P   0  0  0  0  0  0  0  0  0  0  0  0
   -1.0000    1.0000    0.0000 O   0  0  0  0  0  0  0  0  0  0  0  0
    0.0000    2.0000    0.0000 O   0  0  0  0  0  0  0  0  0  0  0  0
    1.0000    1.0000    0.0000 O   0  0  0  0  0  0  0  0  0  0  0  0
    2.0000    1.0000    0.0000 P   0  0  0  0  0  0  0  0  0  0  0  0
    2.0000    2.0000    0.0000 O   0  0  0  0  0  0  0  0  0  0  0  0
    3.0000    1.0000    0.0000 O   0  0  0  0  0  0  0  0  0  0  0  0
    2.0000   -0.0000    0.0000 O   0  0  0  0  0  0  0  0  0  0  0  0
    3.0878   -1.0570    0.0000 C   0  0  0  0  0  0  0  0  0  0  0  0
    2.7788   -0.1060    0.0000 O   0  0  0  0  0  0  0  0  0  0  0  0
    4.0388   -1.3660    0.0000 C   0  0  0  0  0  0  0  0  0  0  0  0
    4.8479   -0.7782    0.0000 O   0  0  0  0  0  0  0  0  0  0  0  0
    7.3812   -3.3493    0.0000 C   0  0  0  0  0  0  0  0  0  0  0  0
    7.9690   -4.1583    0.0000 O   0  0  0  0  0  0  0  0  0  0  0  0
    7.7880   -2.4357    0.0000 N   0  0  0  0  0  0  0  0  0  0  0  0
  1  2  1  0
  2  3  2  0
  3  4  1  0
  4  5  2  0
  5  6  1  0
  5 30  1  0
  6  7  2  0
  7  8  1  0
  8  9  1  0
  8  4  1  0
  9 10  1  0
 10 11  1  0
 11 12  1  0
 11 26  1  0
 12 13  1  0
 13 14  1  0
 14 15  2  0
 14 16  1  0
 14 17  1  0
 17 18  1  0
 18 19  2  0
 18 20  1  0
 18 21  1  0
 21 22  1  0
 22 23  2  0
 22 24  1  0
 22 25  1  0
 26 27  1  0
 26 28  1  0
 28 29  1  0
 28  9  1  0
 30 31  2  0
 30 32  1  0
 32  2  1  0
M  END
>  <group_A>  (65) 
1

>  <group_B>  (65) 
1

>  <group_C>  (65) 
0

>  <group_D>  (65) 
1

>  <group_G>  (65) 
1

>  <group_H>  (65) 
0

>  <group_J>  (65) 
0

>  <group_L>  (65) 
1

>  <group_M>  (65) 
1

>  <group_N>  (65) 
0

>  <group_P>  (65) 
0

>  <group_R>  (65) 
0

>  <group_S>  (65) 
1

>  <group_V>  (65) 
0

$$$$

     RDKit          2D

 31 34  0  0  0  0  0  0  0  0999 V2000
    2.8147    1.2024    0.0000 O   0  0  0  0  0  0  0  0  0  0  0  0
    1.9487    1.7024    0.0000 C   0  0  0  0  0  0  0  0  0  0  0  0
    1.9487    2.7024    0.0000 N   0  0  0  0  0  0  0  0  0  0  0  0
    2.8147    3.2024    0.0000 C   0  0  0  0  0  0  0  0  0  0  0  0
    2.8147    4.2024    0.0000 C   0  0  0  0  0  0  0  0  0  0  0  0
    1.9487    4.7024    0.0000 C   0  0  0  0  0  0  0  0  0  0  0  0
    1.9487    5.7024    0.0000 C   0  0  0  0  0  0  0  0  0  0  0  0
    1.0827    6.2024    0.0000 C   0  0  0  0  0  0  0  0  0  0  0  0
    0.2167    5.7024    0.0000 C   0  0  0  0  0  0  0  0  0  0  0  0
   -0.6494    6.2024    0.0000 F   0  0  0  0  0  0  0  0  0  0  0  0
    0.2167    4.7024    0.0000 C   0  0  0  0  0  0  0  0  0  0  0  0
    1.0827    4.2024    0.0000 C   0  0  0  0  0  0  0  0  0  0  0  0
    3.6808    2.7024    0.0000 C   0  0  0  0  0  0  0  0  0  0  0  0
    3.6808    1.7024    0.0000 O   0  0  0  0  0  0  0  0  0  0  0  0
    4.5468    3.2024    0.0000 N   0  0  0  0  0  0  0  0  0  0  0  0
    4.5468    4.2024    0.0000 C   0  0  0  0  0  0  0  0  0  0  0  0
    5.4128    4.7024    0.0000 C   0  0  0  0  0  0  0  0  0  0  0  0
    6.2788    4.2024    0.0000 C   0  0  0  0  0  0  0  0  0  0  0  0
    7.1449    4.7024    0.0000 O   0  0  0  0  0  0  0  0  0  0  0  0
    6.2788    3.2024    0.0000 C   0  0  0  0  0  0  0  0  0  0  0  0
    5.4128    2.7024    0.0000 C   0  0  0  0  0  0  0  0  0  0  0  0
    1.0827    1.2024    0.0000 C   0  0  0  0  0  0  0  0  0  0  0  0
    0.9781    0.2079    0.0000 C   0  0  0  0  0  0  0  0  0  0  0  0
   -0.0000   -0.0000    0.0000 C   0  0  0  0  0  0  0  0  0  0  0  0
   -0.5000   -0.8660    0.0000 C   0  0  0  0  0  0  0  0  0  0  0  0
   -1.5000   -0.8660    0.0000 C   0  0  0  0  0  0  0  0  0  0  0  0
   -2.0000   -1.7321    0.0000 Cl  0  0  0  0  0  0  0  0  0  0  0  0
   -2.0000    0.0000    0.0000 C   0  0  0  0  0  0  0  0  0  0  0  0
   -1.5000    0.8660    0.0000 C   0  0  0  0  0  0  0  0  0  0  0  0
   -0.5000    0.8660    0.0000 C   0  0  0  0  0  0  0  0  0  0  0  0
    0.1691    1.6092    0.0000 N   0  0  0  0  0  0  0  0  0  0  0  0
  1  2  2  0
  2  3  1  0
  2 22  1  0
  3  4  1  0
  4  5  1  0
  4 13  1  0
  5  6  1  0
  6  7  2  0
  7  8  1  0
  8  9  2  0
  9 10  1  0
  9 11  1  0
 11 12  2  0
 12  6  1  0
 13 14  2  0
 13 15  1  0
 15 16  1  0
 16 17  1  0
 17 18  1  0
 18 19  1  0
 18 20  1  0
 20 21  1  0
 21 15  1  0
 22 23  2  0
 23 24  1  0
 24 25  2  0
 25 26  1  0
 26 27  1  0
 26 28  2  0
 28 29  1  0
 29 30  2  0
 30 31  1  0
 30 24  1  0
 31 22  1  0
M  END
>  <group_A>  (66) 
1

>  <group_B>  (66) 
0

>  <group_C>  (66) 
0

>  <group_D>  (66) 
0

>  <group_G>  (66) 
0

>  <group_H>  (66) 
0

>  <group_J>  (66) 
0

>  <group_L>  (66) 
0

>  <group_M>  (66) 
0

>  <group_N>  (66) 
0

>  <group_P>  (66) 
0

>  <group_R>  (66) 
0

>  <group_S>  (66) 
0

>  <group_V>  (66) 
0

$$$$

     RDKit          2D

 28 29  0  0  0  0  0  0  0  0999 V2000
    5.0229    1.9333    0.0000 C   0  0  0  0  0  0  0  0  0  0  0  0
    4.1858    2.4167    0.0000 C   0  0  0  0  0  0  0  0  0  0  0  0
    3.3486    1.9333    0.0000 N   0  0  0  0  0  0  0  0  0  0  0  0
    3.3486    0.9667    0.0000 C   0  0  0  0  0  0  0  0  0  0  0  0
    4.1858    0.4833    0.0000 C   0  0  0  0  0  0  0  0  0  0  0  0
    2.5115    0.4833    0.0000 C   0  0  0  0  0  0  0  0  0  0  0  0
    2.5115   -0.4833    0.0000 C   0  0  0  0  0  0  0  0  0  0  0  0
    1.6743   -0.9667    0.0000 O   0  0  0  0  0  0  0  0  0  0  0  0
    3.3486   -0.9667    0.0000 O   0  0  0  0  0  0  0  0  0  0  0  0
    3.3486   -1.9333    0.0000 C   0  0  0  0  0  0  0  0  0  0  0  0
    2.5115   -2.4167    0.0000 C   0  0  0  0  0  0  0  0  0  0  0  0
    4.1858   -2.4167    0.0000 C   0  0  0  0  0  0  0  0  0  0  0  0
    1.6743    0.9667    0.0000 C   0  0  0  0  0  0  0  0  0  0  0  0
   -0.0000   -0.0000    0.0000 C   0  0  0  0  0  0  0  0  0  0  0  0
    0.0000   -0.9667    0.0000 C   0  0  0  0  0  0  0  0  0  0  0  0
   -0.8372   -1.4500    0.0000 C   0  0  0  0  0  0  0  0  0  0  0  0
   -1.6743   -0.9667    0.0000 C   0  0  0  0  0  0  0  0  0  0  0  0
   -1.6743   -0.0000    0.0000 C   0  0  0  0  0  0  0  0  0  0  0  0
   -0.8372    0.4833    0.0000 C   0  0  0  0  0  0  0  0  0  0  0  0
   -0.8372    1.4500    0.0000 Cl  0  0  0  0  0  0  0  0  0  0  0  0
    1.6743    1.9333    0.0000 C   0  0  0  0  0  0  0  0  0  0  0  0
    0.8372    2.4167    0.0000 C   0  0  0  0  0  0  0  0  0  0  0  0
    0.8372    3.3833    0.0000 O   0  0  0  0  0  0  0  0  0  0  0  0
   -0.0000    1.9333    0.0000 O   0  0  0  0  0  0  0  0  0  0  0  0
    2.5115    2.4167    0.0000 C   0  0  0  0  0  0  0  0  0  0  0  0
    2.5115    3.3833    0.0000 C   0  0  0  0  0  0  0  0  0  0  0  0
    3.3486    3.8667    0.0000 O   0  0  0  0  0  0  0  0  0  0  0  0
    1.6743    3.8667    0.0000 O   0  0  0  0  0  0  0  0  0  0  0  0
  1  2  1  0
  2  3  1  0
  3  4  2  0
  4  5  1  0
  4  6  1  0
  6  7  1  0
  6 13  2  0
  7  8  2  0
  7  9  1  0
  9 10  1  0
 10 11  1  0
 10 12  1  0
 13 14  1  0
 13 21  1  0
 14 15  2  0
 15 16  1  0
 16 17  2  0
 17 18  1  0
 18 19  2  0
 19 20  1  0
 19 14  1  0
 21 22  1  0
 21 25  2  0
 22 23  2  0
 22 24  1  0
 25 26  1  0
 25  3  1  0
 26 27  2  0
 26 28  1  0
M  CHG  1   3   1
M  END
>  <group_A>  (67) 
1

>  <group_B>  (67) 
0

>  <group_C>  (67) 
0

>  <group_D>  (67) 
0

>  <group_G>  (67) 
0

>  <group_H>  (67) 
0

>  <group_J>  (67) 
0

>  <group_L>  (67) 
0

>  <group_M>  (67) 
0

>  <group_N>  (67) 
0

>  <group_P>  (67) 
0

>  <group_R>  (67) 
0

>  <group_S>  (67) 
0

>  <group_V>  (67) 
0

$$$$

     RDKit          2D

 14 15  0  0  0  0  0  0  0  0999 V2000
    2.5981    0.5000    0.0000 C   0  0  0  0  0  0  0  0  0  0  0  0
    1.7321    0.0000    0.0000 N   0  0  0  0  0  0  0  0  0  0  0  0
    0.8660    0.5000    0.0000 C   0  0  0  0  0  0  0  0  0  0  0  0
    0.8660    1.5000    0.0000 O   0  0  0  0  0  0  0  0  0  0  0  0
    0.0000   -0.0000    0.0000 C   0  0  0  0  0  0  0  0  0  0  0  0
    0.0000   -1.0000    0.0000 C   0  0  0  0  0  0  0  0  0  0  0  0
   -0.9511   -1.3090    0.0000 N   0  0  0  0  0  0  0  0  0  0  0  0
   -1.5388   -0.5000    0.0000 C   0  0  0  0  0  0  0  0  0  0  0  0
   -0.9511    0.3090    0.0000 N   0  0  0  0  0  0  0  0  0  0  0  0
   -1.2601    1.2601    0.0000 C   0  0  0  0  0  0  0  0  0  0  0  0
    0.8660   -1.5000    0.0000 N   0  0  0  0  0  0  0  0  0  0  0  0
    0.8660   -2.5000    0.0000 C   0  0  0  0  0  0  0  0  0  0  0  0
    1.7321   -1.0000    0.0000 C   0  0  0  0  0  0  0  0  0  0  0  0
    2.5981   -1.5000    0.0000 O   0  0  0  0  0  0  0  0  0  0  0  0
  1  2  1  0
  2  3  1  0
  3  4  2  0
  3  5  1  0
  5  6  2  0
  6  7  1  0
  6 11  1  0
  7  8  2  0
  8  9  1  0
  9 10  1  0
  9  5  1  0
 11 12  1  0
 11 13  1  0
 13 14  2  0
 13  2  1  0
M  END
>  <group_A>  (68) 
1

>  <group_B>  (68) 
0

>  <group_C>  (68) 
0

>  <group_D>  (68) 
0

>  <group_G>  (68) 
0

>  <group_H>  (68) 
0

>  <group_J>  (68) 
0

>  <group_L>  (68) 
0

>  <group_M>  (68) 
0

>  <group_N>  (68) 
1

>  <group_P>  (68) 
0

>  <group_R>  (68) 
0

>  <group_S>  (68) 
0

>  <group_V>  (68) 
0

$$$$

     RDKit          2D

 11 10  0  0  0  0  0  0  0  0999 V2000
   -3.0000   -2.7321    0.0000 N   0  0  0  0  0  0  0  0  0  0  0  0
   -2.5000   -1.8660    0.0000 C   0  0  0  0  0  0  0  0  0  0  0  0
   -1.5000   -1.8660    0.0000 C   0  0  0  0  0  0  0  0  0  0  0  0
   -1.0000   -1.0000    0.0000 O   0  0  0  0  0  0  0  0  0  0  0  0
    0.0000   -1.0000    0.0000 P   0  0  0  0  0  0  0  0  0  0  0  0
   -0.0000   -2.0000    0.0000 O   0  0  0  0  0  0  0  0  0  0  0  0
    1.0000   -1.0000    0.0000 O   0  0  0  0  0  0  0  0  0  0  0  0
    0.0000    0.0000    0.0000 O   0  0  0  0  0  0  0  0  0  0  0  0
   -3.0000   -1.0000    0.0000 C   0  0  0  0  0  0  0  0  0  0  0  0
   -2.5000   -0.1340    0.0000 O   0  0  0  0  0  0  0  0  0  0  0  0
   -4.0000   -1.0000    0.0000 O   0  0  0  0  0  0  0  0  0  0  0  0
  1  2  1  0
  2  3  1  0
  2  9  1  0
  3  4  1  0
  4  5  1  0
  5  6  2  0
  5  7  1  0
  5  8  1  0
  9 10  2  0
  9 11  1  0
M  END
>  <group_A>  (69) 
1

>  <group_B>  (69) 
1

>  <group_C>  (69) 
1

>  <group_D>  (69) 
1

>  <group_G>  (69) 
1

>  <group_H>  (69) 
0

>  <group_J>  (69) 
0

>  <group_L>  (69) 
1

>  <group_M>  (69) 
1

>  <group_N>  (69) 
1

>  <group_P>  (69) 
0

>  <group_R>  (69) 
0

>  <group_S>  (69) 
1

>  <group_V>  (69) 
1

$$$$

     RDKit          2D

 24 26  0  0  0  0  0  0  0  0999 V2000
    3.4641    1.0000    0.0000 O   0  0  0  0  0  0  0  0  0  0  0  0
    2.5981    1.5000    0.0000 C   0  0  0  0  0  0  0  0  0  0  0  0
    2.5981    2.5000    0.0000 O   0  0  0  0  0  0  0  0  0  0  0  0
    1.7321    1.0000    0.0000 C   0  0  0  0  0  0  0  0  0  0  0  0
    0.8660    1.5000    0.0000 C   0  0  0  0  0  0  0  0  0  0  0  0
    0.0000    1.0000    0.0000 C   0  0  0  0  0  0  0  0  0  0  0  0
   -0.8660    1.5000    0.0000 C   0  0  0  0  0  0  0  0  0  0  0  0
   -0.8660    2.5000    0.0000 O   0  0  0  0  0  0  0  0  0  0  0  0
   -1.7321    1.0000    0.0000 O   0  0  0  0  0  0  0  0  0  0  0  0
    0.0000    0.0000    0.0000 C   0  0  0  0  0  0  0  0  0  0  0  0
    0.8660   -0.5000    0.0000 C   0  0  0  0  0  0  0  0  0  0  0  0
    1.7321    0.0000    0.0000 N   0  0  0  0  0  0  0  0  0  0  0  0
    0.8660   -1.5000    0.0000 C   0  0  0  0  0  0  0  0  0  0  0  0
    1.7321   -2.0000    0.0000 O   0  0  0  0  0  0  0  0  0  0  0  0
    0.0000   -2.0000    0.0000 C   0  0  0  0  0  0  0  0  0  0  0  0
    0.0000   -3.0000    0.0000 O   0  0  0  0  0  0  0  0  0  0  0  0
   -0.8660   -1.5000    0.0000 C   0  0  0  0  0  0  0  0  0  0  0  0
   -1.8171   -1.8090    0.0000 C   0  0  0  0  0  0  0  0  0  0  0  0
   -2.4049   -1.0000    0.0000 C   0  0  0  0  0  0  0  0  0  0  0  0
   -3.4049   -1.0000    0.0000 C   0  0  0  0  0  0  0  0  0  0  0  0
   -3.9049   -0.1340    0.0000 O   0  0  0  0  0  0  0  0  0  0  0  0
   -3.9049   -1.8660    0.0000 O   0  0  0  0  0  0  0  0  0  0  0  0
   -1.8171   -0.1910    0.0000 N   0  0  0  0  0  0  0  0  0  0  0  0
   -0.8660   -0.5000    0.0000 C   0  0  0  0  0  0  0  0  0  0  0  0
  1  2  2  0
  2  3  1  0
  2  4  1  0
  4  5  2  0
  5  6  1  0
  6  7  1  0
  6 10  2  0
  7  8  2  0
  7  9  1  0
 10 11  1  0
 11 12  2  0
 11 13  1  0
 12  4  1  0
 13 14  2  0
 13 15  1  0
 15 16  2  0
 15 17  1  0
 17 18  1  0
 18 19  2  0
 19 20  1  0
 19 23  1  0
 20 21  2  0
 20 22  1  0
 23 24  1  0
 24 17  2  0
 24 10  1  0
M  END
>  <group_A>  (70) 
1

>  <group_B>  (70) 
0

>  <group_C>  (70) 
0

>  <group_D>  (70) 
0

>  <group_G>  (70) 
0

>  <group_H>  (70) 
0

>  <group_J>  (70) 
0

>  <group_L>  (70) 
0

>  <group_M>  (70) 
0

>  <group_N>  (70) 
0

>  <group_P>  (70) 
0

>  <group_R>  (70) 
0

>  <group_S>  (70) 
0

>  <group_V>  (70) 
0

$$$$

     RDKit          2D

 13 13  0  0  0  0  0  0  0  0999 V2000
   -0.8660   -1.5000    0.0000 O   0  0  0  0  0  0  0  0  0  0  0  0
    0.0000   -1.0000    0.0000 C   0  0  0  0  0  0  0  0  0  0  0  0
    0.8660   -1.5000    0.0000 O   0  0  0  0  0  0  0  0  0  0  0  0
    0.0000    0.0000    0.0000 C   0  0  0  0  0  0  0  0  0  0  0  0
   -0.8660    0.5000    0.0000 O   0  0  0  0  0  0  0  0  0  0  0  0
   -0.8660    1.5000    0.0000 C   0  0  0  0  0  0  0  0  0  0  0  0
   -1.7321    2.0000    0.0000 O   0  0  0  0  0  0  0  0  0  0  0  0
   -0.0000    2.0000    0.0000 C   0  0  0  0  0  0  0  0  0  0  0  0
   -0.0000    3.0000    0.0000 O   0  0  0  0  0  0  0  0  0  0  0  0
    0.8660    1.5000    0.0000 C   0  0  0  0  0  0  0  0  0  0  0  0
    1.7321    2.0000    0.0000 O   0  0  0  0  0  0  0  0  0  0  0  0
    0.8660    0.5000    0.0000 C   0  0  0  0  0  0  0  0  0  0  0  0
    1.7321    0.0000    0.0000 O   0  0  0  0  0  0  0  0  0  0  0  0
  1  2  2  0
  2  3  1  0
  2  4  1  0
  4  5  1  0
  5  6  1  0
  6  7  1  0
  6  8  1  0
  8  9  1  0
  8 10  1  0
 10 11  1  0
 10 12  1  0
 12 13  1  0
 12  4  1  0
M  END
>  <group_A>  (71) 
1

>  <group_B>  (71) 
1

>  <group_C>  (71) 
1

>  <group_D>  (71) 
0

>  <group_G>  (71) 
0

>  <group_H>  (71) 
0

>  <group_J>  (71) 
0

>  <group_L>  (71) 
0

>  <group_M>  (71) 
0

>  <group_N>  (71) 
0

>  <group_P>  (71) 
0

>  <group_R>  (71) 
0

>  <group_S>  (71) 
0

>  <group_V>  (71) 
1

$$$$

     RDKit          2D

 12 12  0  0  0  0  0  0  0  0999 V2000
   -0.8660   -1.5000    0.0000 C   0  0  0  0  0  0  0  0  0  0  0  0
    0.0000   -1.0000    0.0000 O   0  0  0  0  0  0  0  0  0  0  0  0
    0.0000    0.0000    0.0000 C   0  0  0  0  0  0  0  0  0  0  0  0
   -0.8660    0.5000    0.0000 O   0  0  0  0  0  0  0  0  0  0  0  0
   -0.8660    1.5000    0.0000 C   0  0  0  0  0  0  0  0  0  0  0  0
   -1.7321    2.0000    0.0000 C   0  0  0  0  0  0  0  0  0  0  0  0
   -0.0000    2.0000    0.0000 C   0  0  0  0  0  0  0  0  0  0  0  0
    0.0000    3.0000    0.0000 O   0  0  0  0  0  0  0  0  0  0  0  0
    0.8660    1.5000    0.0000 C   0  0  0  0  0  0  0  0  0  0  0  0
    1.7321    2.0000    0.0000 O   0  0  0  0  0  0  0  0  0  0  0  0
    0.8660    0.5000    0.0000 C   0  0  0  0  0  0  0  0  0  0  0  0
    1.7321    0.0000    0.0000 O   0  0  0  0  0  0  0  0  0  0  0  0
  1  2  1  0
  2  3  1  0
  3  4  1  0
  4  5  1  0
  5  6  1  0
  5  7  1  0
  7  8  1  0
  7  9  1  0
  9 10  1  0
  9 11  1  0
 11 12  1  0
 11  3  1  0
M  END
>  <group_A>  (72) 
1

>  <group_B>  (72) 
0

>  <group_C>  (72) 
0

>  <group_D>  (72) 
0

>  <group_G>  (72) 
0

>  <group_H>  (72) 
0

>  <group_J>  (72) 
0

>  <group_L>  (72) 
0

>  <group_M>  (72) 
0

>  <group_N>  (72) 
0

>  <group_P>  (72) 
0

>  <group_R>  (72) 
0

>  <group_S>  (72) 
0

>  <group_V>  (72) 
0

$$$$

     RDKit          2D

 11 11  0  0  0  0  0  0  0  0999 V2000
   -0.0000   -1.0000    0.0000 C   0  0  0  0  0  0  0  0  0  0  0  0
    0.0000    0.0000    0.0000 C   0  0  0  0  0  0  0  0  0  0  0  0
   -0.8660    0.5000    0.0000 O   0  0  0  0  0  0  0  0  0  0  0  0
   -0.8660    1.5000    0.0000 C   0  0  0  0  0  0  0  0  0  0  0  0
   -1.7321    2.0000    0.0000 O   0  0  0  0  0  0  0  0  0  0  0  0
    0.0000    2.0000    0.0000 C   0  0  0  0  0  0  0  0  0  0  0  0
    0.0000    3.0000    0.0000 O   0  0  0  0  0  0  0  0  0  0  0  0
    0.8660    1.5000    0.0000 C   0  0  0  0  0  0  0  0  0  0  0  0
    1.7321    2.0000    0.0000 O   0  0  0  0  0  0  0  0  0  0  0  0
    0.8660    0.5000    0.0000 C   0  0  0  0  0  0  0  0  0  0  0  0
    1.7321    0.0000    0.0000 O   0  0  0  0  0  0  0  0  0  0  0  0
  1  2  1  0
  2  3  1  0
  3  4  1  0
  4  5  1  0
  4  6  1  0
  6  7  1  0
  6  8  1  0
  8  9  1  0
  8 10  1  0
 10 11  1  0
 10  2  1  0
M  END
>  <group_A>  (73) 
1

>  <group_B>  (73) 
1

>  <group_C>  (73) 
1

>  <group_D>  (73) 
0

>  <group_G>  (73) 
0

>  <group_H>  (73) 
0

>  <group_J>  (73) 
0

>  <group_L>  (73) 
0

>  <group_M>  (73) 
0

>  <group_N>  (73) 
0

>  <group_P>  (73) 
0

>  <group_R>  (73) 
0

>  <group_S>  (73) 
0

>  <group_V>  (73) 
1

$$$$

     RDKit          2D

 10 10  0  0  0  0  0  0  0  0999 V2000
   -0.0000   -1.0000    0.0000 O   0  0  0  0  0  0  0  0  0  0  0  0
    0.0000    0.0000    0.0000 C   0  0  0  0  0  0  0  0  0  0  0  0
   -0.8660    0.5000    0.0000 C   0  0  0  0  0  0  0  0  0  0  0  0
   -0.8660    1.5000    0.0000 O   0  0  0  0  0  0  0  0  0  0  0  0
   -0.0000    2.0000    0.0000 C   0  0  0  0  0  0  0  0  0  0  0  0
   -0.0000    3.0000    0.0000 O   0  0  0  0  0  0  0  0  0  0  0  0
    0.8660    1.5000    0.0000 C   0  0  0  0  0  0  0  0  0  0  0  0
    1.7321    2.0000    0.0000 O   0  0  0  0  0  0  0  0  0  0  0  0
    0.8660    0.5000    0.0000 C   0  0  0  0  0  0  0  0  0  0  0  0
    1.7321    0.0000    0.0000 O   0  0  0  0  0  0  0  0  0  0  0  0
  1  2  1  0
  2  3  1  0
  3  4  1  0
  4  5  1  0
  5  6  1  0
  5  7  1  0
  7  8  1  0
  7  9  1  0
  9 10  1  0
  9  2  1  0
M  END
>  <group_A>  (74) 
1

>  <group_B>  (74) 
1

>  <group_C>  (74) 
1

>  <group_D>  (74) 
0

>  <group_G>  (74) 
1

>  <group_H>  (74) 
0

>  <group_J>  (74) 
0

>  <group_L>  (74) 
0

>  <group_M>  (74) 
0

>  <group_N>  (74) 
0

>  <group_P>  (74) 
0

>  <group_R>  (74) 
0

>  <group_S>  (74) 
1

>  <group_V>  (74) 
1

$$$$

     RDKit          2D

 43 50  0  0  0  0  0  0  0  0999 V2000
    2.4791    2.4454    0.0000 C   0  0  0  0  0  0  0  0  0  0  0  0
    1.5428    2.9384    0.0000 C   0  0  0  0  0  0  0  0  0  0  0  0
    0.6476    2.3741    0.0000 C   0  0  0  0  0  0  0  0  0  0  0  0
    0.4093    2.4693    0.0000 C   0  0  0  0  0  0  0  0  0  0  0  0
    0.1492    3.4950    0.0000 C   0  0  0  0  0  0  0  0  0  0  0  0
    0.2450    2.2720    0.0000 C   0  0  0  0  0  0  0  0  0  0  0  0
   -0.0409    2.0575    0.0000 N   0  0  0  0  0  0  0  0  0  0  0  0
    0.6308    2.1179    0.0000 C   0  0  0  0  0  0  0  0  0  0  0  0
    1.0968    1.6305    0.0000 C   0  0  0  0  0  0  0  0  0  0  0  0
    1.0063    0.9621    0.0000 C   0  0  0  0  0  0  0  0  0  0  0  0
    1.3796    0.1869    0.0000 C   0  0  0  0  0  0  0  0  0  0  0  0
    2.4208   -0.0021    0.0000 C   0  0  0  0  0  0  0  0  0  0  0  0
    0.7577   -0.4077    0.0000 C   0  0  0  0  0  0  0  0  0  0  0  0
    0.8998   -1.4564    0.0000 C   0  0  0  0  0  0  0  0  0  0  0  0
    1.8789   -1.8577    0.0000 C   0  0  0  0  0  0  0  0  0  0  0  0
    2.0210   -2.9063    0.0000 C   0  0  0  0  0  0  0  0  0  0  0  0
    1.1838   -3.5536    0.0000 O   0  0  0  0  0  0  0  0  0  0  0  0
    3.0001   -3.3076    0.0000 O   0  0  0  0  0  0  0  0  0  0  0  0
    0.0000   -0.0000    0.0000 C   0  0  0  0  0  0  0  0  0  0  0  0
    0.1536    0.8466    0.0000 N   0  0  0  0  0  0  0  0  0  0  0  0
   -0.4125    1.4946    0.0000 Fe  0  0  0  0  0  4  0  0  0  0  0  0
   -0.4125    2.5528    0.0000 N   0  0  0  0  0  0  0  0  0  0  0  0
   -1.3289    3.0819    0.0000 C   0  0  0  0  0  0  0  0  0  0  0  0
   -0.8921    3.5239    0.0000 C   0  0  0  0  0  0  0  0  0  0  0  0
   -1.1720    4.5444    0.0000 C   0  0  0  0  0  0  0  0  0  0  0  0
   -0.2909    3.3666    0.0000 C   0  0  0  0  0  0  0  0  0  0  0  0
    0.4529    4.1193    0.0000 C   0  0  0  0  0  0  0  0  0  0  0  0
    1.4767    3.8514    0.0000 C   0  0  0  0  0  0  0  0  0  0  0  0
   -0.1265    2.7673    0.0000 C   0  0  0  0  0  0  0  0  0  0  0  0
    0.2023    2.6269    0.0000 C   0  0  0  0  0  0  0  0  0  0  0  0
   -2.2453    2.5528    0.0000 C   0  0  0  0  0  0  0  0  0  0  0  0
   -2.2453    1.4946    0.0000 C   0  0  0  0  0  0  0  0  0  0  0  0
   -3.0317    0.7865    0.0000 C   0  0  0  0  0  0  0  0  0  0  0  0
   -4.0668    1.0065    0.0000 C   0  0  0  0  0  0  0  0  0  0  0  0
   -2.6013   -0.1802    0.0000 C   0  0  0  0  0  0  0  0  0  0  0  0
   -3.1304   -1.0966    0.0000 C   0  0  0  0  0  0  0  0  0  0  0  0
   -4.1886   -1.0966    0.0000 C   0  0  0  0  0  0  0  0  0  0  0  0
   -4.7177   -2.0130    0.0000 C   0  0  0  0  0  0  0  0  0  0  0  0
   -4.1886   -2.9294    0.0000 O   0  0  0  0  0  0  0  0  0  0  0  0
   -5.7759   -2.0130    0.0000 O   0  0  0  0  0  0  0  0  0  0  0  0
   -1.5489   -0.0696    0.0000 C   0  0  0  0  0  0  0  0  0  0  0  0
   -1.3289    0.9655    0.0000 N   0  0  0  0  0  0  0  0  0  0  0  0
   -0.7577   -0.4077    0.0000 C   0  0  0  0  0  0  0  0  0  0  0  0
  1  2  1  0
  2  3  2  3
  3  4  1  0
  4  5  1  0
  4  6  2  0
  6  7  1  0
  7  8  1  0
  8  9  2  0
  8  3  1  0
  9 10  1  0
 10 11  2  0
 11 12  1  0
 11 13  1  0
 13 14  1  0
 13 19  2  0
 14 15  1  0
 15 16  1  0
 16 17  2  0
 16 18  1  0
 19 20  1  0
 20 21  1  0
 20 10  1  0
 21 22  1  0
 21  7  1  0
 22 23  1  0
 23 24  2  0
 23 31  1  0
 24 25  1  0
 24 26  1  0
 26 27  2  3
 26 29  1  0
 27 28  1  0
 29 30  2  0
 29 22  1  0
 30  6  1  0
 31 32  2  0
 32 33  1  0
 33 34  1  0
 33 35  2  0
 35 36  1  0
 35 41  1  0
 36 37  1  0
 37 38  1  0
 38 39  2  0
 38 40  1  0
 41 42  1  0
 41 43  2  0
 42 21  1  0
 42 32  1  0
 43 19  1  0
M  END
>  <group_A>  (75) 
1

>  <group_B>  (75) 
0

>  <group_C>  (75) 
0

>  <group_D>  (75) 
0

>  <group_G>  (75) 
1

>  <group_H>  (75) 
0

>  <group_J>  (75) 
0

>  <group_L>  (75) 
0

>  <group_M>  (75) 
0

>  <group_N>  (75) 
0

>  <group_P>  (75) 
0

>  <group_R>  (75) 
0

>  <group_S>  (75) 
1

>  <group_V>  (75) 
1

$$$$

     RDKit          2D

 21 24  0  0  0  0  0  0  0  0999 V2000
    2.1913   -3.4135    0.0000 C   0  0  0  0  0  0  0  0  0  0  0  0
    2.5981   -2.5000    0.0000 C   0  0  0  0  0  0  0  0  0  0  0  0
    1.7321   -3.0000    0.0000 C   0  0  0  0  0  0  0  0  0  0  0  0
    0.8660   -2.5000    0.0000 C   0  0  0  0  0  0  0  0  0  0  0  0
    0.8660   -1.5000    0.0000 C   0  0  0  0  0  0  0  0  0  0  0  0
    1.7321   -1.0000    0.0000 C   0  0  0  0  0  0  0  0  0  0  0  0
    1.7321    0.0000    0.0000 C   0  0  0  0  0  0  0  0  0  0  0  0
    0.8660    0.5000    0.0000 C   0  0  0  0  0  0  0  0  0  0  0  0
    0.0000   -0.0000    0.0000 C   0  0  0  0  0  0  0  0  0  0  0  0
   -0.8660    0.5000    0.0000 C   0  0  0  0  0  0  0  0  0  0  0  0
   -1.7321    0.0000    0.0000 C   0  0  0  0  0  0  0  0  0  0  0  0
   -2.5981    0.5000    0.0000 O   0  0  0  0  0  0  0  0  0  0  0  0
   -1.7321   -1.0000    0.0000 C   0  0  0  0  0  0  0  0  0  0  0  0
   -0.8660   -1.5000    0.0000 C   0  0  0  0  0  0  0  0  0  0  0  0
   -0.0000   -1.0000    0.0000 C   0  0  0  0  0  0  0  0  0  0  0  0
   -0.0000   -2.0000    0.0000 C   0  0  0  0  0  0  0  0  0  0  0  0
    2.5981   -1.5000    0.0000 C   0  0  0  0  0  0  0  0  0  0  0  0
    3.5491   -1.1910    0.0000 C   0  0  0  0  0  0  0  0  0  0  0  0
    4.1369   -2.0000    0.0000 C   0  0  0  0  0  0  0  0  0  0  0  0
    3.5491   -2.8090    0.0000 C   0  0  0  0  0  0  0  0  0  0  0  0
    3.8581   -3.7601    0.0000 O   0  0  0  0  0  0  0  0  0  0  0  0
  1  2  1  0
  2  3  1  0
  3  4  1  0
  4  5  1  0
  5  6  1  0
  6  7  1  0
  6 17  1  0
  7  8  1  0
  8  9  2  0
  9 10  1  0
 10 11  1  0
 11 12  1  0
 11 13  1  0
 13 14  1  0
 14 15  1  0
 15 16  1  0
 15  5  1  0
 15  9  1  0
 17 18  1  0
 17  2  1  0
 18 19  1  0
 19 20  1  0
 20 21  2  0
 20  2  1  0
M  END
>  <group_A>  (76) 
1

>  <group_B>  (76) 
0

>  <group_C>  (76) 
0

>  <group_D>  (76) 
0

>  <group_G>  (76) 
1

>  <group_H>  (76) 
0

>  <group_J>  (76) 
0

>  <group_L>  (76) 
0

>  <group_M>  (76) 
0

>  <group_N>  (76) 
0

>  <group_P>  (76) 
0

>  <group_R>  (76) 
0

>  <group_S>  (76) 
0

>  <group_V>  (76) 
0

$$$$

     RDKit          2D

  9  8  0  0  0  0  0  0  0  0999 V2000
    3.4641   -0.0000    0.0000 C   0  0  0  0  0  0  0  0  0  0  0  0
    3.4641    1.0000    0.0000 Se  0  0  0  0  0  2  0  0  0  0  0  0
    2.5981    1.5000    0.0000 C   0  0  0  0  0  0  0  0  0  0  0  0
    1.7321    1.0000    0.0000 C   0  0  0  0  0  0  0  0  0  0  0  0
    0.8660    1.5000    0.0000 C   0  0  0  0  0  0  0  0  0  0  0  0
    0.8660    2.5000    0.0000 N   0  0  0  0  0  0  0  0  0  0  0  0
   -0.0000    1.0000    0.0000 C   0  0  0  0  0  0  0  0  0  0  0  0
   -0.8660    1.5000    0.0000 O   0  0  0  0  0  0  0  0  0  0  0  0
   -0.0000   -0.0000    0.0000 O   0  0  0  0  0  0  0  0  0  0  0  0
  1  2  1  0
  2  3  1  0
  3  4  1  0
  4  5  1  0
  5  6  1  0
  5  7  1  0
  7  8  2  0
  7  9  1  0
M  END
>  <group_A>  (77) 
1

>  <group_B>  (77) 
1

>  <group_C>  (77) 
1

>  <group_D>  (77) 
1

>  <group_G>  (77) 
1

>  <group_H>  (77) 
0

>  <group_J>  (77) 
1

>  <group_L>  (77) 
1

>  <group_M>  (77) 
1

>  <group_N>  (77) 
1

>  <group_P>  (77) 
0

>  <group_R>  (77) 
1

>  <group_S>  (77) 
1

>  <group_V>  (77) 
1

$$$$

     RDKit          2D

 23 25  0  0  0  0  0  0  0  0999 V2000
   -7.9690    2.1583    0.0000 N   0  0  0  0  0  0  0  0  0  0  0  0
   -7.3812    1.3493    0.0000 C   0  0  0  0  0  0  0  0  0  0  0  0
   -7.7880    0.4357    0.0000 N   0  0  0  0  0  0  0  0  0  0  0  0
   -7.2002   -0.3733    0.0000 C   0  0  0  0  0  0  0  0  0  0  0  0
   -6.2057   -0.2688    0.0000 N   0  0  0  0  0  0  0  0  0  0  0  0
   -5.7989    0.6448    0.0000 C   0  0  0  0  0  0  0  0  0  0  0  0
   -6.3867    1.4538    0.0000 C   0  0  0  0  0  0  0  0  0  0  0  0
   -5.7989    2.2628    0.0000 N   0  0  0  0  0  0  0  0  0  0  0  0
   -4.8479    1.9538    0.0000 C   0  0  0  0  0  0  0  0  0  0  0  0
   -4.8479    0.9538    0.0000 N   0  0  0  0  0  0  0  0  0  0  0  0
   -4.0388    0.3660    0.0000 C   0  0  0  0  0  0  0  0  0  0  0  0
   -3.0878    0.6750    0.0000 O   0  0  0  0  0  0  0  0  0  0  0  0
   -2.5000   -0.1340    0.0000 C   0  0  0  0  0  0  0  0  0  0  0  0
   -1.5000   -0.1340    0.0000 C   0  0  0  0  0  0  0  0  0  0  0  0
   -1.0000   -1.0000    0.0000 O   0  0  0  0  0  0  0  0  0  0  0  0
    0.0000   -1.0000    0.0000 P   0  0  0  0  0  0  0  0  0  0  0  0
    0.0000   -2.0000    0.0000 O   0  0  0  0  0  0  0  0  0  0  0  0
    1.0000   -1.0000    0.0000 O   0  0  0  0  0  0  0  0  0  0  0  0
    0.0000    0.0000    0.0000 O   0  0  0  0  0  0  0  0  0  0  0  0
   -3.0878   -0.9430    0.0000 C   0  0  0  0  0  0  0  0  0  0  0  0
   -2.7788   -1.8940    0.0000 O   0  0  0  0  0  0  0  0  0  0  0  0
   -4.0388   -0.6340    0.0000 C   0  0  0  0  0  0  0  0  0  0  0  0
   -4.8479   -1.2218    0.0000 O   0  0  0  0  0  0  0  0  0  0  0  0
  1  2  1  0
  2  3  2  0
  3  4  1  0
  4  5  2  0
  5  6  1  0
  6  7  2  0
  7  8  1  0
  7  2  1  0
  8  9  2  0
  9 10  1  0
 10 11  1  0
 10  6  1  0
 11 12  1  0
 12 13  1  0
 13 14  1  0
 13 20  1  0
 14 15  1  0
 15 16  1  0
 16 17  2  0
 16 18  1  0
 16 19  1  0
 20 21  1  0
 20 22  1  0
 22 23  1  0
 22 11  1  0
M  END
>  <group_A>  (78) 
1

>  <group_B>  (78) 
1

>  <group_C>  (78) 
1

>  <group_D>  (78) 
1

>  <group_G>  (78) 
1

>  <group_H>  (78) 
0

>  <group_J>  (78) 
0

>  <group_L>  (78) 
0

>  <group_M>  (78) 
0

>  <group_N>  (78) 
1

>  <group_P>  (78) 
0

>  <group_R>  (78) 
0

>  <group_S>  (78) 
1

>  <group_V>  (78) 
1

$$$$

     RDKit          2D

  3  2  0  0  0  0  0  0  0  0999 V2000
    1.7321   -0.0000    0.0000 O   0  0  0  0  0  0  0  0  0  0  0  0
    0.8660    0.5000    0.0000 U   0  0  0  0  0  2  0  0  0  0  0  0
   -0.0000   -0.0000    0.0000 O   0  0  0  0  0  0  0  0  0  0  0  0
  1  2  1  0
  2  3  1  0
M  CHG  3   1  -1   2   4   3  -1
M  RAD  1   2   3
M  END
>  <group_A>  (79) 
0

>  <group_B>  (79) 
0

>  <group_C>  (79) 
0

>  <group_D>  (79) 
0

>  <group_G>  (79) 
1

>  <group_H>  (79) 
0

>  <group_J>  (79) 
0

>  <group_L>  (79) 
0

>  <group_M>  (79) 
0

>  <group_N>  (79) 
0

>  <group_P>  (79) 
0

>  <group_R>  (79) 
0

>  <group_S>  (79) 
1

>  <group_V>  (79) 
0

$$$$

     RDKit          2D

  9  8  0  0  0  0  0  0  0  0999 V2000
    3.4641   -0.0000    0.0000 O   0  0  0  0  0  0  0  0  0  0  0  0
    3.4641    1.0000    0.0000 C   0  0  0  0  0  0  0  0  0  0  0  0
    4.3301    1.5000    0.0000 O   0  0  0  0  0  0  0  0  0  0  0  0
    2.5981    1.5000    0.0000 C   0  0  0  0  0  0  0  0  0  0  0  0
    1.7321    1.0000    0.0000 C   0  0  0  0  0  0  0  0  0  0  0  0
    0.8660    1.5000    0.0000 C   0  0  0  0  0  0  0  0  0  0  0  0
    0.0000    1.0000    0.0000 C   0  0  0  0  0  0  0  0  0  0  0  0
   -0.8660    1.5000    0.0000 O   0  0  0  0  0  0  0  0  0  0  0  0
    0.0000    0.0000    0.0000 O   0  0  0  0  0  0  0  0  0  0  0  0
  1  2  2  0
  2  3  1  0
  2  4  1  0
  4  5  1  0
  5  6  1  0
  6  7  1  0
  7  8  2  0
  7  9  1  0
M  END
>  <group_A>  (80) 
1

>  <group_B>  (80) 
0

>  <group_C>  (80) 
0

>  <group_D>  (80) 
0

>  <group_G>  (80) 
0

>  <group_H>  (80) 
0

>  <group_J>  (80) 
0

>  <group_L>  (80) 
0

>  <group_M>  (80) 
0

>  <group_N>  (80) 
0

>  <group_P>  (80) 
0

>  <group_R>  (80) 
0

>  <group_S>  (80) 
0

>  <group_V>  (80) 
0

$$$$

     RDKit          2D

  8  7  0  0  0  0  0  0  0  0999 V2000
    3.4641   -1.0000    0.0000 O   0  0  0  0  0  0  0  0  0  0  0  0
    3.4641    0.0000    0.0000 C   0  0  0  0  0  0  0  0  0  0  0  0
    4.3301    0.5000    0.0000 O   0  0  0  0  0  0  0  0  0  0  0  0
    2.5981    0.5000    0.0000 C   0  0  0  0  0  0  0  0  0  0  0  0
    1.7321    0.0000    0.0000 C   0  0  0  0  0  0  0  0  0  0  0  0
    0.8660    0.5000    0.0000 C   0  0  0  0  0  0  0  0  0  0  0  0
    0.8660    1.5000    0.0000 O   0  0  0  0  0  0  0  0  0  0  0  0
   -0.0000   -0.0000    0.0000 O   0  0  0  0  0  0  0  0  0  0  0  0
  1  2  2  0
  2  3  1  0
  2  4  1  0
  4  5  1  0
  5  6  1  0
  6  7  2  0
  6  8  1  0
M  END
>  <group_A>  (81) 
1

>  <group_B>  (81) 
1

>  <group_C>  (81) 
0

>  <group_D>  (81) 
1

>  <group_G>  (81) 
1

>  <group_H>  (81) 
0

>  <group_J>  (81) 
0

>  <group_L>  (81) 
0

>  <group_M>  (81) 
1

>  <group_N>  (81) 
0

>  <group_P>  (81) 
0

>  <group_R>  (81) 
0

>  <group_S>  (81) 
1

>  <group_V>  (81) 
1

$$$$

     RDKit          2D

 31 33  0  0  0  0  0  0  0  0999 V2000
   -6.0000   -6.1962    0.0000 C   0  0  0  0  0  0  0  0  0  0  0  0
   -5.5000   -5.3301    0.0000 C   0  0  0  0  0  0  0  0  0  0  0  0
   -6.0000   -4.4641    0.0000 C   0  0  0  0  0  0  0  0  0  0  0  0
   -5.5000   -3.5981    0.0000 C   0  0  0  0  0  0  0  0  0  0  0  0
   -6.0000   -2.7321    0.0000 N   0  0  0  0  0  0  0  0  0  0  0  0
   -5.5000   -1.8660    0.0000 C   0  0  0  0  0  0  0  0  0  0  0  0
   -6.0000   -1.0000    0.0000 C   0  0  0  0  0  0  0  0  0  0  0  0
   -7.0000   -1.0000    0.0000 O   0  0  0  0  0  0  0  0  0  0  0  0
   -5.5000   -0.1340    0.0000 N   0  0  0  0  0  0  0  0  0  0  0  0
   -4.5000   -0.1340    0.0000 C   0  0  0  0  0  0  0  0  0  0  0  0
   -4.0000    0.7321    0.0000 O   0  0  0  0  0  0  0  0  0  0  0  0
   -4.0000   -1.0000    0.0000 N   0  0  0  0  0  0  0  0  0  0  0  0
   -4.5000   -1.8660    0.0000 C   0  0  0  0  0  0  0  0  0  0  0  0
   -4.0000   -2.7321    0.0000 N   0  0  0  0  0  0  0  0  0  0  0  0
   -3.0000   -2.7321    0.0000 C   0  0  0  0  0  0  0  0  0  0  0  0
   -2.5000   -3.5981    0.0000 C   0  0  0  0  0  0  0  0  0  0  0  0
   -3.0000   -4.4641    0.0000 O   0  0  0  0  0  0  0  0  0  0  0  0
   -1.5000   -3.5981    0.0000 C   0  0  0  0  0  0  0  0  0  0  0  0
   -1.0000   -4.4641    0.0000 O   0  0  0  0  0  0  0  0  0  0  0  0
   -1.0000   -2.7321    0.0000 C   0  0  0  0  0  0  0  0  0  0  0  0
   -0.0000   -2.7321    0.0000 O   0  0  0  0  0  0  0  0  0  0  0  0
   -1.5000   -1.8660    0.0000 C   0  0  0  0  0  0  0  0  0  0  0  0
   -1.0000   -1.0000    0.0000 O   0  0  0  0  0  0  0  0  0  0  0  0
   -0.0000   -1.0000    0.0000 P   0  0  0  0  0  0  0  0  0  0  0  0
    0.0000   -2.0000    0.0000 O   0  0  0  0  0  0  0  0  0  0  0  0
    1.0000   -1.0000    0.0000 O   0  0  0  0  0  0  0  0  0  0  0  0
    0.0000    0.0000    0.0000 O   0  0  0  0  0  0  0  0  0  0  0  0
   -4.5000   -3.5981    0.0000 C   0  0  0  0  0  0  0  0  0  0  0  0
   -4.0000   -4.4641    0.0000 C   0  0  0  0  0  0  0  0  0  0  0  0
   -4.5000   -5.3301    0.0000 C   0  0  0  0  0  0  0  0  0  0  0  0
   -4.0000   -6.1962    0.0000 C   0  0  0  0  0  0  0  0  0  0  0  0
  1  2  1  0
  2  3  2  0
  3  4  1  0
  4  5  1  0
  5  6  2  0
  6  7  1  0
  7  8  2  0
  7  9  1  0
  9 10  1  0
 10 11  2  0
 10 12  1  0
 12 13  2  0
 13 14  1  0
 13  6  1  0
 14 15  1  0
 14 28  1  0
 15 16  1  0
 16 17  1  0
 16 18  1  0
 18 19  1  0
 18 20  1  0
 20 21  1  0
 20 22  1  0
 22 23  1  0
 23 24  1  0
 24 25  2  0
 24 26  1  0
 24 27  1  0
 28 29  1  0
 28  4  2  0
 29 30  2  0
 30 31  1  0
 30  2  1  0
M  END
>  <group_A>  (82) 
1

>  <group_B>  (82) 
1

>  <group_C>  (82) 
1

>  <group_D>  (82) 
1

>  <group_G>  (82) 
1

>  <group_H>  (82) 
0

>  <group_J>  (82) 
0

>  <group_L>  (82) 
0

>  <group_M>  (82) 
1

>  <group_N>  (82) 
0

>  <group_P>  (82) 
0

>  <group_R>  (82) 
0

>  <group_S>  (82) 
1

>  <group_V>  (82) 
1

$$$$

     RDKit          2D

  5  4  0  0  0  0  0  0  0  0999 V2000
    1.0000   -1.0000    0.0000 C   0  0  0  0  0  0  0  0  0  0  0  0
    1.0000    0.0000    0.0000 As  0  0  0  0  0  5  0  0  0  0  0  0
    2.0000    0.0000    0.0000 C   0  0  0  0  0  0  0  0  0  0  0  0
    1.0000    1.0000    0.0000 O   0  0  0  0  0  0  0  0  0  0  0  0
    0.0000    0.0000    0.0000 O   0  0  0  0  0  0  0  0  0  0  0  0
  1  2  1  0
  2  3  1  0
  2  4  2  0
  2  5  1  0
M  END
>  <group_A>  (83) 
1

>  <group_B>  (83) 
0

>  <group_C>  (83) 
0

>  <group_D>  (83) 
0

>  <group_G>  (83) 
1

>  <group_H>  (83) 
0

>  <group_J>  (83) 
0

>  <group_L>  (83) 
0

>  <group_M>  (83) 
0

>  <group_N>  (83) 
0

>  <group_P>  (83) 
0

>  <group_R>  (83) 
0

>  <group_S>  (83) 
1

>  <group_V>  (83) 
0

$$$$

     RDKit          2D

 13 14  0  0  0  0  0  0  0  0999 V2000
   -1.7321   -3.0000    0.0000 O   0  0  0  0  0  0  0  0  0  0  0  0
   -0.8660   -2.5000    0.0000 N   0  0  0  0  0  0  0  0  0  0  0  0
    0.0000   -3.0000    0.0000 O   0  0  0  0  0  0  0  0  0  0  0  0
   -0.8660   -1.5000    0.0000 C   0  0  0  0  0  0  0  0  0  0  0  0
   -1.7321   -1.0000    0.0000 C   0  0  0  0  0  0  0  0  0  0  0  0
   -1.7321    0.0000    0.0000 C   0  0  0  0  0  0  0  0  0  0  0  0
   -0.8660    0.5000    0.0000 C   0  0  0  0  0  0  0  0  0  0  0  0
    0.0000   -0.0000    0.0000 C   0  0  0  0  0  0  0  0  0  0  0  0
    0.9511    0.3090    0.0000 C   0  0  0  0  0  0  0  0  0  0  0  0
    1.2601    1.2601    0.0000 Br  0  0  0  0  0  0  0  0  0  0  0  0
    1.5388   -0.5000    0.0000 N   0  0  0  0  0  0  0  0  0  0  0  0
    0.9511   -1.3090    0.0000 N   0  0  0  0  0  0  0  0  0  0  0  0
   -0.0000   -1.0000    0.0000 C   0  0  0  0  0  0  0  0  0  0  0  0
  1  2  2  0
  2  3  1  0
  2  4  1  0
  4  5  2  0
  5  6  1  0
  6  7  2  0
  7  8  1  0
  8  9  1  0
  9 10  1  0
  9 11  2  0
 11 12  1  0
 12 13  1  0
 13  4  1  0
 13  8  2  0
M  CHG  2   2   1   3  -1
M  END
>  <group_A>  (84) 
1

>  <group_B>  (84) 
0

>  <group_C>  (84) 
0

>  <group_D>  (84) 
0

>  <group_G>  (84) 
1

>  <group_H>  (84) 
0

>  <group_J>  (84) 
0

>  <group_L>  (84) 
0

>  <group_M>  (84) 
0

>  <group_N>  (84) 
0

>  <group_P>  (84) 
0

>  <group_R>  (84) 
0

>  <group_S>  (84) 
1

>  <group_V>  (84) 
0

$$$$

     RDKit          2D

  6  5  0  0  0  0  0  0  0  0999 V2000
    1.7321    1.0000    0.0000 C   0  0  0  0  0  0  0  0  0  0  0  0
    0.8660    1.5000    0.0000 C   0  0  0  0  0  0  0  0  0  0  0  0
    0.8660    2.5000    0.0000 N   0  0  0  0  0  0  0  0  0  0  0  0
    0.0000    1.0000    0.0000 C   0  0  0  0  0  0  0  0  0  0  0  0
   -0.8660    1.5000    0.0000 O   0  0  0  0  0  0  0  0  0  0  0  0
   -0.0000   -0.0000    0.0000 O   0  0  0  0  0  0  0  0  0  0  0  0
  1  2  1  0
  2  3  1  0
  2  4  1  0
  4  5  2  0
  4  6  1  0
M  END
>  <group_A>  (85) 
1

>  <group_B>  (85) 
1

>  <group_C>  (85) 
0

>  <group_D>  (85) 
0

>  <group_G>  (85) 
1

>  <group_H>  (85) 
0

>  <group_J>  (85) 
0

>  <group_L>  (85) 
0

>  <group_M>  (85) 
0

>  <group_N>  (85) 
0

>  <group_P>  (85) 
0

>  <group_R>  (85) 
0

>  <group_S>  (85) 
1

>  <group_V>  (85) 
1

$$$$

     RDKit          2D

 20 20  0  0  0  0  0  0  0  0999 V2000
   -1.7321   -1.0000    0.0000 C   0  0  0  0  0  0  0  0  0  0  0  0
   -0.8660   -1.5000    0.0000 C   0  0  0  0  0  0  0  0  0  0  0  0
   -0.8660   -2.5000    0.0000 O   0  0  0  0  0  0  0  0  0  0  0  0
   -0.0000   -1.0000    0.0000 N   0  0  0  0  0  0  0  0  0  0  0  0
    0.0000   -0.0000    0.0000 C   0  0  0  0  0  0  0  0  0  0  0  0
   -0.8660    0.5000    0.0000 C   0  0  0  0  0  0  0  0  0  0  0  0
   -1.7321   -0.0000    0.0000 O   0  0  0  0  0  0  0  0  0  0  0  0
   -0.8660    1.5000    0.0000 O   0  0  0  0  0  0  0  0  0  0  0  0
   -0.0000    2.0000    0.0000 C   0  0  0  0  0  0  0  0  0  0  0  0
   -0.0000    3.0000    0.0000 C   0  0  0  0  0  0  0  0  0  0  0  0
    0.8660    3.5000    0.0000 O   0  0  0  0  0  0  0  0  0  0  0  0
    0.8660    1.5000    0.0000 C   0  0  0  0  0  0  0  0  0  0  0  0
    1.7321    2.0000    0.0000 O   0  0  0  0  0  0  0  0  0  0  0  0
    0.8660    0.5000    0.0000 C   0  0  0  0  0  0  0  0  0  0  0  0
    1.7321    0.0000    0.0000 O   0  0  0  0  0  0  0  0  0  0  0  0
    2.5981    0.5000    0.0000 C   0  0  0  0  0  0  0  0  0  0  0  0
    2.5981    1.5000    0.0000 C   0  0  0  0  0  0  0  0  0  0  0  0
    3.4641    0.0000    0.0000 C   0  0  0  0  0  0  0  0  0  0  0  0
    4.3301    0.5000    0.0000 O   0  0  0  0  0  0  0  0  0  0  0  0
    3.4641   -1.0000    0.0000 O   0  0  0  0  0  0  0  0  0  0  0  0
  1  2  1  0
  2  3  2  0
  2  4  1  0
  4  5  1  0
  5  6  1  0
  6  7  1  0
  6  8  1  0
  8  9  1  0
  9 10  1  0
  9 12  1  0
 10 11  1  0
 12 13  1  0
 12 14  1  0
 14 15  1  0
 14  5  1  0
 15 16  1  0
 16 17  1  0
 16 18  1  0
 18 19  2  0
 18 20  1  0
M  END
>  <group_A>  (86) 
1

>  <group_B>  (86) 
0

>  <group_C>  (86) 
0

>  <group_D>  (86) 
0

>  <group_G>  (86) 
1

>  <group_H>  (86) 
0

>  <group_J>  (86) 
0

>  <group_L>  (86) 
0

>  <group_M>  (86) 
0

>  <group_N>  (86) 
0

>  <group_P>  (86) 
0

>  <group_R>  (86) 
0

>  <group_S>  (86) 
1

>  <group_V>  (86) 
0

$$$$

     RDKit          2D

 10  9  0  0  0  0  0  0  0  0999 V2000
   -1.7321    1.0000    0.0000 N   0  0  0  0  0  0  0  0  0  0  0  0
   -1.7321    0.0000    0.0000 C   0  0  0  0  0  0  0  0  0  0  0  0
   -2.5981   -0.5000    0.0000 C   0  0  0  0  0  0  0  0  0  0  0  0
   -2.5981   -1.5000    0.0000 C   0  0  0  0  0  0  0  0  0  0  0  0
   -3.4641   -2.0000    0.0000 C   0  0  0  0  0  0  0  0  0  0  0  0
   -4.3301   -1.5000    0.0000 O   0  0  0  0  0  0  0  0  0  0  0  0
   -3.4641   -3.0000    0.0000 O   0  0  0  0  0  0  0  0  0  0  0  0
   -0.8660   -0.5000    0.0000 C   0  0  0  0  0  0  0  0  0  0  0  0
   -0.8660   -1.5000    0.0000 O   0  0  0  0  0  0  0  0  0  0  0  0
    0.0000   -0.0000    0.0000 O   0  0  0  0  0  0  0  0  0  0  0  0
  1  2  1  0
  2  3  1  0
  2  8  1  0
  3  4  1  0
  4  5  1  0
  5  6  2  0
  5  7  1  0
  8  9  2  0
  8 10  1  0
M  END
>  <group_A>  (87) 
1

>  <group_B>  (87) 
1

>  <group_C>  (87) 
0

>  <group_D>  (87) 
0

>  <group_G>  (87) 
1

>  <group_H>  (87) 
0

>  <group_J>  (87) 
0

>  <group_L>  (87) 
0

>  <group_M>  (87) 
0

>  <group_N>  (87) 
0

>  <group_P>  (87) 
0

>  <group_R>  (87) 
0

>  <group_S>  (87) 
1

>  <group_V>  (87) 
0

$$$$

     RDKit          2D

 14 14  0  0  0  0  0  0  0  0999 V2000
   -3.3301   -2.5000    0.0000 O   0  0  0  0  0  0  0  0  0  0  0  0
   -2.4641   -3.0000    0.0000 N   0  0  0  0  0  0  0  0  0  0  0  0
   -2.4641   -4.0000    0.0000 O   0  0  0  0  0  0  0  0  0  0  0  0
   -1.5981   -2.5000    0.0000 C   0  0  0  0  0  0  0  0  0  0  0  0
   -1.5981   -1.5000    0.0000 C   0  0  0  0  0  0  0  0  0  0  0  0
   -0.7321   -1.0000    0.0000 C   0  0  0  0  0  0  0  0  0  0  0  0
    0.1340   -1.5000    0.0000 C   0  0  0  0  0  0  0  0  0  0  0  0
    1.0000   -1.0000    0.0000 O   0  0  0  0  0  0  0  0  0  0  0  0
    1.0000   -0.0000    0.0000 P   0  0  0  0  0  0  0  0  0  0  0  0
    2.0000   -0.0000    0.0000 O   0  0  0  0  0  0  0  0  0  0  0  0
    1.0000    1.0000    0.0000 O   0  0  0  0  0  0  0  0  0  0  0  0
    0.0000   -0.0000    0.0000 O   0  0  0  0  0  0  0  0  0  0  0  0
    0.1340   -2.5000    0.0000 C   0  0  0  0  0  0  0  0  0  0  0  0
   -0.7321   -3.0000    0.0000 C   0  0  0  0  0  0  0  0  0  0  0  0
  1  2  2  0
  2  3  1  0
  2  4  1  0
  4  5  2  0
  5  6  1  0
  6  7  2  0
  7  8  1  0
  7 13  1  0
  8  9  1  0
  9 10  2  0
  9 11  1  0
  9 12  1  0
 13 14  2  0
 14  4  1  0
M  CHG  2   2   1   3  -1
M  END
>  <group_A>  (88) 
1

>  <group_B>  (88) 
0

>  <group_C>  (88) 
0

>  <group_D>  (88) 
0

>  <group_G>  (88) 
0

>  <group_H>  (88) 
0

>  <group_J>  (88) 
0

>  <group_L>  (88) 
0

>  <group_M>  (88) 
0

>  <group_N>  (88) 
0

>  <group_P>  (88) 
0

>  <group_R>  (88) 
0

>  <group_S>  (88) 
0

>  <group_V>  (88) 
0

$$$$

     RDKit          2D

 17 18  0  0  0  0  0  0  0  0999 V2000
    3.4641   -0.0000    0.0000 C   0  0  0  0  0  0  0  0  0  0  0  0
    3.4641    1.0000    0.0000 C   0  0  0  0  0  0  0  0  0  0  0  0
    4.3301    1.5000    0.0000 O   0  0  0  0  0  0  0  0  0  0  0  0
    2.5981    1.5000    0.0000 C   0  0  0  0  0  0  0  0  0  0  0  0
    2.5981    2.5000    0.0000 O   0  0  0  0  0  0  0  0  0  0  0  0
    1.7321    1.0000    0.0000 C   0  0  0  0  0  0  0  0  0  0  0  0
    1.7321   -0.0000    0.0000 C   0  0  0  0  0  0  0  0  0  0  0  0
    0.8660   -0.5000    0.0000 N   0  0  0  0  0  0  0  0  0  0  0  0
    0.0000    0.0000    0.0000 C   0  0  0  0  0  0  0  0  0  0  0  0
   -0.8660   -0.5000    0.0000 N   0  0  0  0  0  0  0  0  0  0  0  0
   -1.7321   -0.0000    0.0000 C   0  0  0  0  0  0  0  0  0  0  0  0
   -2.5981   -0.5000    0.0000 N   0  0  0  0  0  0  0  0  0  0  0  0
   -1.7321    1.0000    0.0000 N   0  0  0  0  0  0  0  0  0  0  0  0
   -0.8660    1.5000    0.0000 C   0  0  0  0  0  0  0  0  0  0  0  0
   -0.8660    2.5000    0.0000 O   0  0  0  0  0  0  0  0  0  0  0  0
    0.0000    1.0000    0.0000 C   0  0  0  0  0  0  0  0  0  0  0  0
    0.8660    1.5000    0.0000 N   0  0  0  0  0  0  0  0  0  0  0  0
  1  2  1  0
  2  3  1  0
  2  4  1  0
  4  5  1  0
  4  6  1  0
  6  7  1  0
  7  8  1  0
  8  9  1  0
  9 10  1  0
 10 11  2  0
 11 12  1  0
 11 13  1  0
 13 14  1  0
 14 15  2  0
 14 16  1  0
 16 17  1  0
 16  9  2  0
 17  6  1  0
M  END
>  <group_A>  (89) 
1

>  <group_B>  (89) 
1

>  <group_C>  (89) 
0

>  <group_D>  (89) 
0

>  <group_G>  (89) 
1

>  <group_H>  (89) 
0

>  <group_J>  (89) 
0

>  <group_L>  (89) 
0

>  <group_M>  (89) 
0

>  <group_N>  (89) 
0

>  <group_P>  (89) 
0

>  <group_R>  (89) 
1

>  <group_S>  (89) 
1

>  <group_V>  (89) 
0

$$$$

     RDKit          2D

  4  3  0  0  0  0  0  0  0  0999 V2000
    2.0000    0.0000    0.0000 O   0  0  0  0  0  0  0  0  0  0  0  0
    1.5000    0.8660    0.0000 C   0  0  0  0  0  0  0  0  0  0  0  0
    0.5000    0.8660    0.0000 C   0  0  0  0  0  0  0  0  0  0  0  0
   -0.0000   -0.0000    0.0000 O   0  0  0  0  0  0  0  0  0  0  0  0
  1  2  1  0
  2  3  1  0
  3  4  1  0
M  END
>  <group_A>  (90) 
1

>  <group_B>  (90) 
1

>  <group_C>  (90) 
1

>  <group_D>  (90) 
1

>  <group_G>  (90) 
1

>  <group_H>  (90) 
1

>  <group_J>  (90) 
1

>  <group_L>  (90) 
1

>  <group_M>  (90) 
1

>  <group_N>  (90) 
1

>  <group_P>  (90) 
1

>  <group_R>  (90) 
1

>  <group_S>  (90) 
1

>  <group_V>  (90) 
1

$$$$

     RDKit          2D

 31 33  0  0  0  0  0  0  0  0999 V2000
    7.9690   -4.1583    0.0000 N   0  0  0  0  0  0  0  0  0  0  0  0
    7.3812   -3.3493    0.0000 C   0  0  0  0  0  0  0  0  0  0  0  0
    7.7880   -2.4357    0.0000 N   0  0  0  0  0  0  0  0  0  0  0  0
    7.2002   -1.6267    0.0000 C   0  0  0  0  0  0  0  0  0  0  0  0
    6.2057   -1.7312    0.0000 N   0  0  0  0  0  0  0  0  0  0  0  0
    5.7989   -2.6448    0.0000 C   0  0  0  0  0  0  0  0  0  0  0  0
    6.3867   -3.4538    0.0000 C   0  0  0  0  0  0  0  0  0  0  0  0
    5.7989   -4.2628    0.0000 N   0  0  0  0  0  0  0  0  0  0  0  0
    4.8479   -3.9538    0.0000 C   0  0  0  0  0  0  0  0  0  0  0  0
    4.8479   -2.9538    0.0000 N   0  0  0  0  0  0  0  0  0  0  0  0
    4.0388   -2.3660    0.0000 C   0  0  0  0  0  0  0  0  0  0  0  0
    3.0878   -2.6750    0.0000 O   0  0  0  0  0  0  0  0  0  0  0  0
    2.5000   -1.8660    0.0000 C   0  0  0  0  0  0  0  0  0  0  0  0
    1.5000   -1.8660    0.0000 C   0  0  0  0  0  0  0  0  0  0  0  0
    1.0000   -1.0000    0.0000 O   0  0  0  0  0  0  0  0  0  0  0  0
    0.0000   -1.0000    0.0000 P   0  0  0  0  0  0  0  0  0  0  0  0
   -0.0000   -2.0000    0.0000 O   0  0  0  0  0  0  0  0  0  0  0  0
   -1.0000   -1.0000    0.0000 O   0  0  0  0  0  0  0  0  0  0  0  0
    0.0000   -0.0000    0.0000 O   0  0  0  0  0  0  0  0  0  0  0  0
    0.0000    1.0000    0.0000 P   0  0  0  0  0  0  0  0  0  0  0  0
   -1.0000    1.0000    0.0000 O   0  0  0  0  0  0  0  0  0  0  0  0
    0.0000    2.0000    0.0000 O   0  0  0  0  0  0  0  0  0  0  0  0
    1.0000    1.0000    0.0000 N   0  0  0  0  0  0  0  0  0  0  0  0
    2.0000    1.0000    0.0000 P   0  0  0  0  0  0  0  0  0  0  0  0
    2.0000    2.0000    0.0000 O   0  0  0  0  0  0  0  0  0  0  0  0
    3.0000    1.0000    0.0000 O   0  0  0  0  0  0  0  0  0  0  0  0
    2.0000    0.0000    0.0000 O   0  0  0  0  0  0  0  0  0  0  0  0
    3.0878   -1.0570    0.0000 C   0  0  0  0  0  0  0  0  0  0  0  0
    2.7788   -0.1060    0.0000 O   0  0  0  0  0  0  0  0  0  0  0  0
    4.0388   -1.3660    0.0000 C   0  0  0  0  0  0  0  0  0  0  0  0
    4.8479   -0.7782    0.0000 O   0  0  0  0  0  0  0  0  0  0  0  0
  1  2  1  0
  2  3  2  0
  3  4  1  0
  4  5  2  0
  5  6  1  0
  6  7  2  0
  7  8  1  0
  7  2  1  0
  8  9  2  0
  9 10  1  0
 10 11  1  0
 10  6  1  0
 11 12  1  0
 12 13  1  0
 13 14  1  0
 13 28  1  0
 14 15  1  0
 15 16  1  0
 16 17  2  0
 16 18  1  0
 16 19  1  0
 19 20  1  0
 20 21  2  0
 20 22  1  0
 20 23  1  0
 23 24  1  0
 24 25  2  0
 24 26  1  0
 24 27  1  0
 28 29  1  0
 28 30  1  0
 30 31  1  0
 30 11  1  0
M  END
>  <group_A>  (91) 
1

>  <group_B>  (91) 
1

>  <group_C>  (91) 
1

>  <group_D>  (91) 
0

>  <group_G>  (91) 
1

>  <group_H>  (91) 
0

>  <group_J>  (91) 
0

>  <group_L>  (91) 
1

>  <group_M>  (91) 
0

>  <group_N>  (91) 
0

>  <group_P>  (91) 
0

>  <group_R>  (91) 
0

>  <group_S>  (91) 
1

>  <group_V>  (91) 
1

$$$$

     RDKit          2D

 21 24  0  0  0  0  0  0  0  0999 V2000
    2.1913   -3.4135    0.0000 C   0  0  0  0  0  0  0  0  0  0  0  0
    2.5981   -2.5000    0.0000 C   0  0  0  0  0  0  0  0  0  0  0  0
    1.7321   -3.0000    0.0000 C   0  0  0  0  0  0  0  0  0  0  0  0
    0.8660   -2.5000    0.0000 C   0  0  0  0  0  0  0  0  0  0  0  0
    0.8660   -1.5000    0.0000 C   0  0  0  0  0  0  0  0  0  0  0  0
    1.7321   -1.0000    0.0000 C   0  0  0  0  0  0  0  0  0  0  0  0
    1.7321    0.0000    0.0000 C   0  0  0  0  0  0  0  0  0  0  0  0
    0.8660    0.5000    0.0000 C   0  0  0  0  0  0  0  0  0  0  0  0
    0.0000   -0.0000    0.0000 C   0  0  0  0  0  0  0  0  0  0  0  0
   -0.8660    0.5000    0.0000 C   0  0  0  0  0  0  0  0  0  0  0  0
   -1.7321    0.0000    0.0000 C   0  0  0  0  0  0  0  0  0  0  0  0
   -2.5981    0.5000    0.0000 O   0  0  0  0  0  0  0  0  0  0  0  0
   -1.7321   -1.0000    0.0000 C   0  0  0  0  0  0  0  0  0  0  0  0
   -0.8660   -1.5000    0.0000 C   0  0  0  0  0  0  0  0  0  0  0  0
   -0.0000   -1.0000    0.0000 C   0  0  0  0  0  0  0  0  0  0  0  0
   -0.0000   -2.0000    0.0000 C   0  0  0  0  0  0  0  0  0  0  0  0
    2.5981   -1.5000    0.0000 C   0  0  0  0  0  0  0  0  0  0  0  0
    3.5491   -1.1910    0.0000 C   0  0  0  0  0  0  0  0  0  0  0  0
    4.1369   -2.0000    0.0000 C   0  0  0  0  0  0  0  0  0  0  0  0
    3.5491   -2.8090    0.0000 C   0  0  0  0  0  0  0  0  0  0  0  0
    3.8581   -3.7601    0.0000 O   0  0  0  0  0  0  0  0  0  0  0  0
  1  2  1  0
  2  3  1  0
  3  4  1  0
  4  5  1  0
  5  6  1  0
  6  7  1  0
  6 17  1  0
  7  8  1  0
  8  9  1  0
  9 10  1  0
 10 11  1  0
 11 12  2  0
 11 13  1  0
 13 14  1  0
 14 15  1  0
 15 16  1  0
 15  5  1  0
 15  9  1  0
 17 18  1  0
 17  2  1  0
 18 19  1  0
 19 20  1  0
 20 21  1  0
 20  2  1  0
M  END
>  <group_A>  (92) 
1

>  <group_B>  (92) 
0

>  <group_C>  (92) 
0

>  <group_D>  (92) 
0

>  <group_G>  (92) 
1

>  <group_H>  (92) 
0

>  <group_J>  (92) 
0

>  <group_L>  (92) 
0

>  <group_M>  (92) 
0

>  <group_N>  (92) 
0

>  <group_P>  (92) 
0

>  <group_R>  (92) 
0

>  <group_S>  (92) 
0

>  <group_V>  (92) 
0

$$$$

     RDKit          2D

 12 12  0  0  0  0  0  0  0  0999 V2000
   -0.8660   -1.5000    0.0000 O   0  0  0  0  0  0  0  0  0  0  0  0
    0.0000   -1.0000    0.0000 C   0  0  0  0  0  0  0  0  0  0  0  0
    0.0000    0.0000    0.0000 C   0  0  0  0  0  0  0  0  0  0  0  0
   -0.8660    0.5000    0.0000 O   0  0  0  0  0  0  0  0  0  0  0  0
   -0.8660    1.5000    0.0000 C   0  0  0  0  0  0  0  0  0  0  0  0
   -1.7321    2.0000    0.0000 O   0  0  0  0  0  0  0  0  0  0  0  0
   -0.0000    2.0000    0.0000 C   0  0  0  0  0  0  0  0  0  0  0  0
    0.0000    3.0000    0.0000 O   0  0  0  0  0  0  0  0  0  0  0  0
    0.8660    1.5000    0.0000 C   0  0  0  0  0  0  0  0  0  0  0  0
    1.7321    2.0000    0.0000 O   0  0  0  0  0  0  0  0  0  0  0  0
    0.8660    0.5000    0.0000 C   0  0  0  0  0  0  0  0  0  0  0  0
    1.7321    0.0000    0.0000 O   0  0  0  0  0  0  0  0  0  0  0  0
  1  2  1  0
  2  3  1  0
  3  4  1  0
  4  5  1  0
  5  6  1  0
  5  7  1  0
  7  8  1  0
  7  9  1  0
  9 10  1  0
  9 11  1  0
 11 12  1  0
 11  3  1  0
M  END
>  <group_A>  (93) 
1

>  <group_B>  (93) 
1

>  <group_C>  (93) 
1

>  <group_D>  (93) 
0

>  <group_G>  (93) 
1

>  <group_H>  (93) 
0

>  <group_J>  (93) 
0

>  <group_L>  (93) 
0

>  <group_M>  (93) 
1

>  <group_N>  (93) 
0

>  <group_P>  (93) 
0

>  <group_R>  (93) 
0

>  <group_S>  (93) 
1

>  <group_V>  (93) 
1

$$$$

     RDKit          2D

  9  8  0  0  0  0  0  0  0  0999 V2000
    3.4641   -0.0000    0.0000 C   0  0  0  0  0  0  0  0  0  0  0  0
    3.4641    1.0000    0.0000 S   0  0  0  0  0  0  0  0  0  0  0  0
    2.5981    1.5000    0.0000 C   0  0  0  0  0  0  0  0  0  0  0  0
    1.7321    1.0000    0.0000 C   0  0  0  0  0  0  0  0  0  0  0  0
    0.8660    1.5000    0.0000 C   0  0  0  0  0  0  0  0  0  0  0  0
    0.8660    2.5000    0.0000 N   0  0  0  0  0  0  0  0  0  0  0  0
   -0.0000    1.0000    0.0000 C   0  0  0  0  0  0  0  0  0  0  0  0
   -0.8660    1.5000    0.0000 O   0  0  0  0  0  0  0  0  0  0  0  0
   -0.0000   -0.0000    0.0000 O   0  0  0  0  0  0  0  0  0  0  0  0
  1  2  1  0
  2  3  1  0
  3  4  1  0
  4  5  1  0
  5  6  1  0
  5  7  1  0
  7  8  2  0
  7  9  1  0
M  END
>  <group_A>  (94) 
1

>  <group_B>  (94) 
1

>  <group_C>  (94) 
1

>  <group_D>  (94) 
0

>  <group_G>  (94) 
1

>  <group_H>  (94) 
0

>  <group_J>  (94) 
0

>  <group_L>  (94) 
0

>  <group_M>  (94) 
1

>  <group_N>  (94) 
0

>  <group_P>  (94) 
0

>  <group_R>  (94) 
0

>  <group_S>  (94) 
0

>  <group_V>  (94) 
1

$$$$

     RDKit          2D

  1  0  0  0  0  0  0  0  0  0999 V2000
    1.0000    0.0000    0.0000 Cu  0  0  0  0  0 15  0  0  0  0  0  0
M  CHG  1   1   2
M  END
>  <group_A>  (95) 
1

>  <group_B>  (95) 
1

>  <group_C>  (95) 
1

>  <group_D>  (95) 
1

>  <group_G>  (95) 
1

>  <group_H>  (95) 
0

>  <group_J>  (95) 
0

>  <group_L>  (95) 
0

>  <group_M>  (95) 
0

>  <group_N>  (95) 
1

>  <group_P>  (95) 
0

>  <group_R>  (95) 
1

>  <group_S>  (95) 
1

>  <group_V>  (95) 
1

$$$$

     RDKit          2D

  9  9  0  0  0  0  0  0  0  0999 V2000
   -1.7321    1.0000    0.0000 O   0  0  0  0  0  0  0  0  0  0  0  0
   -1.7321    0.0000    0.0000 C   0  0  0  0  0  0  0  0  0  0  0  0
   -0.8660   -0.5000    0.0000 C   0  0  0  0  0  0  0  0  0  0  0  0
    0.0000   -0.0000    0.0000 C   0  0  0  0  0  0  0  0  0  0  0  0
    0.0000    1.0000    0.0000 C   0  0  0  0  0  0  0  0  0  0  0  0
    0.8660    1.5000    0.0000 C   0  0  0  0  0  0  0  0  0  0  0  0
    1.7321    1.0000    0.0000 C   0  0  0  0  0  0  0  0  0  0  0  0
    1.7321   -0.0000    0.0000 C   0  0  0  0  0  0  0  0  0  0  0  0
    0.8660   -0.5000    0.0000 C   0  0  0  0  0  0  0  0  0  0  0  0
  1  2  2  0
  2  3  1  0
  3  4  1  0
  4  5  2  0
  5  6  1  0
  6  7  2  0
  7  8  1  0
  8  9  2  0
  9  4  1  0
M  END
>  <group_A>  (96) 
1

>  <group_B>  (96) 
0

>  <group_C>  (96) 
0

>  <group_D>  (96) 
0

>  <group_G>  (96) 
0

>  <group_H>  (96) 
0

>  <group_J>  (96) 
0

>  <group_L>  (96) 
0

>  <group_M>  (96) 
0

>  <group_N>  (96) 
0

>  <group_P>  (96) 
0

>  <group_R>  (96) 
0

>  <group_S>  (96) 
0

>  <group_V>  (96) 
0

$$$$

     RDKit          2D

  9  9  0  0  0  0  0  0  0  0999 V2000
   -1.7321    1.0000    0.0000 N   0  0  0  0  0  0  0  0  0  0  0  0
   -1.7321    0.0000    0.0000 C   0  0  0  0  0  0  0  0  0  0  0  0
   -0.8660   -0.5000    0.0000 C   0  0  0  0  0  0  0  0  0  0  0  0
    0.0000   -0.0000    0.0000 C   0  0  0  0  0  0  0  0  0  0  0  0
    0.0000    1.0000    0.0000 C   0  0  0  0  0  0  0  0  0  0  0  0
    0.8660    1.5000    0.0000 C   0  0  0  0  0  0  0  0  0  0  0  0
    1.7321    1.0000    0.0000 C   0  0  0  0  0  0  0  0  0  0  0  0
    1.7321   -0.0000    0.0000 C   0  0  0  0  0  0  0  0  0  0  0  0
    0.8660   -0.5000    0.0000 C   0  0  0  0  0  0  0  0  0  0  0  0
  1  2  1  0
  2  3  1  0
  3  4  1  0
  4  5  2  0
  5  6  1  0
  6  7  2  0
  7  8  1  0
  8  9  2  0
  9  4  1  0
M  CHG  1   1   1
M  END
>  <group_A>  (97) 
1

>  <group_B>  (97) 
0

>  <group_C>  (97) 
0

>  <group_D>  (97) 
0

>  <group_G>  (97) 
0

>  <group_H>  (97) 
0

>  <group_J>  (97) 
0

>  <group_L>  (97) 
0

>  <group_M>  (97) 
0

>  <group_N>  (97) 
0

>  <group_P>  (97) 
0

>  <group_R>  (97) 
0

>  <group_S>  (97) 
0

>  <group_V>  (97) 
0

$$$$

     RDKit          2D

 15 15  0  0  0  0  0  0  0  0999 V2000
    0.0000    1.0000    0.0000 N   0  0  0  0  0  0  0  0  0  0  0  0
    0.0000   -0.0000    0.0000 C   0  0  0  0  0  0  0  0  0  0  0  0
    0.8660   -0.5000    0.0000 C   0  0  0  0  0  0  0  0  0  0  0  0
    0.8660   -1.5000    0.0000 C   0  0  0  0  0  0  0  0  0  0  0  0
    1.7321   -2.0000    0.0000 C   0  0  0  0  0  0  0  0  0  0  0  0
    2.5981   -1.5000    0.0000 C   0  0  0  0  0  0  0  0  0  0  0  0
    3.4641   -2.0000    0.0000 N   0  0  0  0  0  0  0  0  0  0  0  0
    2.5981   -0.5000    0.0000 C   0  0  0  0  0  0  0  0  0  0  0  0
    3.4641   -0.0000    0.0000 O   0  0  0  0  0  0  0  0  0  0  0  0
    1.7321   -0.0000    0.0000 O   0  0  0  0  0  0  0  0  0  0  0  0
   -0.0000   -2.0000    0.0000 C   0  0  0  0  0  0  0  0  0  0  0  0
   -0.0000   -3.0000    0.0000 O   0  0  0  0  0  0  0  0  0  0  0  0
   -0.8660   -1.5000    0.0000 C   0  0  0  0  0  0  0  0  0  0  0  0
   -0.8660   -0.5000    0.0000 C   0  0  0  0  0  0  0  0  0  0  0  0
   -1.7321   -0.0000    0.0000 O   0  0  0  0  0  0  0  0  0  0  0  0
  1  2  1  0
  2  3  2  0
  3  4  1  0
  4  5  1  0
  4 11  2  0
  5  6  1  0
  6  7  1  0
  6  8  1  0
  8  9  2  0
  8 10  1  0
 11 12  1  0
 11 13  1  0
 13 14  2  0
 14 15  1  0
 14  2  1  0
M  END
>  <group_A>  (98) 
1

>  <group_B>  (98) 
0

>  <group_C>  (98) 
0

>  <group_D>  (98) 
0

>  <group_G>  (98) 
0

>  <group_H>  (98) 
0

>  <group_J>  (98) 
0

>  <group_L>  (98) 
0

>  <group_M>  (98) 
0

>  <group_N>  (98) 
0

>  <group_P>  (98) 
0

>  <group_R>  (98) 
0

>  <group_S>  (98) 
0

>  <group_V>  (98) 
0

$$$$

     RDKit          2D

  2  1  0  0  0  0  0  0  0  0999 V2000
    1.0000   -0.0000    0.0000 N   0  0  0  0  0  2  0  0  0  0  0  0
   -0.0000   -0.0000    0.0000 O   0  0  0  0  0  0  0  0  0  0  0  0
  1  2  2  0
M  RAD  1   1   2
M  END
>  <group_A>  (99) 
1

>  <group_B>  (99) 
1

>  <group_C>  (99) 
0

>  <group_D>  (99) 
0

>  <group_G>  (99) 
1

>  <group_H>  (99) 
0

>  <group_J>  (99) 
0

>  <group_L>  (99) 
0

>  <group_M>  (99) 
0

>  <group_N>  (99) 
0

>  <group_P>  (99) 
0

>  <group_R>  (99) 
0

>  <group_S>  (99) 
1

>  <group_V>  (99) 
0

$$$$

     RDKit          2D

  2  1  0  0  0  0  0  0  0  0999 V2000
    1.0000   -0.0000    0.0000 O   0  0  0  0  0  0  0  0  0  0  0  0
   -0.0000   -0.0000    0.0000 O   0  0  0  0  0  0  0  0  0  0  0  0
  1  2  1  0
M  END
>  <group_A>  (100) 
1

>  <group_B>  (100) 
1

>  <group_C>  (100) 
1

>  <group_D>  (100) 
0

>  <group_G>  (100) 
1

>  <group_H>  (100) 
0

>  <group_J>  (100) 
0

>  <group_L>  (100) 
0

>  <group_M>  (100) 
0

>  <group_N>  (100) 
0

>  <group_P>  (100) 
0

>  <group_R>  (100) 
0

>  <group_S>  (100) 
1

>  <group_V>  (100) 
1

$$$$

     RDKit          2D

 15 15  0  0  0  0  0  0  0  0999 V2000
    0.0000    1.0000    0.0000 N   0  0  0  0  0  0  0  0  0  0  0  0
    0.0000   -0.0000    0.0000 C   0  0  0  0  0  0  0  0  0  0  0  0
    0.8660   -0.5000    0.0000 C   0  0  0  0  0  0  0  0  0  0  0  0
    0.8660   -1.5000    0.0000 C   0  0  0  0  0  0  0  0  0  0  0  0
    1.7321   -2.0000    0.0000 C   0  0  0  0  0  0  0  0  0  0  0  0
    2.5981   -1.5000    0.0000 C   0  0  0  0  0  0  0  0  0  0  0  0
    3.4641   -2.0000    0.0000 N   0  0  0  0  0  0  0  0  0  0  0  0
    2.5981   -0.5000    0.0000 C   0  0  0  0  0  0  0  0  0  0  0  0
    3.4641   -0.0000    0.0000 O   0  0  0  0  0  0  0  0  0  0  0  0
    1.7321   -0.0000    0.0000 O   0  0  0  0  0  0  0  0  0  0  0  0
   -0.0000   -2.0000    0.0000 C   0  0  0  0  0  0  0  0  0  0  0  0
   -0.0000   -3.0000    0.0000 O   0  0  0  0  0  0  0  0  0  0  0  0
   -0.8660   -1.5000    0.0000 C   0  0  0  0  0  0  0  0  0  0  0  0
   -0.8660   -0.5000    0.0000 C   0  0  0  0  0  0  0  0  0  0  0  0
   -1.7321   -0.0000    0.0000 O   0  0  0  0  0  0  0  0  0  0  0  0
  1  2  2  0
  2  3  1  0
  3  4  2  0
  4  5  1  0
  4 11  1  0
  5  6  1  0
  6  7  1  0
  6  8  1  0
  8  9  2  0
  8 10  1  0
 11 12  2  0
 11 13  1  0
 13 14  2  0
 14 15  1  0
 14  2  1  0
M  END
>  <group_A>  (101) 
1

>  <group_B>  (101) 
0

>  <group_C>  (101) 
0

>  <group_D>  (101) 
0

>  <group_G>  (101) 
0

>  <group_H>  (101) 
0

>  <group_J>  (101) 
0

>  <group_L>  (101) 
0

>  <group_M>  (101) 
0

>  <group_N>  (101) 
0

>  <group_P>  (101) 
0

>  <group_R>  (101) 
0

>  <group_S>  (101) 
0

>  <group_V>  (101) 
0

$$$$

     RDKit          2D

  7  6  0  0  0  0  0  0  0  0999 V2000
    1.7321   -1.0000    0.0000 N   0  0  0  0  0  0  0  0  0  0  0  0
    1.7321   -0.0000    0.0000 C   0  0  0  0  0  0  0  0  0  0  0  0
    2.5981    0.5000    0.0000 C   0  0  0  0  0  0  0  0  0  0  0  0
    2.5981    1.5000    0.0000 S   0  0  0  0  0  0  0  0  0  0  0  0
    0.8660    0.5000    0.0000 C   0  0  0  0  0  0  0  0  0  0  0  0
    0.8660    1.5000    0.0000 O   0  0  0  0  0  0  0  0  0  0  0  0
    0.0000    0.0000    0.0000 O   0  0  0  0  0  0  0  0  0  0  0  0
  1  2  1  0
  2  3  1  0
  2  5  1  0
  3  4  1  0
  5  6  2  0
  5  7  1  0
M  END
>  <group_A>  (102) 
1

>  <group_B>  (102) 
1

>  <group_C>  (102) 
1

>  <group_D>  (102) 
0

>  <group_G>  (102) 
1

>  <group_H>  (102) 
0

>  <group_J>  (102) 
0

>  <group_L>  (102) 
0

>  <group_M>  (102) 
0

>  <group_N>  (102) 
0

>  <group_P>  (102) 
0

>  <group_R>  (102) 
0

>  <group_S>  (102) 
1

>  <group_V>  (102) 
1

$$$$

     RDKit          2D

  5  4  0  0  0  0  0  0  0  0999 V2000
    1.7321    1.0000    0.0000 O   0  0  0  0  0  0  0  0  0  0  0  0
    0.8660    1.5000    0.0000 C   0  0  0  0  0  0  0  0  0  0  0  0
    0.0000    1.0000    0.0000 C   0  0  0  0  0  0  0  0  0  0  0  0
   -0.8660    1.5000    0.0000 O   0  0  0  0  0  0  0  0  0  0  0  0
   -0.0000   -0.0000    0.0000 O   0  0  0  0  0  0  0  0  0  0  0  0
  1  2  2  0
  2  3  1  0
  3  4  2  0
  3  5  1  0
M  END
>  <group_A>  (103) 
1

>  <group_B>  (103) 
0

>  <group_C>  (103) 
0

>  <group_D>  (103) 
0

>  <group_G>  (103) 
0

>  <group_H>  (103) 
0

>  <group_J>  (103) 
0

>  <group_L>  (103) 
0

>  <group_M>  (103) 
0

>  <group_N>  (103) 
0

>  <group_P>  (103) 
0

>  <group_R>  (103) 
0

>  <group_S>  (103) 
0

>  <group_V>  (103) 
0

$$$$

     RDKit          2D

 12 11  0  0  0  0  0  0  0  0999 V2000
   -2.5981   -3.5000    0.0000 O   0  0  0  0  0  0  0  0  0  0  0  0
   -1.7321   -3.0000    0.0000 C   0  0  0  0  0  0  0  0  0  0  0  0
   -1.7321   -2.0000    0.0000 C   0  0  0  0  0  0  0  0  0  0  0  0
   -2.5981   -1.5000    0.0000 O   0  0  0  0  0  0  0  0  0  0  0  0
   -0.8660   -1.5000    0.0000 C   0  0  0  0  0  0  0  0  0  0  0  0
   -0.8660   -0.5000    0.0000 O   0  0  0  0  0  0  0  0  0  0  0  0
    0.0000   -2.0000    0.0000 C   0  0  0  0  0  0  0  0  0  0  0  0
    0.0000   -3.0000    0.0000 O   0  0  0  0  0  0  0  0  0  0  0  0
    0.8660   -1.5000    0.0000 C   0  0  0  0  0  0  0  0  0  0  0  0
    1.7321   -2.0000    0.0000 O   0  0  0  0  0  0  0  0  0  0  0  0
    0.8660   -0.5000    0.0000 C   0  0  0  0  0  0  0  0  0  0  0  0
    0.0000    0.0000    0.0000 O   0  0  0  0  0  0  0  0  0  0  0  0
  1  2  1  0
  2  3  1  0
  3  4  1  0
  3  5  1  0
  5  6  1  0
  5  7  1  0
  7  8  1  0
  7  9  1  0
  9 10  1  0
  9 11  1  0
 11 12  1  0
M  END
>  <group_A>  (104) 
1

>  <group_B>  (104) 
1

>  <group_C>  (104) 
1

>  <group_D>  (104) 
0

>  <group_G>  (104) 
0

>  <group_H>  (104) 
0

>  <group_J>  (104) 
0

>  <group_L>  (104) 
0

>  <group_M>  (104) 
0

>  <group_N>  (104) 
0

>  <group_P>  (104) 
0

>  <group_R>  (104) 
0

>  <group_S>  (104) 
0

>  <group_V>  (104) 
1

$$$$

     RDKit          2D

 30 32  0  0  0  0  0  0  0  0999 V2000
    3.4641   -2.0000    0.0000 C   0  0  0  0  0  0  0  0  0  0  0  0
    4.3301   -1.5000    0.0000 C   0  0  0  0  0  0  0  0  0  0  0  0
    4.3301   -0.5000    0.0000 C   0  0  0  0  0  0  0  0  0  0  0  0
    3.4641    0.0000    0.0000 C   0  0  0  0  0  0  0  0  0  0  0  0
    2.5981   -0.5000    0.0000 C   0  0  0  0  0  0  0  0  0  0  0  0
    1.7321    0.0000    0.0000 C   0  0  0  0  0  0  0  0  0  0  0  0
    1.7321    1.0000    0.0000 C   0  0  0  0  0  0  0  0  0  0  0  0
    0.8660    1.5000    0.0000 C   0  0  0  0  0  0  0  0  0  0  0  0
   -0.0000    1.0000    0.0000 C   0  0  0  0  0  0  0  0  0  0  0  0
    0.0000   -0.0000    0.0000 C   0  0  0  0  0  0  0  0  0  0  0  0
   -0.5878    0.8090    0.0000 C   0  0  0  0  0  0  0  0  0  0  0  0
    0.8660   -0.5000    0.0000 C   0  0  0  0  0  0  0  0  0  0  0  0
    0.6581   -1.4781    0.0000 C   0  0  0  0  0  0  0  0  0  0  0  0
   -0.3364   -1.5827    0.0000 C   0  0  0  0  0  0  0  0  0  0  0  0
   -0.7431   -0.6691    0.0000 C   0  0  0  0  0  0  0  0  0  0  0  0
   -1.7213   -0.4612    0.0000 C   0  0  0  0  0  0  0  0  0  0  0  0
   -2.0303    0.4898    0.0000 C   0  0  0  0  0  0  0  0  0  0  0  0
   -2.3904   -1.2044    0.0000 C   0  0  0  0  0  0  0  0  0  0  0  0
   -3.3686   -0.9965    0.0000 C   0  0  0  0  0  0  0  0  0  0  0  0
   -4.0377   -1.7396    0.0000 C   0  0  0  0  0  0  0  0  0  0  0  0
   -5.0158   -1.5317    0.0000 C   0  0  0  0  0  0  0  0  0  0  0  0
   -5.9669   -1.8407    0.0000 C   0  0  0  0  0  0  0  0  0  0  0  0
   -5.2238   -2.5098    0.0000 C   0  0  0  0  0  0  0  0  0  0  0  0
   -5.3249   -0.5806    0.0000 O   0  0  0  0  0  0  0  0  0  0  0  0
    5.1962    0.0000    0.0000 C   0  0  0  0  0  0  0  0  0  0  0  0
    6.0622   -0.5000    0.0000 C   0  0  0  0  0  0  0  0  0  0  0  0
    6.9282    0.0000    0.0000 O   0  0  0  0  0  0  0  0  0  0  0  0
    6.0622   -1.5000    0.0000 C   0  0  0  0  0  0  0  0  0  0  0  0
    5.1962   -2.0000    0.0000 C   0  0  0  0  0  0  0  0  0  0  0  0
    5.1962   -3.0000    0.0000 O   0  0  0  0  0  0  0  0  0  0  0  0
  1  2  2  0
  2  3  1  0
  3  4  2  3
  3 25  1  0
  4  5  1  0
  5  6  2  3
  6  7  1  0
  7  8  1  0
  8  9  1  0
  9 10  1  0
 10 11  1  0
 10 12  1  0
 12 13  1  0
 12  6  1  0
 13 14  1  0
 14 15  1  0
 15 16  1  0
 15 10  1  0
 16 17  1  0
 16 18  1  0
 18 19  1  0
 19 20  1  0
 20 21  1  0
 21 22  1  0
 21 23  1  0
 21 24  1  0
 25 26  1  0
 26 27  1  0
 26 28  1  0
 28 29  1  0
 29 30  1  0
 29  2  1  0
M  END
>  <group_A>  (105) 
1

>  <group_B>  (105) 
0

>  <group_C>  (105) 
0

>  <group_D>  (105) 
1

>  <group_G>  (105) 
0

>  <group_H>  (105) 
0

>  <group_J>  (105) 
0

>  <group_L>  (105) 
0

>  <group_M>  (105) 
0

>  <group_N>  (105) 
0

>  <group_P>  (105) 
0

>  <group_R>  (105) 
0

>  <group_S>  (105) 
0

>  <group_V>  (105) 
0

$$$$

     RDKit          2D

 44 47  0  0  0  0  0  0  0  0999 V2000
   -5.1962    0.0000    0.0000 C   0  0  0  0  0  0  0  0  0  0  0  0
   -5.1962   -1.0000    0.0000 C   0  0  0  0  0  0  0  0  0  0  0  0
   -4.3301   -1.5000    0.0000 O   0  0  0  0  0  0  0  0  0  0  0  0
   -4.3301   -2.5000    0.0000 C   0  0  0  0  0  0  0  0  0  0  0  0
   -3.4641   -3.0000    0.0000 O   0  0  0  0  0  0  0  0  0  0  0  0
   -2.5981   -2.5000    0.0000 C   0  0  0  0  0  0  0  0  0  0  0  0
   -2.5981   -1.5000    0.0000 C   0  0  0  0  0  0  0  0  0  0  0  0
   -3.4641   -1.0000    0.0000 C   0  0  0  0  0  0  0  0  0  0  0  0
   -3.4641    0.0000    0.0000 O   0  0  0  0  0  0  0  0  0  0  0  0
   -1.7321   -1.0000    0.0000 O   0  0  0  0  0  0  0  0  0  0  0  0
   -0.8660   -1.5000    0.0000 C   0  0  0  0  0  0  0  0  0  0  0  0
   -0.0000   -1.0000    0.0000 O   0  0  0  0  0  0  0  0  0  0  0  0
    0.0000   -0.0000    0.0000 C   0  0  0  0  0  0  0  0  0  0  0  0
    0.8660    0.5000    0.0000 C   0  0  0  0  0  0  0  0  0  0  0  0
    1.7321   -0.0000    0.0000 C   0  0  0  0  0  0  0  0  0  0  0  0
    2.5981    0.5000    0.0000 O   0  0  0  0  0  0  0  0  0  0  0  0
    0.8660    1.5000    0.0000 O   0  0  0  0  0  0  0  0  0  0  0  0
    0.0000    2.0000    0.0000 C   0  0  0  0  0  0  0  0  0  0  0  0
    0.0000    3.0000    0.0000 O   0  0  0  0  0  0  0  0  0  0  0  0
   -0.8660    1.5000    0.0000 C   0  0  0  0  0  0  0  0  0  0  0  0
   -1.7321    2.0000    0.0000 O   0  0  0  0  0  0  0  0  0  0  0  0
   -0.8660    0.5000    0.0000 C   0  0  0  0  0  0  0  0  0  0  0  0
   -1.7321    0.0000    0.0000 O   0  0  0  0  0  0  0  0  0  0  0  0
   -0.8660   -2.5000    0.0000 C   0  0  0  0  0  0  0  0  0  0  0  0
   -0.0000   -3.0000    0.0000 O   0  0  0  0  0  0  0  0  0  0  0  0
   -1.7321   -3.0000    0.0000 C   0  0  0  0  0  0  0  0  0  0  0  0
   -1.7321   -4.0000    0.0000 O   0  0  0  0  0  0  0  0  0  0  0  0
   -5.1962   -3.0000    0.0000 C   0  0  0  0  0  0  0  0  0  0  0  0
   -5.1962   -4.0000    0.0000 O   0  0  0  0  0  0  0  0  0  0  0  0
   -6.0622   -2.5000    0.0000 C   0  0  0  0  0  0  0  0  0  0  0  0
   -6.9282   -3.0000    0.0000 O   0  0  0  0  0  0  0  0  0  0  0  0
   -6.0622   -1.5000    0.0000 C   0  0  0  0  0  0  0  0  0  0  0  0
   -6.9282   -1.0000    0.0000 N   0  0  0  0  0  0  0  0  0  0  0  0
   -6.9282    0.0000    0.0000 C   0  0  0  0  0  0  0  0  0  0  0  0
   -6.0622    0.5000    0.0000 C   0  0  0  0  0  0  0  0  0  0  0  0
   -6.0622    1.5000    0.0000 C   0  0  0  0  0  0  0  0  0  0  0  0
   -5.1962    2.0000    0.0000 C   0  0  0  0  0  0  0  0  0  0  0  0
   -5.1962    3.0000    0.0000 O   0  0  0  0  0  0  0  0  0  0  0  0
   -6.9282    2.0000    0.0000 C   0  0  0  0  0  0  0  0  0  0  0  0
   -6.9282    3.0000    0.0000 O   0  0  0  0  0  0  0  0  0  0  0  0
   -7.7942    1.5000    0.0000 C   0  0  0  0  0  0  0  0  0  0  0  0
   -8.6603    2.0000    0.0000 O   0  0  0  0  0  0  0  0  0  0  0  0
   -7.7942    0.5000    0.0000 C   0  0  0  0  0  0  0  0  0  0  0  0
   -8.6603    0.0000    0.0000 O   0  0  0  0  0  0  0  0  0  0  0  0
  1  2  1  0
  2  3  1  0
  3  4  1  0
  4  5  1  0
  4 28  1  0
  5  6  1  0
  6  7  1  0
  7  8  1  0
  7 10  1  0
  8  9  1  0
 10 11  1  0
 11 12  1  0
 11 24  1  0
 12 13  1  0
 13 14  1  0
 14 15  1  0
 14 17  1  0
 15 16  1  0
 17 18  1  0
 18 19  1  0
 18 20  1  0
 20 21  1  0
 20 22  1  0
 22 23  1  0
 22 13  1  0
 24 25  1  0
 24 26  1  0
 26 27  1  0
 26  6  1  0
 28 29  1  0
 28 30  1  0
 30 31  1  0
 30 32  1  0
 32 33  1  0
 32  2  1  0
 33 34  1  0
 34 35  1  0
 35 36  2  0
 36 37  1  0
 36 39  1  0
 37 38  1  0
 39 40  1  0
 39 41  1  0
 41 42  1  0
 41 43  1  0
 43 44  1  0
 43 34  1  0
M  END
>  <group_A>  (106) 
1

>  <group_B>  (106) 
1

>  <group_C>  (106) 
1

>  <group_D>  (106) 
0

>  <group_G>  (106) 
0

>  <group_H>  (106) 
0

>  <group_J>  (106) 
0

>  <group_L>  (106) 
0

>  <group_M>  (106) 
0

>  <group_N>  (106) 
0

>  <group_P>  (106) 
0

>  <group_R>  (106) 
0

>  <group_S>  (106) 
0

>  <group_V>  (106) 
1

$$$$

     RDKit          2D

  6  5  0  0  0  0  0  0  0  0999 V2000
    1.7321    0.0000    0.0000 C   0  0  0  0  0  0  0  0  0  0  0  0
    1.7321    1.0000    0.0000 C   0  0  0  0  0  0  0  0  0  0  0  0
    0.8660    1.5000    0.0000 S   0  0  0  0  0  0  0  0  0  0  0  0
   -0.0000    1.0000    0.0000 C   0  0  0  0  0  0  0  0  0  0  0  0
   -0.8660    1.5000    0.0000 N   0  0  0  0  0  0  0  0  0  0  0  0
   -0.0000   -0.0000    0.0000 N   0  0  0  0  0  0  0  0  0  0  0  0
  1  2  1  0
  2  3  1  0
  3  4  1  0
  4  5  2  0
  4  6  1  0
M  END
>  <group_A>  (107) 
1

>  <group_B>  (107) 
0

>  <group_C>  (107) 
0

>  <group_D>  (107) 
0

>  <group_G>  (107) 
1

>  <group_H>  (107) 
0

>  <group_J>  (107) 
0

>  <group_L>  (107) 
0

>  <group_M>  (107) 
0

>  <group_N>  (107) 
0

>  <group_P>  (107) 
0

>  <group_R>  (107) 
0

>  <group_S>  (107) 
1

>  <group_V>  (107) 
0

$$$$

     RDKit          2D

 33 35  0  0  0  0  0  0  0  0999 V2000
    3.4641   -0.0000    0.0000 C   0  0  0  0  0  0  0  0  0  0  0  0
    3.4641   -1.0000    0.0000 N   0  0  0  0  0  0  0  0  0  0  0  0
    2.5981   -1.5000    0.0000 C   0  0  0  0  0  0  0  0  0  0  0  0
    1.7321   -1.0000    0.0000 C   0  0  0  0  0  0  0  0  0  0  0  0
    0.8660   -1.5000    0.0000 C   0  0  0  0  0  0  0  0  0  0  0  0
    0.0000   -1.0000    0.0000 N   0  0  0  0  0  0  0  0  0  0  0  0
    0.0000   -0.0000    0.0000 C   0  0  0  0  0  0  0  0  0  0  0  0
   -0.8660    0.5000    0.0000 N   0  0  0  0  0  0  0  0  0  0  0  0
   -0.8660    1.5000    0.0000 C   0  0  0  0  0  0  0  0  0  0  0  0
   -1.7321    2.0000    0.0000 N   0  0  0  0  0  0  0  0  0  0  0  0
   -0.0000    2.0000    0.0000 N   0  0  0  0  0  0  0  0  0  0  0  0
    0.8660    1.5000    0.0000 C   0  0  0  0  0  0  0  0  0  0  0  0
    1.7321    2.0000    0.0000 N   0  0  0  0  0  0  0  0  0  0  0  0
    0.8660    0.5000    0.0000 C   0  0  0  0  0  0  0  0  0  0  0  0
    1.7321    0.0000    0.0000 N   0  0  0  0  0  0  0  0  0  0  0  0
    4.3301   -1.5000    0.0000 C   0  0  0  0  0  0  0  0  0  0  0  0
    5.1962   -1.0000    0.0000 C   0  0  0  0  0  0  0  0  0  0  0  0
    6.0622   -1.5000    0.0000 C   0  0  0  0  0  0  0  0  0  0  0  0
    6.0622   -2.5000    0.0000 C   0  0  0  0  0  0  0  0  0  0  0  0
    6.9282   -3.0000    0.0000 C   0  0  0  0  0  0  0  0  0  0  0  0
    6.9282   -4.0000    0.0000 O   0  0  0  0  0  0  0  0  0  0  0  0
    7.7942   -2.5000    0.0000 N   0  0  0  0  0  0  0  0  0  0  0  0
    8.6603   -3.0000    0.0000 C   0  0  0  0  0  0  0  0  0  0  0  0
    8.6603   -4.0000    0.0000 C   0  0  0  0  0  0  0  0  0  0  0  0
    9.5263   -4.5000    0.0000 C   0  0  0  0  0  0  0  0  0  0  0  0
    9.5263   -5.5000    0.0000 C   0  0  0  0  0  0  0  0  0  0  0  0
   10.3923   -6.0000    0.0000 O   0  0  0  0  0  0  0  0  0  0  0  0
    8.6603   -6.0000    0.0000 O   0  0  0  0  0  0  0  0  0  0  0  0
    9.5263   -2.5000    0.0000 C   0  0  0  0  0  0  0  0  0  0  0  0
   10.3923   -3.0000    0.0000 O   0  0  0  0  0  0  0  0  0  0  0  0
    9.5263   -1.5000    0.0000 O   0  0  0  0  0  0  0  0  0  0  0  0
    5.1962   -3.0000    0.0000 C   0  0  0  0  0  0  0  0  0  0  0  0
    4.3301   -2.5000    0.0000 C   0  0  0  0  0  0  0  0  0  0  0  0
  1  2  1  0
  2  3  1  0
  2 16  1  0
  3  4  1  0
  4  5  2  0
  5  6  1  0
  6  7  2  0
  7  8  1  0
  8  9  2  0
  9 10  1  0
  9 11  1  0
 11 12  2  0
 12 13  1  0
 12 14  1  0
 14 15  2  0
 14  7  1  0
 15  4  1  0
 16 17  2  0
 17 18  1  0
 18 19  2  0
 19 20  1  0
 19 32  1  0
 20 21  2  0
 20 22  1  0
 22 23  1  0
 23 24  1  0
 23 29  1  0
 24 25  1  0
 25 26  1  0
 26 27  2  0
 26 28  1  0
 29 30  2  0
 29 31  1  0
 32 33  2  0
 33 16  1  0
M  END
>  <group_A>  (108) 
0

>  <group_B>  (108) 
0

>  <group_C>  (108) 
0

>  <group_D>  (108) 
0

>  <group_G>  (108) 
0

>  <group_H>  (108) 
0

>  <group_J>  (108) 
0

>  <group_L>  (108) 
1

>  <group_M>  (108) 
0

>  <group_N>  (108) 
0

>  <group_P>  (108) 
0

>  <group_R>  (108) 
0

>  <group_S>  (108) 
0

>  <group_V>  (108) 
0

$$$$

     RDKit          2D

 48 52  0  0  0  0  0  0  0  0999 V2000
    4.2053   -4.5343    0.0000 N   0  0  0  0  0  0  0  0  0  0  0  0
    3.7986   -5.4478    0.0000 C   0  0  0  0  0  0  0  0  0  0  0  0
    4.3864   -6.2568    0.0000 O   0  0  0  0  0  0  0  0  0  0  0  0
    2.8041   -5.5523    0.0000 C   0  0  0  0  0  0  0  0  0  0  0  0
    2.2163   -4.7433    0.0000 C   0  0  0  0  0  0  0  0  0  0  0  0
    1.2218   -4.8479    0.0000 N   0  0  0  0  0  0  0  0  0  0  0  0
    0.6340   -4.0388    0.0000 C   0  0  0  0  0  0  0  0  0  0  0  0
    0.9430   -3.0878    0.0000 O   0  0  0  0  0  0  0  0  0  0  0  0
    0.1340   -2.5000    0.0000 C   0  0  0  0  0  0  0  0  0  0  0  0
    0.1340   -1.5000    0.0000 C   0  0  0  0  0  0  0  0  0  0  0  0
    1.0000   -1.0000    0.0000 O   0  0  0  0  0  0  0  0  0  0  0  0
    1.0000   -0.0000    0.0000 P   0  0  0  0  0  0  0  0  0  0  0  0
    2.0000   -0.0000    0.0000 O   0  0  0  0  0  0  0  0  0  0  0  0
    1.0000    1.0000    0.0000 O   0  0  0  0  0  0  0  0  0  0  0  0
    0.0000   -0.0000    0.0000 O   0  0  0  0  0  0  0  0  0  0  0  0
   -1.0000   -0.0000    0.0000 P   0  0  0  0  0  0  0  0  0  0  0  0
   -1.0000   -1.0000    0.0000 O   0  0  0  0  0  0  0  0  0  0  0  0
   -2.0000   -0.0000    0.0000 O   0  0  0  0  0  0  0  0  0  0  0  0
   -1.0000    1.0000    0.0000 O   0  0  0  0  0  0  0  0  0  0  0  0
   -1.8660    1.5000    0.0000 C   0  0  0  0  0  0  0  0  0  0  0  0
   -2.7321    1.0000    0.0000 C   0  0  0  0  0  0  0  0  0  0  0  0
   -2.8366    0.0055    0.0000 O   0  0  0  0  0  0  0  0  0  0  0  0
   -3.8147   -0.2024    0.0000 C   0  0  0  0  0  0  0  0  0  0  0  0
   -4.2215   -1.1160    0.0000 N   0  0  0  0  0  0  0  0  0  0  0  0
   -5.1996   -1.3239    0.0000 C   0  0  0  0  0  0  0  0  0  0  0  0
   -5.3041   -2.3184    0.0000 N   0  0  0  0  0  0  0  0  0  0  0  0
   -4.3906   -2.7251    0.0000 C   0  0  0  0  0  0  0  0  0  0  0  0
   -4.0816   -3.6762    0.0000 C   0  0  0  0  0  0  0  0  0  0  0  0
   -4.7507   -4.4194    0.0000 N   0  0  0  0  0  0  0  0  0  0  0  0
   -3.1034   -3.8841    0.0000 N   0  0  0  0  0  0  0  0  0  0  0  0
   -2.4343   -3.1410    0.0000 C   0  0  0  0  0  0  0  0  0  0  0  0
   -2.7433   -2.1899    0.0000 N   0  0  0  0  0  0  0  0  0  0  0  0
   -3.7215   -1.9820    0.0000 C   0  0  0  0  0  0  0  0  0  0  0  0
   -4.3147    0.6636    0.0000 C   0  0  0  0  0  0  0  0  0  0  0  0
   -5.3092    0.7681    0.0000 O   0  0  0  0  0  0  0  0  0  0  0  0
   -5.8970   -0.0409    0.0000 P   0  0  0  0  0  0  0  0  0  0  0  0
   -6.7061    0.5469    0.0000 O   0  0  0  0  0  0  0  0  0  0  0  0
   -6.4848   -0.8499    0.0000 O   0  0  0  0  0  0  0  0  0  0  0  0
   -5.0880   -0.6287    0.0000 O   0  0  0  0  0  0  0  0  0  0  0  0
   -3.6456    1.4067    0.0000 C   0  0  0  0  0  0  0  0  0  0  0  0
   -3.8535    2.3849    0.0000 O   0  0  0  0  0  0  0  0  0  0  0  0
   -0.6750   -3.0878    0.0000 C   0  0  0  0  0  0  0  0  0  0  0  0
   -1.6261   -2.7788    0.0000 O   0  0  0  0  0  0  0  0  0  0  0  0
   -0.3660   -4.0388    0.0000 C   0  0  0  0  0  0  0  0  0  0  0  0
   -0.9538   -4.8479    0.0000 O   0  0  0  0  0  0  0  0  0  0  0  0
    0.8150   -5.7614    0.0000 C   0  0  0  0  0  0  0  0  0  0  0  0
    1.4028   -6.5704    0.0000 C   0  0  0  0  0  0  0  0  0  0  0  0
    2.3973   -6.4659    0.0000 C   0  0  0  0  0  0  0  0  0  0  0  0
  1  2  1  0
  2  3  2  0
  2  4  1  0
  4  5  2  0
  5  6  1  0
  6  7  1  0
  6 46  1  0
  7  8  1  0
  8  9  1  0
  9 10  1  0
  9 42  1  0
 10 11  1  0
 11 12  1  0
 12 13  2  0
 12 14  1  0
 12 15  1  0
 15 16  1  0
 16 17  2  0
 16 18  1  0
 16 19  1  0
 19 20  1  0
 20 21  1  0
 21 22  1  0
 22 23  1  0
 23 24  1  0
 23 34  1  0
 24 25  1  0
 25 26  2  0
 26 27  1  0
 27 28  2  0
 28 29  1  0
 28 30  1  0
 30 31  2  0
 31 32  1  0
 32 33  2  0
 33 24  1  0
 33 27  1  0
 34 35  1  0
 34 40  1  0
 35 36  1  0
 36 37  2  0
 36 38  1  0
 36 39  1  0
 40 41  1  0
 40 21  1  0
 42 43  1  0
 42 44  1  0
 44 45  1  0
 44  7  1  0
 46 47  2  0
 47 48  1  0
 48  4  1  0
M  END
>  <group_A>  (109) 
1

>  <group_B>  (109) 
1

>  <group_C>  (109) 
1

>  <group_D>  (109) 
1

>  <group_G>  (109) 
1

>  <group_H>  (109) 
0

>  <group_J>  (109) 
1

>  <group_L>  (109) 
1

>  <group_M>  (109) 
0

>  <group_N>  (109) 
0

>  <group_P>  (109) 
1

>  <group_R>  (109) 
0

>  <group_S>  (109) 
1

>  <group_V>  (109) 
1

$$$$

     RDKit          2D

 21 22  0  0  0  0  0  0  0  0999 V2000
    4.3301   -1.5000    0.0000 C   0  0  0  0  0  0  0  0  0  0  0  0
    4.3301   -0.5000    0.0000 O   0  0  0  0  0  0  0  0  0  0  0  0
    3.4641   -0.0000    0.0000 C   0  0  0  0  0  0  0  0  0  0  0  0
    2.5981   -0.5000    0.0000 C   0  0  0  0  0  0  0  0  0  0  0  0
    1.7321    0.0000    0.0000 C   0  0  0  0  0  0  0  0  0  0  0  0
    0.8660   -0.5000    0.0000 C   0  0  0  0  0  0  0  0  0  0  0  0
    0.0000    0.0000    0.0000 C   0  0  0  0  0  0  0  0  0  0  0  0
   -0.8660   -0.5000    0.0000 C   0  0  0  0  0  0  0  0  0  0  0  0
   -1.7321   -0.0000    0.0000 N   0  0  0  0  0  0  0  0  0  0  0  0
   -1.7321    1.0000    0.0000 C   0  0  0  0  0  0  0  0  0  0  0  0
   -2.5981    1.5000    0.0000 N   0  0  0  0  0  0  0  0  0  0  0  0
   -0.8660    1.5000    0.0000 N   0  0  0  0  0  0  0  0  0  0  0  0
   -0.0000    1.0000    0.0000 C   0  0  0  0  0  0  0  0  0  0  0  0
    0.8660    1.5000    0.0000 N   0  0  0  0  0  0  0  0  0  0  0  0
    1.7321    1.0000    0.0000 C   0  0  0  0  0  0  0  0  0  0  0  0
    2.5981    1.5000    0.0000 C   0  0  0  0  0  0  0  0  0  0  0  0
    2.5981    2.5000    0.0000 O   0  0  0  0  0  0  0  0  0  0  0  0
    1.7321    3.0000    0.0000 C   0  0  0  0  0  0  0  0  0  0  0  0
    3.4641    1.0000    0.0000 C   0  0  0  0  0  0  0  0  0  0  0  0
    4.3301    1.5000    0.0000 O   0  0  0  0  0  0  0  0  0  0  0  0
    4.3301    2.5000    0.0000 C   0  0  0  0  0  0  0  0  0  0  0  0
  1  2  1  0
  2  3  1  0
  3  4  2  0
  4  5  1  0
  5  6  1  0
  5 15  2  0
  6  7  1  0
  7  8  2  0
  8  9  1  0
  9 10  2  0
 10 11  1  0
 10 12  1  0
 12 13  2  0
 13 14  1  0
 13  7  1  0
 15 16  1  0
 16 17  1  0
 16 19  2  0
 17 18  1  0
 19 20  1  0
 19  3  1  0
 20 21  1  0
M  END
>  <group_A>  (110) 
1

>  <group_B>  (110) 
0

>  <group_C>  (110) 
0

>  <group_D>  (110) 
0

>  <group_G>  (110) 
0

>  <group_H>  (110) 
0

>  <group_J>  (110) 
1

>  <group_L>  (110) 
0

>  <group_M>  (110) 
0

>  <group_N>  (110) 
0

>  <group_P>  (110) 
0

>  <group_R>  (110) 
0

>  <group_S>  (110) 
0

>  <group_V>  (110) 
0

$$$$

     RDKit          2D

  1  0  0  0  0  0  0  0  0  0999 V2000
    1.0000    0.0000    0.0000 Li  0  0  0  0  0 15  0  0  0  0  0  0
M  CHG  1   1   1
M  END
>  <group_A>  (111) 
1

>  <group_B>  (111) 
0

>  <group_C>  (111) 
0

>  <group_D>  (111) 
0

>  <group_G>  (111) 
1

>  <group_H>  (111) 
0

>  <group_J>  (111) 
0

>  <group_L>  (111) 
0

>  <group_M>  (111) 
0

>  <group_N>  (111) 
1

>  <group_P>  (111) 
0

>  <group_R>  (111) 
0

>  <group_S>  (111) 
1

>  <group_V>  (111) 
1

$$$$

     RDKit          2D

  1  0  0  0  0  0  0  0  0  0999 V2000
    1.0000    0.0000    0.0000 Rb  0  0  0  0  0 15  0  0  0  0  0  0
M  CHG  1   1   1
M  END
>  <group_A>  (112) 
1

>  <group_B>  (112) 
0

>  <group_C>  (112) 
0

>  <group_D>  (112) 
0

>  <group_G>  (112) 
0

>  <group_H>  (112) 
0

>  <group_J>  (112) 
0

>  <group_L>  (112) 
0

>  <group_M>  (112) 
0

>  <group_N>  (112) 
0

>  <group_P>  (112) 
0

>  <group_R>  (112) 
0

>  <group_S>  (112) 
0

>  <group_V>  (112) 
0

$$$$

     RDKit          2D

  9  9  0  0  0  0  0  0  0  0999 V2000
   -0.8660   -1.5000    0.0000 O   0  0  0  0  0  0  0  0  0  0  0  0
   -0.0000   -1.0000    0.0000 C   0  0  0  0  0  0  0  0  0  0  0  0
    0.8660   -1.5000    0.0000 O   0  0  0  0  0  0  0  0  0  0  0  0
    0.0000    0.0000    0.0000 C   0  0  0  0  0  0  0  0  0  0  0  0
   -0.8660    0.5000    0.0000 C   0  0  0  0  0  0  0  0  0  0  0  0
   -0.8660    1.5000    0.0000 C   0  0  0  0  0  0  0  0  0  0  0  0
    0.0000    2.0000    0.0000 C   0  0  0  0  0  0  0  0  0  0  0  0
    0.8660    1.5000    0.0000 C   0  0  0  0  0  0  0  0  0  0  0  0
    0.8660    0.5000    0.0000 C   0  0  0  0  0  0  0  0  0  0  0  0
  1  2  2  0
  2  3  1  0
  2  4  1  0
  4  5  2  0
  5  6  1  0
  6  7  2  0
  7  8  1  0
  8  9  2  0
  9  4  1  0
M  END
>  <group_A>  (113) 
1

>  <group_B>  (113) 
1

>  <group_C>  (113) 
1

>  <group_D>  (113) 
0

>  <group_G>  (113) 
1

>  <group_H>  (113) 
0

>  <group_J>  (113) 
0

>  <group_L>  (113) 
0

>  <group_M>  (113) 
1

>  <group_N>  (113) 
0

>  <group_P>  (113) 
0

>  <group_R>  (113) 
0

>  <group_S>  (113) 
1

>  <group_V>  (113) 
1

$$$$

     RDKit          2D

 12 12  0  0  0  0  0  0  0  0999 V2000
   -0.8660   -1.5000    0.0000 O   0  0  0  0  0  0  0  0  0  0  0  0
    0.0000   -1.0000    0.0000 C   0  0  0  0  0  0  0  0  0  0  0  0
    0.0000    0.0000    0.0000 C   0  0  0  0  0  0  0  0  0  0  0  0
   -0.8660    0.5000    0.0000 O   0  0  0  0  0  0  0  0  0  0  0  0
   -0.8660    1.5000    0.0000 C   0  0  0  0  0  0  0  0  0  0  0  0
   -1.7321    2.0000    0.0000 O   0  0  0  0  0  0  0  0  0  0  0  0
   -0.0000    2.0000    0.0000 C   0  0  0  0  0  0  0  0  0  0  0  0
    0.0000    3.0000    0.0000 O   0  0  0  0  0  0  0  0  0  0  0  0
    0.8660    1.5000    0.0000 C   0  0  0  0  0  0  0  0  0  0  0  0
    1.7321    2.0000    0.0000 O   0  0  0  0  0  0  0  0  0  0  0  0
    0.8660    0.5000    0.0000 C   0  0  0  0  0  0  0  0  0  0  0  0
    1.7321    0.0000    0.0000 O   0  0  0  0  0  0  0  0  0  0  0  0
  1  2  1  0
  2  3  1  0
  3  4  1  0
  4  5  1  0
  5  6  1  0
  5  7  1  0
  7  8  1  0
  7  9  1  0
  9 10  1  0
  9 11  1  0
 11 12  1  0
 11  3  1  0
M  END
>  <group_A>  (114) 
1

>  <group_B>  (114) 
1

>  <group_C>  (114) 
1

>  <group_D>  (114) 
0

>  <group_G>  (114) 
1

>  <group_H>  (114) 
0

>  <group_J>  (114) 
0

>  <group_L>  (114) 
0

>  <group_M>  (114) 
1

>  <group_N>  (114) 
0

>  <group_P>  (114) 
0

>  <group_R>  (114) 
0

>  <group_S>  (114) 
1

>  <group_V>  (114) 
1

$$$$

     RDKit          2D

  8  7  0  0  0  0  0  0  0  0999 V2000
    2.5981   -1.5000    0.0000 O   0  0  0  0  0  0  0  0  0  0  0  0
    2.5981   -0.5000    0.0000 C   0  0  0  0  0  0  0  0  0  0  0  0
    3.4641    0.0000    0.0000 C   0  0  0  0  0  0  0  0  0  0  0  0
    3.4641    1.0000    0.0000 S   0  0  0  0  0  0  0  0  0  0  0  0
    1.7321    0.0000    0.0000 C   0  0  0  0  0  0  0  0  0  0  0  0
    1.7321    1.0000    0.0000 O   0  0  0  0  0  0  0  0  0  0  0  0
    0.8660   -0.5000    0.0000 C   0  0  0  0  0  0  0  0  0  0  0  0
    0.0000    0.0000    0.0000 S   0  0  0  0  0  0  0  0  0  0  0  0
  1  2  1  0
  2  3  1  0
  2  5  1  0
  3  4  1  0
  5  6  1  0
  5  7  1  0
  7  8  1  0
M  END
>  <group_A>  (115) 
1

>  <group_B>  (115) 
1

>  <group_C>  (115) 
0

>  <group_D>  (115) 
0

>  <group_G>  (115) 
1

>  <group_H>  (115) 
0

>  <group_J>  (115) 
0

>  <group_L>  (115) 
1

>  <group_M>  (115) 
0

>  <group_N>  (115) 
0

>  <group_P>  (115) 
0

>  <group_R>  (115) 
0

>  <group_S>  (115) 
1

>  <group_V>  (115) 
1

$$$$

     RDKit          2D

 44 48  0  0  0  0  0  0  0  0999 V2000
   -8.2930   -1.5839    0.0000 N   0  0  0  0  0  0  0  0  0  0  0  0
   -7.4840   -0.9961    0.0000 C   0  0  0  0  0  0  0  0  0  0  0  0
   -7.5885   -0.0015    0.0000 O   0  0  0  0  0  0  0  0  0  0  0  0
   -6.5704   -1.4028    0.0000 C   0  0  0  0  0  0  0  0  0  0  0  0
   -6.4659   -2.3973    0.0000 C   0  0  0  0  0  0  0  0  0  0  0  0
   -5.5523   -2.8041    0.0000 C   0  0  0  0  0  0  0  0  0  0  0  0
   -4.7433   -2.2163    0.0000 C   0  0  0  0  0  0  0  0  0  0  0  0
   -4.8479   -1.2218    0.0000 N   0  0  0  0  0  0  0  0  0  0  0  0
   -4.0388   -0.6340    0.0000 C   0  0  0  0  0  0  0  0  0  0  0  0
   -3.0878   -0.9430    0.0000 O   0  0  0  0  0  0  0  0  0  0  0  0
   -2.5000   -0.1340    0.0000 C   0  0  0  0  0  0  0  0  0  0  0  0
   -1.5000   -0.1340    0.0000 C   0  0  0  0  0  0  0  0  0  0  0  0
   -1.0000   -1.0000    0.0000 O   0  0  0  0  0  0  0  0  0  0  0  0
    0.0000   -1.0000    0.0000 P   0  0  0  0  0  0  0  0  0  0  0  0
   -0.0000   -2.0000    0.0000 O   0  0  0  0  0  0  0  0  0  0  0  0
    1.0000   -1.0000    0.0000 O   0  0  0  0  0  0  0  0  0  0  0  0
    0.0000   -0.0000    0.0000 O   0  0  0  0  0  0  0  0  0  0  0  0
   -0.0000    1.0000    0.0000 P   0  0  0  0  0  0  0  0  0  0  0  0
   -1.0000    1.0000    0.0000 O   0  0  0  0  0  0  0  0  0  0  0  0
   -0.0000    2.0000    0.0000 O   0  0  0  0  0  0  0  0  0  0  0  0
    1.0000    1.0000    0.0000 O   0  0  0  0  0  0  0  0  0  0  0  0
    1.5000    1.8660    0.0000 C   0  0  0  0  0  0  0  0  0  0  0  0
    1.0000    2.7321    0.0000 C   0  0  0  0  0  0  0  0  0  0  0  0
    0.0055    2.8366    0.0000 O   0  0  0  0  0  0  0  0  0  0  0  0
   -0.2024    3.8147    0.0000 C   0  0  0  0  0  0  0  0  0  0  0  0
   -1.1160    4.2215    0.0000 N   0  0  0  0  0  0  0  0  0  0  0  0
   -1.9820    3.7215    0.0000 C   0  0  0  0  0  0  0  0  0  0  0  0
   -2.7251    4.3906    0.0000 N   0  0  0  0  0  0  0  0  0  0  0  0
   -2.3184    5.3041    0.0000 C   0  0  0  0  0  0  0  0  0  0  0  0
   -2.7251    6.2177    0.0000 C   0  0  0  0  0  0  0  0  0  0  0  0
   -3.7197    6.3222    0.0000 N   0  0  0  0  0  0  0  0  0  0  0  0
   -2.1374    7.0267    0.0000 N   0  0  0  0  0  0  0  0  0  0  0  0
   -1.1428    6.9222    0.0000 C   0  0  0  0  0  0  0  0  0  0  0  0
   -0.7361    6.0086    0.0000 N   0  0  0  0  0  0  0  0  0  0  0  0
   -1.3239    5.1996    0.0000 C   0  0  0  0  0  0  0  0  0  0  0  0
    0.6636    4.3147    0.0000 C   0  0  0  0  0  0  0  0  0  0  0  0
    0.7681    5.3092    0.0000 O   0  0  0  0  0  0  0  0  0  0  0  0
    1.4067    3.6456    0.0000 C   0  0  0  0  0  0  0  0  0  0  0  0
    2.3849    3.8535    0.0000 O   0  0  0  0  0  0  0  0  0  0  0  0
   -3.0878    0.6750    0.0000 C   0  0  0  0  0  0  0  0  0  0  0  0
   -2.7788    1.6261    0.0000 O   0  0  0  0  0  0  0  0  0  0  0  0
   -4.0388    0.3660    0.0000 C   0  0  0  0  0  0  0  0  0  0  0  0
   -4.8479    0.9538    0.0000 O   0  0  0  0  0  0  0  0  0  0  0  0
   -5.7614   -0.8150    0.0000 C   0  0  0  0  0  0  0  0  0  0  0  0
  1  2  1  0
  2  3  2  0
  2  4  1  0
  4  5  2  0
  5  6  1  0
  6  7  2  0
  7  8  1  0
  8  9  1  0
  8 44  2  0
  9 10  1  0
 10 11  1  0
 11 12  1  0
 11 40  1  0
 12 13  1  0
 13 14  1  0
 14 15  2  0
 14 16  1  0
 14 17  1  0
 17 18  1  0
 18 19  2  0
 18 20  1  0
 18 21  1  0
 21 22  1  0
 22 23  1  0
 23 24  1  0
 24 25  1  0
 25 26  1  0
 25 36  1  0
 26 27  1  0
 27 28  2  0
 28 29  1  0
 29 30  2  0
 30 31  1  0
 30 32  1  0
 32 33  2  0
 33 34  1  0
 34 35  2  0
 35 26  1  0
 35 29  1  0
 36 37  1  0
 36 38  1  0
 38 39  1  0
 38 23  1  0
 40 41  1  0
 40 42  1  0
 42 43  1  0
 42  9  1  0
 44  4  1  0
M  CHG  2   8   1  16  -1
M  END
>  <group_A>  (116) 
1

>  <group_B>  (116) 
1

>  <group_C>  (116) 
1

>  <group_D>  (116) 
1

>  <group_G>  (116) 
1

>  <group_H>  (116) 
0

>  <group_J>  (116) 
0

>  <group_L>  (116) 
0

>  <group_M>  (116) 
1

>  <group_N>  (116) 
0

>  <group_P>  (116) 
0

>  <group_R>  (116) 
0

>  <group_S>  (116) 
1

>  <group_V>  (116) 
1

$$$$

     RDKit          2D

 44 48  0  0  0  0  0  0  0  0999 V2000
    4.2053   -4.5343    0.0000 N   0  0  0  0  0  0  0  0  0  0  0  0
    3.7986   -5.4478    0.0000 C   0  0  0  0  0  0  0  0  0  0  0  0
    4.3864   -6.2568    0.0000 O   0  0  0  0  0  0  0  0  0  0  0  0
    2.8041   -5.5523    0.0000 C   0  0  0  0  0  0  0  0  0  0  0  0
    2.2163   -4.7433    0.0000 C   0  0  0  0  0  0  0  0  0  0  0  0
    1.2218   -4.8479    0.0000 N   0  0  0  0  0  0  0  0  0  0  0  0
    0.6340   -4.0388    0.0000 C   0  0  0  0  0  0  0  0  0  0  0  0
    0.9430   -3.0878    0.0000 O   0  0  0  0  0  0  0  0  0  0  0  0
    0.1340   -2.5000    0.0000 C   0  0  0  0  0  0  0  0  0  0  0  0
    0.1340   -1.5000    0.0000 C   0  0  0  0  0  0  0  0  0  0  0  0
    1.0000   -1.0000    0.0000 O   0  0  0  0  0  0  0  0  0  0  0  0
    1.0000   -0.0000    0.0000 P   0  0  0  0  0  0  0  0  0  0  0  0
    2.0000   -0.0000    0.0000 O   0  0  0  0  0  0  0  0  0  0  0  0
    1.0000    1.0000    0.0000 O   0  0  0  0  0  0  0  0  0  0  0  0
    0.0000   -0.0000    0.0000 O   0  0  0  0  0  0  0  0  0  0  0  0
   -1.0000   -0.0000    0.0000 P   0  0  0  0  0  0  0  0  0  0  0  0
   -1.0000   -1.0000    0.0000 O   0  0  0  0  0  0  0  0  0  0  0  0
   -2.0000   -0.0000    0.0000 O   0  0  0  0  0  0  0  0  0  0  0  0
   -1.0000    1.0000    0.0000 O   0  0  0  0  0  0  0  0  0  0  0  0
   -1.8660    1.5000    0.0000 C   0  0  0  0  0  0  0  0  0  0  0  0
   -2.7321    1.0000    0.0000 C   0  0  0  0  0  0  0  0  0  0  0  0
   -2.8366    0.0055    0.0000 O   0  0  0  0  0  0  0  0  0  0  0  0
   -3.8147   -0.2024    0.0000 C   0  0  0  0  0  0  0  0  0  0  0  0
   -4.2215   -1.1160    0.0000 N   0  0  0  0  0  0  0  0  0  0  0  0
   -3.7215   -1.9820    0.0000 C   0  0  0  0  0  0  0  0  0  0  0  0
   -4.3906   -2.7251    0.0000 N   0  0  0  0  0  0  0  0  0  0  0  0
   -5.3041   -2.3184    0.0000 C   0  0  0  0  0  0  0  0  0  0  0  0
   -6.2177   -2.7251    0.0000 C   0  0  0  0  0  0  0  0  0  0  0  0
   -6.3222   -3.7197    0.0000 N   0  0  0  0  0  0  0  0  0  0  0  0
   -7.0267   -2.1374    0.0000 N   0  0  0  0  0  0  0  0  0  0  0  0
   -6.9222   -1.1428    0.0000 C   0  0  0  0  0  0  0  0  0  0  0  0
   -6.0086   -0.7361    0.0000 N   0  0  0  0  0  0  0  0  0  0  0  0
   -5.1996   -1.3239    0.0000 C   0  0  0  0  0  0  0  0  0  0  0  0
   -4.3147    0.6636    0.0000 C   0  0  0  0  0  0  0  0  0  0  0  0
   -5.3092    0.7681    0.0000 O   0  0  0  0  0  0  0  0  0  0  0  0
   -3.6456    1.4067    0.0000 C   0  0  0  0  0  0  0  0  0  0  0  0
   -3.8535    2.3849    0.0000 O   0  0  0  0  0  0  0  0  0  0  0  0
   -0.6750   -3.0878    0.0000 C   0  0  0  0  0  0  0  0  0  0  0  0
   -1.6261   -2.7788    0.0000 O   0  0  0  0  0  0  0  0  0  0  0  0
   -0.3660   -4.0388    0.0000 C   0  0  0  0  0  0  0  0  0  0  0  0
   -0.9538   -4.8479    0.0000 O   0  0  0  0  0  0  0  0  0  0  0  0
    0.8150   -5.7614    0.0000 C   0  0  0  0  0  0  0  0  0  0  0  0
    1.4028   -6.5704    0.0000 C   0  0  0  0  0  0  0  0  0  0  0  0
    2.3973   -6.4659    0.0000 C   0  0  0  0  0  0  0  0  0  0  0  0
  1  2  1  0
  2  3  2  0
  2  4  1  0
  4  5  2  0
  5  6  1  0
  6  7  1  0
  6 42  1  0
  7  8  1  0
  8  9  1  0
  9 10  1  0
  9 38  1  0
 10 11  1  0
 11 12  1  0
 12 13  2  0
 12 14  1  0
 12 15  1  0
 15 16  1  0
 16 17  2  0
 16 18  1  0
 16 19  1  0
 19 20  1  0
 20 21  1  0
 21 22  1  0
 22 23  1  0
 23 24  1  0
 23 34  1  0
 24 25  1  0
 25 26  2  0
 26 27  1  0
 27 28  2  0
 28 29  1  0
 28 30  1  0
 30 31  2  0
 31 32  1  0
 32 33  2  0
 33 24  1  0
 33 27  1  0
 34 35  1  0
 34 36  1  0
 36 37  1  0
 36 21  1  0
 38 39  1  0
 38 40  1  0
 40 41  1  0
 40  7  1  0
 42 43  2  0
 43 44  1  0
 44  4  1  0
M  END
>  <group_A>  (117) 
1

>  <group_B>  (117) 
0

>  <group_C>  (117) 
0

>  <group_D>  (117) 
0

>  <group_G>  (117) 
1

>  <group_H>  (117) 
0

>  <group_J>  (117) 
0

>  <group_L>  (117) 
0

>  <group_M>  (117) 
1

>  <group_N>  (117) 
0

>  <group_P>  (117) 
0

>  <group_R>  (117) 
0

>  <group_S>  (117) 
1

>  <group_V>  (117) 
1

$$$$

     RDKit          2D

 37 39  0  0  0  0  0  0  0  0999 V2000
   -4.5000   -1.8660    0.0000 O   0  0  0  0  0  0  0  0  0  0  0  0
   -4.0000   -2.7321    0.0000 C   0  0  0  0  0  0  0  0  0  0  0  0
   -4.5000   -3.5981    0.0000 O   0  0  0  0  0  0  0  0  0  0  0  0
   -3.0000   -2.7321    0.0000 C   0  0  0  0  0  0  0  0  0  0  0  0
   -2.5000   -1.8660    0.0000 O   0  0  0  0  0  0  0  0  0  0  0  0
   -1.5000   -1.8660    0.0000 C   0  0  0  0  0  0  0  0  0  0  0  0
   -1.0000   -1.0000    0.0000 O   0  0  0  0  0  0  0  0  0  0  0  0
   -0.0000   -1.0000    0.0000 P   0  0  0  0  0  0  0  0  0  0  0  0
   -0.0000   -2.0000    0.0000 O   0  0  0  0  0  0  0  0  0  0  0  0
    1.0000   -1.0000    0.0000 O   0  0  0  0  0  0  0  0  0  0  0  0
   -0.0000   -0.0000    0.0000 O   0  0  0  0  0  0  0  0  0  0  0  0
    0.0000    1.0000    0.0000 P   0  0  0  0  0  0  0  0  0  0  0  0
   -1.0000    1.0000    0.0000 O   0  0  0  0  0  0  0  0  0  0  0  0
    0.0000    2.0000    0.0000 O   0  0  0  0  0  0  0  0  0  0  0  0
    1.0000    1.0000    0.0000 O   0  0  0  0  0  0  0  0  0  0  0  0
    1.5000    0.1340    0.0000 C   0  0  0  0  0  0  0  0  0  0  0  0
    2.5000    0.1340    0.0000 C   0  0  0  0  0  0  0  0  0  0  0  0
    3.0878   -0.6750    0.0000 O   0  0  0  0  0  0  0  0  0  0  0  0
    4.0388   -0.3660    0.0000 C   0  0  0  0  0  0  0  0  0  0  0  0
    4.8479   -0.9538    0.0000 N   0  0  0  0  0  0  0  0  0  0  0  0
    4.7433   -1.9483    0.0000 C   0  0  0  0  0  0  0  0  0  0  0  0
    5.5523   -2.5361    0.0000 C   0  0  0  0  0  0  0  0  0  0  0  0
    6.4659   -2.1294    0.0000 C   0  0  0  0  0  0  0  0  0  0  0  0
    7.2749   -2.7172    0.0000 O   0  0  0  0  0  0  0  0  0  0  0  0
    6.5704   -1.1349    0.0000 N   0  0  0  0  0  0  0  0  0  0  0  0
    5.7614   -0.5471    0.0000 C   0  0  0  0  0  0  0  0  0  0  0  0
    5.8659    0.4474    0.0000 O   0  0  0  0  0  0  0  0  0  0  0  0
    4.0388    0.6340    0.0000 C   0  0  0  0  0  0  0  0  0  0  0  0
    4.8479    1.2218    0.0000 O   0  0  0  0  0  0  0  0  0  0  0  0
    3.0878    0.9430    0.0000 C   0  0  0  0  0  0  0  0  0  0  0  0
    2.7788    1.8940    0.0000 O   0  0  0  0  0  0  0  0  0  0  0  0
   -1.0000   -2.7321    0.0000 C   0  0  0  0  0  0  0  0  0  0  0  0
   -0.0000   -2.7321    0.0000 O   0  0  0  0  0  0  0  0  0  0  0  0
   -1.5000   -3.5981    0.0000 C   0  0  0  0  0  0  0  0  0  0  0  0
   -1.0000   -4.4641    0.0000 O   0  0  0  0  0  0  0  0  0  0  0  0
   -2.5000   -3.5981    0.0000 C   0  0  0  0  0  0  0  0  0  0  0  0
   -3.0000   -4.4641    0.0000 O   0  0  0  0  0  0  0  0  0  0  0  0
  1  2  2  0
  2  3  1  0
  2  4  1  0
  4  5  1  0
  5  6  1  0
  6  7  1  0
  6 32  1  0
  7  8  1  0
  8  9  2  0
  8 10  1  0
  8 11  1  0
 11 12  1  0
 12 13  2  0
 12 14  1  0
 12 15  1  0
 15 16  1  0
 16 17  1  0
 17 18  1  0
 18 19  1  0
 19 20  1  0
 19 28  1  0
 20 21  1  0
 21 22  2  0
 22 23  1  0
 23 24  2  0
 23 25  1  0
 25 26  1  0
 26 27  2  0
 26 20  1  0
 28 29  1  0
 28 30  1  0
 30 31  1  0
 30 17  1  0
 32 33  1  0
 32 34  1  0
 34 35  1  0
 34 36  1  0
 36 37  1  0
 36  4  1  0
M  END
>  <group_A>  (118) 
1

>  <group_B>  (118) 
0

>  <group_C>  (118) 
0

>  <group_D>  (118) 
0

>  <group_G>  (118) 
0

>  <group_H>  (118) 
0

>  <group_J>  (118) 
0

>  <group_L>  (118) 
0

>  <group_M>  (118) 
0

>  <group_N>  (118) 
0

>  <group_P>  (118) 
0

>  <group_R>  (118) 
0

>  <group_S>  (118) 
0

>  <group_V>  (118) 
0

$$$$

     RDKit          2D

 23 24  0  0  0  0  0  0  0  0999 V2000
   -1.7321    3.0000    0.0000 O   0  0  0  0  0  0  0  0  0  0  0  0
   -2.5981    2.5000    0.0000 C   0  0  0  0  0  0  0  0  0  0  0  0
   -2.5981    1.5000    0.0000 C   0  0  0  0  0  0  0  0  0  0  0  0
   -1.7321    1.0000    0.0000 O   0  0  0  0  0  0  0  0  0  0  0  0
   -1.7321   -0.0000    0.0000 C   0  0  0  0  0  0  0  0  0  0  0  0
   -0.8660   -0.5000    0.0000 O   0  0  0  0  0  0  0  0  0  0  0  0
    0.0000   -0.0000    0.0000 C   0  0  0  0  0  0  0  0  0  0  0  0
    0.8660   -0.5000    0.0000 C   0  0  0  0  0  0  0  0  0  0  0  0
    0.8660   -1.5000    0.0000 C   0  0  0  0  0  0  0  0  0  0  0  0
    1.7321   -2.0000    0.0000 O   0  0  0  0  0  0  0  0  0  0  0  0
    1.7321    0.0000    0.0000 O   0  0  0  0  0  0  0  0  0  0  0  0
    1.7321    1.0000    0.0000 C   0  0  0  0  0  0  0  0  0  0  0  0
    2.5981    1.5000    0.0000 O   0  0  0  0  0  0  0  0  0  0  0  0
    0.8660    1.5000    0.0000 C   0  0  0  0  0  0  0  0  0  0  0  0
    0.8660    2.5000    0.0000 O   0  0  0  0  0  0  0  0  0  0  0  0
    0.0000    1.0000    0.0000 C   0  0  0  0  0  0  0  0  0  0  0  0
   -0.8660    1.5000    0.0000 O   0  0  0  0  0  0  0  0  0  0  0  0
   -2.5981   -0.5000    0.0000 C   0  0  0  0  0  0  0  0  0  0  0  0
   -2.5981   -1.5000    0.0000 O   0  0  0  0  0  0  0  0  0  0  0  0
   -3.4641   -0.0000    0.0000 C   0  0  0  0  0  0  0  0  0  0  0  0
   -4.3301   -0.5000    0.0000 O   0  0  0  0  0  0  0  0  0  0  0  0
   -3.4641    1.0000    0.0000 C   0  0  0  0  0  0  0  0  0  0  0  0
   -4.3301    1.5000    0.0000 O   0  0  0  0  0  0  0  0  0  0  0  0
  1  2  1  0
  2  3  1  0
  3  4  1  0
  4  5  1  0
  5  6  1  0
  5 18  1  0
  6  7  1  0
  7  8  1  0
  8  9  1  0
  8 11  1  0
  9 10  1  0
 11 12  1  0
 12 13  1  0
 12 14  1  0
 14 15  1  0
 14 16  1  0
 16 17  1  0
 16  7  1  0
 18 19  1  0
 18 20  1  0
 20 21  1  0
 20 22  1  0
 22 23  1  0
 22  3  1  0
M  END
>  <group_A>  (119) 
1

>  <group_B>  (119) 
1

>  <group_C>  (119) 
1

>  <group_D>  (119) 
0

>  <group_G>  (119) 
1

>  <group_H>  (119) 
0

>  <group_J>  (119) 
0

>  <group_L>  (119) 
0

>  <group_M>  (119) 
0

>  <group_N>  (119) 
0

>  <group_P>  (119) 
0

>  <group_R>  (119) 
0

>  <group_S>  (119) 
1

>  <group_V>  (119) 
1

$$$$

     RDKit          2D

  5  4  0  0  0  0  0  0  0  0999 V2000
    1.0000   -1.0000    0.0000 C   0  0  0  0  0  0  0  0  0  0  0  0
    1.0000    0.0000    0.0000 As  0  0  0  0  0  5  0  0  0  0  0  0
    2.0000    0.0000    0.0000 C   0  0  0  0  0  0  0  0  0  0  0  0
    1.0000    1.0000    0.0000 O   0  0  0  0  0  0  0  0  0  0  0  0
    0.0000    0.0000    0.0000 O   0  0  0  0  0  0  0  0  0  0  0  0
  1  2  1  0
  2  3  1  0
  2  4  2  0
  2  5  1  0
M  CHG  1   5  -1
M  END
>  <group_A>  (120) 
1

>  <group_B>  (120) 
1

>  <group_C>  (120) 
1

>  <group_D>  (120) 
0

>  <group_G>  (120) 
1

>  <group_H>  (120) 
0

>  <group_J>  (120) 
0

>  <group_L>  (120) 
0

>  <group_M>  (120) 
1

>  <group_N>  (120) 
0

>  <group_P>  (120) 
0

>  <group_R>  (120) 
0

>  <group_S>  (120) 
1

>  <group_V>  (120) 
1

$$$$

     RDKit          2D

  9  9  0  0  0  0  0  0  0  0999 V2000
   -0.8660   -1.5000    0.0000 N   0  0  0  0  0  0  0  0  0  0  0  0
   -0.0000   -1.0000    0.0000 C   0  0  0  0  0  0  0  0  0  0  0  0
    0.8660   -1.5000    0.0000 O   0  0  0  0  0  0  0  0  0  0  0  0
    0.0000    0.0000    0.0000 C   0  0  0  0  0  0  0  0  0  0  0  0
   -0.8660    0.5000    0.0000 C   0  0  0  0  0  0  0  0  0  0  0  0
   -0.8660    1.5000    0.0000 C   0  0  0  0  0  0  0  0  0  0  0  0
    0.0000    2.0000    0.0000 C   0  0  0  0  0  0  0  0  0  0  0  0
    0.8660    1.5000    0.0000 N   0  0  0  0  0  0  0  0  0  0  0  0
    0.8660    0.5000    0.0000 C   0  0  0  0  0  0  0  0  0  0  0  0
  1  2  1  0
  2  3  2  0
  2  4  1  0
  4  5  2  0
  5  6  1  0
  6  7  2  0
  7  8  1  0
  8  9  2  0
  9  4  1  0
M  END
>  <group_A>  (121) 
1

>  <group_B>  (121) 
0

>  <group_C>  (121) 
0

>  <group_D>  (121) 
0

>  <group_G>  (121) 
1

>  <group_H>  (121) 
0

>  <group_J>  (121) 
0

>  <group_L>  (121) 
0

>  <group_M>  (121) 
0

>  <group_N>  (121) 
0

>  <group_P>  (121) 
0

>  <group_R>  (121) 
0

>  <group_S>  (121) 
1

>  <group_V>  (121) 
0

$$$$

     RDKit          2D

  8  7  0  0  0  0  0  0  0  0999 V2000
    1.7321   -1.0000    0.0000 N   0  0  0  0  0  0  0  0  0  0  0  0
    1.7321   -0.0000    0.0000 C   0  0  0  0  0  0  0  0  0  0  0  0
    2.5981    0.5000    0.0000 C   0  0  0  0  0  0  0  0  0  0  0  0
    2.5981    1.5000    0.0000 S   0  0  0  0  0  0  0  0  0  0  0  0
    3.4641    2.0000    0.0000 S   0  0  0  0  0  0  0  0  0  0  0  0
    0.8660    0.5000    0.0000 C   0  0  0  0  0  0  0  0  0  0  0  0
    0.8660    1.5000    0.0000 O   0  0  0  0  0  0  0  0  0  0  0  0
    0.0000    0.0000    0.0000 O   0  0  0  0  0  0  0  0  0  0  0  0
  1  2  1  0
  2  3  1  0
  2  6  1  0
  3  4  1  0
  4  5  1  0
  6  7  2  0
  6  8  1  0
M  END
>  <group_A>  (122) 
1

>  <group_B>  (122) 
1

>  <group_C>  (122) 
0

>  <group_D>  (122) 
0

>  <group_G>  (122) 
1

>  <group_H>  (122) 
0

>  <group_J>  (122) 
0

>  <group_L>  (122) 
0

>  <group_M>  (122) 
0

>  <group_N>  (122) 
0

>  <group_P>  (122) 
0

>  <group_R>  (122) 
0

>  <group_S>  (122) 
1

>  <group_V>  (122) 
0

$$$$

     RDKit          2D

 10  9  0  0  0  0  0  0  0  0999 V2000
    3.4641    0.0000    0.0000 O   0  0  0  0  0  0  0  0  0  0  0  0
    3.4641    1.0000    0.0000 C   0  0  0  0  0  0  0  0  0  0  0  0
    4.3301    1.5000    0.0000 O   0  0  0  0  0  0  0  0  0  0  0  0
    2.5981    1.5000    0.0000 C   0  0  0  0  0  0  0  0  0  0  0  0
    1.7321    1.0000    0.0000 C   0  0  0  0  0  0  0  0  0  0  0  0
    0.8660    1.5000    0.0000 C   0  0  0  0  0  0  0  0  0  0  0  0
    0.8660    2.5000    0.0000 O   0  0  0  0  0  0  0  0  0  0  0  0
   -0.0000    1.0000    0.0000 C   0  0  0  0  0  0  0  0  0  0  0  0
   -0.8660    1.5000    0.0000 O   0  0  0  0  0  0  0  0  0  0  0  0
   -0.0000   -0.0000    0.0000 O   0  0  0  0  0  0  0  0  0  0  0  0
  1  2  2  0
  2  3  1  0
  2  4  1  0
  4  5  1  0
  5  6  1  0
  6  7  2  0
  6  8  1  0
  8  9  2  0
  8 10  1  0
M  END
>  <group_A>  (123) 
1

>  <group_B>  (123) 
0

>  <group_C>  (123) 
0

>  <group_D>  (123) 
0

>  <group_G>  (123) 
1

>  <group_H>  (123) 
0

>  <group_J>  (123) 
0

>  <group_L>  (123) 
0

>  <group_M>  (123) 
0

>  <group_N>  (123) 
0

>  <group_P>  (123) 
0

>  <group_R>  (123) 
0

>  <group_S>  (123) 
1

>  <group_V>  (123) 
0

$$$$

     RDKit          2D

  1  0  0  0  0  0  0  0  0  0999 V2000
    1.0000    0.0000    0.0000 Fe  0  0  0  0  0 15  0  0  0  0  0  0
M  CHG  1   1   2
M  END
>  <group_A>  (124) 
1

>  <group_B>  (124) 
1

>  <group_C>  (124) 
0

>  <group_D>  (124) 
1

>  <group_G>  (124) 
1

>  <group_H>  (124) 
0

>  <group_J>  (124) 
1

>  <group_L>  (124) 
0

>  <group_M>  (124) 
1

>  <group_N>  (124) 
0

>  <group_P>  (124) 
0

>  <group_R>  (124) 
0

>  <group_S>  (124) 
1

>  <group_V>  (124) 
1

$$$$

     RDKit          2D

 13 12  0  0  0  0  0  0  0  0999 V2000
    5.1962   -0.0000    0.0000 N   0  0  0  0  0  0  0  0  0  0  0  0
    5.1962    1.0000    0.0000 C   0  0  0  0  0  0  0  0  0  0  0  0
    6.0622    1.5000    0.0000 N   0  0  0  0  0  0  0  0  0  0  0  0
    6.0622    2.5000    0.0000 O   0  0  0  0  0  0  0  0  0  0  0  0
    4.3301    1.5000    0.0000 N   0  0  0  0  0  0  0  0  0  0  0  0
    3.4641    1.0000    0.0000 C   0  0  0  0  0  0  0  0  0  0  0  0
    2.5981    1.5000    0.0000 C   0  0  0  0  0  0  0  0  0  0  0  0
    1.7321    1.0000    0.0000 C   0  0  0  0  0  0  0  0  0  0  0  0
    0.8660    1.5000    0.0000 C   0  0  0  0  0  0  0  0  0  0  0  0
    0.8660    2.5000    0.0000 N   0  0  0  0  0  0  0  0  0  0  0  0
    0.0000    1.0000    0.0000 C   0  0  0  0  0  0  0  0  0  0  0  0
   -0.8660    1.5000    0.0000 O   0  0  0  0  0  0  0  0  0  0  0  0
    0.0000    0.0000    0.0000 O   0  0  0  0  0  0  0  0  0  0  0  0
  1  2  2  0
  2  3  1  0
  2  5  1  0
  3  4  1  0
  5  6  1  0
  6  7  1  0
  7  8  1  0
  8  9  1  0
  9 10  1  0
  9 11  1  0
 11 12  2  0
 11 13  1  0
M  END
>  <group_A>  (125) 
1

>  <group_B>  (125) 
0

>  <group_C>  (125) 
0

>  <group_D>  (125) 
0

>  <group_G>  (125) 
1

>  <group_H>  (125) 
0

>  <group_J>  (125) 
0

>  <group_L>  (125) 
0

>  <group_M>  (125) 
0

>  <group_N>  (125) 
0

>  <group_P>  (125) 
0

>  <group_R>  (125) 
0

>  <group_S>  (125) 
1

>  <group_V>  (125) 
0

$$$$

     RDKit          2D

  2  1  0  0  0  0  0  0  0  0999 V2000
    1.0000   -0.0000    0.0000 C   0  0  0  0  0  0  0  0  0  0  0  0
   -0.0000   -0.0000    0.0000 O   0  0  0  0  0  0  0  0  0  0  0  0
  1  2  3  0
M  CHG  2   1  -1   2   1
M  END
>  <group_A>  (126) 
1

>  <group_B>  (126) 
1

>  <group_C>  (126) 
1

>  <group_D>  (126) 
0

>  <group_G>  (126) 
1

>  <group_H>  (126) 
0

>  <group_J>  (126) 
0

>  <group_L>  (126) 
0

>  <group_M>  (126) 
0

>  <group_N>  (126) 
0

>  <group_P>  (126) 
0

>  <group_R>  (126) 
0

>  <group_S>  (126) 
1

>  <group_V>  (126) 
1

$$$$

     RDKit          2D

  1  0  0  0  0  0  0  0  0  0999 V2000
    1.0000    0.0000    0.0000 Fe  0  0  0  0  0 15  0  0  0  0  0  0
M  CHG  1   1   3
M  END
>  <group_A>  (127) 
1

>  <group_B>  (127) 
1

>  <group_C>  (127) 
1

>  <group_D>  (127) 
1

>  <group_G>  (127) 
1

>  <group_H>  (127) 
0

>  <group_J>  (127) 
0

>  <group_L>  (127) 
1

>  <group_M>  (127) 
1

>  <group_N>  (127) 
1

>  <group_P>  (127) 
0

>  <group_R>  (127) 
1

>  <group_S>  (127) 
1

>  <group_V>  (127) 
1

$$$$

     RDKit          2D

 12 12  0  0  0  0  0  0  0  0999 V2000
   -0.8660   -1.5000    0.0000 O   0  0  0  0  0  0  0  0  0  0  0  0
    0.0000   -1.0000    0.0000 C   0  0  0  0  0  0  0  0  0  0  0  0
    0.0000    0.0000    0.0000 C   0  0  0  0  0  0  0  0  0  0  0  0
   -0.8660    0.5000    0.0000 O   0  0  0  0  0  0  0  0  0  0  0  0
   -0.8660    1.5000    0.0000 C   0  0  0  0  0  0  0  0  0  0  0  0
   -1.7321    2.0000    0.0000 O   0  0  0  0  0  0  0  0  0  0  0  0
   -0.0000    2.0000    0.0000 C   0  0  0  0  0  0  0  0  0  0  0  0
    0.0000    3.0000    0.0000 O   0  0  0  0  0  0  0  0  0  0  0  0
    0.8660    1.5000    0.0000 C   0  0  0  0  0  0  0  0  0  0  0  0
    1.7321    2.0000    0.0000 O   0  0  0  0  0  0  0  0  0  0  0  0
    0.8660    0.5000    0.0000 C   0  0  0  0  0  0  0  0  0  0  0  0
    1.7321    0.0000    0.0000 O   0  0  0  0  0  0  0  0  0  0  0  0
  1  2  1  0
  2  3  1  0
  3  4  1  0
  4  5  1  0
  5  6  1  0
  5  7  1  0
  7  8  1  0
  7  9  1  0
  9 10  1  0
  9 11  1  0
 11 12  1  0
 11  3  1  0
M  END
>  <group_A>  (128) 
0

>  <group_B>  (128) 
1

>  <group_C>  (128) 
1

>  <group_D>  (128) 
0

>  <group_G>  (128) 
0

>  <group_H>  (128) 
0

>  <group_J>  (128) 
0

>  <group_L>  (128) 
0

>  <group_M>  (128) 
0

>  <group_N>  (128) 
0

>  <group_P>  (128) 
0

>  <group_R>  (128) 
0

>  <group_S>  (128) 
0

>  <group_V>  (128) 
1

$$$$

     RDKit          2D

 10  9  0  0  0  0  0  0  0  0999 V2000
    1.7321   -1.0000    0.0000 N   0  0  0  0  0  0  0  0  0  0  0  0
    1.7321    0.0000    0.0000 C   0  0  0  0  0  0  0  0  0  0  0  0
    2.5981    0.5000    0.0000 C   0  0  0  0  0  0  0  0  0  0  0  0
    2.5981    1.5000    0.0000 C   0  0  0  0  0  0  0  0  0  0  0  0
    3.4641    2.0000    0.0000 C   0  0  0  0  0  0  0  0  0  0  0  0
    4.3301    1.5000    0.0000 C   0  0  0  0  0  0  0  0  0  0  0  0
    5.1962    2.0000    0.0000 N   0  0  0  0  0  0  0  0  0  0  0  0
    0.8660    0.5000    0.0000 C   0  0  0  0  0  0  0  0  0  0  0  0
    0.8660    1.5000    0.0000 O   0  0  0  0  0  0  0  0  0  0  0  0
    0.0000    0.0000    0.0000 O   0  0  0  0  0  0  0  0  0  0  0  0
  1  2  1  0
  2  3  1  0
  2  8  1  0
  3  4  1  0
  4  5  1  0
  5  6  1  0
  6  7  1  0
  8  9  2  0
  8 10  1  0
M  CHG  1   7   1
M  END
>  <group_A>  (129) 
1

>  <group_B>  (129) 
1

>  <group_C>  (129) 
1

>  <group_D>  (129) 
0

>  <group_G>  (129) 
1

>  <group_H>  (129) 
0

>  <group_J>  (129) 
0

>  <group_L>  (129) 
0

>  <group_M>  (129) 
1

>  <group_N>  (129) 
0

>  <group_P>  (129) 
0

>  <group_R>  (129) 
0

>  <group_S>  (129) 
1

>  <group_V>  (129) 
1

$$$$

     RDKit          2D

  9  8  0  0  0  0  0  0  0  0999 V2000
    1.0000   -1.0000    0.0000 O   0  0  0  0  0  0  0  0  0  0  0  0
    1.0000    0.0000    0.0000 P   0  0  0  0  0  0  0  0  0  0  0  0
    2.0000    0.0000    0.0000 O   0  0  0  0  0  0  0  0  0  0  0  0
    1.0000    1.0000    0.0000 O   0  0  0  0  0  0  0  0  0  0  0  0
    0.0000    0.0000    0.0000 O   0  0  0  0  0  0  0  0  0  0  0  0
   -1.0000   -0.0000    0.0000 P   0  0  0  0  0  0  0  0  0  0  0  0
   -1.0000    1.0000    0.0000 O   0  0  0  0  0  0  0  0  0  0  0  0
   -2.0000   -0.0000    0.0000 O   0  0  0  0  0  0  0  0  0  0  0  0
   -1.0000   -1.0000    0.0000 O   0  0  0  0  0  0  0  0  0  0  0  0
  1  2  2  0
  2  3  1  0
  2  4  1  0
  2  5  1  0
  5  6  1  0
  6  7  2  0
  6  8  1  0
  6  9  1  0
M  CHG  2   3  -1   8  -1
M  END
>  <group_A>  (130) 
1

>  <group_B>  (130) 
0

>  <group_C>  (130) 
0

>  <group_D>  (130) 
0

>  <group_G>  (130) 
1

>  <group_H>  (130) 
0

>  <group_J>  (130) 
0

>  <group_L>  (130) 
0

>  <group_M>  (130) 
1

>  <group_N>  (130) 
0

>  <group_P>  (130) 
0

>  <group_R>  (130) 
0

>  <group_S>  (130) 
1

>  <group_V>  (130) 
0

$$$$

     RDKit          2D

  4  3  0  0  0  0  0  0  0  0999 V2000
    1.7321   -0.0000    0.0000 O   0  0  0  0  0  0  0  0  0  0  0  0
    0.8660    0.5000    0.0000 P   0  0  0  0  0  0  0  0  0  0  0  0
    0.8660    1.5000    0.0000 O   0  0  0  0  0  0  0  0  0  0  0  0
   -0.0000   -0.0000    0.0000 O   0  0  0  0  0  0  0  0  0  0  0  0
  1  2  2  0
  2  3  1  0
  2  4  1  0
M  CHG  3   2  -1   3  -1   4  -1
M  END
>  <group_A>  (131) 
1

>  <group_B>  (131) 
1

>  <group_C>  (131) 
1

>  <group_D>  (131) 
0

>  <group_G>  (131) 
0

>  <group_H>  (131) 
0

>  <group_J>  (131) 
0

>  <group_L>  (131) 
0

>  <group_M>  (131) 
0

>  <group_N>  (131) 
0

>  <group_P>  (131) 
0

>  <group_R>  (131) 
0

>  <group_S>  (131) 
0

>  <group_V>  (131) 
1

$$$$

     RDKit          2D

 31 33  0  0  0  0  0  0  0  0999 V2000
    7.9690    0.4262    0.0000 N   0  0  0  0  0  0  0  0  0  0  0  0
    7.3812   -0.3828    0.0000 C   0  0  0  0  0  0  0  0  0  0  0  0
    7.7880   -1.2963    0.0000 N   0  0  0  0  0  0  0  0  0  0  0  0
    7.2002   -2.1053    0.0000 C   0  0  0  0  0  0  0  0  0  0  0  0
    6.2057   -2.0008    0.0000 N   0  0  0  0  0  0  0  0  0  0  0  0
    5.7989   -1.0873    0.0000 C   0  0  0  0  0  0  0  0  0  0  0  0
    6.3867   -0.2782    0.0000 C   0  0  0  0  0  0  0  0  0  0  0  0
    5.7989    0.5308    0.0000 N   0  0  0  0  0  0  0  0  0  0  0  0
    4.8479    0.2218    0.0000 C   0  0  0  0  0  0  0  0  0  0  0  0
    4.8479   -0.7782    0.0000 N   0  0  0  0  0  0  0  0  0  0  0  0
    4.0388   -1.3660    0.0000 C   0  0  0  0  0  0  0  0  0  0  0  0
    3.0878   -1.0570    0.0000 O   0  0  0  0  0  0  0  0  0  0  0  0
    2.5000   -1.8660    0.0000 C   0  0  0  0  0  0  0  0  0  0  0  0
    1.5000   -1.8660    0.0000 C   0  0  0  0  0  0  0  0  0  0  0  0
    1.0000   -1.0000    0.0000 O   0  0  0  0  0  0  0  0  0  0  0  0
   -0.0000   -1.0000    0.0000 P   0  0  0  0  0  0  0  0  0  0  0  0
   -0.0000   -2.0000    0.0000 O   0  0  0  0  0  0  0  0  0  0  0  0
   -1.0000   -1.0000    0.0000 O   0  0  0  0  0  0  0  0  0  0  0  0
    0.0000   -0.0000    0.0000 O   0  0  0  0  0  0  0  0  0  0  0  0
    0.0000    1.0000    0.0000 P   0  0  0  0  0  0  0  0  0  0  0  0
   -1.0000    1.0000    0.0000 O   0  0  0  0  0  0  0  0  0  0  0  0
    0.0000    2.0000    0.0000 O   0  0  0  0  0  0  0  0  0  0  0  0
    1.0000    1.0000    0.0000 C   0  0  0  0  0  0  0  0  0  0  0  0
    1.5000    0.1340    0.0000 P   0  0  0  0  0  0  0  0  0  0  0  0
    2.3660    0.6340    0.0000 O   0  0  0  0  0  0  0  0  0  0  0  0
    2.0000   -0.7321    0.0000 O   0  0  0  0  0  0  0  0  0  0  0  0
    0.6340   -0.3660    0.0000 O   0  0  0  0  0  0  0  0  0  0  0  0
    3.0878   -2.6750    0.0000 C   0  0  0  0  0  0  0  0  0  0  0  0
    2.7788   -3.6261    0.0000 O   0  0  0  0  0  0  0  0  0  0  0  0
    4.0388   -2.3660    0.0000 C   0  0  0  0  0  0  0  0  0  0  0  0
    4.8479   -2.9538    0.0000 O   0  0  0  0  0  0  0  0  0  0  0  0
  1  2  1  0
  2  3  2  0
  3  4  1  0
  4  5  2  0
  5  6  1  0
  6  7  2  0
  7  8  1  0
  7  2  1  0
  8  9  2  0
  9 10  1  0
 10 11  1  0
 10  6  1  0
 11 12  1  0
 12 13  1  0
 13 14  1  0
 13 28  1  0
 14 15  1  0
 15 16  1  0
 16 17  2  0
 16 18  1  0
 16 19  1  0
 19 20  1  0
 20 21  2  0
 20 22  1  0
 20 23  1  0
 23 24  1  0
 24 25  2  0
 24 26  1  0
 24 27  1  0
 28 29  1  0
 28 30  1  0
 30 31  1  0
 30 11  1  0
M  END
>  <group_A>  (132) 
1

>  <group_B>  (132) 
1

>  <group_C>  (132) 
0

>  <group_D>  (132) 
0

>  <group_G>  (132) 
1

>  <group_H>  (132) 
0

>  <group_J>  (132) 
0

>  <group_L>  (132) 
1

>  <group_M>  (132) 
1

>  <group_N>  (132) 
0

>  <group_P>  (132) 
0

>  <group_R>  (132) 
0

>  <group_S>  (132) 
1

>  <group_V>  (132) 
0

$$$$

     RDKit          2D

 31 33  0  0  0  0  0  0  0  0999 V2000
    7.9690   -4.1583    0.0000 N   0  0  0  0  0  0  0  0  0  0  0  0
    7.3812   -3.3493    0.0000 C   0  0  0  0  0  0  0  0  0  0  0  0
    7.7880   -2.4357    0.0000 N   0  0  0  0  0  0  0  0  0  0  0  0
    7.2002   -1.6267    0.0000 C   0  0  0  0  0  0  0  0  0  0  0  0
    6.2057   -1.7312    0.0000 N   0  0  0  0  0  0  0  0  0  0  0  0
    5.7989   -2.6448    0.0000 C   0  0  0  0  0  0  0  0  0  0  0  0
    6.3867   -3.4538    0.0000 C   0  0  0  0  0  0  0  0  0  0  0  0
    5.7989   -4.2628    0.0000 N   0  0  0  0  0  0  0  0  0  0  0  0
    4.8479   -3.9538    0.0000 C   0  0  0  0  0  0  0  0  0  0  0  0
    4.8479   -2.9538    0.0000 N   0  0  0  0  0  0  0  0  0  0  0  0
    4.0388   -2.3660    0.0000 C   0  0  0  0  0  0  0  0  0  0  0  0
    3.0878   -2.6750    0.0000 O   0  0  0  0  0  0  0  0  0  0  0  0
    2.5000   -1.8660    0.0000 C   0  0  0  0  0  0  0  0  0  0  0  0
    1.5000   -1.8660    0.0000 C   0  0  0  0  0  0  0  0  0  0  0  0
    1.0000   -1.0000    0.0000 O   0  0  0  0  0  0  0  0  0  0  0  0
    0.0000   -1.0000    0.0000 P   0  0  0  0  0  0  0  0  0  0  0  0
   -0.0000   -2.0000    0.0000 O   0  0  0  0  0  0  0  0  0  0  0  0
   -1.0000   -1.0000    0.0000 O   0  0  0  0  0  0  0  0  0  0  0  0
    0.0000   -0.0000    0.0000 O   0  0  0  0  0  0  0  0  0  0  0  0
    0.0000    1.0000    0.0000 P   0  0  0  0  0  0  0  0  0  0  0  0
   -1.0000    1.0000    0.0000 O   0  0  0  0  0  0  0  0  0  0  0  0
    0.0000    2.0000    0.0000 O   0  0  0  0  0  0  0  0  0  0  0  0
    1.0000    1.0000    0.0000 O   0  0  0  0  0  0  0  0  0  0  0  0
    2.0000    1.0000    0.0000 P   0  0  0  0  0  0  0  0  0  0  0  0
    2.0000    2.0000    0.0000 O   0  0  0  0  0  0  0  0  0  0  0  0
    3.0000    1.0000    0.0000 O   0  0  0  0  0  0  0  0  0  0  0  0
    2.0000    0.0000    0.0000 O   0  0  0  0  0  0  0  0  0  0  0  0
    3.0878   -1.0570    0.0000 C   0  0  0  0  0  0  0  0  0  0  0  0
    2.7788   -0.1060    0.0000 O   0  0  0  0  0  0  0  0  0  0  0  0
    4.0388   -1.3660    0.0000 C   0  0  0  0  0  0  0  0  0  0  0  0
    4.8479   -0.7782    0.0000 O   0  0  0  0  0  0  0  0  0  0  0  0
  1  2  1  0
  2  3  2  0
  3  4  1  0
  4  5  2  0
  5  6  1  0
  6  7  2  0
  7  8  1  0
  7  2  1  0
  8  9  2  0
  9 10  1  0
 10 11  1  0
 10  6  1  0
 11 12  1  0
 12 13  1  0
 13 14  1  0
 13 28  1  0
 14 15  1  0
 15 16  1  0
 16 17  2  0
 16 18  1  0
 16 19  1  0
 19 20  1  0
 20 21  2  0
 20 22  1  0
 20 23  1  0
 23 24  1  0
 24 25  2  0
 24 26  1  0
 24 27  1  0
 28 29  1  0
 28 30  1  0
 30 31  1  0
 30 11  1  0
M  END
>  <group_A>  (133) 
1

>  <group_B>  (133) 
1

>  <group_C>  (133) 
1

>  <group_D>  (133) 
1

>  <group_G>  (133) 
1

>  <group_H>  (133) 
0

>  <group_J>  (133) 
1

>  <group_L>  (133) 
0

>  <group_M>  (133) 
1

>  <group_N>  (133) 
1

>  <group_P>  (133) 
0

>  <group_R>  (133) 
0

>  <group_S>  (133) 
1

>  <group_V>  (133) 
1

$$$$

     RDKit          2D

  2  1  0  0  0  0  0  0  0  0999 V2000
    1.0000   -0.0000    0.0000 C   0  0  0  0  0  0  0  0  0  0  0  0
   -0.0000   -0.0000    0.0000 N   0  0  0  0  0  0  0  0  0  0  0  0
  1  2  3  0
M  CHG  1   1  -1
M  END
>  <group_A>  (134) 
1

>  <group_B>  (134) 
1

>  <group_C>  (134) 
1

>  <group_D>  (134) 
0

>  <group_G>  (134) 
1

>  <group_H>  (134) 
0

>  <group_J>  (134) 
0

>  <group_L>  (134) 
0

>  <group_M>  (134) 
0

>  <group_N>  (134) 
1

>  <group_P>  (134) 
0

>  <group_R>  (134) 
0

>  <group_S>  (134) 
1

>  <group_V>  (134) 
1

$$$$

     RDKit          2D

  8  7  0  0  0  0  0  0  0  0999 V2000
    3.4641   -1.0000    0.0000 O   0  0  0  0  0  0  0  0  0  0  0  0
    3.4641    0.0000    0.0000 C   0  0  0  0  0  0  0  0  0  0  0  0
    4.3301    0.5000    0.0000 O   0  0  0  0  0  0  0  0  0  0  0  0
    2.5981    0.5000    0.0000 C   0  0  0  0  0  0  0  0  0  0  0  0
    1.7321    0.0000    0.0000 C   0  0  0  0  0  0  0  0  0  0  0  0
    0.8660    0.5000    0.0000 C   0  0  0  0  0  0  0  0  0  0  0  0
    0.8660    1.5000    0.0000 O   0  0  0  0  0  0  0  0  0  0  0  0
   -0.0000   -0.0000    0.0000 O   0  0  0  0  0  0  0  0  0  0  0  0
  1  2  2  0
  2  3  1  0
  2  4  1  0
  4  5  2  3
  5  6  1  0
  6  7  2  0
  6  8  1  0
M  END
>  <group_A>  (135) 
1

>  <group_B>  (135) 
0

>  <group_C>  (135) 
0

>  <group_D>  (135) 
0

>  <group_G>  (135) 
0

>  <group_H>  (135) 
0

>  <group_J>  (135) 
0

>  <group_L>  (135) 
0

>  <group_M>  (135) 
0

>  <group_N>  (135) 
0

>  <group_P>  (135) 
0

>  <group_R>  (135) 
0

>  <group_S>  (135) 
0

>  <group_V>  (135) 
0

$$$$

     RDKit          2D

  8  8  0  0  0  0  0  0  0  0999 V2000
   -0.0000   -1.0000    0.0000 O   0  0  0  0  0  0  0  0  0  0  0  0
    0.0000    0.0000    0.0000 C   0  0  0  0  0  0  0  0  0  0  0  0
   -0.8660    0.5000    0.0000 C   0  0  0  0  0  0  0  0  0  0  0  0
   -0.8660    1.5000    0.0000 S   0  0  0  0  0  0  0  0  0  0  0  0
    0.0000    2.0000    0.0000 S   0  0  0  0  0  0  0  0  0  0  0  0
    0.8660    1.5000    0.0000 C   0  0  0  0  0  0  0  0  0  0  0  0
    0.8660    0.5000    0.0000 C   0  0  0  0  0  0  0  0  0  0  0  0
    1.7321    0.0000    0.0000 O   0  0  0  0  0  0  0  0  0  0  0  0
  1  2  1  0
  2  3  1  0
  3  4  1  0
  4  5  1  0
  5  6  1  0
  6  7  1  0
  7  8  1  0
  7  2  1  0
M  END
>  <group_A>  (136) 
1

>  <group_B>  (136) 
0

>  <group_C>  (136) 
0

>  <group_D>  (136) 
0

>  <group_G>  (136) 
1

>  <group_H>  (136) 
0

>  <group_J>  (136) 
0

>  <group_L>  (136) 
0

>  <group_M>  (136) 
1

>  <group_N>  (136) 
0

>  <group_P>  (136) 
0

>  <group_R>  (136) 
0

>  <group_S>  (136) 
1

>  <group_V>  (136) 
0

$$$$

     RDKit          2D

  1  0  0  0  0  0  0  0  0  0999 V2000
    1.0000    0.0000    0.0000 Ni  0  0  0  0  0 15  0  0  0  0  0  0
M  CHG  1   1   2
M  END
>  <group_A>  (137) 
1

>  <group_B>  (137) 
1

>  <group_C>  (137) 
1

>  <group_D>  (137) 
1

>  <group_G>  (137) 
1

>  <group_H>  (137) 
0

>  <group_J>  (137) 
1

>  <group_L>  (137) 
1

>  <group_M>  (137) 
1

>  <group_N>  (137) 
1

>  <group_P>  (137) 
0

>  <group_R>  (137) 
0

>  <group_S>  (137) 
1

>  <group_V>  (137) 
1

$$$$

     RDKit          2D

 14 15  0  0  0  0  0  0  0  0999 V2000
    1.7321    3.0000    0.0000 O   0  0  0  0  0  0  0  0  0  0  0  0
    0.8660    2.5000    0.0000 C   0  0  0  0  0  0  0  0  0  0  0  0
    0.8660    1.5000    0.0000 C   0  0  0  0  0  0  0  0  0  0  0  0
    1.7321    1.0000    0.0000 C   0  0  0  0  0  0  0  0  0  0  0  0
    2.5981    1.5000    0.0000 O   0  0  0  0  0  0  0  0  0  0  0  0
    1.7321    0.0000    0.0000 C   0  0  0  0  0  0  0  0  0  0  0  0
    2.5981   -0.5000    0.0000 O   0  0  0  0  0  0  0  0  0  0  0  0
    0.8660   -0.5000    0.0000 C   0  0  0  0  0  0  0  0  0  0  0  0
    0.8660   -1.5000    0.0000 O   0  0  0  0  0  0  0  0  0  0  0  0
    0.0000    0.0000    0.0000 C   0  0  0  0  0  0  0  0  0  0  0  0
   -0.9511   -0.3090    0.0000 N   0  0  0  0  0  0  0  0  0  0  0  0
   -1.5388    0.5000    0.0000 N   0  0  0  0  0  0  0  0  0  0  0  0
   -0.9511    1.3090    0.0000 N   0  0  0  0  0  0  0  0  0  0  0  0
   -0.0000    1.0000    0.0000 N   0  0  0  0  0  0  0  0  0  0  0  0
  1  2  1  0
  2  3  1  0
  3  4  1  0
  4  5  1  0
  4  6  1  0
  6  7  1  0
  6  8  1  0
  8  9  1  0
  8 10  1  0
 10 11  2  0
 11 12  1  0
 12 13  2  0
 13 14  1  0
 14  3  1  0
 14 10  1  0
M  END
>  <group_A>  (138) 
1

>  <group_B>  (138) 
0

>  <group_C>  (138) 
0

>  <group_D>  (138) 
0

>  <group_G>  (138) 
0

>  <group_H>  (138) 
0

>  <group_J>  (138) 
0

>  <group_L>  (138) 
0

>  <group_M>  (138) 
0

>  <group_N>  (138) 
0

>  <group_P>  (138) 
0

>  <group_R>  (138) 
0

>  <group_S>  (138) 
0

>  <group_V>  (138) 
0

$$$$

     RDKit          2D

 12 12  0  0  0  0  0  0  0  0999 V2000
   -0.0000   -1.0000    0.0000 O   0  0  0  0  0  0  0  0  0  0  0  0
    0.0000    0.0000    0.0000 C   0  0  0  0  0  0  0  0  0  0  0  0
   -0.8660    0.5000    0.0000 O   0  0  0  0  0  0  0  0  0  0  0  0
   -0.8660    1.5000    0.0000 C   0  0  0  0  0  0  0  0  0  0  0  0
   -1.7321    2.0000    0.0000 C   0  0  0  0  0  0  0  0  0  0  0  0
   -2.5981    1.5000    0.0000 O   0  0  0  0  0  0  0  0  0  0  0  0
    0.0000    2.0000    0.0000 C   0  0  0  0  0  0  0  0  0  0  0  0
    0.0000    3.0000    0.0000 O   0  0  0  0  0  0  0  0  0  0  0  0
    0.8660    1.5000    0.0000 C   0  0  0  0  0  0  0  0  0  0  0  0
    1.7321    2.0000    0.0000 O   0  0  0  0  0  0  0  0  0  0  0  0
    0.8660    0.5000    0.0000 C   0  0  0  0  0  0  0  0  0  0  0  0
    1.7321    0.0000    0.0000 O   0  0  0  0  0  0  0  0  0  0  0  0
  1  2  2  0
  2  3  1  0
  3  4  1  0
  4  5  1  0
  4  7  1  0
  5  6  1  0
  7  8  1  0
  7  9  1  0
  9 10  1  0
  9 11  1  0
 11 12  1  0
 11  2  1  0
M  END
>  <group_A>  (139) 
1

>  <group_B>  (139) 
1

>  <group_C>  (139) 
1

>  <group_D>  (139) 
0

>  <group_G>  (139) 
0

>  <group_H>  (139) 
0

>  <group_J>  (139) 
0

>  <group_L>  (139) 
0

>  <group_M>  (139) 
0

>  <group_N>  (139) 
0

>  <group_P>  (139) 
0

>  <group_R>  (139) 
0

>  <group_S>  (139) 
0

>  <group_V>  (139) 
1

$$$$

     RDKit          2D

 13 12  0  0  0  0  0  0  0  0999 V2000
   -1.7321    0.0000    0.0000 C   0  0  0  0  0  0  0  0  0  0  0  0
   -1.7321   -1.0000    0.0000 C   0  0  0  0  0  0  0  0  0  0  0  0
   -2.5981   -1.5000    0.0000 C   0  0  0  0  0  0  0  0  0  0  0  0
   -3.4641   -1.0000    0.0000 C   0  0  0  0  0  0  0  0  0  0  0  0
   -4.3301   -1.5000    0.0000 C   0  0  0  0  0  0  0  0  0  0  0  0
   -5.1962   -1.0000    0.0000 N   0  0  0  0  0  0  0  0  0  0  0  0
   -4.3301   -2.5000    0.0000 C   0  0  0  0  0  0  0  0  0  0  0  0
   -5.1962   -3.0000    0.0000 O   0  0  0  0  0  0  0  0  0  0  0  0
   -3.4641   -3.0000    0.0000 O   0  0  0  0  0  0  0  0  0  0  0  0
   -0.8660   -1.5000    0.0000 N   0  0  0  0  0  0  0  0  0  0  0  0
   -0.0000   -1.0000    0.0000 C   0  0  0  0  0  0  0  0  0  0  0  0
    0.8660   -1.5000    0.0000 N   0  0  0  0  0  0  0  0  0  0  0  0
    0.0000   -0.0000    0.0000 N   0  0  0  0  0  0  0  0  0  0  0  0
  1  2  1  0
  2  3  1  0
  2 10  1  0
  3  4  1  0
  4  5  1  0
  5  6  1  0
  5  7  1  0
  7  8  2  0
  7  9  1  0
 10 11  1  0
 11 12  1  0
 11 13  2  0
M  CHG  1  13   1
M  END
>  <group_A>  (140) 
1

>  <group_B>  (140) 
0

>  <group_C>  (140) 
0

>  <group_D>  (140) 
0

>  <group_G>  (140) 
1

>  <group_H>  (140) 
0

>  <group_J>  (140) 
0

>  <group_L>  (140) 
0

>  <group_M>  (140) 
0

>  <group_N>  (140) 
0

>  <group_P>  (140) 
0

>  <group_R>  (140) 
0

>  <group_S>  (140) 
1

>  <group_V>  (140) 
0

$$$$

     RDKit          2D

  7  6  0  0  0  0  0  0  0  0999 V2000
    1.0000   -1.0000    0.0000 O   0  0  0  0  0  0  0  0  0  0  0  0
    1.0000   -0.0000    0.0000 S   0  0  0  0  0  0  0  0  0  0  0  0
    2.0000    0.0000    0.0000 O   0  0  0  0  0  0  0  0  0  0  0  0
    1.0000    1.0000    0.0000 O   0  0  0  0  0  0  0  0  0  0  0  0
    0.0000    0.0000    0.0000 C   0  0  0  0  0  0  0  0  0  0  0  0
   -0.5000    0.8660    0.0000 C   0  0  0  0  0  0  0  0  0  0  0  0
   -1.5000    0.8660    0.0000 S   0  0  0  0  0  0  0  0  0  0  0  0
  1  2  2  0
  2  3  2  0
  2  4  1  0
  2  5  1  0
  5  6  1  0
  6  7  1  0
M  END
>  <group_A>  (141) 
1

>  <group_B>  (141) 
0

>  <group_C>  (141) 
0

>  <group_D>  (141) 
0

>  <group_G>  (141) 
1

>  <group_H>  (141) 
0

>  <group_J>  (141) 
0

>  <group_L>  (141) 
0

>  <group_M>  (141) 
0

>  <group_N>  (141) 
0

>  <group_P>  (141) 
0

>  <group_R>  (141) 
0

>  <group_S>  (141) 
1

>  <group_V>  (141) 
0

$$$$

     RDKit          2D

  5  4  0  0  0  0  0  0  0  0999 V2000
    1.7321    1.0000    0.0000 N   0  0  0  0  0  0  0  0  0  0  0  0
    0.8660    1.5000    0.0000 C   0  0  0  0  0  0  0  0  0  0  0  0
    0.0000    1.0000    0.0000 C   0  0  0  0  0  0  0  0  0  0  0  0
   -0.8660    1.5000    0.0000 O   0  0  0  0  0  0  0  0  0  0  0  0
   -0.0000   -0.0000    0.0000 S   0  0  0  0  0  0  0  0  0  0  0  0
  1  2  1  0
  2  3  1  0
  3  4  2  0
  3  5  1  0
M  END
>  <group_A>  (142) 
1

>  <group_B>  (142) 
0

>  <group_C>  (142) 
0

>  <group_D>  (142) 
0

>  <group_G>  (142) 
1

>  <group_H>  (142) 
0

>  <group_J>  (142) 
0

>  <group_L>  (142) 
0

>  <group_M>  (142) 
0

>  <group_N>  (142) 
0

>  <group_P>  (142) 
0

>  <group_R>  (142) 
0

>  <group_S>  (142) 
1

>  <group_V>  (142) 
0

$$$$

     RDKit          2D

 12 12  0  0  0  0  0  0  0  0999 V2000
    0.5878   -0.8090    0.0000 C   0  0  0  0  0  0  0  0  0  0  0  0
   -0.0000   -0.0000    0.0000 N   0  0  0  0  0  0  0  0  0  0  0  0
   -1.0000   -0.0000    0.0000 C   0  0  0  0  0  0  0  0  0  0  0  0
   -1.3090    0.9511    0.0000 N   0  0  0  0  0  0  0  0  0  0  0  0
   -0.5000    1.5388    0.0000 C   0  0  0  0  0  0  0  0  0  0  0  0
    0.3090    0.9511    0.0000 C   0  0  0  0  0  0  0  0  0  0  0  0
    1.2601    1.2601    0.0000 C   0  0  0  0  0  0  0  0  0  0  0  0
    2.0032    0.5909    0.0000 C   0  0  0  0  0  0  0  0  0  0  0  0
    1.7953   -0.3872    0.0000 N   0  0  0  0  0  0  0  0  0  0  0  0
    2.9543    0.9000    0.0000 C   0  0  0  0  0  0  0  0  0  0  0  0
    3.6974    0.2308    0.0000 O   0  0  0  0  0  0  0  0  0  0  0  0
    3.1622    1.8781    0.0000 O   0  0  0  0  0  0  0  0  0  0  0  0
  1  2  1  0
  2  3  1  0
  3  4  2  0
  4  5  1  0
  5  6  2  0
  6  7  1  0
  6  2  1  0
  7  8  1  0
  8  9  1  0
  8 10  1  0
 10 11  2  0
 10 12  1  0
M  END
>  <group_A>  (143) 
1

>  <group_B>  (143) 
0

>  <group_C>  (143) 
0

>  <group_D>  (143) 
0

>  <group_G>  (143) 
1

>  <group_H>  (143) 
0

>  <group_J>  (143) 
0

>  <group_L>  (143) 
0

>  <group_M>  (143) 
0

>  <group_N>  (143) 
0

>  <group_P>  (143) 
0

>  <group_R>  (143) 
0

>  <group_S>  (143) 
1

>  <group_V>  (143) 
0

$$$$

     RDKit          2D

 10  9  0  0  0  0  0  0  0  0999 V2000
    0.1340   -2.5000    0.0000 N   0  0  0  0  0  0  0  0  0  0  0  0
    0.1340   -1.5000    0.0000 C   0  0  0  0  0  0  0  0  0  0  0  0
    1.0000   -1.0000    0.0000 C   0  0  0  0  0  0  0  0  0  0  0  0
    1.0000   -0.0000    0.0000 S   0  0  0  0  0  0  0  0  0  0  0  0
    2.0000   -0.0000    0.0000 O   0  0  0  0  0  0  0  0  0  0  0  0
    1.0000    1.0000    0.0000 O   0  0  0  0  0  0  0  0  0  0  0  0
    0.0000    0.0000    0.0000 O   0  0  0  0  0  0  0  0  0  0  0  0
   -0.7321   -1.0000    0.0000 C   0  0  0  0  0  0  0  0  0  0  0  0
   -0.7321   -0.0000    0.0000 O   0  0  0  0  0  0  0  0  0  0  0  0
   -1.5981   -1.5000    0.0000 O   0  0  0  0  0  0  0  0  0  0  0  0
  1  2  1  0
  2  3  1  0
  2  8  1  0
  3  4  1  0
  4  5  2  0
  4  6  2  0
  4  7  1  0
  8  9  2  0
  8 10  1  0
M  END
>  <group_A>  (144) 
1

>  <group_B>  (144) 
1

>  <group_C>  (144) 
1

>  <group_D>  (144) 
0

>  <group_G>  (144) 
1

>  <group_H>  (144) 
0

>  <group_J>  (144) 
0

>  <group_L>  (144) 
0

>  <group_M>  (144) 
1

>  <group_N>  (144) 
0

>  <group_P>  (144) 
0

>  <group_R>  (144) 
0

>  <group_S>  (144) 
1

>  <group_V>  (144) 
1

$$$$

     RDKit          2D

  8  7  0  0  0  0  0  0  0  0999 V2000
    0.8660   -0.5000    0.0000 C   0  0  0  0  0  0  0  0  0  0  0  0
    1.7321    0.0000    0.0000 S   0  0  0  0  0  0  0  0  0  0  0  0
    1.7321    1.0000    0.0000 C   0  0  0  0  0  0  0  0  0  0  0  0
    0.8660    1.5000    0.0000 C   0  0  0  0  0  0  0  0  0  0  0  0
    0.8660    2.5000    0.0000 N   0  0  0  0  0  0  0  0  0  0  0  0
   -0.0000    1.0000    0.0000 C   0  0  0  0  0  0  0  0  0  0  0  0
   -0.8660    1.5000    0.0000 O   0  0  0  0  0  0  0  0  0  0  0  0
    0.0000    0.0000    0.0000 O   0  0  0  0  0  0  0  0  0  0  0  0
  1  2  1  0
  2  3  1  0
  3  4  1  0
  4  5  1  0
  4  6  1  0
  6  7  2  0
  6  8  1  0
M  END
>  <group_A>  (145) 
1

>  <group_B>  (145) 
0

>  <group_C>  (145) 
0

>  <group_D>  (145) 
0

>  <group_G>  (145) 
1

>  <group_H>  (145) 
0

>  <group_J>  (145) 
0

>  <group_L>  (145) 
0

>  <group_M>  (145) 
0

>  <group_N>  (145) 
0

>  <group_P>  (145) 
0

>  <group_R>  (145) 
0

>  <group_S>  (145) 
1

>  <group_V>  (145) 
0

$$$$

     RDKit          2D

 21 20  0  0  0  0  0  0  0  0999 V2000
    0.1340   -2.5000    0.0000 C   0  0  0  0  0  0  0  0  0  0  0  0
    0.1340   -1.5000    0.0000 C   0  0  0  0  0  0  0  0  0  0  0  0
    1.0000   -1.0000    0.0000 O   0  0  0  0  0  0  0  0  0  0  0  0
    1.0000   -0.0000    0.0000 P   0  0  0  0  0  0  0  0  0  0  0  0
    2.0000   -0.0000    0.0000 O   0  0  0  0  0  0  0  0  0  0  0  0
    1.0000    1.0000    0.0000 O   0  0  0  0  0  0  0  0  0  0  0  0
    0.0000    0.0000    0.0000 O   0  0  0  0  0  0  0  0  0  0  0  0
   -0.7321   -1.0000    0.0000 C   0  0  0  0  0  0  0  0  0  0  0  0
   -0.7321   -0.0000    0.0000 N   0  0  0  0  0  0  0  0  0  0  0  0
   -1.5981    0.5000    0.0000 C   0  0  0  0  0  0  0  0  0  0  0  0
   -1.5981    1.5000    0.0000 O   0  0  0  0  0  0  0  0  0  0  0  0
   -2.4641   -0.0000    0.0000 C   0  0  0  0  0  0  0  0  0  0  0  0
   -3.3301    0.5000    0.0000 C   0  0  0  0  0  0  0  0  0  0  0  0
   -4.1962   -0.0000    0.0000 C   0  0  0  0  0  0  0  0  0  0  0  0
   -5.0622    0.5000    0.0000 C   0  0  0  0  0  0  0  0  0  0  0  0
   -5.9282   -0.0000    0.0000 C   0  0  0  0  0  0  0  0  0  0  0  0
   -6.7942    0.5000    0.0000 C   0  0  0  0  0  0  0  0  0  0  0  0
   -7.6603   -0.0000    0.0000 S   0  0  0  0  0  0  0  0  0  0  0  0
   -1.5981   -1.5000    0.0000 C   0  0  0  0  0  0  0  0  0  0  0  0
   -2.4641   -1.0000    0.0000 O   0  0  0  0  0  0  0  0  0  0  0  0
   -1.5981   -2.5000    0.0000 O   0  0  0  0  0  0  0  0  0  0  0  0
  1  2  1  0
  2  3  1  0
  2  8  1  0
  3  4  1  0
  4  5  2  0
  4  6  1  0
  4  7  1  0
  8  9  1  0
  8 19  1  0
  9 10  1  0
 10 11  2  0
 10 12  1  0
 12 13  1  0
 13 14  1  0
 14 15  1  0
 15 16  1  0
 16 17  1  0
 17 18  1  0
 19 20  2  0
 19 21  1  0
M  END
>  <group_A>  (146) 
1

>  <group_B>  (146) 
0

>  <group_C>  (146) 
0

>  <group_D>  (146) 
0

>  <group_G>  (146) 
1

>  <group_H>  (146) 
0

>  <group_J>  (146) 
0

>  <group_L>  (146) 
0

>  <group_M>  (146) 
0

>  <group_N>  (146) 
0

>  <group_P>  (146) 
0

>  <group_R>  (146) 
0

>  <group_S>  (146) 
1

>  <group_V>  (146) 
0

$$$$

     RDKit          2D

 12 12  0  0  0  0  0  0  0  0999 V2000
   -0.8660   -1.5000    0.0000 O   0  0  0  0  0  0  0  0  0  0  0  0
    0.0000   -1.0000    0.0000 C   0  0  0  0  0  0  0  0  0  0  0  0
    0.0000    0.0000    0.0000 C   0  0  0  0  0  0  0  0  0  0  0  0
   -0.8660    0.5000    0.0000 O   0  0  0  0  0  0  0  0  0  0  0  0
   -0.8660    1.5000    0.0000 C   0  0  0  0  0  0  0  0  0  0  0  0
   -1.7321    2.0000    0.0000 O   0  0  0  0  0  0  0  0  0  0  0  0
   -0.0000    2.0000    0.0000 C   0  0  0  0  0  0  0  0  0  0  0  0
    0.0000    3.0000    0.0000 F   0  0  0  0  0  0  0  0  0  0  0  0
    0.8660    1.5000    0.0000 C   0  0  0  0  0  0  0  0  0  0  0  0
    1.7321    2.0000    0.0000 O   0  0  0  0  0  0  0  0  0  0  0  0
    0.8660    0.5000    0.0000 C   0  0  0  0  0  0  0  0  0  0  0  0
    1.7321    0.0000    0.0000 O   0  0  0  0  0  0  0  0  0  0  0  0
  1  2  1  0
  2  3  1  0
  3  4  1  0
  4  5  1  0
  5  6  1  0
  5  7  1  0
  7  8  1  0
  7  9  1  0
  9 10  1  0
  9 11  1  0
 11 12  1  0
 11  3  1  0
M  END
>  <group_A>  (147) 
1

>  <group_B>  (147) 
1

>  <group_C>  (147) 
1

>  <group_D>  (147) 
0

>  <group_G>  (147) 
0

>  <group_H>  (147) 
0

>  <group_J>  (147) 
0

>  <group_L>  (147) 
0

>  <group_M>  (147) 
0

>  <group_N>  (147) 
0

>  <group_P>  (147) 
0

>  <group_R>  (147) 
0

>  <group_S>  (147) 
0

>  <group_V>  (147) 
1

$$$$

     RDKit          2D

 12 12  0  0  0  0  0  0  0  0999 V2000
    0.5878   -0.8090    0.0000 O   0  0  0  0  0  0  0  0  0  0  0  0
   -0.0000   -0.0000    0.0000 C   0  0  0  0  0  0  0  0  0  0  0  0
   -1.0000   -0.0000    0.0000 O   0  0  0  0  0  0  0  0  0  0  0  0
   -1.3090    0.9511    0.0000 C   0  0  0  0  0  0  0  0  0  0  0  0
   -2.2601    1.2601    0.0000 C   0  0  0  0  0  0  0  0  0  0  0  0
   -2.4680    2.2382    0.0000 O   0  0  0  0  0  0  0  0  0  0  0  0
   -3.0032    0.5909    0.0000 C   0  0  0  0  0  0  0  0  0  0  0  0
   -2.7953   -0.3872    0.0000 O   0  0  0  0  0  0  0  0  0  0  0  0
   -0.5000    1.5388    0.0000 C   0  0  0  0  0  0  0  0  0  0  0  0
   -0.5000    2.5388    0.0000 O   0  0  0  0  0  0  0  0  0  0  0  0
    0.3090    0.9511    0.0000 C   0  0  0  0  0  0  0  0  0  0  0  0
    1.2601    1.2601    0.0000 O   0  0  0  0  0  0  0  0  0  0  0  0
  1  2  2  0
  2  3  1  0
  3  4  1  0
  4  5  1  0
  4  9  1  0
  5  6  1  0
  5  7  1  0
  7  8  1  0
  9 10  1  0
  9 11  2  0
 11 12  1  0
 11  2  1  0
M  END
>  <group_A>  (148) 
1

>  <group_B>  (148) 
1

>  <group_C>  (148) 
1

>  <group_D>  (148) 
0

>  <group_G>  (148) 
0

>  <group_H>  (148) 
0

>  <group_J>  (148) 
0

>  <group_L>  (148) 
0

>  <group_M>  (148) 
0

>  <group_N>  (148) 
0

>  <group_P>  (148) 
0

>  <group_R>  (148) 
0

>  <group_S>  (148) 
0

>  <group_V>  (148) 
1

$$$$

     RDKit          2D

 10 10  0  0  0  0  0  0  0  0999 V2000
   -0.0000   -1.0000    0.0000 N   0  0  0  0  0  0  0  0  0  0  0  0
    0.0000    0.0000    0.0000 C   0  0  0  0  0  0  0  0  0  0  0  0
   -0.8660    0.5000    0.0000 C   0  0  0  0  0  0  0  0  0  0  0  0
   -0.8660    1.5000    0.0000 C   0  0  0  0  0  0  0  0  0  0  0  0
   -0.0000    2.0000    0.0000 C   0  0  0  0  0  0  0  0  0  0  0  0
    0.8660    1.5000    0.0000 C   0  0  0  0  0  0  0  0  0  0  0  0
    0.8660    0.5000    0.0000 C   0  0  0  0  0  0  0  0  0  0  0  0
    1.7321    0.0000    0.0000 C   0  0  0  0  0  0  0  0  0  0  0  0
    1.7321   -1.0000    0.0000 O   0  0  0  0  0  0  0  0  0  0  0  0
    2.5981    0.5000    0.0000 O   0  0  0  0  0  0  0  0  0  0  0  0
  1  2  1  0
  2  3  2  0
  3  4  1  0
  4  5  2  0
  5  6  1  0
  6  7  2  0
  7  8  1  0
  7  2  1  0
  8  9  2  0
  8 10  1  0
M  END
>  <group_A>  (149) 
1

>  <group_B>  (149) 
0

>  <group_C>  (149) 
0

>  <group_D>  (149) 
0

>  <group_G>  (149) 
0

>  <group_H>  (149) 
0

>  <group_J>  (149) 
0

>  <group_L>  (149) 
0

>  <group_M>  (149) 
0

>  <group_N>  (149) 
0

>  <group_P>  (149) 
0

>  <group_R>  (149) 
0

>  <group_S>  (149) 
0

>  <group_V>  (149) 
0

$$$$

     RDKit          2D

  8 12  0  0  0  0  0  0  0  0999 V2000
    1.1476   -0.0000    0.0000 S   0  0  0  0  0  3  0  0  0  0  0  0
    0.0000   -0.0000    0.0000 Fe  0  0  0  0  0  3  0  0  0  0  0  0
   -0.7032   -0.4052    0.0000 S   0  0  0  0  0  3  0  0  0  0  0  0
    0.4444   -0.4052    0.0000 Fe  0  0  0  0  0  3  0  0  0  0  0  0
    0.4444   -1.5535    0.0000 S   0  0  0  0  0  3  0  0  0  0  0  0
    1.1476   -1.1474    0.0000 Fe  0  0  0  0  0  3  0  0  0  0  0  0
    0.0000   -1.1474    0.0000 S   0  0  0  0  0  3  0  0  0  0  0  0
   -0.7032   -1.5535    0.0000 Fe  0  0  0  0  0  3  0  0  0  0  0  0
  1  2  1  0
  2  3  1  0
  3  4  1  0
  4  5  1  0
  4  1  1  0
  5  6  1  0
  6  7  1  0
  6  1  1  0
  7  8  1  0
  7  2  1  0
  8  5  1  0
  8  3  1  0
M  RAD  4   1   2   3   2   5   2   7   2
M  END
>  <group_A>  (150) 
1

>  <group_B>  (150) 
1

>  <group_C>  (150) 
0

>  <group_D>  (150) 
1

>  <group_G>  (150) 
1

>  <group_H>  (150) 
0

>  <group_J>  (150) 
0

>  <group_L>  (150) 
0

>  <group_M>  (150) 
0

>  <group_N>  (150) 
1

>  <group_P>  (150) 
0

>  <group_R>  (150) 
0

>  <group_S>  (150) 
1

>  <group_V>  (150) 
1

$$$$

     RDKit          2D

  1  0  0  0  0  0  0  0  0  0999 V2000
    1.0000    0.0000    0.0000 Xe  0  0  0  0  0 15  0  0  0  0  0  0
M  END
>  <group_A>  (151) 
1

>  <group_B>  (151) 
1

>  <group_C>  (151) 
0

>  <group_D>  (151) 
0

>  <group_G>  (151) 
1

>  <group_H>  (151) 
0

>  <group_J>  (151) 
0

>  <group_L>  (151) 
0

>  <group_M>  (151) 
0

>  <group_N>  (151) 
1

>  <group_P>  (151) 
0

>  <group_R>  (151) 
0

>  <group_S>  (151) 
1

>  <group_V>  (151) 
1

$$$$

     RDKit          2D

 15 14  0  0  0  0  0  0  0  0999 V2000
   -0.8660   -1.5000    0.0000 N   0  0  0  0  0  0  0  0  0  0  0  0
   -0.0000   -2.0000    0.0000 C   0  0  0  0  0  0  0  0  0  0  0  0
   -0.0000   -3.0000    0.0000 N   0  0  0  0  0  0  0  0  0  0  0  0
   -0.8660   -3.5000    0.0000 C   0  0  0  0  0  0  0  0  0  0  0  0
   -1.7321   -3.0000    0.0000 C   0  0  0  0  0  0  0  0  0  0  0  0
   -1.7321   -2.0000    0.0000 C   0  0  0  0  0  0  0  0  0  0  0  0
   -2.5981   -1.5000    0.0000 C   0  0  0  0  0  0  0  0  0  0  0  0
   -3.4641   -2.0000    0.0000 N   0  0  0  0  0  0  0  0  0  0  0  0
   -2.5981   -0.5000    0.0000 C   0  0  0  0  0  0  0  0  0  0  0  0
   -3.4641    0.0000    0.0000 O   0  0  0  0  0  0  0  0  0  0  0  0
   -1.7321    0.0000    0.0000 O   0  0  0  0  0  0  0  0  0  0  0  0
    0.8660   -1.5000    0.0000 N   0  0  0  0  0  0  0  0  0  0  0  0
    0.8660   -0.5000    0.0000 N   0  0  0  0  0  0  0  0  0  0  0  0
    1.7321   -0.0000    0.0000 O   0  0  0  0  0  0  0  0  0  0  0  0
    0.0000   -0.0000    0.0000 O   0  0  0  0  0  0  0  0  0  0  0  0
  1  2  2  0
  2  3  1  0
  2 12  1  0
  3  4  1  0
  4  5  1  0
  5  6  1  0
  6  7  1  0
  7  8  1  0
  7  9  1  0
  9 10  2  0
  9 11  1  0
 12 13  1  0
 13 14  2  0
 13 15  1  0
M  CHG  2  13   1  15  -1
M  END
>  <group_A>  (152) 
1

>  <group_B>  (152) 
0

>  <group_C>  (152) 
0

>  <group_D>  (152) 
0

>  <group_G>  (152) 
0

>  <group_H>  (152) 
0

>  <group_J>  (152) 
0

>  <group_L>  (152) 
0

>  <group_M>  (152) 
0

>  <group_N>  (152) 
0

>  <group_P>  (152) 
0

>  <group_R>  (152) 
0

>  <group_S>  (152) 
0

>  <group_V>  (152) 
0

$$$$

     RDKit          2D

 29 32  0  0  0  0  0  0  0  0999 V2000
    4.8363    3.9680    0.0000 C   0  0  0  0  0  0  0  0  0  0  0  0
    3.8581    3.7601    0.0000 C   0  0  0  0  0  0  0  0  0  0  0  0
    3.1890    4.5032    0.0000 C   0  0  0  0  0  0  0  0  0  0  0  0
    2.2109    4.2953    0.0000 C   0  0  0  0  0  0  0  0  0  0  0  0
    1.5417    5.0385    0.0000 C   0  0  0  0  0  0  0  0  0  0  0  0
    1.8508    5.9895    0.0000 O   0  0  0  0  0  0  0  0  0  0  0  0
    0.5636    4.8305    0.0000 O   0  0  0  0  0  0  0  0  0  0  0  0
    3.5491    2.8090    0.0000 C   0  0  0  0  0  0  0  0  0  0  0  0
    4.1369    2.0000    0.0000 C   0  0  0  0  0  0  0  0  0  0  0  0
    3.5491    1.1910    0.0000 C   0  0  0  0  0  0  0  0  0  0  0  0
    2.5981    1.5000    0.0000 C   0  0  0  0  0  0  0  0  0  0  0  0
    1.7321    1.0000    0.0000 C   0  0  0  0  0  0  0  0  0  0  0  0
    1.7321   -0.0000    0.0000 C   0  0  0  0  0  0  0  0  0  0  0  0
    2.5981   -0.5000    0.0000 O   0  0  0  0  0  0  0  0  0  0  0  0
    0.8660   -0.5000    0.0000 C   0  0  0  0  0  0  0  0  0  0  0  0
    0.0000   -0.0000    0.0000 C   0  0  0  0  0  0  0  0  0  0  0  0
   -0.8660   -0.5000    0.0000 C   0  0  0  0  0  0  0  0  0  0  0  0
   -1.7321    0.0000    0.0000 C   0  0  0  0  0  0  0  0  0  0  0  0
   -2.5981   -0.5000    0.0000 O   0  0  0  0  0  0  0  0  0  0  0  0
   -1.7321    1.0000    0.0000 C   0  0  0  0  0  0  0  0  0  0  0  0
   -0.8660    1.5000    0.0000 C   0  0  0  0  0  0  0  0  0  0  0  0
    0.0000    1.0000    0.0000 C   0  0  0  0  0  0  0  0  0  0  0  0
    0.0000    2.0000    0.0000 C   0  0  0  0  0  0  0  0  0  0  0  0
    0.8660    1.5000    0.0000 C   0  0  0  0  0  0  0  0  0  0  0  0
    0.8660    2.5000    0.0000 C   0  0  0  0  0  0  0  0  0  0  0  0
    1.7321    3.0000    0.0000 C   0  0  0  0  0  0  0  0  0  0  0  0
    1.7321    4.0000    0.0000 O   0  0  0  0  0  0  0  0  0  0  0  0
    2.5981    2.5000    0.0000 C   0  0  0  0  0  0  0  0  0  0  0  0
    2.1913    3.4135    0.0000 C   0  0  0  0  0  0  0  0  0  0  0  0
  1  2  1  0
  2  3  1  0
  2  8  1  0
  3  4  1  0
  4  5  1  0
  5  6  2  0
  5  7  1  0
  8  9  1  0
  9 10  1  0
 10 11  1  0
 11 12  1  0
 12 13  1  0
 13 14  1  0
 13 15  1  0
 15 16  1  0
 16 17  1  0
 17 18  1  0
 18 19  1  0
 18 20  1  0
 20 21  1  0
 21 22  1  0
 22 23  1  0
 22 24  1  0
 22 16  1  0
 24 25  1  0
 24 12  1  0
 25 26  1  0
 26 27  1  0
 26 28  1  0
 28 29  1  0
 28  8  1  0
 28 11  1  0
M  END
>  <group_A>  (153) 
1

>  <group_B>  (153) 
0

>  <group_C>  (153) 
0

>  <group_D>  (153) 
0

>  <group_G>  (153) 
0

>  <group_H>  (153) 
0

>  <group_J>  (153) 
0

>  <group_L>  (153) 
0

>  <group_M>  (153) 
0

>  <group_N>  (153) 
0

>  <group_P>  (153) 
0

>  <group_R>  (153) 
0

>  <group_S>  (153) 
0

>  <group_V>  (153) 
1

$$$$

     RDKit          2D

 42 45  0  0  0  0  0  0  0  0999 V2000
    6.9912    6.4860    0.0000 N   0  0  0  0  0  0  0  0  0  0  0  0
    6.4034    5.6770    0.0000 C   0  0  0  0  0  0  0  0  0  0  0  0
    6.8101    4.7635    0.0000 C   0  0  0  0  0  0  0  0  0  0  0  0
    6.2223    3.9544    0.0000 O   0  0  0  0  0  0  0  0  0  0  0  0
    6.6291    3.0409    0.0000 C   0  0  0  0  0  0  0  0  0  0  0  0
    6.0413    2.2319    0.0000 O   0  0  0  0  0  0  0  0  0  0  0  0
    5.0468    2.3364    0.0000 C   0  0  0  0  0  0  0  0  0  0  0  0
    4.5468    3.2024    0.0000 C   0  0  0  0  0  0  0  0  0  0  0  0
    4.9535    4.1160    0.0000 C   0  0  0  0  0  0  0  0  0  0  0  0
    4.3657    4.9250    0.0000 O   0  0  0  0  0  0  0  0  0  0  0  0
    3.5686    2.9945    0.0000 O   0  0  0  0  0  0  0  0  0  0  0  0
    3.4641    2.0000    0.0000 C   0  0  0  0  0  0  0  0  0  0  0  0
    2.5981    1.5000    0.0000 O   0  0  0  0  0  0  0  0  0  0  0  0
    1.7321    2.0000    0.0000 C   0  0  0  0  0  0  0  0  0  0  0  0
    1.7321    3.0000    0.0000 C   0  0  0  0  0  0  0  0  0  0  0  0
    2.5981    3.5000    0.0000 O   0  0  0  0  0  0  0  0  0  0  0  0
    0.8660    3.5000    0.0000 C   0  0  0  0  0  0  0  0  0  0  0  0
    0.8660    4.5000    0.0000 N   0  0  0  0  0  0  0  0  0  0  0  0
    0.0000    3.0000    0.0000 C   0  0  0  0  0  0  0  0  0  0  0  0
    0.0000    2.0000    0.0000 C   0  0  0  0  0  0  0  0  0  0  0  0
   -0.8660    1.5000    0.0000 N   0  0  0  0  0  0  0  0  0  0  0  0
    0.8660    1.5000    0.0000 C   0  0  0  0  0  0  0  0  0  0  0  0
    0.8660    0.5000    0.0000 O   0  0  0  0  0  0  0  0  0  0  0  0
    0.0000   -0.0000    0.0000 C   0  0  0  0  0  0  0  0  0  0  0  0
   -0.8660    0.5000    0.0000 O   0  0  0  0  0  0  0  0  0  0  0  0
   -1.7321    0.0000    0.0000 C   0  0  0  0  0  0  0  0  0  0  0  0
   -2.5981    0.5000    0.0000 C   0  0  0  0  0  0  0  0  0  0  0  0
   -3.4641    0.0000    0.0000 N   0  0  0  0  0  0  0  0  0  0  0  0
   -1.7321   -1.0000    0.0000 C   0  0  0  0  0  0  0  0  0  0  0  0
   -2.5981   -1.5000    0.0000 O   0  0  0  0  0  0  0  0  0  0  0  0
   -0.8660   -1.5000    0.0000 C   0  0  0  0  0  0  0  0  0  0  0  0
   -0.8660   -2.5000    0.0000 O   0  0  0  0  0  0  0  0  0  0  0  0
   -0.0000   -1.0000    0.0000 C   0  0  0  0  0  0  0  0  0  0  0  0
    0.8660   -1.5000    0.0000 N   0  0  0  0  0  0  0  0  0  0  0  0
    4.3776    1.5933    0.0000 C   0  0  0  0  0  0  0  0  0  0  0  0
    4.5856    0.6151    0.0000 O   0  0  0  0  0  0  0  0  0  0  0  0
    7.6236    2.9364    0.0000 C   0  0  0  0  0  0  0  0  0  0  0  0
    8.0303    2.0228    0.0000 N   0  0  0  0  0  0  0  0  0  0  0  0
    8.2114    3.7454    0.0000 C   0  0  0  0  0  0  0  0  0  0  0  0
    9.2059    3.6409    0.0000 O   0  0  0  0  0  0  0  0  0  0  0  0
    7.8047    4.6589    0.0000 C   0  0  0  0  0  0  0  0  0  0  0  0
    8.3924    5.4679    0.0000 O   0  0  0  0  0  0  0  0  0  0  0  0
  1  2  1  0
  2  3  1  0
  3  4  1  0
  4  5  1  0
  5  6  1  0
  5 37  1  0
  6  7  1  0
  7  8  1  0
  8  9  1  0
  8 11  1  0
  9 10  1  0
 11 12  1  0
 12 13  1  0
 12 35  1  0
 13 14  1  0
 14 15  1  0
 15 16  1  0
 15 17  1  0
 17 18  1  0
 17 19  1  0
 19 20  1  0
 20 21  1  0
 20 22  1  0
 22 23  1  0
 22 14  1  0
 23 24  1  0
 24 25  1  0
 25 26  1  0
 26 27  1  0
 26 29  1  0
 27 28  1  0
 29 30  1  0
 29 31  1  0
 31 32  1  0
 31 33  1  0
 33 34  1  0
 33 24  1  0
 35 36  1  0
 35  7  1  0
 37 38  1  0
 37 39  1  0
 39 40  1  0
 39 41  1  0
 41 42  1  0
 41  3  1  0
M  END
>  <group_A>  (154) 
1

>  <group_B>  (154) 
1

>  <group_C>  (154) 
0

>  <group_D>  (154) 
1

>  <group_G>  (154) 
0

>  <group_H>  (154) 
0

>  <group_J>  (154) 
1

>  <group_L>  (154) 
0

>  <group_M>  (154) 
0

>  <group_N>  (154) 
0

>  <group_P>  (154) 
0

>  <group_R>  (154) 
1

>  <group_S>  (154) 
1

>  <group_V>  (154) 
0

$$$$

     RDKit          2D

  9  8  0  0  0  0  0  0  0  0999 V2000
    1.7321   -1.0000    0.0000 N   0  0  0  0  0  0  0  0  0  0  0  0
    1.7321    0.0000    0.0000 C   0  0  0  0  0  0  0  0  0  0  0  0
    2.5981    0.5000    0.0000 C   0  0  0  0  0  0  0  0  0  0  0  0
    2.5981    1.5000    0.0000 C   0  0  0  0  0  0  0  0  0  0  0  0
    3.4641    2.0000    0.0000 O   0  0  0  0  0  0  0  0  0  0  0  0
    1.7321    2.0000    0.0000 O   0  0  0  0  0  0  0  0  0  0  0  0
    0.8660    0.5000    0.0000 C   0  0  0  0  0  0  0  0  0  0  0  0
    0.8660    1.5000    0.0000 O   0  0  0  0  0  0  0  0  0  0  0  0
    0.0000    0.0000    0.0000 O   0  0  0  0  0  0  0  0  0  0  0  0
  1  2  1  0
  2  3  1  0
  2  7  1  0
  3  4  1  0
  4  5  2  0
  4  6  1  0
  7  8  2  0
  7  9  1  0
M  END
>  <group_A>  (155) 
1

>  <group_B>  (155) 
0

>  <group_C>  (155) 
0

>  <group_D>  (155) 
0

>  <group_G>  (155) 
1

>  <group_H>  (155) 
0

>  <group_J>  (155) 
0

>  <group_L>  (155) 
0

>  <group_M>  (155) 
0

>  <group_N>  (155) 
0

>  <group_P>  (155) 
0

>  <group_R>  (155) 
0

>  <group_S>  (155) 
1

>  <group_V>  (155) 
0

$$$$

     RDKit          2D

  3  2  0  0  0  0  0  0  0  0999 V2000
    2.0000   -0.0000    0.0000 N   0  0  0  0  0  0  0  0  0  0  0  0
    1.0000   -0.0000    0.0000 N   0  0  0  0  0  0  0  0  0  0  0  0
   -0.0000   -0.0000    0.0000 N   0  0  0  0  0  0  0  0  0  0  0  0
  1  2  2  0
  2  3  2  0
M  CHG  3   1  -1   2   1   3  -1
M  END
>  <group_A>  (156) 
1

>  <group_B>  (156) 
1

>  <group_C>  (156) 
0

>  <group_D>  (156) 
0

>  <group_G>  (156) 
1

>  <group_H>  (156) 
0

>  <group_J>  (156) 
0

>  <group_L>  (156) 
0

>  <group_M>  (156) 
0

>  <group_N>  (156) 
0

>  <group_P>  (156) 
0

>  <group_R>  (156) 
0

>  <group_S>  (156) 
1

>  <group_V>  (156) 
1

$$$$

     RDKit          2D

 15 15  0  0  0  0  0  0  0  0999 V2000
   -1.7321   -1.0000    0.0000 C   0  0  0  0  0  0  0  0  0  0  0  0
   -0.8660   -1.5000    0.0000 C   0  0  0  0  0  0  0  0  0  0  0  0
   -0.8660   -2.5000    0.0000 O   0  0  0  0  0  0  0  0  0  0  0  0
   -0.0000   -1.0000    0.0000 N   0  0  0  0  0  0  0  0  0  0  0  0
    0.0000   -0.0000    0.0000 C   0  0  0  0  0  0  0  0  0  0  0  0
   -0.8660    0.5000    0.0000 O   0  0  0  0  0  0  0  0  0  0  0  0
   -0.8660    1.5000    0.0000 C   0  0  0  0  0  0  0  0  0  0  0  0
   -1.7321    2.0000    0.0000 C   0  0  0  0  0  0  0  0  0  0  0  0
   -1.7321    3.0000    0.0000 O   0  0  0  0  0  0  0  0  0  0  0  0
    0.0000    2.0000    0.0000 C   0  0  0  0  0  0  0  0  0  0  0  0
    0.0000    3.0000    0.0000 O   0  0  0  0  0  0  0  0  0  0  0  0
    0.8660    1.5000    0.0000 C   0  0  0  0  0  0  0  0  0  0  0  0
    1.7321    2.0000    0.0000 O   0  0  0  0  0  0  0  0  0  0  0  0
    0.8660    0.5000    0.0000 C   0  0  0  0  0  0  0  0  0  0  0  0
    1.7321    0.0000    0.0000 O   0  0  0  0  0  0  0  0  0  0  0  0
  1  2  1  0
  2  3  2  0
  2  4  1  0
  4  5  1  0
  5  6  1  0
  6  7  1  0
  7  8  1  0
  7 10  1  0
  8  9  1  0
 10 11  1  0
 10 12  1  0
 12 13  1  0
 12 14  1  0
 14 15  1  0
 14  5  1  0
M  END
>  <group_A>  (157) 
1

>  <group_B>  (157) 
0

>  <group_C>  (157) 
0

>  <group_D>  (157) 
0

>  <group_G>  (157) 
0

>  <group_H>  (157) 
0

>  <group_J>  (157) 
0

>  <group_L>  (157) 
0

>  <group_M>  (157) 
0

>  <group_N>  (157) 
1

>  <group_P>  (157) 
0

>  <group_R>  (157) 
0

>  <group_S>  (157) 
0

>  <group_V>  (157) 
0

$$$$

     RDKit          2D

 34 36  0  0  0  0  0  0  0  0999 V2000
    2.5981   -0.5000    0.0000 N   0  0  0  0  0  0  0  0  0  0  0  0
    1.7321    0.0000    0.0000 C   0  0  0  0  0  0  0  0  0  0  0  0
    0.8660   -0.5000    0.0000 N   0  0  0  0  0  0  0  0  0  0  0  0
   -0.0000   -0.0000    0.0000 C   0  0  0  0  0  0  0  0  0  0  0  0
   -0.0000    1.0000    0.0000 C   0  0  0  0  0  0  0  0  0  0  0  0
    0.8660    1.5000    0.0000 C   0  0  0  0  0  0  0  0  0  0  0  0
    0.8660    2.5000    0.0000 O   0  0  0  0  0  0  0  0  0  0  0  0
    1.7321    1.0000    0.0000 N   0  0  0  0  0  0  0  0  0  0  0  0
   -0.8660    1.5000    0.0000 N   0  0  0  0  0  0  0  0  0  0  0  0
   -0.8660    2.5000    0.0000 C   0  0  0  0  0  0  0  0  0  0  0  0
   -1.7321    3.0000    0.0000 O   0  0  0  0  0  0  0  0  0  0  0  0
   -1.7321    1.0000    0.0000 C   0  0  0  0  0  0  0  0  0  0  0  0
   -2.5981    1.5000    0.0000 C   0  0  0  0  0  0  0  0  0  0  0  0
   -3.4641    1.0000    0.0000 N   0  0  0  0  0  0  0  0  0  0  0  0
   -3.4641    0.0000    0.0000 C   0  0  0  0  0  0  0  0  0  0  0  0
   -2.5981   -0.5000    0.0000 C   0  0  0  0  0  0  0  0  0  0  0  0
   -2.5981   -1.5000    0.0000 C   0  0  0  0  0  0  0  0  0  0  0  0
   -3.4641   -2.0000    0.0000 C   0  0  0  0  0  0  0  0  0  0  0  0
   -3.4641   -3.0000    0.0000 C   0  0  0  0  0  0  0  0  0  0  0  0
   -4.3301   -3.5000    0.0000 O   0  0  0  0  0  0  0  0  0  0  0  0
   -2.5981   -3.5000    0.0000 N   0  0  0  0  0  0  0  0  0  0  0  0
   -2.5981   -4.5000    0.0000 C   0  0  0  0  0  0  0  0  0  0  0  0
   -3.4641   -5.0000    0.0000 C   0  0  0  0  0  0  0  0  0  0  0  0
   -3.4641   -6.0000    0.0000 C   0  0  0  0  0  0  0  0  0  0  0  0
   -4.3301   -6.5000    0.0000 C   0  0  0  0  0  0  0  0  0  0  0  0
   -5.1962   -6.0000    0.0000 O   0  0  0  0  0  0  0  0  0  0  0  0
   -4.3301   -7.5000    0.0000 O   0  0  0  0  0  0  0  0  0  0  0  0
   -1.7321   -5.0000    0.0000 C   0  0  0  0  0  0  0  0  0  0  0  0
   -1.7321   -6.0000    0.0000 O   0  0  0  0  0  0  0  0  0  0  0  0
   -0.8660   -4.5000    0.0000 O   0  0  0  0  0  0  0  0  0  0  0  0
   -4.3301   -1.5000    0.0000 C   0  0  0  0  0  0  0  0  0  0  0  0
   -4.3301   -0.5000    0.0000 C   0  0  0  0  0  0  0  0  0  0  0  0
   -1.7321    0.0000    0.0000 C   0  0  0  0  0  0  0  0  0  0  0  0
   -0.8660   -0.5000    0.0000 N   0  0  0  0  0  0  0  0  0  0  0  0
  1  2  1  0
  2  3  2  0
  3  4  1  0
  4  5  2  0
  5  6  1  0
  5  9  1  0
  6  7  2  0
  6  8  1  0
  8  2  1  0
  9 10  1  0
  9 12  1  0
 10 11  2  0
 12 13  1  0
 12 33  1  0
 13 14  1  0
 14 15  1  0
 15 16  2  0
 16 17  1  0
 17 18  2  0
 18 19  1  0
 18 31  1  0
 19 20  2  0
 19 21  1  0
 21 22  1  0
 22 23  1  0
 22 28  1  0
 23 24  1  0
 24 25  1  0
 25 26  2  0
 25 27  1  0
 28 29  2  0
 28 30  1  0
 31 32  2  0
 32 15  1  0
 33 34  1  0
 34  4  1  0
M  END
>  <group_A>  (158) 
0

>  <group_B>  (158) 
0

>  <group_C>  (158) 
0

>  <group_D>  (158) 
0

>  <group_G>  (158) 
0

>  <group_H>  (158) 
0

>  <group_J>  (158) 
0

>  <group_L>  (158) 
0

>  <group_M>  (158) 
0

>  <group_N>  (158) 
0

>  <group_P>  (158) 
0

>  <group_R>  (158) 
0

>  <group_S>  (158) 
0

>  <group_V>  (158) 
1

$$$$

     RDKit          2D

  5  4  0  0  0  0  0  0  0  0999 V2000
    1.7321    1.0000    0.0000 N   0  0  0  0  0  0  0  0  0  0  0  0
    0.8660    1.5000    0.0000 C   0  0  0  0  0  0  0  0  0  0  0  0
    0.0000    1.0000    0.0000 C   0  0  0  0  0  0  0  0  0  0  0  0
   -0.8660    1.5000    0.0000 O   0  0  0  0  0  0  0  0  0  0  0  0
   -0.0000   -0.0000    0.0000 O   0  0  0  0  0  0  0  0  0  0  0  0
  1  2  1  0
  2  3  1  0
  3  4  2  0
  3  5  1  0
M  END
>  <group_A>  (159) 
1

>  <group_B>  (159) 
1

>  <group_C>  (159) 
1

>  <group_D>  (159) 
0

>  <group_G>  (159) 
1

>  <group_H>  (159) 
0

>  <group_J>  (159) 
0

>  <group_L>  (159) 
0

>  <group_M>  (159) 
0

>  <group_N>  (159) 
0

>  <group_P>  (159) 
0

>  <group_R>  (159) 
0

>  <group_S>  (159) 
1

>  <group_V>  (159) 
1

$$$$

     RDKit          2D

 30 33  0  0  0  0  0  0  0  0999 V2000
    0.9306    3.6049    0.0000 O   0  0  0  0  0  0  0  0  0  0  0  0
    0.2235    2.8978    0.0000 C   0  0  0  0  0  0  0  0  0  0  0  0
    0.4824    1.9319    0.0000 N   0  0  0  0  0  0  0  0  0  0  0  0
    1.4483    1.6730    0.0000 C   0  0  0  0  0  0  0  0  0  0  0  0
    2.1554    2.3801    0.0000 C   0  0  0  0  0  0  0  0  0  0  0  0
    3.1213    2.1213    0.0000 C   0  0  0  0  0  0  0  0  0  0  0  0
    3.8284    2.8284    0.0000 C   0  0  0  0  0  0  0  0  0  0  0  0
    4.7944    2.5696    0.0000 C   0  0  0  0  0  0  0  0  0  0  0  0
    5.0532    1.6037    0.0000 C   0  0  0  0  0  0  0  0  0  0  0  0
    4.3461    0.8966    0.0000 C   0  0  0  0  0  0  0  0  0  0  0  0
    3.3801    1.1554    0.0000 C   0  0  0  0  0  0  0  0  0  0  0  0
    1.7071    0.7071    0.0000 C   0  0  0  0  0  0  0  0  0  0  0  0
    2.6730    0.4483    0.0000 O   0  0  0  0  0  0  0  0  0  0  0  0
    1.0000   -0.0000    0.0000 N   0  0  0  0  0  0  0  0  0  0  0  0
    0.0000   -0.0000    0.0000 C   0  0  0  0  0  0  0  0  0  0  0  0
   -0.0000   -1.0000    0.0000 C   0  0  0  0  0  0  0  0  0  0  0  0
   -0.7071   -1.7071    0.0000 C   0  0  0  0  0  0  0  0  0  0  0  0
   -0.4483   -2.6730    0.0000 O   0  0  0  0  0  0  0  0  0  0  0  0
   -1.6730   -1.4483    0.0000 O   0  0  0  0  0  0  0  0  0  0  0  0
    1.0000   -1.0000    0.0000 C   0  0  0  0  0  0  0  0  0  0  0  0
   -0.7424    3.1566    0.0000 C   0  0  0  0  0  0  0  0  0  0  0  0
   -1.5195    2.5273    0.0000 C   0  0  0  0  0  0  0  0  0  0  0  0
   -2.3582    3.0719    0.0000 C   0  0  0  0  0  0  0  0  0  0  0  0
   -3.3241    2.8131    0.0000 C   0  0  0  0  0  0  0  0  0  0  0  0
   -4.0312    3.5202    0.0000 C   0  0  0  0  0  0  0  0  0  0  0  0
   -4.9972    3.2614    0.0000 Cl  0  0  0  0  0  0  0  0  0  0  0  0
   -3.7724    4.4861    0.0000 C   0  0  0  0  0  0  0  0  0  0  0  0
   -2.8065    4.7449    0.0000 C   0  0  0  0  0  0  0  0  0  0  0  0
   -2.0994    4.0378    0.0000 C   0  0  0  0  0  0  0  0  0  0  0  0
   -1.1008    4.0902    0.0000 N   0  0  0  0  0  0  0  0  0  0  0  0
  1  2  2  0
  2  3  1  0
  2 21  1  0
  3  4  1  0
  4  5  1  0
  4 12  1  0
  5  6  1  0
  6  7  2  0
  7  8  1  0
  8  9  2  0
  9 10  1  0
 10 11  2  0
 11  6  1  0
 12 13  2  0
 12 14  1  0
 14 15  1  0
 15 16  1  0
 16 17  1  0
 16 20  1  0
 17 18  2  0
 17 19  1  0
 20 14  1  0
 21 22  2  0
 22 23  1  0
 23 24  2  0
 24 25  1  0
 25 26  1  0
 25 27  2  0
 27 28  1  0
 28 29  2  0
 29 30  1  0
 29 23  1  0
 30 21  1  0
M  END
>  <group_A>  (160) 
1

>  <group_B>  (160) 
0

>  <group_C>  (160) 
0

>  <group_D>  (160) 
0

>  <group_G>  (160) 
0

>  <group_H>  (160) 
0

>  <group_J>  (160) 
0

>  <group_L>  (160) 
0

>  <group_M>  (160) 
0

>  <group_N>  (160) 
0

>  <group_P>  (160) 
0

>  <group_R>  (160) 
0

>  <group_S>  (160) 
0

>  <group_V>  (160) 
0

$$$$

     RDKit          2D

  3  2  0  0  0  0  0  0  0  0999 V2000
    1.7321   -0.0000    0.0000 O   0  0  0  0  0  0  0  0  0  0  0  0
    0.8660    0.5000    0.0000 C   0  0  0  0  0  0  0  0  0  0  0  0
   -0.0000   -0.0000    0.0000 O   0  0  0  0  0  0  0  0  0  0  0  0
  1  2  2  0
  2  3  1  0
M  END
>  <group_A>  (161) 
1

>  <group_B>  (161) 
1

>  <group_C>  (161) 
1

>  <group_D>  (161) 
1

>  <group_G>  (161) 
1

>  <group_H>  (161) 
0

>  <group_J>  (161) 
1

>  <group_L>  (161) 
0

>  <group_M>  (161) 
1

>  <group_N>  (161) 
0

>  <group_P>  (161) 
0

>  <group_R>  (161) 
0

>  <group_S>  (161) 
1

>  <group_V>  (161) 
1

$$$$

     RDKit          2D

  6  5  0  0  0  0  0  0  0  0999 V2000
    3.4641   -1.0000    0.0000 N   0  0  0  0  0  0  0  0  0  0  0  0
    3.4641   -0.0000    0.0000 C   0  0  0  0  0  0  0  0  0  0  0  0
    2.5981    0.5000    0.0000 C   0  0  0  0  0  0  0  0  0  0  0  0
    1.7321   -0.0000    0.0000 C   0  0  0  0  0  0  0  0  0  0  0  0
    0.8660    0.5000    0.0000 C   0  0  0  0  0  0  0  0  0  0  0  0
   -0.0000   -0.0000    0.0000 N   0  0  0  0  0  0  0  0  0  0  0  0
  1  2  1  0
  2  3  1  0
  3  4  1  0
  4  5  1  0
  5  6  1  0
M  END
>  <group_A>  (162) 
1

>  <group_B>  (162) 
0

>  <group_C>  (162) 
0

>  <group_D>  (162) 
0

>  <group_G>  (162) 
0

>  <group_H>  (162) 
0

>  <group_J>  (162) 
1

>  <group_L>  (162) 
0

>  <group_M>  (162) 
0

>  <group_N>  (162) 
0

>  <group_P>  (162) 
0

>  <group_R>  (162) 
0

>  <group_S>  (162) 
1

>  <group_V>  (162) 
0

$$$$

     RDKit          2D

 12 11  0  0  0  0  0  0  0  0999 V2000
    1.7321    3.0000    0.0000 C   0  0  0  0  0  0  0  0  0  0  0  0
    0.8660    3.5000    0.0000 S   0  0  0  0  0  0  0  0  0  0  0  0
   -0.0000    3.0000    0.0000 C   0  0  0  0  0  0  0  0  0  0  0  0
   -0.0000    2.0000    0.0000 C   0  0  0  0  0  0  0  0  0  0  0  0
   -0.8660    1.5000    0.0000 C   0  0  0  0  0  0  0  0  0  0  0  0
   -1.7321    2.0000    0.0000 N   0  0  0  0  0  0  0  0  0  0  0  0
   -2.5981    1.5000    0.0000 C   0  0  0  0  0  0  0  0  0  0  0  0
   -3.4641    2.0000    0.0000 O   0  0  0  0  0  0  0  0  0  0  0  0
   -2.5981    0.5000    0.0000 O   0  0  0  0  0  0  0  0  0  0  0  0
   -0.8660    0.5000    0.0000 C   0  0  0  0  0  0  0  0  0  0  0  0
   -1.7321   -0.0000    0.0000 O   0  0  0  0  0  0  0  0  0  0  0  0
   -0.0000   -0.0000    0.0000 O   0  0  0  0  0  0  0  0  0  0  0  0
  1  2  1  0
  2  3  1  0
  3  4  1  0
  4  5  1  0
  5  6  1  0
  5 10  1  0
  6  7  1  0
  7  8  2  0
  7  9  1  0
 10 11  2  0
 10 12  1  0
M  END
>  <group_A>  (163) 
1

>  <group_B>  (163) 
0

>  <group_C>  (163) 
0

>  <group_D>  (163) 
0

>  <group_G>  (163) 
0

>  <group_H>  (163) 
0

>  <group_J>  (163) 
0

>  <group_L>  (163) 
0

>  <group_M>  (163) 
0

>  <group_N>  (163) 
0

>  <group_P>  (163) 
0

>  <group_R>  (163) 
0

>  <group_S>  (163) 
0

>  <group_V>  (163) 
0

$$$$

     RDKit          2D

 10  9  0  0  0  0  0  0  0  0999 V2000
    3.4641    0.0000    0.0000 C   0  0  0  0  0  0  0  0  0  0  0  0
    3.4641    1.0000    0.0000 S   0  0  0  0  0  0  0  0  0  0  0  0
    4.3301    1.5000    0.0000 O   0  0  0  0  0  0  0  0  0  0  0  0
    2.5981    1.5000    0.0000 C   0  0  0  0  0  0  0  0  0  0  0  0
    1.7321    1.0000    0.0000 C   0  0  0  0  0  0  0  0  0  0  0  0
    0.8660    1.5000    0.0000 C   0  0  0  0  0  0  0  0  0  0  0  0
    0.8660    2.5000    0.0000 N   0  0  0  0  0  0  0  0  0  0  0  0
   -0.0000    1.0000    0.0000 C   0  0  0  0  0  0  0  0  0  0  0  0
   -0.8660    1.5000    0.0000 O   0  0  0  0  0  0  0  0  0  0  0  0
   -0.0000   -0.0000    0.0000 O   0  0  0  0  0  0  0  0  0  0  0  0
  1  2  1  0
  2  3  2  0
  2  4  1  0
  4  5  1  0
  5  6  1  0
  6  7  1  0
  6  8  1  0
  8  9  2  0
  8 10  1  0
M  END
>  <group_A>  (164) 
1

>  <group_B>  (164) 
1

>  <group_C>  (164) 
1

>  <group_D>  (164) 
0

>  <group_G>  (164) 
1

>  <group_H>  (164) 
0

>  <group_J>  (164) 
0

>  <group_L>  (164) 
0

>  <group_M>  (164) 
0

>  <group_N>  (164) 
0

>  <group_P>  (164) 
0

>  <group_R>  (164) 
0

>  <group_S>  (164) 
1

>  <group_V>  (164) 
1

$$$$

     RDKit          2D

  4  3  0  0  0  0  0  0  0  0999 V2000
    1.7321   -0.0000    0.0000 F   0  0  0  0  0  0  0  0  0  0  0  0
    0.8660    0.5000    0.0000 Be  0  0  0  0  0  3  0  0  0  0  0  0
    0.8660    1.5000    0.0000 F   0  0  0  0  0  0  0  0  0  0  0  0
   -0.0000   -0.0000    0.0000 F   0  0  0  0  0  0  0  0  0  0  0  0
  1  2  1  0
  2  3  1  0
  2  4  1  0
M  CHG  1   2  -1
M  END
>  <group_A>  (165) 
1

>  <group_B>  (165) 
0

>  <group_C>  (165) 
0

>  <group_D>  (165) 
0

>  <group_G>  (165) 
1

>  <group_H>  (165) 
0

>  <group_J>  (165) 
0

>  <group_L>  (165) 
0

>  <group_M>  (165) 
0

>  <group_N>  (165) 
0

>  <group_P>  (165) 
0

>  <group_R>  (165) 
0

>  <group_S>  (165) 
1

>  <group_V>  (165) 
0

$$$$

     RDKit          2D

  4  3  0  0  0  0  0  0  0  0999 V2000
    1.7321   -0.0000    0.0000 C   0  0  0  0  0  0  0  0  0  0  0  0
    0.8660    0.5000    0.0000 C   0  0  0  0  0  0  0  0  0  0  0  0
    0.8660    1.5000    0.0000 C   0  0  0  0  0  0  0  0  0  0  0  0
   -0.0000   -0.0000    0.0000 O   0  0  0  0  0  0  0  0  0  0  0  0
  1  2  1  0
  2  3  1  0
  2  4  1  0
M  END
>  <group_A>  (166) 
1

>  <group_B>  (166) 
1

>  <group_C>  (166) 
1

>  <group_D>  (166) 
1

>  <group_G>  (166) 
1

>  <group_H>  (166) 
0

>  <group_J>  (166) 
1

>  <group_L>  (166) 
0

>  <group_M>  (166) 
1

>  <group_N>  (166) 
1

>  <group_P>  (166) 
0

>  <group_R>  (166) 
1

>  <group_S>  (166) 
1

>  <group_V>  (166) 
1

$$$$

     RDKit          2D

 14 14  0  0  0  0  0  0  0  0999 V2000
   -1.5981   -1.5000    0.0000 N   0  0  0  0  0  0  0  0  0  0  0  0
   -0.7321   -1.0000    0.0000 C   0  0  0  0  0  0  0  0  0  0  0  0
    0.1340   -1.5000    0.0000 C   0  0  0  0  0  0  0  0  0  0  0  0
    1.0000   -1.0000    0.0000 O   0  0  0  0  0  0  0  0  0  0  0  0
    1.0000    0.0000    0.0000 P   0  0  0  0  0  0  0  0  0  0  0  0
    2.0000   -0.0000    0.0000 O   0  0  0  0  0  0  0  0  0  0  0  0
    1.0000    1.0000    0.0000 O   0  0  0  0  0  0  0  0  0  0  0  0
    0.0000    0.0000    0.0000 O   0  0  0  0  0  0  0  0  0  0  0  0
   -0.7321   -0.0000    0.0000 C   0  0  0  0  0  0  0  0  0  0  0  0
   -1.5981    0.5000    0.0000 C   0  0  0  0  0  0  0  0  0  0  0  0
   -2.5116    0.0933    0.0000 C   0  0  0  0  0  0  0  0  0  0  0  0
   -3.1808    0.8364    0.0000 N   0  0  0  0  0  0  0  0  0  0  0  0
   -2.6808    1.7024    0.0000 C   0  0  0  0  0  0  0  0  0  0  0  0
   -1.7026    1.4945    0.0000 N   0  0  0  0  0  0  0  0  0  0  0  0
  1  2  1  0
  2  3  1  0
  2  9  1  0
  3  4  1  0
  4  5  1  0
  5  6  2  0
  5  7  1  0
  5  8  1  0
  9 10  1  0
 10 11  2  0
 11 12  1  0
 12 13  1  0
 13 14  2  0
 14 10  1  0
M  END
>  <group_A>  (167) 
1

>  <group_B>  (167) 
0

>  <group_C>  (167) 
0

>  <group_D>  (167) 
0

>  <group_G>  (167) 
0

>  <group_H>  (167) 
0

>  <group_J>  (167) 
0

>  <group_L>  (167) 
0

>  <group_M>  (167) 
0

>  <group_N>  (167) 
0

>  <group_P>  (167) 
0

>  <group_R>  (167) 
0

>  <group_S>  (167) 
0

>  <group_V>  (167) 
0

$$$$

     RDKit          2D

  4  3  0  0  0  0  0  0  0  0999 V2000
    1.7321   -0.0000    0.0000 O   0  0  0  0  0  0  0  0  0  0  0  0
    0.8660    0.5000    0.0000 Mo  0  0  0  0  0  5  0  0  0  0  0  0
    0.8660    1.5000    0.0000 O   0  0  0  0  0  0  0  0  0  0  0  0
   -0.0000   -0.0000    0.0000 S   0  0  0  0  0  0  0  0  0  0  0  0
  1  2  2  0
  2  3  2  0
  2  4  1  0
M  END
>  <group_A>  (168) 
1

>  <group_B>  (168) 
0

>  <group_C>  (168) 
0

>  <group_D>  (168) 
1

>  <group_G>  (168) 
0

>  <group_H>  (168) 
0

>  <group_J>  (168) 
0

>  <group_L>  (168) 
0

>  <group_M>  (168) 
0

>  <group_N>  (168) 
1

>  <group_P>  (168) 
0

>  <group_R>  (168) 
0

>  <group_S>  (168) 
1

>  <group_V>  (168) 
0

$$$$

     RDKit          2D

 24 26  0  0  0  0  0  0  0  0999 V2000
   -7.5000    1.5981    0.0000 N   0  0  0  0  0  0  0  0  0  0  0  0
   -7.0000    0.7321    0.0000 C   0  0  0  0  0  0  0  0  0  0  0  0
   -6.0000    0.7321    0.0000 N   0  0  0  0  0  0  0  0  0  0  0  0
   -5.5000   -0.1340    0.0000 C   0  0  0  0  0  0  0  0  0  0  0  0
   -6.0000   -1.0000    0.0000 C   0  0  0  0  0  0  0  0  0  0  0  0
   -7.0000   -1.0000    0.0000 C   0  0  0  0  0  0  0  0  0  0  0  0
   -7.5000   -1.8660    0.0000 O   0  0  0  0  0  0  0  0  0  0  0  0
   -7.5000   -0.1340    0.0000 N   0  0  0  0  0  0  0  0  0  0  0  0
   -5.5000   -1.8660    0.0000 N   0  0  0  0  0  0  0  0  0  0  0  0
   -4.5000   -1.8660    0.0000 C   0  0  0  0  0  0  0  0  0  0  0  0
   -4.0000   -2.7321    0.0000 C   0  0  0  0  0  0  0  0  0  0  0  0
   -4.5000   -3.5981    0.0000 S   0  0  0  0  0  0  0  0  0  0  0  0
   -3.0000   -2.7321    0.0000 C   0  0  0  0  0  0  0  0  0  0  0  0
   -2.5000   -3.5981    0.0000 S   0  0  0  0  0  0  0  0  0  0  0  0
   -2.5000   -1.8660    0.0000 C   0  0  0  0  0  0  0  0  0  0  0  0
   -1.5000   -1.8660    0.0000 C   0  0  0  0  0  0  0  0  0  0  0  0
   -1.0000   -1.0000    0.0000 O   0  0  0  0  0  0  0  0  0  0  0  0
    0.0000   -1.0000    0.0000 P   0  0  0  0  0  0  0  0  0  0  0  0
    0.0000   -2.0000    0.0000 O   0  0  0  0  0  0  0  0  0  0  0  0
    1.0000   -1.0000    0.0000 O   0  0  0  0  0  0  0  0  0  0  0  0
    0.0000   -0.0000    0.0000 O   0  0  0  0  0  0  0  0  0  0  0  0
   -3.0000   -1.0000    0.0000 O   0  0  0  0  0  0  0  0  0  0  0  0
   -4.0000   -1.0000    0.0000 C   0  0  0  0  0  0  0  0  0  0  0  0
   -4.5000   -0.1340    0.0000 N   0  0  0  0  0  0  0  0  0  0  0  0
  1  2  1  0
  2  3  2  0
  3  4  1  0
  4  5  2  0
  5  6  1  0
  5  9  1  0
  6  7  2  0
  6  8  1  0
  8  2  1  0
  9 10  1  0
 10 11  1  0
 11 12  1  0
 11 13  2  0
 13 14  1  0
 13 15  1  0
 15 16  1  0
 15 22  1  0
 16 17  1  0
 17 18  1  0
 18 19  2  0
 18 20  1  0
 18 21  1  0
 22 23  1  0
 23 24  1  0
 23 10  1  0
 24  4  1  0
M  END
>  <group_A>  (169) 
1

>  <group_B>  (169) 
0

>  <group_C>  (169) 
0

>  <group_D>  (169) 
1

>  <group_G>  (169) 
0

>  <group_H>  (169) 
0

>  <group_J>  (169) 
0

>  <group_L>  (169) 
0

>  <group_M>  (169) 
0

>  <group_N>  (169) 
1

>  <group_P>  (169) 
0

>  <group_R>  (169) 
0

>  <group_S>  (169) 
1

>  <group_V>  (169) 
0

$$$$

     RDKit          2D

 10 10  0  0  0  0  0  0  0  0999 V2000
   -0.8660   -1.5000    0.0000 O   0  0  0  0  0  0  0  0  0  0  0  0
   -0.0000   -1.0000    0.0000 C   0  0  0  0  0  0  0  0  0  0  0  0
    0.8660   -1.5000    0.0000 O   0  0  0  0  0  0  0  0  0  0  0  0
    0.0000    0.0000    0.0000 C   0  0  0  0  0  0  0  0  0  0  0  0
   -0.8660    0.5000    0.0000 C   0  0  0  0  0  0  0  0  0  0  0  0
   -0.8660    1.5000    0.0000 C   0  0  0  0  0  0  0  0  0  0  0  0
   -0.0000    2.0000    0.0000 C   0  0  0  0  0  0  0  0  0  0  0  0
    0.8660    1.5000    0.0000 C   0  0  0  0  0  0  0  0  0  0  0  0
    0.8660    0.5000    0.0000 C   0  0  0  0  0  0  0  0  0  0  0  0
    1.7321    0.0000    0.0000 O   0  0  0  0  0  0  0  0  0  0  0  0
  1  2  2  0
  2  3  1  0
  2  4  1  0
  4  5  2  0
  5  6  1  0
  6  7  2  0
  7  8  1  0
  8  9  2  0
  9 10  1  0
  9  4  1  0
M  END
>  <group_A>  (170) 
1

>  <group_B>  (170) 
1

>  <group_C>  (170) 
1

>  <group_D>  (170) 
1

>  <group_G>  (170) 
0

>  <group_H>  (170) 
0

>  <group_J>  (170) 
0

>  <group_L>  (170) 
0

>  <group_M>  (170) 
0

>  <group_N>  (170) 
1

>  <group_P>  (170) 
0

>  <group_R>  (170) 
0

>  <group_S>  (170) 
1

>  <group_V>  (170) 
1

$$$$

     RDKit          2D

 42 45  0  0  0  0  0  0  0  0999 V2000
    6.9912    6.4860    0.0000 N   0  0  0  0  0  0  0  0  0  0  0  0
    6.4034    5.6770    0.0000 C   0  0  0  0  0  0  0  0  0  0  0  0
    6.8101    4.7635    0.0000 C   0  0  0  0  0  0  0  0  0  0  0  0
    6.2223    3.9544    0.0000 O   0  0  0  0  0  0  0  0  0  0  0  0
    6.6291    3.0409    0.0000 C   0  0  0  0  0  0  0  0  0  0  0  0
    6.0413    2.2319    0.0000 O   0  0  0  0  0  0  0  0  0  0  0  0
    5.0468    2.3364    0.0000 C   0  0  0  0  0  0  0  0  0  0  0  0
    4.5468    3.2024    0.0000 C   0  0  0  0  0  0  0  0  0  0  0  0
    4.9535    4.1160    0.0000 C   0  0  0  0  0  0  0  0  0  0  0  0
    4.3657    4.9250    0.0000 O   0  0  0  0  0  0  0  0  0  0  0  0
    3.5686    2.9945    0.0000 O   0  0  0  0  0  0  0  0  0  0  0  0
    3.4641    2.0000    0.0000 C   0  0  0  0  0  0  0  0  0  0  0  0
    2.5981    1.5000    0.0000 O   0  0  0  0  0  0  0  0  0  0  0  0
    1.7321    2.0000    0.0000 C   0  0  0  0  0  0  0  0  0  0  0  0
    1.7321    3.0000    0.0000 C   0  0  0  0  0  0  0  0  0  0  0  0
    2.5981    3.5000    0.0000 O   0  0  0  0  0  0  0  0  0  0  0  0
    0.8660    3.5000    0.0000 C   0  0  0  0  0  0  0  0  0  0  0  0
    0.8660    4.5000    0.0000 N   0  0  0  0  0  0  0  0  0  0  0  0
    0.0000    3.0000    0.0000 C   0  0  0  0  0  0  0  0  0  0  0  0
    0.0000    2.0000    0.0000 C   0  0  0  0  0  0  0  0  0  0  0  0
   -0.8660    1.5000    0.0000 N   0  0  0  0  0  0  0  0  0  0  0  0
    0.8660    1.5000    0.0000 C   0  0  0  0  0  0  0  0  0  0  0  0
    0.8660    0.5000    0.0000 O   0  0  0  0  0  0  0  0  0  0  0  0
    0.0000   -0.0000    0.0000 C   0  0  0  0  0  0  0  0  0  0  0  0
   -0.8660    0.5000    0.0000 O   0  0  0  0  0  0  0  0  0  0  0  0
   -1.7321    0.0000    0.0000 C   0  0  0  0  0  0  0  0  0  0  0  0
   -2.5981    0.5000    0.0000 C   0  0  0  0  0  0  0  0  0  0  0  0
   -3.4641    0.0000    0.0000 O   0  0  0  0  0  0  0  0  0  0  0  0
   -1.7321   -1.0000    0.0000 C   0  0  0  0  0  0  0  0  0  0  0  0
   -2.5981   -1.5000    0.0000 O   0  0  0  0  0  0  0  0  0  0  0  0
   -0.8660   -1.5000    0.0000 C   0  0  0  0  0  0  0  0  0  0  0  0
   -0.8660   -2.5000    0.0000 O   0  0  0  0  0  0  0  0  0  0  0  0
   -0.0000   -1.0000    0.0000 C   0  0  0  0  0  0  0  0  0  0  0  0
    0.8660   -1.5000    0.0000 N   0  0  0  0  0  0  0  0  0  0  0  0
    4.3776    1.5933    0.0000 C   0  0  0  0  0  0  0  0  0  0  0  0
    4.5856    0.6151    0.0000 O   0  0  0  0  0  0  0  0  0  0  0  0
    7.6236    2.9364    0.0000 C   0  0  0  0  0  0  0  0  0  0  0  0
    8.0303    2.0228    0.0000 N   0  0  0  0  0  0  0  0  0  0  0  0
    8.2114    3.7454    0.0000 C   0  0  0  0  0  0  0  0  0  0  0  0
    9.2059    3.6409    0.0000 O   0  0  0  0  0  0  0  0  0  0  0  0
    7.8047    4.6589    0.0000 C   0  0  0  0  0  0  0  0  0  0  0  0
    8.3924    5.4679    0.0000 O   0  0  0  0  0  0  0  0  0  0  0  0
  1  2  1  0
  2  3  1  0
  3  4  1  0
  4  5  1  0
  5  6  1  0
  5 37  1  0
  6  7  1  0
  7  8  1  0
  8  9  1  0
  8 11  1  0
  9 10  1  0
 11 12  1  0
 12 13  1  0
 12 35  1  0
 13 14  1  0
 14 15  1  0
 15 16  1  0
 15 17  1  0
 17 18  1  0
 17 19  1  0
 19 20  1  0
 20 21  1  0
 20 22  1  0
 22 23  1  0
 22 14  1  0
 23 24  1  0
 24 25  1  0
 25 26  1  0
 26 27  1  0
 26 29  1  0
 27 28  1  0
 29 30  1  0
 29 31  1  0
 31 32  1  0
 31 33  1  0
 33 34  1  0
 33 24  1  0
 35 36  1  0
 35  7  1  0
 37 38  1  0
 37 39  1  0
 39 40  1  0
 39 41  1  0
 41 42  1  0
 41  3  1  0
M  END
>  <group_A>  (171) 
1

>  <group_B>  (171) 
0

>  <group_C>  (171) 
0

>  <group_D>  (171) 
0

>  <group_G>  (171) 
0

>  <group_H>  (171) 
0

>  <group_J>  (171) 
0

>  <group_L>  (171) 
0

>  <group_M>  (171) 
0

>  <group_N>  (171) 
0

>  <group_P>  (171) 
0

>  <group_R>  (171) 
0

>  <group_S>  (171) 
0

>  <group_V>  (171) 
0

$$$$

     RDKit          2D

 23 25  0  0  0  0  0  0  0  0999 V2000
    5.1962    1.0000    0.0000 C   0  0  0  0  0  0  0  0  0  0  0  0
    4.3301    1.5000    0.0000 N   0  0  0  0  0  0  0  0  0  0  0  0
    3.4641    1.0000    0.0000 C   0  0  0  0  0  0  0  0  0  0  0  0
    3.4641   -0.0000    0.0000 C   0  0  0  0  0  0  0  0  0  0  0  0
    4.3301   -0.5000    0.0000 O   0  0  0  0  0  0  0  0  0  0  0  0
    2.5981   -0.5000    0.0000 C   0  0  0  0  0  0  0  0  0  0  0  0
    2.5981   -1.5000    0.0000 N   0  0  0  0  0  0  0  0  0  0  0  0
    1.7321   -2.0000    0.0000 C   0  0  0  0  0  0  0  0  0  0  0  0
    1.7321   -0.0000    0.0000 C   0  0  0  0  0  0  0  0  0  0  0  0
    0.8660   -0.5000    0.0000 O   0  0  0  0  0  0  0  0  0  0  0  0
   -0.0000   -0.0000    0.0000 C   0  0  0  0  0  0  0  0  0  0  0  0
    0.0000   -1.0000    0.0000 O   0  0  0  0  0  0  0  0  0  0  0  0
   -0.8660   -0.5000    0.0000 C   0  0  0  0  0  0  0  0  0  0  0  0
   -0.8660   -1.5000    0.0000 O   0  0  0  0  0  0  0  0  0  0  0  0
   -1.7321   -0.0000    0.0000 C   0  0  0  0  0  0  0  0  0  0  0  0
   -1.7321    1.0000    0.0000 C   0  0  0  0  0  0  0  0  0  0  0  0
   -2.5981    1.5000    0.0000 C   0  0  0  0  0  0  0  0  0  0  0  0
   -0.8660    1.5000    0.0000 O   0  0  0  0  0  0  0  0  0  0  0  0
   -0.0000    1.0000    0.0000 C   0  0  0  0  0  0  0  0  0  0  0  0
    0.8660    1.5000    0.0000 O   0  0  0  0  0  0  0  0  0  0  0  0
    1.7321    1.0000    0.0000 C   0  0  0  0  0  0  0  0  0  0  0  0
    2.5981    1.5000    0.0000 C   0  0  0  0  0  0  0  0  0  0  0  0
    2.5981    2.5000    0.0000 O   0  0  0  0  0  0  0  0  0  0  0  0
  1  2  1  0
  2  3  1  0
  3  4  1  0
  4  5  1  0
  4  6  1  0
  6  7  1  0
  6  9  1  0
  7  8  1  0
  9 10  1  0
 10 11  1  0
 11 12  1  0
 11 13  1  0
 13 14  2  0
 13 15  1  0
 15 16  1  0
 16 17  1  0
 16 18  1  0
 18 19  1  0
 19 20  1  0
 19 11  1  0
 20 21  1  0
 21 22  1  0
 21  9  1  0
 22 23  1  0
 22  3  1  0
M  END
>  <group_A>  (172) 
0

>  <group_B>  (172) 
0

>  <group_C>  (172) 
0

>  <group_D>  (172) 
0

>  <group_G>  (172) 
0

>  <group_H>  (172) 
0

>  <group_J>  (172) 
1

>  <group_L>  (172) 
0

>  <group_M>  (172) 
0

>  <group_N>  (172) 
0

>  <group_P>  (172) 
0

>  <group_R>  (172) 
0

>  <group_S>  (172) 
0

>  <group_V>  (172) 
0

$$$$

     RDKit          2D

 40 42  0  0  0  0  0  0  0  0999 V2000
    5.5366    0.3061    0.0000 C   0  0  0  0  0  0  0  0  0  0  0  0
    4.6706   -0.1939    0.0000 N   0  0  0  0  0  0  0  0  0  0  0  0
    4.6706   -1.1939    0.0000 C   0  0  0  0  0  0  0  0  0  0  0  0
    3.8046   -1.6939    0.0000 C   0  0  0  0  0  0  0  0  0  0  0  0
    2.9385   -1.1939    0.0000 O   0  0  0  0  0  0  0  0  0  0  0  0
    2.0725   -1.6939    0.0000 C   0  0  0  0  0  0  0  0  0  0  0  0
    1.1590   -1.2872    0.0000 C   0  0  0  0  0  0  0  0  0  0  0  0
    0.9511   -0.3090    0.0000 O   0  0  0  0  0  0  0  0  0  0  0  0
    0.0000   -0.0000    0.0000 C   0  0  0  0  0  0  0  0  0  0  0  0
   -0.7431   -0.6691    0.0000 C   0  0  0  0  0  0  0  0  0  0  0  0
   -0.5352   -1.6473    0.0000 O   0  0  0  0  0  0  0  0  0  0  0  0
   -1.6942   -0.3601    0.0000 C   0  0  0  0  0  0  0  0  0  0  0  0
   -2.4373   -1.0292    0.0000 O   0  0  0  0  0  0  0  0  0  0  0  0
   -1.9021    0.6180    0.0000 C   0  0  0  0  0  0  0  0  0  0  0  0
   -2.8532    0.9271    0.0000 N   0  0  0  0  0  0  0  0  0  0  0  0
   -3.0611    1.9052    0.0000 C   0  0  0  0  0  0  0  0  0  0  0  0
   -2.3179    2.5743    0.0000 N   0  0  0  0  0  0  0  0  0  0  0  0
   -4.0121    2.2142    0.0000 N   0  0  0  0  0  0  0  0  0  0  0  0
   -1.1590    1.2872    0.0000 C   0  0  0  0  0  0  0  0  0  0  0  0
   -1.3669    2.2653    0.0000 O   0  0  0  0  0  0  0  0  0  0  0  0
   -0.2079    0.9781    0.0000 C   0  0  0  0  0  0  0  0  0  0  0  0
    0.5352    1.6473    0.0000 N   0  0  0  0  0  0  0  0  0  0  0  0
    0.3273    2.6254    0.0000 C   0  0  0  0  0  0  0  0  0  0  0  0
    1.0705    3.2946    0.0000 N   0  0  0  0  0  0  0  0  0  0  0  0
   -0.6237    2.9344    0.0000 N   0  0  0  0  0  0  0  0  0  0  0  0
    0.4898   -2.0303    0.0000 O   0  0  0  0  0  0  0  0  0  0  0  0
    0.9898   -2.8963    0.0000 C   0  0  0  0  0  0  0  0  0  0  0  0
    0.5831   -3.8099    0.0000 C   0  0  0  0  0  0  0  0  0  0  0  0
    1.9680   -2.6884    0.0000 C   0  0  0  0  0  0  0  0  0  0  0  0
    2.9461   -2.8963    0.0000 O   0  0  0  0  0  0  0  0  0  0  0  0
    2.2770   -3.6395    0.0000 C   0  0  0  0  0  0  0  0  0  0  0  0
    3.2551   -3.8474    0.0000 O   0  0  0  0  0  0  0  0  0  0  0  0
    3.8046   -2.6939    0.0000 O   0  0  0  0  0  0  0  0  0  0  0  0
    4.6706   -3.1939    0.0000 C   0  0  0  0  0  0  0  0  0  0  0  0
    4.6706   -4.1939    0.0000 C   0  0  0  0  0  0  0  0  0  0  0  0
    5.5366   -4.6939    0.0000 O   0  0  0  0  0  0  0  0  0  0  0  0
    5.5366   -2.6939    0.0000 C   0  0  0  0  0  0  0  0  0  0  0  0
    6.4026   -3.1939    0.0000 O   0  0  0  0  0  0  0  0  0  0  0  0
    5.5366   -1.6939    0.0000 C   0  0  0  0  0  0  0  0  0  0  0  0
    6.4026   -1.1939    0.0000 O   0  0  0  0  0  0  0  0  0  0  0  0
  1  2  1  0
  2  3  1  0
  3  4  1  0
  4  5  1  0
  4 33  1  0
  5  6  1  0
  6  7  1  0
  7  8  1  0
  7 26  1  0
  8  9  1  0
  9 10  1  0
 10 11  1  0
 10 12  1  0
 12 13  1  0
 12 14  1  0
 14 15  1  0
 14 19  1  0
 15 16  1  0
 16 17  2  0
 16 18  1  0
 19 20  1  0
 19 21  1  0
 21 22  1  0
 21  9  1  0
 22 23  1  0
 23 24  2  0
 23 25  1  0
 26 27  1  0
 27 28  1  0
 27 29  1  0
 29 30  1  0
 29 31  1  0
 29  6  1  0
 31 32  2  0
 33 34  1  0
 34 35  1  0
 34 37  1  0
 35 36  1  0
 37 38  1  0
 37 39  1  0
 39 40  1  0
 39  3  1  0
M  END
>  <group_A>  (173) 
1

>  <group_B>  (173) 
0

>  <group_C>  (173) 
0

>  <group_D>  (173) 
0

>  <group_G>  (173) 
0

>  <group_H>  (173) 
0

>  <group_J>  (173) 
1

>  <group_L>  (173) 
0

>  <group_M>  (173) 
0

>  <group_N>  (173) 
0

>  <group_P>  (173) 
0

>  <group_R>  (173) 
0

>  <group_S>  (173) 
0

>  <group_V>  (173) 
0

$$$$

     RDKit          2D

 22 22  0  0  0  0  0  0  0  0999 V2000
    0.0000   -3.0000    0.0000 C   0  0  0  0  0  0  0  0  0  0  0  0
   -0.8660   -2.5000    0.0000 C   0  0  0  0  0  0  0  0  0  0  0  0
   -0.8660   -1.5000    0.0000 C   0  0  0  0  0  0  0  0  0  0  0  0
    0.0000   -1.0000    0.0000 C   0  0  0  0  0  0  0  0  0  0  0  0
   -0.0000   -0.0000    0.0000 C   0  0  0  0  0  0  0  0  0  0  0  0
   -0.8660    0.5000    0.0000 C   0  0  0  0  0  0  0  0  0  0  0  0
   -1.7321   -0.0000    0.0000 C   0  0  0  0  0  0  0  0  0  0  0  0
   -0.8660    1.5000    0.0000 C   0  0  0  0  0  0  0  0  0  0  0  0
   -0.0000    2.0000    0.0000 C   0  0  0  0  0  0  0  0  0  0  0  0
    0.8660    1.5000    0.0000 C   0  0  0  0  0  0  0  0  0  0  0  0
    0.8660    0.5000    0.0000 C   0  0  0  0  0  0  0  0  0  0  0  0
    1.3660   -0.3660    0.0000 C   0  0  0  0  0  0  0  0  0  0  0  0
    1.8660    0.5000    0.0000 C   0  0  0  0  0  0  0  0  0  0  0  0
   -1.7321   -3.0000    0.0000 C   0  0  0  0  0  0  0  0  0  0  0  0
   -1.7321   -4.0000    0.0000 C   0  0  0  0  0  0  0  0  0  0  0  0
   -2.5981   -4.5000    0.0000 C   0  0  0  0  0  0  0  0  0  0  0  0
   -2.5981   -5.5000    0.0000 C   0  0  0  0  0  0  0  0  0  0  0  0
   -3.4641   -6.0000    0.0000 C   0  0  0  0  0  0  0  0  0  0  0  0
   -1.7321   -6.0000    0.0000 C   0  0  0  0  0  0  0  0  0  0  0  0
   -1.7321   -7.0000    0.0000 C   0  0  0  0  0  0  0  0  0  0  0  0
   -2.5981   -7.5000    0.0000 O   0  0  0  0  0  0  0  0  0  0  0  0
   -0.8660   -7.5000    0.0000 O   0  0  0  0  0  0  0  0  0  0  0  0
  1  2  1  0
  2  3  1  0
  2 14  2  3
  3  4  2  3
  4  5  1  0
  5  6  2  0
  6  7  1  0
  6  8  1  0
  8  9  1  0
  9 10  1  0
 10 11  1  0
 11 12  1  0
 11 13  1  0
 11  5  1  0
 14 15  1  0
 15 16  2  3
 16 17  1  0
 17 18  1  0
 17 19  2  3
 19 20  1  0
 20 21  2  0
 20 22  1  0
M  END
>  <group_A>  (174) 
1

>  <group_B>  (174) 
0

>  <group_C>  (174) 
0

>  <group_D>  (174) 
1

>  <group_G>  (174) 
0

>  <group_H>  (174) 
0

>  <group_J>  (174) 
0

>  <group_L>  (174) 
1

>  <group_M>  (174) 
0

>  <group_N>  (174) 
0

>  <group_P>  (174) 
0

>  <group_R>  (174) 
0

>  <group_S>  (174) 
0

>  <group_V>  (174) 
0

$$$$

     RDKit          2D

 25 27  0  0  0  0  0  0  0  0999 V2000
   -5.1962    0.0000    0.0000 C   0  0  0  0  0  0  0  0  0  0  0  0
   -5.1962   -1.0000    0.0000 N   0  0  0  0  0  0  0  0  0  0  0  0
   -4.3301   -1.5000    0.0000 C   0  0  0  0  0  0  0  0  0  0  0  0
   -4.3301   -2.5000    0.0000 C   0  0  0  0  0  0  0  0  0  0  0  0
   -3.4641   -3.0000    0.0000 O   0  0  0  0  0  0  0  0  0  0  0  0
   -2.5981   -2.5000    0.0000 C   0  0  0  0  0  0  0  0  0  0  0  0
   -2.5981   -1.5000    0.0000 C   0  0  0  0  0  0  0  0  0  0  0  0
   -1.7321   -1.0000    0.0000 C   0  0  0  0  0  0  0  0  0  0  0  0
   -0.8660   -1.5000    0.0000 C   0  0  0  0  0  0  0  0  0  0  0  0
   -0.0000   -1.0000    0.0000 C   0  0  0  0  0  0  0  0  0  0  0  0
    0.0000    0.0000    0.0000 C   0  0  0  0  0  0  0  0  0  0  0  0
   -0.8090    0.5878    0.0000 S   0  0  0  0  0  0  0  0  0  0  0  0
   -0.5000    1.5388    0.0000 C   0  0  0  0  0  0  0  0  0  0  0  0
   -1.0878    2.3479    0.0000 O   0  0  0  0  0  0  0  0  0  0  0  0
    0.5000    1.5388    0.0000 N   0  0  0  0  0  0  0  0  0  0  0  0
    0.8090    0.5878    0.0000 C   0  0  0  0  0  0  0  0  0  0  0  0
    1.7601    0.2788    0.0000 O   0  0  0  0  0  0  0  0  0  0  0  0
   -0.8660   -2.5000    0.0000 C   0  0  0  0  0  0  0  0  0  0  0  0
   -1.7321   -3.0000    0.0000 C   0  0  0  0  0  0  0  0  0  0  0  0
   -6.0622   -1.5000    0.0000 C   0  0  0  0  0  0  0  0  0  0  0  0
   -6.0622   -2.5000    0.0000 C   0  0  0  0  0  0  0  0  0  0  0  0
   -6.9282   -3.0000    0.0000 C   0  0  0  0  0  0  0  0  0  0  0  0
   -7.7942   -2.5000    0.0000 C   0  0  0  0  0  0  0  0  0  0  0  0
   -7.7942   -1.5000    0.0000 C   0  0  0  0  0  0  0  0  0  0  0  0
   -6.9282   -1.0000    0.0000 N   0  0  0  0  0  0  0  0  0  0  0  0
  1  2  1  0
  2  3  1  0
  2 20  1  0
  3  4  1  0
  4  5  1  0
  5  6  1  0
  6  7  2  0
  7  8  1  0
  8  9  2  0
  9 10  1  0
  9 18  1  0
 10 11  1  0
 11 12  1  0
 12 13  1  0
 13 14  2  0
 13 15  1  0
 15 16  1  0
 16 17  2  0
 16 11  1  0
 18 19  2  0
 19  6  1  0
 20 21  2  0
 21 22  1  0
 22 23  2  0
 23 24  1  0
 24 25  2  0
 25 20  1  0
M  END
>  <group_A>  (175) 
1

>  <group_B>  (175) 
0

>  <group_C>  (175) 
0

>  <group_D>  (175) 
1

>  <group_G>  (175) 
0

>  <group_H>  (175) 
0

>  <group_J>  (175) 
0

>  <group_L>  (175) 
1

>  <group_M>  (175) 
0

>  <group_N>  (175) 
0

>  <group_P>  (175) 
0

>  <group_R>  (175) 
0

>  <group_S>  (175) 
0

>  <group_V>  (175) 
0

$$$$

     RDKit          2D

 27 29  0  0  0  0  0  0  0  0999 V2000
   -7.9690    2.1583    0.0000 N   0  0  0  0  0  0  0  0  0  0  0  0
   -7.3812    1.3493    0.0000 C   0  0  0  0  0  0  0  0  0  0  0  0
   -7.7880    0.4357    0.0000 N   0  0  0  0  0  0  0  0  0  0  0  0
   -7.2002   -0.3733    0.0000 C   0  0  0  0  0  0  0  0  0  0  0  0
   -6.2057   -0.2688    0.0000 N   0  0  0  0  0  0  0  0  0  0  0  0
   -5.7989    0.6448    0.0000 C   0  0  0  0  0  0  0  0  0  0  0  0
   -6.3867    1.4538    0.0000 C   0  0  0  0  0  0  0  0  0  0  0  0
   -5.7989    2.2628    0.0000 N   0  0  0  0  0  0  0  0  0  0  0  0
   -4.8479    1.9538    0.0000 C   0  0  0  0  0  0  0  0  0  0  0  0
   -4.8479    0.9538    0.0000 N   0  0  0  0  0  0  0  0  0  0  0  0
   -4.0388    0.3660    0.0000 C   0  0  0  0  0  0  0  0  0  0  0  0
   -3.0878    0.6750    0.0000 O   0  0  0  0  0  0  0  0  0  0  0  0
   -2.5000   -0.1340    0.0000 C   0  0  0  0  0  0  0  0  0  0  0  0
   -1.5000   -0.1340    0.0000 C   0  0  0  0  0  0  0  0  0  0  0  0
   -1.0000   -1.0000    0.0000 O   0  0  0  0  0  0  0  0  0  0  0  0
    0.0000   -1.0000    0.0000 P   0  0  0  0  0  0  0  0  0  0  0  0
    0.0000   -2.0000    0.0000 O   0  0  0  0  0  0  0  0  0  0  0  0
    1.0000   -1.0000    0.0000 O   0  0  0  0  0  0  0  0  0  0  0  0
    0.0000    0.0000    0.0000 O   0  0  0  0  0  0  0  0  0  0  0  0
   -3.0878   -0.9430    0.0000 C   0  0  0  0  0  0  0  0  0  0  0  0
   -2.7788   -1.8940    0.0000 O   0  0  0  0  0  0  0  0  0  0  0  0
   -1.8006   -2.1020    0.0000 P   0  0  0  0  0  0  0  0  0  0  0  0
   -2.0085   -3.0801    0.0000 O   0  0  0  0  0  0  0  0  0  0  0  0
   -0.8225   -2.3099    0.0000 O   0  0  0  0  0  0  0  0  0  0  0  0
   -1.5927   -1.1238    0.0000 O   0  0  0  0  0  0  0  0  0  0  0  0
   -4.0388   -0.6340    0.0000 C   0  0  0  0  0  0  0  0  0  0  0  0
   -4.8479   -1.2218    0.0000 O   0  0  0  0  0  0  0  0  0  0  0  0
  1  2  1  0
  2  3  2  0
  3  4  1  0
  4  5  2  0
  5  6  1  0
  6  7  2  0
  7  8  1  0
  7  2  1  0
  8  9  2  0
  9 10  1  0
 10 11  1  0
 10  6  1  0
 11 12  1  0
 12 13  1  0
 13 14  1  0
 13 20  1  0
 14 15  1  0
 15 16  1  0
 16 17  2  0
 16 18  1  0
 16 19  1  0
 20 21  1  0
 20 26  1  0
 21 22  1  0
 22 23  2  0
 22 24  1  0
 22 25  1  0
 26 27  1  0
 26 11  1  0
M  END
>  <group_A>  (176) 
1

>  <group_B>  (176) 
1

>  <group_C>  (176) 
1

>  <group_D>  (176) 
0

>  <group_G>  (176) 
1

>  <group_H>  (176) 
0

>  <group_J>  (176) 
0

>  <group_L>  (176) 
0

>  <group_M>  (176) 
0

>  <group_N>  (176) 
0

>  <group_P>  (176) 
1

>  <group_R>  (176) 
0

>  <group_S>  (176) 
1

>  <group_V>  (176) 
1

$$$$

     RDKit          2D

  1  0  0  0  0  0  0  0  0  0999 V2000
    1.0000    0.0000    0.0000 Hg  0  0  0  0  0 15  0  0  0  0  0  0
M  CHG  1   1   2
M  END
>  <group_A>  (177) 
1

>  <group_B>  (177) 
1

>  <group_C>  (177) 
1

>  <group_D>  (177) 
0

>  <group_G>  (177) 
1

>  <group_H>  (177) 
0

>  <group_J>  (177) 
0

>  <group_L>  (177) 
1

>  <group_M>  (177) 
0

>  <group_N>  (177) 
0

>  <group_P>  (177) 
0

>  <group_R>  (177) 
0

>  <group_S>  (177) 
1

>  <group_V>  (177) 
1

$$$$

     RDKit          2D

 39 41  0  0  0  0  0  0  0  0999 V2000
    4.5000   -0.1340    0.0000 C   0  0  0  0  0  0  0  0  0  0  0  0
    4.0000   -1.0000    0.0000 C   0  0  0  0  0  0  0  0  0  0  0  0
    4.5000   -1.8660    0.0000 O   0  0  0  0  0  0  0  0  0  0  0  0
    3.0000   -1.0000    0.0000 N   0  0  0  0  0  0  0  0  0  0  0  0
    2.5000   -1.8660    0.0000 C   0  0  0  0  0  0  0  0  0  0  0  0
    1.5000   -1.8660    0.0000 C   0  0  0  0  0  0  0  0  0  0  0  0
    1.0000   -1.0000    0.0000 O   0  0  0  0  0  0  0  0  0  0  0  0
   -0.0000   -1.0000    0.0000 P   0  0  0  0  0  0  0  0  0  0  0  0
   -0.0000   -2.0000    0.0000 O   0  0  0  0  0  0  0  0  0  0  0  0
   -1.0000   -1.0000    0.0000 O   0  0  0  0  0  0  0  0  0  0  0  0
   -0.0000   -0.0000    0.0000 O   0  0  0  0  0  0  0  0  0  0  0  0
   -0.0000    1.0000    0.0000 P   0  0  0  0  0  0  0  0  0  0  0  0
    1.0000    1.0000    0.0000 O   0  0  0  0  0  0  0  0  0  0  0  0
    0.0000    2.0000    0.0000 O   0  0  0  0  0  0  0  0  0  0  0  0
   -1.0000    1.0000    0.0000 O   0  0  0  0  0  0  0  0  0  0  0  0
   -1.5000    0.1340    0.0000 C   0  0  0  0  0  0  0  0  0  0  0  0
   -2.5000    0.1340    0.0000 C   0  0  0  0  0  0  0  0  0  0  0  0
   -3.0878   -0.6750    0.0000 O   0  0  0  0  0  0  0  0  0  0  0  0
   -4.0388   -0.3660    0.0000 C   0  0  0  0  0  0  0  0  0  0  0  0
   -4.8479   -0.9538    0.0000 N   0  0  0  0  0  0  0  0  0  0  0  0
   -4.7433   -1.9483    0.0000 C   0  0  0  0  0  0  0  0  0  0  0  0
   -5.5523   -2.5361    0.0000 C   0  0  0  0  0  0  0  0  0  0  0  0
   -6.4659   -2.1294    0.0000 C   0  0  0  0  0  0  0  0  0  0  0  0
   -7.2749   -2.7172    0.0000 O   0  0  0  0  0  0  0  0  0  0  0  0
   -6.5704   -1.1349    0.0000 N   0  0  0  0  0  0  0  0  0  0  0  0
   -5.7614   -0.5471    0.0000 C   0  0  0  0  0  0  0  0  0  0  0  0
   -5.8659    0.4474    0.0000 O   0  0  0  0  0  0  0  0  0  0  0  0
   -4.0388    0.6340    0.0000 C   0  0  0  0  0  0  0  0  0  0  0  0
   -4.8479    1.2218    0.0000 O   0  0  0  0  0  0  0  0  0  0  0  0
   -3.0878    0.9430    0.0000 C   0  0  0  0  0  0  0  0  0  0  0  0
   -2.7788    1.8940    0.0000 O   0  0  0  0  0  0  0  0  0  0  0  0
    1.0000   -2.7321    0.0000 O   0  0  0  0  0  0  0  0  0  0  0  0
    1.5000   -3.5981    0.0000 C   0  0  0  0  0  0  0  0  0  0  0  0
    1.0000   -4.4641    0.0000 C   0  0  0  0  0  0  0  0  0  0  0  0
    1.5000   -5.3301    0.0000 O   0  0  0  0  0  0  0  0  0  0  0  0
    2.5000   -3.5981    0.0000 C   0  0  0  0  0  0  0  0  0  0  0  0
    3.0000   -4.4641    0.0000 O   0  0  0  0  0  0  0  0  0  0  0  0
    3.0000   -2.7321    0.0000 C   0  0  0  0  0  0  0  0  0  0  0  0
    4.0000   -2.7321    0.0000 O   0  0  0  0  0  0  0  0  0  0  0  0
  1  2  1  0
  2  3  2  0
  2  4  1  0
  4  5  1  0
  5  6  1  0
  6  7  1  0
  6 32  1  0
  7  8  1  0
  8  9  2  0
  8 10  1  0
  8 11  1  0
 11 12  1  0
 12 13  2  0
 12 14  1  0
 12 15  1  0
 15 16  1  0
 16 17  1  0
 17 18  1  0
 18 19  1  0
 19 20  1  0
 19 28  1  0
 20 21  1  0
 21 22  2  0
 22 23  1  0
 23 24  2  0
 23 25  1  0
 25 26  1  0
 26 27  2  0
 26 20  1  0
 28 29  1  0
 28 30  1  0
 30 31  1  0
 30 17  1  0
 32 33  1  0
 33 34  1  0
 33 36  1  0
 34 35  1  0
 36 37  1  0
 36 38  1  0
 38 39  1  0
 38  5  1  0
M  END
>  <group_A>  (178) 
1

>  <group_B>  (178) 
0

>  <group_C>  (178) 
0

>  <group_D>  (178) 
0

>  <group_G>  (178) 
1

>  <group_H>  (178) 
0

>  <group_J>  (178) 
0

>  <group_L>  (178) 
0

>  <group_M>  (178) 
0

>  <group_N>  (178) 
0

>  <group_P>  (178) 
0

>  <group_R>  (178) 
0

>  <group_S>  (178) 
1

>  <group_V>  (178) 
0

$$$$

     RDKit          2D

 13 13  0  0  0  0  0  0  0  0999 V2000
    0.0000   -3.0000    0.0000 C   0  0  0  0  0  0  0  0  0  0  0  0
    0.8660   -2.5000    0.0000 C   0  0  0  0  0  0  0  0  0  0  0  0
    1.7321   -3.0000    0.0000 N   0  0  0  0  0  0  0  0  0  0  0  0
    0.8660   -1.5000    0.0000 N   0  0  0  0  0  0  0  0  0  0  0  0
   -0.0000   -1.0000    0.0000 C   0  0  0  0  0  0  0  0  0  0  0  0
    0.0000    0.0000    0.0000 C   0  0  0  0  0  0  0  0  0  0  0  0
   -0.8660    0.5000    0.0000 C   0  0  0  0  0  0  0  0  0  0  0  0
   -0.8660    1.5000    0.0000 C   0  0  0  0  0  0  0  0  0  0  0  0
    0.0000    2.0000    0.0000 C   0  0  0  0  0  0  0  0  0  0  0  0
    0.8660    1.5000    0.0000 C   0  0  0  0  0  0  0  0  0  0  0  0
    1.7321    2.0000    0.0000 C   0  0  0  0  0  0  0  0  0  0  0  0
    1.7321    3.0000    0.0000 N   0  0  0  0  0  0  0  0  0  0  0  0
    0.8660    0.5000    0.0000 C   0  0  0  0  0  0  0  0  0  0  0  0
  1  2  1  0
  2  3  2  0
  2  4  1  0
  4  5  1  0
  5  6  1  0
  6  7  2  0
  7  8  1  0
  8  9  2  0
  9 10  1  0
 10 11  1  0
 10 13  2  0
 11 12  1  0
 13  6  1  0
M  END
>  <group_A>  (179) 
1

>  <group_B>  (179) 
0

>  <group_C>  (179) 
0

>  <group_D>  (179) 
0

>  <group_G>  (179) 
0

>  <group_H>  (179) 
0

>  <group_J>  (179) 
0

>  <group_L>  (179) 
0

>  <group_M>  (179) 
0

>  <group_N>  (179) 
0

>  <group_P>  (179) 
0

>  <group_R>  (179) 
0

>  <group_S>  (179) 
0

>  <group_V>  (179) 
0

$$$$

     RDKit          2D

  9  8  0  0  0  0  0  0  0  0999 V2000
    0.8660   -0.5000    0.0000 O   0  0  0  0  0  0  0  0  0  0  0  0
    1.7321   -0.0000    0.0000 C   0  0  0  0  0  0  0  0  0  0  0  0
    2.5981   -0.5000    0.0000 O   0  0  0  0  0  0  0  0  0  0  0  0
    1.7321    1.0000    0.0000 C   0  0  0  0  0  0  0  0  0  0  0  0
    0.8660    1.5000    0.0000 C   0  0  0  0  0  0  0  0  0  0  0  0
    0.8660    2.5000    0.0000 O   0  0  0  0  0  0  0  0  0  0  0  0
   -0.0000    1.0000    0.0000 C   0  0  0  0  0  0  0  0  0  0  0  0
   -0.8660    1.5000    0.0000 O   0  0  0  0  0  0  0  0  0  0  0  0
    0.0000    0.0000    0.0000 O   0  0  0  0  0  0  0  0  0  0  0  0
  1  2  2  0
  2  3  1  0
  2  4  1  0
  4  5  1  0
  5  6  1  0
  5  7  1  0
  7  8  2  0
  7  9  1  0
M  END
>  <group_A>  (180) 
1

>  <group_B>  (180) 
0

>  <group_C>  (180) 
0

>  <group_D>  (180) 
0

>  <group_G>  (180) 
1

>  <group_H>  (180) 
0

>  <group_J>  (180) 
0

>  <group_L>  (180) 
0

>  <group_M>  (180) 
0

>  <group_N>  (180) 
0

>  <group_P>  (180) 
0

>  <group_R>  (180) 
0

>  <group_S>  (180) 
1

>  <group_V>  (180) 
0

$$$$

     RDKit          2D

  6  6  0  0  0  0  0  0  0  0999 V2000
    0.0000    0.0000    0.0000 C   0  0  0  0  0  0  0  0  0  0  0  0
   -0.8660    0.5000    0.0000 C   0  0  0  0  0  0  0  0  0  0  0  0
   -0.8660    1.5000    0.0000 O   0  0  0  0  0  0  0  0  0  0  0  0
   -0.0000    2.0000    0.0000 C   0  0  0  0  0  0  0  0  0  0  0  0
    0.8660    1.5000    0.0000 C   0  0  0  0  0  0  0  0  0  0  0  0
    0.8660    0.5000    0.0000 O   0  0  0  0  0  0  0  0  0  0  0  0
  1  2  1  0
  2  3  1  0
  3  4  1  0
  4  5  1  0
  5  6  1  0
  6  1  1  0
M  END
>  <group_A>  (181) 
1

>  <group_B>  (181) 
1

>  <group_C>  (181) 
1

>  <group_D>  (181) 
0

>  <group_G>  (181) 
1

>  <group_H>  (181) 
0

>  <group_J>  (181) 
0

>  <group_L>  (181) 
0

>  <group_M>  (181) 
0

>  <group_N>  (181) 
0

>  <group_P>  (181) 
0

>  <group_R>  (181) 
0

>  <group_S>  (181) 
1

>  <group_V>  (181) 
1

$$$$

     RDKit          2D

  3  2  0  0  0  0  0  0  0  0999 V2000
    1.7321   -0.0000    0.0000 C   0  0  0  0  0  0  0  0  0  0  0  0
    0.8660    0.5000    0.0000 C   0  0  0  0  0  0  0  0  0  0  0  0
   -0.0000   -0.0000    0.0000 O   0  0  0  0  0  0  0  0  0  0  0  0
  1  2  1  0
  2  3  2  0
M  END
>  <group_A>  (182) 
1

>  <group_B>  (182) 
1

>  <group_C>  (182) 
1

>  <group_D>  (182) 
1

>  <group_G>  (182) 
1

>  <group_H>  (182) 
0

>  <group_J>  (182) 
1

>  <group_L>  (182) 
0

>  <group_M>  (182) 
1

>  <group_N>  (182) 
1

>  <group_P>  (182) 
0

>  <group_R>  (182) 
0

>  <group_S>  (182) 
1

>  <group_V>  (182) 
1

$$$$

     RDKit          2D

 20 20  0  0  0  0  0  0  0  0999 V2000
   -4.3301   -5.5000    0.0000 C   0  0  0  0  0  0  0  0  0  0  0  0
   -3.4641   -6.0000    0.0000 C   0  0  0  0  0  0  0  0  0  0  0  0
   -2.5981   -5.5000    0.0000 C   0  0  0  0  0  0  0  0  0  0  0  0
   -2.5981   -4.5000    0.0000 C   0  0  0  0  0  0  0  0  0  0  0  0
   -1.7321   -4.0000    0.0000 C   0  0  0  0  0  0  0  0  0  0  0  0
   -1.7321   -3.0000    0.0000 C   0  0  0  0  0  0  0  0  0  0  0  0
   -0.8660   -2.5000    0.0000 C   0  0  0  0  0  0  0  0  0  0  0  0
   -0.8660   -1.5000    0.0000 C   0  0  0  0  0  0  0  0  0  0  0  0
   -0.0000   -1.0000    0.0000 O   0  0  0  0  0  0  0  0  0  0  0  0
    0.0000   -0.0000    0.0000 C   0  0  0  0  0  0  0  0  0  0  0  0
   -0.8660    0.5000    0.0000 O   0  0  0  0  0  0  0  0  0  0  0  0
   -0.8660    1.5000    0.0000 C   0  0  0  0  0  0  0  0  0  0  0  0
   -1.7321    2.0000    0.0000 C   0  0  0  0  0  0  0  0  0  0  0  0
   -1.7321    3.0000    0.0000 O   0  0  0  0  0  0  0  0  0  0  0  0
    0.0000    2.0000    0.0000 C   0  0  0  0  0  0  0  0  0  0  0  0
    0.0000    3.0000    0.0000 O   0  0  0  0  0  0  0  0  0  0  0  0
    0.8660    1.5000    0.0000 C   0  0  0  0  0  0  0  0  0  0  0  0
    1.7321    2.0000    0.0000 O   0  0  0  0  0  0  0  0  0  0  0  0
    0.8660    0.5000    0.0000 C   0  0  0  0  0  0  0  0  0  0  0  0
    1.7321   -0.0000    0.0000 O   0  0  0  0  0  0  0  0  0  0  0  0
  1  2  1  0
  2  3  1  0
  3  4  1  0
  4  5  1  0
  5  6  1  0
  6  7  1  0
  7  8  1  0
  8  9  1  0
  9 10  1  0
 10 11  1  0
 11 12  1  0
 12 13  1  0
 12 15  1  0
 13 14  1  0
 15 16  1  0
 15 17  1  0
 17 18  1  0
 17 19  1  0
 19 20  1  0
 19 10  1  0
M  END
>  <group_A>  (183) 
1

>  <group_B>  (183) 
1

>  <group_C>  (183) 
1

>  <group_D>  (183) 
1

>  <group_G>  (183) 
1

>  <group_H>  (183) 
0

>  <group_J>  (183) 
0

>  <group_L>  (183) 
1

>  <group_M>  (183) 
1

>  <group_N>  (183) 
1

>  <group_P>  (183) 
0

>  <group_R>  (183) 
1

>  <group_S>  (183) 
1

>  <group_V>  (183) 
1

$$$$

     RDKit          2D

  4  3  0  0  0  0  0  0  0  0999 V2000
    2.0000    0.0000    0.0000 O   0  0  0  0  0  0  0  0  0  0  0  0
    1.5000    0.8660    0.0000 C   0  0  0  0  0  0  0  0  0  0  0  0
    0.5000    0.8660    0.0000 C   0  0  0  0  0  0  0  0  0  0  0  0
   -0.0000   -0.0000    0.0000 S   0  0  0  0  0  0  0  0  0  0  0  0
  1  2  1  0
  2  3  1  0
  3  4  1  0
M  END
>  <group_A>  (184) 
1

>  <group_B>  (184) 
1

>  <group_C>  (184) 
1

>  <group_D>  (184) 
0

>  <group_G>  (184) 
1

>  <group_H>  (184) 
0

>  <group_J>  (184) 
1

>  <group_L>  (184) 
1

>  <group_M>  (184) 
1

>  <group_N>  (184) 
1

>  <group_P>  (184) 
0

>  <group_R>  (184) 
1

>  <group_S>  (184) 
1

>  <group_V>  (184) 
1

$$$$

     RDKit          2D

  8  7  0  0  0  0  0  0  0  0999 V2000
    1.7321   -1.0000    0.0000 N   0  0  0  0  0  0  0  0  0  0  0  0
    1.7321   -0.0000    0.0000 C   0  0  0  0  0  0  0  0  0  0  0  0
    2.5981    0.5000    0.0000 C   0  0  0  0  0  0  0  0  0  0  0  0
    2.5981    1.5000    0.0000 S   0  0  0  0  0  0  0  0  0  0  0  0
    3.4641    2.0000    0.0000 O   0  0  0  0  0  0  0  0  0  0  0  0
    0.8660    0.5000    0.0000 C   0  0  0  0  0  0  0  0  0  0  0  0
    0.8660    1.5000    0.0000 O   0  0  0  0  0  0  0  0  0  0  0  0
    0.0000    0.0000    0.0000 O   0  0  0  0  0  0  0  0  0  0  0  0
  1  2  1  0
  2  3  1  0
  2  6  1  0
  3  4  1  0
  4  5  1  0
  6  7  2  0
  6  8  1  0
M  END
>  <group_A>  (185) 
1

>  <group_B>  (185) 
1

>  <group_C>  (185) 
1

>  <group_D>  (185) 
1

>  <group_G>  (185) 
1

>  <group_H>  (185) 
0

>  <group_J>  (185) 
1

>  <group_L>  (185) 
0

>  <group_M>  (185) 
1

>  <group_N>  (185) 
1

>  <group_P>  (185) 
0

>  <group_R>  (185) 
0

>  <group_S>  (185) 
1

>  <group_V>  (185) 
1

$$$$

     RDKit          2D

 26 28  0  0  0  0  0  0  0  0999 V2000
    2.5981   -0.5000    0.0000 N   0  0  0  0  0  0  0  0  0  0  0  0
    1.7321   -0.0000    0.0000 C   0  0  0  0  0  0  0  0  0  0  0  0
    1.7321    1.0000    0.0000 N   0  0  0  0  0  0  0  0  0  0  0  0
    0.8660    1.5000    0.0000 C   0  0  0  0  0  0  0  0  0  0  0  0
    0.0000    1.0000    0.0000 N   0  0  0  0  0  0  0  0  0  0  0  0
    0.0000   -0.0000    0.0000 C   0  0  0  0  0  0  0  0  0  0  0  0
    0.8660   -0.5000    0.0000 C   0  0  0  0  0  0  0  0  0  0  0  0
    0.6581   -1.4781    0.0000 N   0  0  0  0  0  0  0  0  0  0  0  0
   -0.3364   -1.5827    0.0000 C   0  0  0  0  0  0  0  0  0  0  0  0
   -0.7431   -0.6691    0.0000 N   0  0  0  0  0  0  0  0  0  0  0  0
   -1.7213   -0.4612    0.0000 C   0  0  0  0  0  0  0  0  0  0  0  0
   -2.4644   -1.1303    0.0000 O   0  0  0  0  0  0  0  0  0  0  0  0
   -3.3305   -0.6303    0.0000 C   0  0  0  0  0  0  0  0  0  0  0  0
   -4.2440   -1.0371    0.0000 C   0  0  0  0  0  0  0  0  0  0  0  0
   -5.0530   -0.4493    0.0000 S   0  0  0  0  0  0  0  0  0  0  0  0
   -5.9666   -0.8560    0.0000 C   0  0  0  0  0  0  0  0  0  0  0  0
   -6.7756   -0.2683    0.0000 C   0  0  0  0  0  0  0  0  0  0  0  0
   -7.6891   -0.6750    0.0000 C   0  0  0  0  0  0  0  0  0  0  0  0
   -8.4982   -0.0872    0.0000 N   0  0  0  0  0  0  0  0  0  0  0  0
   -7.7937   -1.6695    0.0000 C   0  0  0  0  0  0  0  0  0  0  0  0
   -8.7072   -2.0762    0.0000 O   0  0  0  0  0  0  0  0  0  0  0  0
   -6.9846   -2.2573    0.0000 O   0  0  0  0  0  0  0  0  0  0  0  0
   -3.1226    0.3478    0.0000 C   0  0  0  0  0  0  0  0  0  0  0  0
   -3.7917    1.0909    0.0000 O   0  0  0  0  0  0  0  0  0  0  0  0
   -2.1280    0.4523    0.0000 C   0  0  0  0  0  0  0  0  0  0  0  0
   -1.6280    1.3184    0.0000 O   0  0  0  0  0  0  0  0  0  0  0  0
  1  2  1  0
  2  3  2  0
  3  4  1  0
  4  5  2  0
  5  6  1  0
  6  7  2  0
  7  8  1  0
  7  2  1  0
  8  9  2  0
  9 10  1  0
 10 11  1  0
 10  6  1  0
 11 12  1  0
 12 13  1  0
 13 14  1  0
 13 23  1  0
 14 15  1  0
 15 16  1  0
 16 17  1  0
 17 18  1  0
 18 19  1  0
 18 20  1  0
 20 21  2  0
 20 22  1  0
 23 24  1  0
 23 25  1  0
 25 26  1  0
 25 11  1  0
M  END
>  <group_A>  (186) 
1

>  <group_B>  (186) 
0

>  <group_C>  (186) 
1

>  <group_D>  (186) 
1

>  <group_G>  (186) 
1

>  <group_H>  (186) 
0

>  <group_J>  (186) 
0

>  <group_L>  (186) 
0

>  <group_M>  (186) 
1

>  <group_N>  (186) 
1

>  <group_P>  (186) 
0

>  <group_R>  (186) 
1

>  <group_S>  (186) 
1

>  <group_V>  (186) 
1

$$$$

     RDKit          2D

  4  3  0  0  0  0  0  0  0  0999 V2000
    1.7321   -0.0000    0.0000 C   0  0  0  0  0  0  0  0  0  0  0  0
    0.8660    0.5000    0.0000 C   0  0  0  0  0  0  0  0  0  0  0  0
    0.8660    1.5000    0.0000 C   0  0  0  0  0  0  0  0  0  0  0  0
   -0.0000   -0.0000    0.0000 O   0  0  0  0  0  0  0  0  0  0  0  0
  1  2  1  0
  2  3  1  0
  2  4  2  0
M  END
>  <group_A>  (187) 
1

>  <group_B>  (187) 
0

>  <group_C>  (187) 
0

>  <group_D>  (187) 
0

>  <group_G>  (187) 
1

>  <group_H>  (187) 
0

>  <group_J>  (187) 
0

>  <group_L>  (187) 
0

>  <group_M>  (187) 
1

>  <group_N>  (187) 
0

>  <group_P>  (187) 
0

>  <group_R>  (187) 
0

>  <group_S>  (187) 
0

>  <group_V>  (187) 
0

$$$$

     RDKit          2D

 13 13  0  0  0  0  0  0  0  0999 V2000
    2.5981    0.5000    0.0000 N   0  0  0  0  0  0  0  0  0  0  0  0
    1.7321    0.0000    0.0000 C   0  0  0  0  0  0  0  0  0  0  0  0
    0.8660    0.5000    0.0000 C   0  0  0  0  0  0  0  0  0  0  0  0
    0.0000   -0.0000    0.0000 C   0  0  0  0  0  0  0  0  0  0  0  0
    0.0000   -1.0000    0.0000 C   0  0  0  0  0  0  0  0  0  0  0  0
   -0.8660   -1.5000    0.0000 C   0  0  0  0  0  0  0  0  0  0  0  0
   -1.7321   -1.0000    0.0000 C   0  0  0  0  0  0  0  0  0  0  0  0
   -2.5981   -1.5000    0.0000 I   0  0  0  0  0  0  0  0  0  0  0  0
   -1.7321   -0.0000    0.0000 C   0  0  0  0  0  0  0  0  0  0  0  0
   -0.8660    0.5000    0.0000 C   0  0  0  0  0  0  0  0  0  0  0  0
    1.7321   -1.0000    0.0000 C   0  0  0  0  0  0  0  0  0  0  0  0
    0.8660   -1.5000    0.0000 O   0  0  0  0  0  0  0  0  0  0  0  0
    2.5981   -1.5000    0.0000 O   0  0  0  0  0  0  0  0  0  0  0  0
  1  2  1  0
  2  3  1  0
  2 11  1  0
  3  4  1  0
  4  5  2  0
  5  6  1  0
  6  7  2  0
  7  8  1  0
  7  9  1  0
  9 10  2  0
 10  4  1  0
 11 12  2  0
 11 13  1  0
M  END
>  <group_A>  (188) 
1

>  <group_B>  (188) 
0

>  <group_C>  (188) 
0

>  <group_D>  (188) 
0

>  <group_G>  (188) 
0

>  <group_H>  (188) 
0

>  <group_J>  (188) 
0

>  <group_L>  (188) 
0

>  <group_M>  (188) 
0

>  <group_N>  (188) 
0

>  <group_P>  (188) 
0

>  <group_R>  (188) 
0

>  <group_S>  (188) 
0

>  <group_V>  (188) 
0

$$$$

     RDKit          2D

  7  6  0  0  0  0  0  0  0  0999 V2000
    1.7321    0.0000    0.0000 C   0  0  0  0  0  0  0  0  0  0  0  0
    1.7321    1.0000    0.0000 C   0  0  0  0  0  0  0  0  0  0  0  0
    0.8660    1.5000    0.0000 C   0  0  0  0  0  0  0  0  0  0  0  0
    0.8660    2.5000    0.0000 N   0  0  0  0  0  0  0  0  0  0  0  0
   -0.0000    1.0000    0.0000 C   0  0  0  0  0  0  0  0  0  0  0  0
   -0.8660    1.5000    0.0000 O   0  0  0  0  0  0  0  0  0  0  0  0
   -0.0000   -0.0000    0.0000 O   0  0  0  0  0  0  0  0  0  0  0  0
  1  2  1  0
  2  3  1  0
  3  4  1  0
  3  5  1  0
  5  6  2  0
  5  7  1  0
M  END
>  <group_A>  (189) 
1

>  <group_B>  (189) 
1

>  <group_C>  (189) 
1

>  <group_D>  (189) 
1

>  <group_G>  (189) 
1

>  <group_H>  (189) 
0

>  <group_J>  (189) 
1

>  <group_L>  (189) 
1

>  <group_M>  (189) 
1

>  <group_N>  (189) 
1

>  <group_P>  (189) 
0

>  <group_R>  (189) 
1

>  <group_S>  (189) 
1

>  <group_V>  (189) 
1

$$$$

     RDKit          2D

  7  6  0  0  0  0  0  0  0  0999 V2000
    1.7321   -0.0000    0.0000 C   0  0  0  0  0  0  0  0  0  0  0  0
    1.7321    1.0000    0.0000 C   0  0  0  0  0  0  0  0  0  0  0  0
    2.5981    1.5000    0.0000 C   0  0  0  0  0  0  0  0  0  0  0  0
    0.8660    1.5000    0.0000 C   0  0  0  0  0  0  0  0  0  0  0  0
   -0.0000    1.0000    0.0000 C   0  0  0  0  0  0  0  0  0  0  0  0
   -0.8660    1.5000    0.0000 O   0  0  0  0  0  0  0  0  0  0  0  0
    0.0000    0.0000    0.0000 O   0  0  0  0  0  0  0  0  0  0  0  0
  1  2  1  0
  2  3  1  0
  2  4  1  0
  4  5  1  0
  5  6  2  0
  5  7  1  0
M  END
>  <group_A>  (190) 
1

>  <group_B>  (190) 
1

>  <group_C>  (190) 
1

>  <group_D>  (190) 
0

>  <group_G>  (190) 
0

>  <group_H>  (190) 
0

>  <group_J>  (190) 
0

>  <group_L>  (190) 
0

>  <group_M>  (190) 
0

>  <group_N>  (190) 
0

>  <group_P>  (190) 
0

>  <group_R>  (190) 
0

>  <group_S>  (190) 
0

>  <group_V>  (190) 
1

$$$$

     RDKit          2D

 10 10  0  0  0  0  0  0  0  0999 V2000
    0.8660    0.5000    0.0000 N   0  0  0  0  0  0  0  0  0  0  0  0
    0.0000   -0.0000    0.0000 C   0  0  0  0  0  0  0  0  0  0  0  0
   -0.0000   -1.0000    0.0000 C   0  0  0  0  0  0  0  0  0  0  0  0
   -0.8660   -1.5000    0.0000 C   0  0  0  0  0  0  0  0  0  0  0  0
   -1.7321   -1.0000    0.0000 C   0  0  0  0  0  0  0  0  0  0  0  0
   -1.7321    0.0000    0.0000 C   0  0  0  0  0  0  0  0  0  0  0  0
   -2.5981    0.5000    0.0000 C   0  0  0  0  0  0  0  0  0  0  0  0
   -2.5981    1.5000    0.0000 O   0  0  0  0  0  0  0  0  0  0  0  0
   -3.4641   -0.0000    0.0000 O   0  0  0  0  0  0  0  0  0  0  0  0
   -0.8660    0.5000    0.0000 C   0  0  0  0  0  0  0  0  0  0  0  0
  1  2  1  0
  2  3  2  0
  3  4  1  0
  4  5  2  0
  5  6  1  0
  6  7  1  0
  6 10  2  0
  7  8  2  0
  7  9  1  0
 10  2  1  0
M  END
>  <group_A>  (191) 
1

>  <group_B>  (191) 
0

>  <group_C>  (191) 
0

>  <group_D>  (191) 
0

>  <group_G>  (191) 
0

>  <group_H>  (191) 
0

>  <group_J>  (191) 
0

>  <group_L>  (191) 
0

>  <group_M>  (191) 
0

>  <group_N>  (191) 
0

>  <group_P>  (191) 
0

>  <group_R>  (191) 
0

>  <group_S>  (191) 
0

>  <group_V>  (191) 
0

$$$$

     RDKit          2D

 15 16  0  0  0  0  0  0  0  0999 V2000
    2.5472    3.4190    0.0000 N   0  0  0  0  0  0  0  0  0  0  0  0
    2.2382    2.4680    0.0000 C   0  0  0  0  0  0  0  0  0  0  0  0
    1.2601    2.2601    0.0000 C   0  0  0  0  0  0  0  0  0  0  0  0
    0.9511    1.3090    0.0000 C   0  0  0  0  0  0  0  0  0  0  0  0
    1.5388    0.5000    0.0000 C   0  0  0  0  0  0  0  0  0  0  0  0
    0.9511   -0.3090    0.0000 N   0  0  0  0  0  0  0  0  0  0  0  0
    0.0000   -0.0000    0.0000 C   0  0  0  0  0  0  0  0  0  0  0  0
   -0.8660   -0.5000    0.0000 C   0  0  0  0  0  0  0  0  0  0  0  0
   -1.7321    0.0000    0.0000 C   0  0  0  0  0  0  0  0  0  0  0  0
   -1.7321    1.0000    0.0000 C   0  0  0  0  0  0  0  0  0  0  0  0
   -0.8660    1.5000    0.0000 C   0  0  0  0  0  0  0  0  0  0  0  0
    0.0000    1.0000    0.0000 C   0  0  0  0  0  0  0  0  0  0  0  0
    2.9074    1.7248    0.0000 C   0  0  0  0  0  0  0  0  0  0  0  0
    2.5983    0.7738    0.0000 O   0  0  0  0  0  0  0  0  0  0  0  0
    3.8855    1.9328    0.0000 O   0  0  0  0  0  0  0  0  0  0  0  0
  1  2  1  0
  2  3  1  0
  2 13  1  0
  3  4  1  0
  4  5  2  0
  5  6  1  0
  6  7  1  0
  7  8  2  0
  8  9  1  0
  9 10  2  0
 10 11  1  0
 11 12  2  0
 12  4  1  0
 12  7  1  0
 13 14  2  0
 13 15  1  0
M  END
>  <group_A>  (192) 
1

>  <group_B>  (192) 
0

>  <group_C>  (192) 
0

>  <group_D>  (192) 
0

>  <group_G>  (192) 
0

>  <group_H>  (192) 
0

>  <group_J>  (192) 
0

>  <group_L>  (192) 
0

>  <group_M>  (192) 
0

>  <group_N>  (192) 
1

>  <group_P>  (192) 
0

>  <group_R>  (192) 
0

>  <group_S>  (192) 
0

>  <group_V>  (192) 
0

$$$$

     RDKit          2D

  9  8  0  0  0  0  0  0  0  0999 V2000
    1.7321   -1.0000    0.0000 N   0  0  0  0  0  0  0  0  0  0  0  0
    1.7321    0.0000    0.0000 C   0  0  0  0  0  0  0  0  0  0  0  0
    2.5981    0.5000    0.0000 C   0  0  0  0  0  0  0  0  0  0  0  0
    2.5981    1.5000    0.0000 C   0  0  0  0  0  0  0  0  0  0  0  0
    3.4641    2.0000    0.0000 O   0  0  0  0  0  0  0  0  0  0  0  0
    1.7321    2.0000    0.0000 O   0  0  0  0  0  0  0  0  0  0  0  0
    0.8660    0.5000    0.0000 C   0  0  0  0  0  0  0  0  0  0  0  0
    0.8660    1.5000    0.0000 O   0  0  0  0  0  0  0  0  0  0  0  0
    0.0000    0.0000    0.0000 O   0  0  0  0  0  0  0  0  0  0  0  0
  1  2  1  0
  2  3  1  0
  2  7  1  0
  3  4  1  0
  4  5  2  0
  4  6  1  0
  7  8  2  0
  7  9  1  0
M  END
>  <group_A>  (193) 
1

>  <group_B>  (193) 
1

>  <group_C>  (193) 
1

>  <group_D>  (193) 
0

>  <group_G>  (193) 
1

>  <group_H>  (193) 
0

>  <group_J>  (193) 
0

>  <group_L>  (193) 
0

>  <group_M>  (193) 
0

>  <group_N>  (193) 
0

>  <group_P>  (193) 
0

>  <group_R>  (193) 
0

>  <group_S>  (193) 
1

>  <group_V>  (193) 
1

$$$$

     RDKit          2D

 10  9  0  0  0  0  0  0  0  0999 V2000
   -1.7321    1.0000    0.0000 N   0  0  0  0  0  0  0  0  0  0  0  0
   -1.7321    0.0000    0.0000 C   0  0  0  0  0  0  0  0  0  0  0  0
   -2.5981   -0.5000    0.0000 C   0  0  0  0  0  0  0  0  0  0  0  0
   -2.5981   -1.5000    0.0000 C   0  0  0  0  0  0  0  0  0  0  0  0
   -3.4641   -2.0000    0.0000 C   0  0  0  0  0  0  0  0  0  0  0  0
   -4.3301   -1.5000    0.0000 O   0  0  0  0  0  0  0  0  0  0  0  0
   -3.4641   -3.0000    0.0000 O   0  0  0  0  0  0  0  0  0  0  0  0
   -0.8660   -0.5000    0.0000 C   0  0  0  0  0  0  0  0  0  0  0  0
   -0.8660   -1.5000    0.0000 O   0  0  0  0  0  0  0  0  0  0  0  0
    0.0000   -0.0000    0.0000 O   0  0  0  0  0  0  0  0  0  0  0  0
  1  2  1  0
  2  3  1  0
  2  8  1  0
  3  4  1  0
  4  5  1  0
  5  6  2  0
  5  7  1  0
  8  9  2  0
  8 10  1  0
M  END
>  <group_A>  (194) 
1

>  <group_B>  (194) 
1

>  <group_C>  (194) 
1

>  <group_D>  (194) 
1

>  <group_G>  (194) 
1

>  <group_H>  (194) 
0

>  <group_J>  (194) 
0

>  <group_L>  (194) 
0

>  <group_M>  (194) 
1

>  <group_N>  (194) 
1

>  <group_P>  (194) 
0

>  <group_R>  (194) 
0

>  <group_S>  (194) 
1

>  <group_V>  (194) 
1

$$$$

     RDKit          2D

 14 14  0  0  0  0  0  0  0  0999 V2000
    0.8660    1.5000    0.0000 C   0  0  0  0  0  0  0  0  0  0  0  0
   -0.0000    1.0000    0.0000 O   0  0  0  0  0  0  0  0  0  0  0  0
    0.0000   -0.0000    0.0000 C   0  0  0  0  0  0  0  0  0  0  0  0
    0.8660   -0.5000    0.0000 C   0  0  0  0  0  0  0  0  0  0  0  0
    0.8660   -1.5000    0.0000 C   0  0  0  0  0  0  0  0  0  0  0  0
    1.7321   -2.0000    0.0000 C   0  0  0  0  0  0  0  0  0  0  0  0
    1.7321   -3.0000    0.0000 C   0  0  0  0  0  0  0  0  0  0  0  0
    2.5981   -3.5000    0.0000 C   0  0  0  0  0  0  0  0  0  0  0  0
    2.5981   -4.5000    0.0000 O   0  0  0  0  0  0  0  0  0  0  0  0
    3.4641   -3.0000    0.0000 O   0  0  0  0  0  0  0  0  0  0  0  0
    0.0000   -2.0000    0.0000 C   0  0  0  0  0  0  0  0  0  0  0  0
   -0.8660   -1.5000    0.0000 C   0  0  0  0  0  0  0  0  0  0  0  0
   -0.8660   -0.5000    0.0000 C   0  0  0  0  0  0  0  0  0  0  0  0
   -1.7321   -0.0000    0.0000 O   0  0  0  0  0  0  0  0  0  0  0  0
  1  2  1  0
  2  3  1  0
  3  4  2  0
  4  5  1  0
  5  6  1  0
  5 11  2  0
  6  7  2  3
  7  8  1  0
  8  9  2  0
  8 10  1  0
 11 12  1  0
 12 13  2  0
 13 14  1  0
 13  3  1  0
M  END
>  <group_A>  (195) 
1

>  <group_B>  (195) 
0

>  <group_C>  (195) 
0

>  <group_D>  (195) 
0

>  <group_G>  (195) 
0

>  <group_H>  (195) 
0

>  <group_J>  (195) 
0

>  <group_L>  (195) 
0

>  <group_M>  (195) 
0

>  <group_N>  (195) 
0

>  <group_P>  (195) 
0

>  <group_R>  (195) 
0

>  <group_S>  (195) 
0

>  <group_V>  (195) 
0

$$$$

     RDKit          2D

  1  0  0  0  0  0  0  0  0  0999 V2000
    1.0000    0.0000    0.0000 O   0  0  0  0  0  0  0  0  0  0  0  0
M  END
>  <group_A>  (196) 
1

>  <group_B>  (196) 
0

>  <group_C>  (196) 
0

>  <group_D>  (196) 
0

>  <group_G>  (196) 
1

>  <group_H>  (196) 
0

>  <group_J>  (196) 
0

>  <group_L>  (196) 
0

>  <group_M>  (196) 
0

>  <group_N>  (196) 
0

>  <group_P>  (196) 
0

>  <group_R>  (196) 
0

>  <group_S>  (196) 
1

>  <group_V>  (196) 
1

$$$$

     RDKit          2D

 13 13  0  0  0  0  0  0  0  0999 V2000
   -1.7321   -0.0000    0.0000 N   0  0  0  0  0  0  0  0  0  0  0  0
   -0.8660   -0.5000    0.0000 C   0  0  0  0  0  0  0  0  0  0  0  0
   -0.8660   -1.5000    0.0000 C   0  0  0  0  0  0  0  0  0  0  0  0
   -1.7321   -2.0000    0.0000 O   0  0  0  0  0  0  0  0  0  0  0  0
    0.0000   -2.0000    0.0000 O   0  0  0  0  0  0  0  0  0  0  0  0
    0.0000   -0.0000    0.0000 C   0  0  0  0  0  0  0  0  0  0  0  0
   -0.0000    1.0000    0.0000 C   0  0  0  0  0  0  0  0  0  0  0  0
    0.8660    1.5000    0.0000 C   0  0  0  0  0  0  0  0  0  0  0  0
    0.8660    2.5000    0.0000 O   0  0  0  0  0  0  0  0  0  0  0  0
    1.7321    1.0000    0.0000 C   0  0  0  0  0  0  0  0  0  0  0  0
    1.7321    0.0000    0.0000 C   0  0  0  0  0  0  0  0  0  0  0  0
    2.5981   -0.5000    0.0000 O   0  0  0  0  0  0  0  0  0  0  0  0
    0.8660   -0.5000    0.0000 C   0  0  0  0  0  0  0  0  0  0  0  0
  1  2  1  0
  2  3  1  0
  2  6  1  0
  3  4  2  0
  3  5  1  0
  6  7  2  0
  7  8  1  0
  8  9  1  0
  8 10  2  0
 10 11  1  0
 11 12  1  0
 11 13  2  0
 13  6  1  0
M  END
>  <group_A>  (197) 
1

>  <group_B>  (197) 
1

>  <group_C>  (197) 
1

>  <group_D>  (197) 
0

>  <group_G>  (197) 
1

>  <group_H>  (197) 
0

>  <group_J>  (197) 
0

>  <group_L>  (197) 
0

>  <group_M>  (197) 
1

>  <group_N>  (197) 
0

>  <group_P>  (197) 
0

>  <group_R>  (197) 
0

>  <group_S>  (197) 
1

>  <group_V>  (197) 
1

$$$$

     RDKit          2D

 12 12  0  0  0  0  0  0  0  0999 V2000
   -0.8660   -1.5000    0.0000 N   0  0  0  0  0  0  0  0  0  0  0  0
   -0.0000   -1.0000    0.0000 C   0  0  0  0  0  0  0  0  0  0  0  0
    0.8660   -1.5000    0.0000 C   0  0  0  0  0  0  0  0  0  0  0  0
    0.8660   -2.5000    0.0000 O   0  0  0  0  0  0  0  0  0  0  0  0
    1.7321   -1.0000    0.0000 O   0  0  0  0  0  0  0  0  0  0  0  0
    0.0000    0.0000    0.0000 C   0  0  0  0  0  0  0  0  0  0  0  0
   -0.8660    0.5000    0.0000 C   0  0  0  0  0  0  0  0  0  0  0  0
   -0.8660    1.5000    0.0000 C   0  0  0  0  0  0  0  0  0  0  0  0
    0.0000    2.0000    0.0000 C   0  0  0  0  0  0  0  0  0  0  0  0
    0.0000    3.0000    0.0000 O   0  0  0  0  0  0  0  0  0  0  0  0
    0.8660    1.5000    0.0000 C   0  0  0  0  0  0  0  0  0  0  0  0
    0.8660    0.5000    0.0000 C   0  0  0  0  0  0  0  0  0  0  0  0
  1  2  1  0
  2  3  1  0
  2  6  1  0
  3  4  2  0
  3  5  1  0
  6  7  2  0
  7  8  1  0
  8  9  2  0
  9 10  1  0
  9 11  1  0
 11 12  2  0
 12  6  1  0
M  END
>  <group_A>  (198) 
1

>  <group_B>  (198) 
1

>  <group_C>  (198) 
1

>  <group_D>  (198) 
0

>  <group_G>  (198) 
1

>  <group_H>  (198) 
0

>  <group_J>  (198) 
0

>  <group_L>  (198) 
0

>  <group_M>  (198) 
1

>  <group_N>  (198) 
0

>  <group_P>  (198) 
0

>  <group_R>  (198) 
0

>  <group_S>  (198) 
1

>  <group_V>  (198) 
1

$$$$

     RDKit          2D

 10  9  0  0  0  0  0  0  0  0999 V2000
   -0.8660   -1.5000    0.0000 C   0  0  0  0  0  0  0  0  0  0  0  0
   -0.0000   -2.0000    0.0000 N   0  0  0  0  0  0  0  0  0  0  0  0
    0.8660   -1.5000    0.0000 C   0  0  0  0  0  0  0  0  0  0  0  0
    1.7321   -2.0000    0.0000 C   0  0  0  0  0  0  0  0  0  0  0  0
    2.5981   -1.5000    0.0000 C   0  0  0  0  0  0  0  0  0  0  0  0
    3.4641   -2.0000    0.0000 C   0  0  0  0  0  0  0  0  0  0  0  0
    2.5981   -0.5000    0.0000 C   0  0  0  0  0  0  0  0  0  0  0  0
    0.8660   -0.5000    0.0000 C   0  0  0  0  0  0  0  0  0  0  0  0
    1.7321   -0.0000    0.0000 O   0  0  0  0  0  0  0  0  0  0  0  0
    0.0000   -0.0000    0.0000 O   0  0  0  0  0  0  0  0  0  0  0  0
  1  2  1  0
  2  3  1  0
  3  4  1  0
  3  8  1  0
  4  5  1  0
  5  6  1  0
  5  7  1  0
  8  9  2  0
  8 10  1  0
M  END
>  <group_A>  (199) 
1

>  <group_B>  (199) 
1

>  <group_C>  (199) 
1

>  <group_D>  (199) 
0

>  <group_G>  (199) 
1

>  <group_H>  (199) 
0

>  <group_J>  (199) 
0

>  <group_L>  (199) 
0

>  <group_M>  (199) 
0

>  <group_N>  (199) 
0

>  <group_P>  (199) 
0

>  <group_R>  (199) 
0

>  <group_S>  (199) 
0

>  <group_V>  (199) 
1

$$$$

     RDKit          2D

  8  7  0  0  0  0  0  0  0  0999 V2000
    2.5981   -1.5000    0.0000 C   0  0  0  0  0  0  0  0  0  0  0  0
    2.5981   -0.5000    0.0000 C   0  0  0  0  0  0  0  0  0  0  0  0
    3.4641   -0.0000    0.0000 O   0  0  0  0  0  0  0  0  0  0  0  0
    1.7321   -0.0000    0.0000 C   0  0  0  0  0  0  0  0  0  0  0  0
    0.8660   -0.5000    0.0000 C   0  0  0  0  0  0  0  0  0  0  0  0
    0.3660   -1.3660    0.0000 C   0  0  0  0  0  0  0  0  0  0  0  0
    1.3660   -1.3660    0.0000 C   0  0  0  0  0  0  0  0  0  0  0  0
    0.0000    0.0000    0.0000 O   0  0  0  0  0  0  0  0  0  0  0  0
  1  2  1  0
  2  3  1  0
  2  4  1  0
  4  5  1  0
  5  6  1  0
  5  7  1  0
  5  8  1  0
M  END
>  <group_A>  (200) 
1

>  <group_B>  (200) 
1

>  <group_C>  (200) 
1

>  <group_D>  (200) 
0

>  <group_G>  (200) 
1

>  <group_H>  (200) 
0

>  <group_J>  (200) 
1

>  <group_L>  (200) 
0

>  <group_M>  (200) 
1

>  <group_N>  (200) 
0

>  <group_P>  (200) 
0

>  <group_R>  (200) 
0

>  <group_S>  (200) 
1

>  <group_V>  (200) 
1

$$$$

     RDKit          2D

 15 15  0  0  0  0  0  0  0  0999 V2000
   -1.7321   -1.0000    0.0000 N   0  0  0  0  0  0  0  0  0  0  0  0
   -0.8660   -1.5000    0.0000 C   0  0  0  0  0  0  0  0  0  0  0  0
   -0.8660   -2.5000    0.0000 C   0  0  0  0  0  0  0  0  0  0  0  0
   -1.7321   -3.0000    0.0000 O   0  0  0  0  0  0  0  0  0  0  0  0
    0.0000   -3.0000    0.0000 O   0  0  0  0  0  0  0  0  0  0  0  0
    0.0000   -1.0000    0.0000 C   0  0  0  0  0  0  0  0  0  0  0  0
    0.8660   -1.5000    0.0000 O   0  0  0  0  0  0  0  0  0  0  0  0
    0.0000   -0.0000    0.0000 C   0  0  0  0  0  0  0  0  0  0  0  0
   -0.8660    0.5000    0.0000 C   0  0  0  0  0  0  0  0  0  0  0  0
   -0.8660    1.5000    0.0000 C   0  0  0  0  0  0  0  0  0  0  0  0
   -0.0000    2.0000    0.0000 C   0  0  0  0  0  0  0  0  0  0  0  0
   -0.0000    3.0000    0.0000 O   0  0  0  0  0  0  0  0  0  0  0  0
    0.8660    1.5000    0.0000 C   0  0  0  0  0  0  0  0  0  0  0  0
    1.7321    2.0000    0.0000 Cl  0  0  0  0  0  0  0  0  0  0  0  0
    0.8660    0.5000    0.0000 C   0  0  0  0  0  0  0  0  0  0  0  0
  1  2  1  0
  2  3  1  0
  2  6  1  0
  3  4  2  0
  3  5  1  0
  6  7  1  0
  6  8  1  0
  8  9  2  0
  9 10  1  0
 10 11  2  0
 11 12  1  0
 11 13  1  0
 13 14  1  0
 13 15  2  0
 15  8  1  0
M  END
>  <group_A>  (201) 
1

>  <group_B>  (201) 
1

>  <group_C>  (201) 
1

>  <group_D>  (201) 
0

>  <group_G>  (201) 
1

>  <group_H>  (201) 
0

>  <group_J>  (201) 
0

>  <group_L>  (201) 
0

>  <group_M>  (201) 
1

>  <group_N>  (201) 
0

>  <group_P>  (201) 
0

>  <group_R>  (201) 
0

>  <group_S>  (201) 
0

>  <group_V>  (201) 
1

$$$$

     RDKit          2D

 15 15  0  0  0  0  0  0  0  0999 V2000
   -1.7321   -1.0000    0.0000 N   0  0  0  0  0  0  0  0  0  0  0  0
   -0.8660   -1.5000    0.0000 C   0  0  0  0  0  0  0  0  0  0  0  0
   -0.8660   -2.5000    0.0000 C   0  0  0  0  0  0  0  0  0  0  0  0
   -1.7321   -3.0000    0.0000 O   0  0  0  0  0  0  0  0  0  0  0  0
    0.0000   -3.0000    0.0000 O   0  0  0  0  0  0  0  0  0  0  0  0
    0.0000   -1.0000    0.0000 C   0  0  0  0  0  0  0  0  0  0  0  0
    0.8660   -1.5000    0.0000 O   0  0  0  0  0  0  0  0  0  0  0  0
    0.0000   -0.0000    0.0000 C   0  0  0  0  0  0  0  0  0  0  0  0
   -0.8660    0.5000    0.0000 C   0  0  0  0  0  0  0  0  0  0  0  0
   -0.8660    1.5000    0.0000 C   0  0  0  0  0  0  0  0  0  0  0  0
   -0.0000    2.0000    0.0000 C   0  0  0  0  0  0  0  0  0  0  0  0
   -0.0000    3.0000    0.0000 O   0  0  0  0  0  0  0  0  0  0  0  0
    0.8660    1.5000    0.0000 C   0  0  0  0  0  0  0  0  0  0  0  0
    1.7321    2.0000    0.0000 Cl  0  0  0  0  0  0  0  0  0  0  0  0
    0.8660    0.5000    0.0000 C   0  0  0  0  0  0  0  0  0  0  0  0
  1  2  1  0
  2  3  1  0
  2  6  1  0
  3  4  2  0
  3  5  1  0
  6  7  1  0
  6  8  1  0
  8  9  2  0
  9 10  1  0
 10 11  2  0
 11 12  1  0
 11 13  1  0
 13 14  1  0
 13 15  2  0
 15  8  1  0
M  END
>  <group_A>  (202) 
1

>  <group_B>  (202) 
1

>  <group_C>  (202) 
1

>  <group_D>  (202) 
0

>  <group_G>  (202) 
1

>  <group_H>  (202) 
0

>  <group_J>  (202) 
0

>  <group_L>  (202) 
0

>  <group_M>  (202) 
0

>  <group_N>  (202) 
0

>  <group_P>  (202) 
0

>  <group_R>  (202) 
0

>  <group_S>  (202) 
0

>  <group_V>  (202) 
1

$$$$

     RDKit          2D

 16 16  0  0  0  0  0  0  0  0999 V2000
    1.0000   -1.0000    0.0000 O   0  0  0  0  0  0  0  0  0  0  0  0
    1.0000   -0.0000    0.0000 P   0  0  0  0  0  0  0  0  0  0  0  0
    2.0000   -0.0000    0.0000 O   0  0  0  0  0  0  0  0  0  0  0  0
    1.0000    1.0000    0.0000 O   0  0  0  0  0  0  0  0  0  0  0  0
    0.0000    0.0000    0.0000 O   0  0  0  0  0  0  0  0  0  0  0  0
   -0.5000    0.8660    0.0000 C   0  0  0  0  0  0  0  0  0  0  0  0
   -1.5000    0.8660    0.0000 C   0  0  0  0  0  0  0  0  0  0  0  0
   -2.0000    0.0000    0.0000 O   0  0  0  0  0  0  0  0  0  0  0  0
   -3.0000    0.0000    0.0000 C   0  0  0  0  0  0  0  0  0  0  0  0
   -3.5000   -0.8660    0.0000 O   0  0  0  0  0  0  0  0  0  0  0  0
   -3.5000    0.8660    0.0000 C   0  0  0  0  0  0  0  0  0  0  0  0
   -4.5000    0.8660    0.0000 O   0  0  0  0  0  0  0  0  0  0  0  0
   -3.0000    1.7321    0.0000 C   0  0  0  0  0  0  0  0  0  0  0  0
   -3.5000    2.5981    0.0000 O   0  0  0  0  0  0  0  0  0  0  0  0
   -2.0000    1.7321    0.0000 C   0  0  0  0  0  0  0  0  0  0  0  0
   -1.5000    2.5981    0.0000 O   0  0  0  0  0  0  0  0  0  0  0  0
  1  2  2  0
  2  3  1  0
  2  4  1  0
  2  5  1  0
  5  6  1  0
  6  7  1  0
  7  8  1  0
  8  9  1  0
  9 10  1  0
  9 11  1  0
 11 12  1  0
 11 13  1  0
 13 14  1  0
 13 15  1  0
 15 16  1  0
 15  7  1  0
M  END
>  <group_A>  (203) 
1

>  <group_B>  (203) 
1

>  <group_C>  (203) 
1

>  <group_D>  (203) 
0

>  <group_G>  (203) 
0

>  <group_H>  (203) 
0

>  <group_J>  (203) 
0

>  <group_L>  (203) 
0

>  <group_M>  (203) 
0

>  <group_N>  (203) 
0

>  <group_P>  (203) 
0

>  <group_R>  (203) 
0

>  <group_S>  (203) 
0

>  <group_V>  (203) 
1

$$$$

     RDKit          2D

  2  1  0  0  0  0  0  0  0  0999 V2000
    1.0000   -0.0000    0.0000 O   0  0  0  0  0  0  0  0  0  0  0  0
   -0.0000   -0.0000    0.0000 Cu  0  0  0  0  0  2  0  0  0  0  0  0
  1  2  2  0
M  END
>  <group_A>  (204) 
1

>  <group_B>  (204) 
0

>  <group_C>  (204) 
0

>  <group_D>  (204) 
0

>  <group_G>  (204) 
0

>  <group_H>  (204) 
0

>  <group_J>  (204) 
0

>  <group_L>  (204) 
0

>  <group_M>  (204) 
0

>  <group_N>  (204) 
0

>  <group_P>  (204) 
0

>  <group_R>  (204) 
0

>  <group_S>  (204) 
0

>  <group_V>  (204) 
0

$$$$

     RDKit          2D

  3  2  0  0  0  0  0  0  0  0999 V2000
    1.7321   -0.0000    0.0000 Cu  0  0  0  0  0  1  0  0  0  0  0  0
    0.8660    0.5000    0.0000 O   0  0  0  0  0  0  0  0  0  0  0  0
   -0.0000   -0.0000    0.0000 Cu  0  0  0  0  0  1  0  0  0  0  0  0
  1  2  1  0
  2  3  1  0
M  END
>  <group_A>  (205) 
1

>  <group_B>  (205) 
0

>  <group_C>  (205) 
0

>  <group_D>  (205) 
0

>  <group_G>  (205) 
0

>  <group_H>  (205) 
0

>  <group_J>  (205) 
0

>  <group_L>  (205) 
0

>  <group_M>  (205) 
0

>  <group_N>  (205) 
0

>  <group_P>  (205) 
0

>  <group_R>  (205) 
0

>  <group_S>  (205) 
0

>  <group_V>  (205) 
0

$$$$

     RDKit          2D

 12 12  0  0  0  0  0  0  0  0999 V2000
    0.4483   -1.6730    0.0000 O   0  0  0  0  0  0  0  0  0  0  0  0
    0.7071   -0.7071    0.0000 C   0  0  0  0  0  0  0  0  0  0  0  0
    1.6730   -0.4483    0.0000 O   0  0  0  0  0  0  0  0  0  0  0  0
    0.0000    0.0000    0.0000 C   0  0  0  0  0  0  0  0  0  0  0  0
   -0.9239   -0.3827    0.0000 O   0  0  0  0  0  0  0  0  0  0  0  0
   -0.8660    0.5000    0.0000 C   0  0  0  0  0  0  0  0  0  0  0  0
   -0.8660    1.5000    0.0000 C   0  0  0  0  0  0  0  0  0  0  0  0
    0.0000    2.0000    0.0000 C   0  0  0  0  0  0  0  0  0  0  0  0
    0.0000    3.0000    0.0000 O   0  0  0  0  0  0  0  0  0  0  0  0
    0.8660    1.5000    0.0000 C   0  0  0  0  0  0  0  0  0  0  0  0
    1.7321    2.0000    0.0000 O   0  0  0  0  0  0  0  0  0  0  0  0
    0.8660    0.5000    0.0000 C   0  0  0  0  0  0  0  0  0  0  0  0
  1  2  2  0
  2  3  1  0
  2  4  1  0
  4  5  1  0
  4  6  1  0
  6  7  2  0
  7  8  1  0
  8  9  1  0
  8 10  1  0
 10 11  1  0
 10 12  1  0
 12  4  1  0
M  END
>  <group_A>  (206) 
1

>  <group_B>  (206) 
0

>  <group_C>  (206) 
0

>  <group_D>  (206) 
0

>  <group_G>  (206) 
0

>  <group_H>  (206) 
0

>  <group_J>  (206) 
0

>  <group_L>  (206) 
0

>  <group_M>  (206) 
0

>  <group_N>  (206) 
0

>  <group_P>  (206) 
0

>  <group_R>  (206) 
0

>  <group_S>  (206) 
0

>  <group_V>  (206) 
0

$$$$

     RDKit          2D

 10  9  0  0  0  0  0  0  0  0999 V2000
   -0.8660    0.5000    0.0000 O   0  0  0  0  0  0  0  0  0  0  0  0
   -1.7321    0.0000    0.0000 C   0  0  0  0  0  0  0  0  0  0  0  0
   -2.5981    0.5000    0.0000 O   0  0  0  0  0  0  0  0  0  0  0  0
   -1.7321   -1.0000    0.0000 C   0  0  0  0  0  0  0  0  0  0  0  0
   -2.5981   -1.5000    0.0000 O   0  0  0  0  0  0  0  0  0  0  0  0
   -0.8660   -1.5000    0.0000 C   0  0  0  0  0  0  0  0  0  0  0  0
   -0.8660   -2.5000    0.0000 O   0  0  0  0  0  0  0  0  0  0  0  0
    0.0000   -1.0000    0.0000 C   0  0  0  0  0  0  0  0  0  0  0  0
    0.8660   -1.5000    0.0000 O   0  0  0  0  0  0  0  0  0  0  0  0
    0.0000   -0.0000    0.0000 O   0  0  0  0  0  0  0  0  0  0  0  0
  1  2  2  0
  2  3  1  0
  2  4  1  0
  4  5  1  0
  4  6  1  0
  6  7  1  0
  6  8  1  0
  8  9  2  0
  8 10  1  0
M  END
>  <group_A>  (207) 
1

>  <group_B>  (207) 
1

>  <group_C>  (207) 
1

>  <group_D>  (207) 
0

>  <group_G>  (207) 
1

>  <group_H>  (207) 
0

>  <group_J>  (207) 
0

>  <group_L>  (207) 
0

>  <group_M>  (207) 
1

>  <group_N>  (207) 
0

>  <group_P>  (207) 
0

>  <group_R>  (207) 
0

>  <group_S>  (207) 
1

>  <group_V>  (207) 
1

$$$$

     RDKit          2D

 25 26  0  0  0  0  0  0  0  0999 V2000
   -7.2749    2.7172    0.0000 O   0  0  0  0  0  0  0  0  0  0  0  0
   -6.4659    2.1294    0.0000 C   0  0  0  0  0  0  0  0  0  0  0  0
   -5.5523    2.5361    0.0000 C   0  0  0  0  0  0  0  0  0  0  0  0
   -4.7433    1.9483    0.0000 C   0  0  0  0  0  0  0  0  0  0  0  0
   -4.8479    0.9538    0.0000 N   0  0  0  0  0  0  0  0  0  0  0  0
   -4.0388    0.3660    0.0000 C   0  0  0  0  0  0  0  0  0  0  0  0
   -3.0878    0.6750    0.0000 O   0  0  0  0  0  0  0  0  0  0  0  0
   -2.5000   -0.1340    0.0000 C   0  0  0  0  0  0  0  0  0  0  0  0
   -1.5000   -0.1340    0.0000 C   0  0  0  0  0  0  0  0  0  0  0  0
   -1.0000   -1.0000    0.0000 O   0  0  0  0  0  0  0  0  0  0  0  0
    0.0000   -1.0000    0.0000 P   0  0  0  0  0  0  0  0  0  0  0  0
    0.0000   -2.0000    0.0000 O   0  0  0  0  0  0  0  0  0  0  0  0
    1.0000   -1.0000    0.0000 O   0  0  0  0  0  0  0  0  0  0  0  0
    0.0000   -0.0000    0.0000 O   0  0  0  0  0  0  0  0  0  0  0  0
   -0.0000    1.0000    0.0000 P   0  0  0  0  0  0  0  0  0  0  0  0
    1.0000    1.0000    0.0000 O   0  0  0  0  0  0  0  0  0  0  0  0
   -0.0000    2.0000    0.0000 O   0  0  0  0  0  0  0  0  0  0  0  0
   -1.0000    1.0000    0.0000 O   0  0  0  0  0  0  0  0  0  0  0  0
   -3.0878   -0.9430    0.0000 C   0  0  0  0  0  0  0  0  0  0  0  0
   -2.7788   -1.8940    0.0000 O   0  0  0  0  0  0  0  0  0  0  0  0
   -4.0388   -0.6340    0.0000 C   0  0  0  0  0  0  0  0  0  0  0  0
   -4.8479   -1.2218    0.0000 O   0  0  0  0  0  0  0  0  0  0  0  0
   -5.7614    0.5471    0.0000 C   0  0  0  0  0  0  0  0  0  0  0  0
   -5.8659   -0.4474    0.0000 O   0  0  0  0  0  0  0  0  0  0  0  0
   -6.5704    1.1349    0.0000 N   0  0  0  0  0  0  0  0  0  0  0  0
  1  2  2  0
  2  3  1  0
  3  4  2  0
  4  5  1  0
  5  6  1  0
  5 23  1  0
  6  7  1  0
  7  8  1  0
  8  9  1  0
  8 19  1  0
  9 10  1  0
 10 11  1  0
 11 12  2  0
 11 13  1  0
 11 14  1  0
 14 15  1  0
 15 16  2  0
 15 17  1  0
 15 18  1  0
 19 20  1  0
 19 21  1  0
 21 22  1  0
 21  6  1  0
 23 24  2  0
 23 25  1  0
 25  2  1  0
M  END
>  <group_A>  (208) 
1

>  <group_B>  (208) 
1

>  <group_C>  (208) 
1

>  <group_D>  (208) 
1

>  <group_G>  (208) 
1

>  <group_H>  (208) 
0

>  <group_J>  (208) 
1

>  <group_L>  (208) 
0

>  <group_M>  (208) 
1

>  <group_N>  (208) 
1

>  <group_P>  (208) 
0

>  <group_R>  (208) 
0

>  <group_S>  (208) 
1

>  <group_V>  (208) 
1

$$$$

     RDKit          2D

  4  3  0  0  0  0  0  0  0  0999 V2000
    1.7321   -0.0000    0.0000 O   0  0  0  0  0  0  0  0  0  0  0  0
    0.8660    0.5000    0.0000 N   0  0  0  0  0  0  0  0  0  0  0  0
    0.8660    1.5000    0.0000 O   0  0  0  0  0  0  0  0  0  0  0  0
   -0.0000   -0.0000    0.0000 O   0  0  0  0  0  0  0  0  0  0  0  0
  1  2  2  0
  2  3  1  0
  2  4  1  0
M  CHG  3   2   1   3  -1   4  -1
M  END
>  <group_A>  (209) 
1

>  <group_B>  (209) 
1

>  <group_C>  (209) 
1

>  <group_D>  (209) 
0

>  <group_G>  (209) 
1

>  <group_H>  (209) 
1

>  <group_J>  (209) 
0

>  <group_L>  (209) 
0

>  <group_M>  (209) 
1

>  <group_N>  (209) 
0

>  <group_P>  (209) 
0

>  <group_R>  (209) 
0

>  <group_S>  (209) 
1

>  <group_V>  (209) 
1

$$$$

     RDKit          2D

 12 11  0  0  0  0  0  0  0  0999 V2000
    0.1340   -2.5000    0.0000 C   0  0  0  0  0  0  0  0  0  0  0  0
    0.1340   -1.5000    0.0000 C   0  0  0  0  0  0  0  0  0  0  0  0
    1.0000   -1.0000    0.0000 O   0  0  0  0  0  0  0  0  0  0  0  0
    1.0000    0.0000    0.0000 P   0  0  0  0  0  0  0  0  0  0  0  0
    2.0000    0.0000    0.0000 O   0  0  0  0  0  0  0  0  0  0  0  0
    1.0000    1.0000    0.0000 O   0  0  0  0  0  0  0  0  0  0  0  0
    0.0000    0.0000    0.0000 O   0  0  0  0  0  0  0  0  0  0  0  0
   -0.7321   -1.0000    0.0000 C   0  0  0  0  0  0  0  0  0  0  0  0
   -0.7321    0.0000    0.0000 N   0  0  0  0  0  0  0  0  0  0  0  0
   -1.5981   -1.5000    0.0000 C   0  0  0  0  0  0  0  0  0  0  0  0
   -2.4641   -1.0000    0.0000 O   0  0  0  0  0  0  0  0  0  0  0  0
   -1.5981   -2.5000    0.0000 O   0  0  0  0  0  0  0  0  0  0  0  0
  1  2  1  0
  2  3  1  0
  2  8  1  0
  3  4  1  0
  4  5  2  0
  4  6  1  0
  4  7  1  0
  8  9  1  0
  8 10  1  0
 10 11  2  0
 10 12  1  0
M  END
>  <group_A>  (210) 
1

>  <group_B>  (210) 
1

>  <group_C>  (210) 
1

>  <group_D>  (210) 
0

>  <group_G>  (210) 
1

>  <group_H>  (210) 
0

>  <group_J>  (210) 
0

>  <group_L>  (210) 
1

>  <group_M>  (210) 
1

>  <group_N>  (210) 
0

>  <group_P>  (210) 
0

>  <group_R>  (210) 
0

>  <group_S>  (210) 
1

>  <group_V>  (210) 
1

$$$$

     RDKit          2D

 13 12  0  0  0  0  0  0  0  0999 V2000
    0.0000    2.0000    0.0000 N   0  0  0  0  0  0  0  0  0  0  0  0
   -0.8660    1.5000    0.0000 C   0  0  0  0  0  0  0  0  0  0  0  0
   -1.7321    2.0000    0.0000 C   0  0  0  0  0  0  0  0  0  0  0  0
   -2.5981    1.5000    0.0000 C   0  0  0  0  0  0  0  0  0  0  0  0
   -2.5981    0.5000    0.0000 C   0  0  0  0  0  0  0  0  0  0  0  0
   -3.4641    0.0000    0.0000 C   0  0  0  0  0  0  0  0  0  0  0  0
   -4.3301    0.5000    0.0000 N   0  0  0  0  0  0  0  0  0  0  0  0
   -4.3301    1.5000    0.0000 C   0  0  0  0  0  0  0  0  0  0  0  0
   -3.4641    2.0000    0.0000 O   0  0  0  0  0  0  0  0  0  0  0  0
   -5.1962    2.0000    0.0000 O   0  0  0  0  0  0  0  0  0  0  0  0
   -0.8660    0.5000    0.0000 C   0  0  0  0  0  0  0  0  0  0  0  0
   -1.7321   -0.0000    0.0000 O   0  0  0  0  0  0  0  0  0  0  0  0
    0.0000   -0.0000    0.0000 O   0  0  0  0  0  0  0  0  0  0  0  0
  1  2  1  0
  2  3  1  0
  2 11  1  0
  3  4  1  0
  4  5  1  0
  5  6  1  0
  6  7  1  0
  7  8  1  0
  8  9  2  0
  8 10  1  0
 11 12  2  0
 11 13  1  0
M  END
>  <group_A>  (211) 
1

>  <group_B>  (211) 
0

>  <group_C>  (211) 
0

>  <group_D>  (211) 
0

>  <group_G>  (211) 
1

>  <group_H>  (211) 
0

>  <group_J>  (211) 
0

>  <group_L>  (211) 
0

>  <group_M>  (211) 
1

>  <group_N>  (211) 
0

>  <group_P>  (211) 
0

>  <group_R>  (211) 
0

>  <group_S>  (211) 
1

>  <group_V>  (211) 
1

$$$$

     RDKit          2D

  6  5  0  0  0  0  0  0  0  0999 V2000
    1.7321    0.0000    0.0000 N   0  0  0  0  0  0  0  0  0  0  0  0
    1.7321    1.0000    0.0000 O   0  0  0  0  0  0  0  0  0  0  0  0
    0.8660    1.5000    0.0000 C   0  0  0  0  0  0  0  0  0  0  0  0
   -0.0000    1.0000    0.0000 C   0  0  0  0  0  0  0  0  0  0  0  0
   -0.8660    1.5000    0.0000 O   0  0  0  0  0  0  0  0  0  0  0  0
   -0.0000   -0.0000    0.0000 O   0  0  0  0  0  0  0  0  0  0  0  0
  1  2  1  0
  2  3  1  0
  3  4  1  0
  4  5  2  0
  4  6  1  0
M  END
>  <group_A>  (212) 
1

>  <group_B>  (212) 
0

>  <group_C>  (212) 
0

>  <group_D>  (212) 
0

>  <group_G>  (212) 
0

>  <group_H>  (212) 
0

>  <group_J>  (212) 
0

>  <group_L>  (212) 
0

>  <group_M>  (212) 
0

>  <group_N>  (212) 
0

>  <group_P>  (212) 
0

>  <group_R>  (212) 
0

>  <group_S>  (212) 
0

>  <group_V>  (212) 
0

$$$$

     RDKit          2D

  8  8  0  0  0  0  0  0  0  0999 V2000
    0.1810   -1.7226    0.0000 O   0  0  0  0  0  0  0  0  0  0  0  0
    0.5878   -0.8090    0.0000 C   0  0  0  0  0  0  0  0  0  0  0  0
    1.5823   -0.7045    0.0000 O   0  0  0  0  0  0  0  0  0  0  0  0
    0.0000    0.0000    0.0000 C   0  0  0  0  0  0  0  0  0  0  0  0
   -1.0000    0.0000    0.0000 C   0  0  0  0  0  0  0  0  0  0  0  0
   -1.3090    0.9511    0.0000 C   0  0  0  0  0  0  0  0  0  0  0  0
   -0.5000    1.5388    0.0000 C   0  0  0  0  0  0  0  0  0  0  0  0
    0.3090    0.9511    0.0000 N   0  0  0  0  0  0  0  0  0  0  0  0
  1  2  2  0
  2  3  1  0
  2  4  1  0
  4  5  1  0
  5  6  1  0
  6  7  1  0
  7  8  1  0
  8  4  1  0
M  END
>  <group_A>  (213) 
1

>  <group_B>  (213) 
1

>  <group_C>  (213) 
0

>  <group_D>  (213) 
0

>  <group_G>  (213) 
0

>  <group_H>  (213) 
0

>  <group_J>  (213) 
0

>  <group_L>  (213) 
0

>  <group_M>  (213) 
0

>  <group_N>  (213) 
0

>  <group_P>  (213) 
0

>  <group_R>  (213) 
0

>  <group_S>  (213) 
0

>  <group_V>  (213) 
1

$$$$

     RDKit          2D

  8  7  0  0  0  0  0  0  0  0999 V2000
    1.7321   -1.0000    0.0000 N   0  0  0  0  0  0  0  0  0  0  0  0
    1.7321   -0.0000    0.0000 C   0  0  0  0  0  0  0  0  0  0  0  0
    2.5981    0.5000    0.0000 C   0  0  0  0  0  0  0  0  0  0  0  0
    2.5981    1.5000    0.0000 C   0  0  0  0  0  0  0  0  0  0  0  0
    3.4641    2.0000    0.0000 O   0  0  0  0  0  0  0  0  0  0  0  0
    0.8660    0.5000    0.0000 C   0  0  0  0  0  0  0  0  0  0  0  0
    0.8660    1.5000    0.0000 O   0  0  0  0  0  0  0  0  0  0  0  0
    0.0000    0.0000    0.0000 O   0  0  0  0  0  0  0  0  0  0  0  0
  1  2  1  0
  2  3  1  0
  2  6  1  0
  3  4  1  0
  4  5  1  0
  6  7  2  0
  6  8  1  0
M  END
>  <group_A>  (214) 
1

>  <group_B>  (214) 
0

>  <group_C>  (214) 
0

>  <group_D>  (214) 
0

>  <group_G>  (214) 
0

>  <group_H>  (214) 
0

>  <group_J>  (214) 
0

>  <group_L>  (214) 
0

>  <group_M>  (214) 
0

>  <group_N>  (214) 
0

>  <group_P>  (214) 
0

>  <group_R>  (214) 
0

>  <group_S>  (214) 
0

>  <group_V>  (214) 
0

$$$$

     RDKit          2D

 13 13  0  0  0  0  0  0  0  0999 V2000
    1.7321    3.0000    0.0000 C   0  0  0  0  0  0  0  0  0  0  0  0
    0.8660    2.5000    0.0000 N   0  0  0  0  0  0  0  0  0  0  0  0
    0.8660    1.5000    0.0000 C   0  0  0  0  0  0  0  0  0  0  0  0
    0.0000    1.0000    0.0000 C   0  0  0  0  0  0  0  0  0  0  0  0
    0.0000   -0.0000    0.0000 C   0  0  0  0  0  0  0  0  0  0  0  0
    0.8660   -0.5000    0.0000 C   0  0  0  0  0  0  0  0  0  0  0  0
    0.8660   -1.5000    0.0000 C   0  0  0  0  0  0  0  0  0  0  0  0
   -0.0000   -2.0000    0.0000 C   0  0  0  0  0  0  0  0  0  0  0  0
   -0.8660   -1.5000    0.0000 C   0  0  0  0  0  0  0  0  0  0  0  0
   -0.8660   -0.5000    0.0000 C   0  0  0  0  0  0  0  0  0  0  0  0
    1.7321    1.0000    0.0000 C   0  0  0  0  0  0  0  0  0  0  0  0
    1.7321   -0.0000    0.0000 O   0  0  0  0  0  0  0  0  0  0  0  0
    2.5981    1.5000    0.0000 O   0  0  0  0  0  0  0  0  0  0  0  0
  1  2  1  0
  2  3  1  0
  3  4  1  0
  3 11  1  0
  4  5  1  0
  5  6  2  0
  6  7  1  0
  7  8  2  0
  8  9  1  0
  9 10  2  0
 10  5  1  0
 11 12  2  0
 11 13  1  0
M  END
>  <group_A>  (215) 
0

>  <group_B>  (215) 
1

>  <group_C>  (215) 
1

>  <group_D>  (215) 
0

>  <group_G>  (215) 
0

>  <group_H>  (215) 
0

>  <group_J>  (215) 
0

>  <group_L>  (215) 
0

>  <group_M>  (215) 
0

>  <group_N>  (215) 
0

>  <group_P>  (215) 
0

>  <group_R>  (215) 
0

>  <group_S>  (215) 
0

>  <group_V>  (215) 
1

$$$$

     RDKit          2D

  1  0  0  0  0  0  0  0  0  0999 V2000
    1.0000    0.0000    0.0000 *   0  0  0  0  0  0  0  0  0  0  0  0
V    1 *
A    1
R
M  END
>  <group_A>  (216) 
1

>  <group_B>  (216) 
1

>  <group_C>  (216) 
1

>  <group_D>  (216) 
0

>  <group_G>  (216) 
1

>  <group_H>  (216) 
0

>  <group_J>  (216) 
0

>  <group_L>  (216) 
0

>  <group_M>  (216) 
1

>  <group_N>  (216) 
0

>  <group_P>  (216) 
0

>  <group_R>  (216) 
0

>  <group_S>  (216) 
1

>  <group_V>  (216) 
1

$$$$

     RDKit          2D

 24 26  0  0  0  0  0  0  0  0999 V2000
   -5.6646   -4.3675    0.0000 O   0  0  0  0  0  0  0  0  0  0  0  0
   -5.2578   -3.4540    0.0000 C   0  0  0  0  0  0  0  0  0  0  0  0
   -5.8456   -2.6450    0.0000 C   0  0  0  0  0  0  0  0  0  0  0  0
   -6.8456   -2.6450    0.0000 C   0  0  0  0  0  0  0  0  0  0  0  0
   -7.1546   -1.6939    0.0000 C   0  0  0  0  0  0  0  0  0  0  0  0
   -6.3456   -1.1061    0.0000 C   0  0  0  0  0  0  0  0  0  0  0  0
   -5.5366   -1.6939    0.0000 N   0  0  0  0  0  0  0  0  0  0  0  0
   -4.5856   -1.3849    0.0000 C   0  0  0  0  0  0  0  0  0  0  0  0
   -3.8424   -2.0540    0.0000 O   0  0  0  0  0  0  0  0  0  0  0  0
   -4.3776   -0.4067    0.0000 C   0  0  0  0  0  0  0  0  0  0  0  0
   -5.0468    0.3364    0.0000 C   0  0  0  0  0  0  0  0  0  0  0  0
   -4.5468    1.2024    0.0000 C   0  0  0  0  0  0  0  0  0  0  0  0
   -3.5686    0.9945    0.0000 C   0  0  0  0  0  0  0  0  0  0  0  0
   -3.4641    0.0000    0.0000 N   0  0  0  0  0  0  0  0  0  0  0  0
   -2.5981   -0.5000    0.0000 C   0  0  0  0  0  0  0  0  0  0  0  0
   -2.5981   -1.5000    0.0000 O   0  0  0  0  0  0  0  0  0  0  0  0
   -1.7321    0.0000    0.0000 O   0  0  0  0  0  0  0  0  0  0  0  0
   -0.8660   -0.5000    0.0000 C   0  0  0  0  0  0  0  0  0  0  0  0
    0.0000    0.0000    0.0000 C   0  0  0  0  0  0  0  0  0  0  0  0
    0.0000    1.0000    0.0000 C   0  0  0  0  0  0  0  0  0  0  0  0
    0.8660    1.5000    0.0000 C   0  0  0  0  0  0  0  0  0  0  0  0
    1.7321    1.0000    0.0000 C   0  0  0  0  0  0  0  0  0  0  0  0
    1.7321   -0.0000    0.0000 C   0  0  0  0  0  0  0  0  0  0  0  0
    0.8660   -0.5000    0.0000 C   0  0  0  0  0  0  0  0  0  0  0  0
  1  2  2  0
  2  3  1  0
  3  4  1  0
  4  5  1  0
  5  6  1  0
  6  7  1  0
  7  8  1  0
  7  3  1  0
  8  9  2  0
  8 10  1  0
 10 11  1  0
 11 12  1  0
 12 13  1  0
 13 14  1  0
 14 15  1  0
 14 10  1  0
 15 16  2  0
 15 17  1  0
 17 18  1  0
 18 19  1  0
 19 20  2  0
 20 21  1  0
 21 22  2  0
 22 23  1  0
 23 24  2  0
 24 19  1  0
M  END
>  <group_A>  (217) 
1

>  <group_B>  (217) 
0

>  <group_C>  (217) 
0

>  <group_D>  (217) 
0

>  <group_G>  (217) 
0

>  <group_H>  (217) 
0

>  <group_J>  (217) 
0

>  <group_L>  (217) 
0

>  <group_M>  (217) 
0

>  <group_N>  (217) 
0

>  <group_P>  (217) 
0

>  <group_R>  (217) 
0

>  <group_S>  (217) 
0

>  <group_V>  (217) 
0

$$$$

     RDKit          2D

  8  8  0  0  0  0  0  0  0  0999 V2000
    0.1810   -1.7226    0.0000 O   0  0  0  0  0  0  0  0  0  0  0  0
    0.5878   -0.8090    0.0000 C   0  0  0  0  0  0  0  0  0  0  0  0
    1.5823   -0.7045    0.0000 O   0  0  0  0  0  0  0  0  0  0  0  0
    0.0000    0.0000    0.0000 C   0  0  0  0  0  0  0  0  0  0  0  0
   -1.0000    0.0000    0.0000 C   0  0  0  0  0  0  0  0  0  0  0  0
   -1.3090    0.9511    0.0000 C   0  0  0  0  0  0  0  0  0  0  0  0
   -0.5000    1.5388    0.0000 C   0  0  0  0  0  0  0  0  0  0  0  0
    0.3090    0.9511    0.0000 N   0  0  0  0  0  0  0  0  0  0  0  0
  1  2  2  0
  2  3  1  0
  2  4  1  0
  4  5  1  0
  5  6  1  0
  6  7  1  0
  7  8  1  0
  8  4  1  0
M  END
>  <group_A>  (218) 
1

>  <group_B>  (218) 
1

>  <group_C>  (218) 
0

>  <group_D>  (218) 
0

>  <group_G>  (218) 
1

>  <group_H>  (218) 
0

>  <group_J>  (218) 
0

>  <group_L>  (218) 
0

>  <group_M>  (218) 
0

>  <group_N>  (218) 
0

>  <group_P>  (218) 
0

>  <group_R>  (218) 
0

>  <group_S>  (218) 
1

>  <group_V>  (218) 
0

$$$$

     RDKit          2D

 11 10  0  0  0  0  0  0  0  0999 V2000
    0.6340   -1.3660    0.0000 C   0  0  0  0  0  0  0  0  0  0  0  0
    1.5000   -0.8660    0.0000 C   0  0  0  0  0  0  0  0  0  0  0  0
    2.0000   -1.7321    0.0000 N   0  0  0  0  0  0  0  0  0  0  0  0
    2.3660   -0.3660    0.0000 C   0  0  0  0  0  0  0  0  0  0  0  0
    2.3660    0.6340    0.0000 C   0  0  0  0  0  0  0  0  0  0  0  0
    3.2321    1.1340    0.0000 C   0  0  0  0  0  0  0  0  0  0  0  0
    4.0981    0.6340    0.0000 N   0  0  0  0  0  0  0  0  0  0  0  0
    3.2321    2.1340    0.0000 O   0  0  0  0  0  0  0  0  0  0  0  0
    1.0000    0.0000    0.0000 C   0  0  0  0  0  0  0  0  0  0  0  0
    1.5000    0.8660    0.0000 O   0  0  0  0  0  0  0  0  0  0  0  0
    0.0000    0.0000    0.0000 O   0  0  0  0  0  0  0  0  0  0  0  0
  1  2  1  0
  2  3  1  0
  2  4  1  0
  2  9  1  0
  4  5  1  0
  5  6  1  0
  6  7  1  0
  6  8  2  0
  9 10  2  0
  9 11  1  0
M  END
>  <group_A>  (219) 
1

>  <group_B>  (219) 
0

>  <group_C>  (219) 
0

>  <group_D>  (219) 
0

>  <group_G>  (219) 
1

>  <group_H>  (219) 
0

>  <group_J>  (219) 
0

>  <group_L>  (219) 
0

>  <group_M>  (219) 
0

>  <group_N>  (219) 
0

>  <group_P>  (219) 
0

>  <group_R>  (219) 
0

>  <group_S>  (219) 
1

>  <group_V>  (219) 
0

$$$$

     RDKit          2D

 34 36  0  0  0  0  0  0  0  0999 V2000
    5.1962   -2.0000    0.0000 O   0  0  0  0  0  0  0  0  0  0  0  0
    6.0622   -1.5000    0.0000 C   0  0  0  0  0  0  0  0  0  0  0  0
    6.0622   -0.5000    0.0000 C   0  0  0  0  0  0  0  0  0  0  0  0
    5.1962    0.0000    0.0000 O   0  0  0  0  0  0  0  0  0  0  0  0
    5.1962    1.0000    0.0000 C   0  0  0  0  0  0  0  0  0  0  0  0
    4.3301    1.5000    0.0000 O   0  0  0  0  0  0  0  0  0  0  0  0
    3.4641    1.0000    0.0000 C   0  0  0  0  0  0  0  0  0  0  0  0
    2.5981    1.5000    0.0000 C   0  0  0  0  0  0  0  0  0  0  0  0
    2.5981    2.5000    0.0000 C   0  0  0  0  0  0  0  0  0  0  0  0
    1.7321    3.0000    0.0000 O   0  0  0  0  0  0  0  0  0  0  0  0
    1.7321    1.0000    0.0000 O   0  0  0  0  0  0  0  0  0  0  0  0
    1.7321    0.0000    0.0000 C   0  0  0  0  0  0  0  0  0  0  0  0
    0.8660   -0.5000    0.0000 O   0  0  0  0  0  0  0  0  0  0  0  0
    0.0000    0.0000    0.0000 C   0  0  0  0  0  0  0  0  0  0  0  0
   -0.0000    1.0000    0.0000 C   0  0  0  0  0  0  0  0  0  0  0  0
    0.8660    1.5000    0.0000 C   0  0  0  0  0  0  0  0  0  0  0  0
    0.8660    2.5000    0.0000 O   0  0  0  0  0  0  0  0  0  0  0  0
   -0.8660    1.5000    0.0000 O   0  0  0  0  0  0  0  0  0  0  0  0
   -1.7321    1.0000    0.0000 C   0  0  0  0  0  0  0  0  0  0  0  0
   -2.5981    1.5000    0.0000 O   0  0  0  0  0  0  0  0  0  0  0  0
   -1.7321    0.0000    0.0000 C   0  0  0  0  0  0  0  0  0  0  0  0
   -2.5981   -0.5000    0.0000 O   0  0  0  0  0  0  0  0  0  0  0  0
   -0.8660   -0.5000    0.0000 C   0  0  0  0  0  0  0  0  0  0  0  0
   -0.8660   -1.5000    0.0000 O   0  0  0  0  0  0  0  0  0  0  0  0
    2.5981   -0.5000    0.0000 C   0  0  0  0  0  0  0  0  0  0  0  0
    2.5981   -1.5000    0.0000 O   0  0  0  0  0  0  0  0  0  0  0  0
    3.4641    0.0000    0.0000 C   0  0  0  0  0  0  0  0  0  0  0  0
    4.3301   -0.5000    0.0000 O   0  0  0  0  0  0  0  0  0  0  0  0
    6.0622    1.5000    0.0000 C   0  0  0  0  0  0  0  0  0  0  0  0
    6.0622    2.5000    0.0000 O   0  0  0  0  0  0  0  0  0  0  0  0
    6.9282    1.0000    0.0000 C   0  0  0  0  0  0  0  0  0  0  0  0
    7.7942    1.5000    0.0000 O   0  0  0  0  0  0  0  0  0  0  0  0
    6.9282    0.0000    0.0000 C   0  0  0  0  0  0  0  0  0  0  0  0
    7.7942   -0.5000    0.0000 O   0  0  0  0  0  0  0  0  0  0  0  0
  1  2  1  0
  2  3  1  0
  3  4  1  0
  4  5  1  0
  5  6  1  0
  5 29  1  0
  6  7  1  0
  7  8  1  0
  8  9  1  0
  8 11  1  0
  9 10  1  0
 11 12  1  0
 12 13  1  0
 12 25  1  0
 13 14  1  0
 14 15  1  0
 15 16  1  0
 15 18  1  0
 16 17  1  0
 18 19  1  0
 19 20  1  0
 19 21  1  0
 21 22  1  0
 21 23  1  0
 23 24  1  0
 23 14  1  0
 25 26  1  0
 25 27  1  0
 27 28  1  0
 27  7  1  0
 29 30  1  0
 29 31  1  0
 31 32  1  0
 31 33  1  0
 33 34  1  0
 33  3  1  0
M  END
>  <group_A>  (220) 
0

>  <group_B>  (220) 
1

>  <group_C>  (220) 
1

>  <group_D>  (220) 
0

>  <group_G>  (220) 
0

>  <group_H>  (220) 
0

>  <group_J>  (220) 
0

>  <group_L>  (220) 
0

>  <group_M>  (220) 
0

>  <group_N>  (220) 
0

>  <group_P>  (220) 
0

>  <group_R>  (220) 
0

>  <group_S>  (220) 
0

>  <group_V>  (220) 
1

$$$$

     RDKit          2D

 11 11  0  0  0  0  0  0  0  0999 V2000
    0.8660    0.5000    0.0000 C   0  0  0  0  0  0  0  0  0  0  0  0
    0.0000   -0.0000    0.0000 C   0  0  0  0  0  0  0  0  0  0  0  0
   -0.0000   -1.0000    0.0000 O   0  0  0  0  0  0  0  0  0  0  0  0
   -0.8660   -1.5000    0.0000 C   0  0  0  0  0  0  0  0  0  0  0  0
   -0.8660   -2.5000    0.0000 O   0  0  0  0  0  0  0  0  0  0  0  0
   -1.7321   -1.0000    0.0000 C   0  0  0  0  0  0  0  0  0  0  0  0
   -1.7321    0.0000    0.0000 C   0  0  0  0  0  0  0  0  0  0  0  0
   -2.2321    0.8660    0.0000 C   0  0  0  0  0  0  0  0  0  0  0  0
   -2.7321    0.0000    0.0000 N   0  0  0  0  0  0  0  0  0  0  0  0
   -0.8660    0.5000    0.0000 C   0  0  0  0  0  0  0  0  0  0  0  0
   -0.8660    1.5000    0.0000 O   0  0  0  0  0  0  0  0  0  0  0  0
  1  2  1  0
  2  3  1  0
  3  4  1  0
  4  5  1  0
  4  6  1  0
  6  7  1  0
  7  8  1  0
  7  9  1  0
  7 10  1  0
 10 11  1  0
 10  2  1  0
M  END
>  <group_A>  (221) 
1

>  <group_B>  (221) 
1

>  <group_C>  (221) 
1

>  <group_D>  (221) 
0

>  <group_G>  (221) 
0

>  <group_H>  (221) 
0

>  <group_J>  (221) 
0

>  <group_L>  (221) 
0

>  <group_M>  (221) 
0

>  <group_N>  (221) 
0

>  <group_P>  (221) 
0

>  <group_R>  (221) 
0

>  <group_S>  (221) 
0

>  <group_V>  (221) 
1

$$$$

     RDKit          2D

 14 14  0  0  0  0  0  0  0  0999 V2000
    1.7321    1.0000    0.0000 N   0  0  0  0  0  0  0  0  0  0  0  0
    0.8660    1.5000    0.0000 C   0  0  0  0  0  0  0  0  0  0  0  0
    0.8660    2.5000    0.0000 C   0  0  0  0  0  0  0  0  0  0  0  0
    1.7321    3.0000    0.0000 O   0  0  0  0  0  0  0  0  0  0  0  0
   -0.0000    3.0000    0.0000 O   0  0  0  0  0  0  0  0  0  0  0  0
   -0.0000    1.0000    0.0000 C   0  0  0  0  0  0  0  0  0  0  0  0
   -0.8660    1.5000    0.0000 O   0  0  0  0  0  0  0  0  0  0  0  0
   -0.0000   -0.0000    0.0000 C   0  0  0  0  0  0  0  0  0  0  0  0
    0.8660   -0.5000    0.0000 C   0  0  0  0  0  0  0  0  0  0  0  0
    0.8660   -1.5000    0.0000 C   0  0  0  0  0  0  0  0  0  0  0  0
    0.0000   -2.0000    0.0000 C   0  0  0  0  0  0  0  0  0  0  0  0
    0.0000   -3.0000    0.0000 O   0  0  0  0  0  0  0  0  0  0  0  0
   -0.8660   -1.5000    0.0000 C   0  0  0  0  0  0  0  0  0  0  0  0
   -0.8660   -0.5000    0.0000 C   0  0  0  0  0  0  0  0  0  0  0  0
  1  2  1  0
  2  3  1  0
  2  6  1  0
  3  4  2  0
  3  5  1  0
  6  7  1  0
  6  8  1  0
  8  9  2  0
  9 10  1  0
 10 11  2  0
 11 12  1  0
 11 13  1  0
 13 14  2  0
 14  8  1  0
M  END
>  <group_A>  (222) 
1

>  <group_B>  (222) 
1

>  <group_C>  (222) 
1

>  <group_D>  (222) 
0

>  <group_G>  (222) 
0

>  <group_H>  (222) 
0

>  <group_J>  (222) 
0

>  <group_L>  (222) 
0

>  <group_M>  (222) 
0

>  <group_N>  (222) 
0

>  <group_P>  (222) 
0

>  <group_R>  (222) 
0

>  <group_S>  (222) 
0

>  <group_V>  (222) 
1

$$$$

     RDKit          2D

  2  1  0  0  0  0  0  0  0  0999 V2000
    1.0000   -0.0000    0.0000 O   0  0  0  0  0  0  0  0  0  0  0  0
   -0.0000   -0.0000    0.0000 O   0  0  0  0  0  0  0  0  0  0  0  0
  1  2  2  0
M  END
>  <group_A>  (223) 
1

>  <group_B>  (223) 
1

>  <group_C>  (223) 
1

>  <group_D>  (223) 
0

>  <group_G>  (223) 
1

>  <group_H>  (223) 
0

>  <group_J>  (223) 
1

>  <group_L>  (223) 
0

>  <group_M>  (223) 
1

>  <group_N>  (223) 
0

>  <group_P>  (223) 
0

>  <group_R>  (223) 
0

>  <group_S>  (223) 
1

>  <group_V>  (223) 
1

$$$$

     RDKit          2D

 12 11  0  0  0  0  0  0  0  0999 V2000
   -0.8660    0.5000    0.0000 C   0  0  0  0  0  0  0  0  0  0  0  0
   -1.7321    0.0000    0.0000 C   0  0  0  0  0  0  0  0  0  0  0  0
   -2.5981    0.5000    0.0000 C   0  0  0  0  0  0  0  0  0  0  0  0
   -1.7321   -1.0000    0.0000 C   0  0  0  0  0  0  0  0  0  0  0  0
   -2.5981   -1.5000    0.0000 C   0  0  0  0  0  0  0  0  0  0  0  0
   -3.4641   -1.0000    0.0000 O   0  0  0  0  0  0  0  0  0  0  0  0
   -2.5981   -2.5000    0.0000 O   0  0  0  0  0  0  0  0  0  0  0  0
   -0.8660   -1.5000    0.0000 C   0  0  0  0  0  0  0  0  0  0  0  0
   -0.8660   -2.5000    0.0000 O   0  0  0  0  0  0  0  0  0  0  0  0
    0.0000   -1.0000    0.0000 C   0  0  0  0  0  0  0  0  0  0  0  0
    0.8660   -1.5000    0.0000 O   0  0  0  0  0  0  0  0  0  0  0  0
    0.0000   -0.0000    0.0000 O   0  0  0  0  0  0  0  0  0  0  0  0
  1  2  1  0
  2  3  1  0
  2  4  1  0
  4  5  1  0
  4  8  1  0
  5  6  2  0
  5  7  1  0
  8  9  1  0
  8 10  1  0
 10 11  2  0
 10 12  1  0
M  END
>  <group_A>  (224) 
1

>  <group_B>  (224) 
0

>  <group_C>  (224) 
0

>  <group_D>  (224) 
0

>  <group_G>  (224) 
0

>  <group_H>  (224) 
0

>  <group_J>  (224) 
0

>  <group_L>  (224) 
0

>  <group_M>  (224) 
0

>  <group_N>  (224) 
0

>  <group_P>  (224) 
0

>  <group_R>  (224) 
0

>  <group_S>  (224) 
0

>  <group_V>  (224) 
0

$$$$

     RDKit          2D

  7  7  0  0  0  0  0  0  0  0999 V2000
   -0.0000   -1.0000    0.0000 N   0  0  0  0  0  0  0  0  0  0  0  0
    0.0000    0.0000    0.0000 C   0  0  0  0  0  0  0  0  0  0  0  0
   -0.8660    0.5000    0.0000 C   0  0  0  0  0  0  0  0  0  0  0  0
   -0.8660    1.5000    0.0000 C   0  0  0  0  0  0  0  0  0  0  0  0
    0.0000    2.0000    0.0000 C   0  0  0  0  0  0  0  0  0  0  0  0
    0.8660    1.5000    0.0000 C   0  0  0  0  0  0  0  0  0  0  0  0
    0.8660    0.5000    0.0000 C   0  0  0  0  0  0  0  0  0  0  0  0
  1  2  1  0
  2  3  2  0
  3  4  1  0
  4  5  2  0
  5  6  1  0
  6  7  2  0
  7  2  1  0
M  END
>  <group_A>  (225) 
1

>  <group_B>  (225) 
0

>  <group_C>  (225) 
0

>  <group_D>  (225) 
0

>  <group_G>  (225) 
0

>  <group_H>  (225) 
0

>  <group_J>  (225) 
0

>  <group_L>  (225) 
0

>  <group_M>  (225) 
0

>  <group_N>  (225) 
0

>  <group_P>  (225) 
0

>  <group_R>  (225) 
0

>  <group_S>  (225) 
0

>  <group_V>  (225) 
0

$$$$

     RDKit          2D

 32 35  0  0  0  0  0  0  0  0999 V2000
    5.1962    3.0000    0.0000 C   0  0  0  0  0  0  0  0  0  0  0  0
    4.3301    2.5000    0.0000 N   0  0  0  0  0  0  0  0  0  0  0  0
    3.4641    3.0000    0.0000 C   0  0  0  0  0  0  0  0  0  0  0  0
    4.3301    1.5000    0.0000 C   0  0  0  0  0  0  0  0  0  0  0  0
    5.1962    1.0000    0.0000 C   0  0  0  0  0  0  0  0  0  0  0  0
    6.0622    1.5000    0.0000 O   0  0  0  0  0  0  0  0  0  0  0  0
    5.1962    0.0000    0.0000 C   0  0  0  0  0  0  0  0  0  0  0  0
    6.0622   -0.5000    0.0000 C   0  0  0  0  0  0  0  0  0  0  0  0
    6.0622   -1.5000    0.0000 N   0  0  0  0  0  0  0  0  0  0  0  0
    6.9282    0.0000    0.0000 O   0  0  0  0  0  0  0  0  0  0  0  0
    4.3301   -0.5000    0.0000 C   0  0  0  0  0  0  0  0  0  0  0  0
    4.3301   -1.5000    0.0000 O   0  0  0  0  0  0  0  0  0  0  0  0
    3.4641    0.0000    0.0000 C   0  0  0  0  0  0  0  0  0  0  0  0
    3.4641   -1.0000    0.0000 O   0  0  0  0  0  0  0  0  0  0  0  0
    2.5981   -0.5000    0.0000 C   0  0  0  0  0  0  0  0  0  0  0  0
    2.5981   -1.5000    0.0000 O   0  0  0  0  0  0  0  0  0  0  0  0
    1.7321    0.0000    0.0000 C   0  0  0  0  0  0  0  0  0  0  0  0
    0.8660   -0.5000    0.0000 C   0  0  0  0  0  0  0  0  0  0  0  0
    0.8660   -1.5000    0.0000 O   0  0  0  0  0  0  0  0  0  0  0  0
    0.0000   -0.0000    0.0000 C   0  0  0  0  0  0  0  0  0  0  0  0
   -0.8660   -0.5000    0.0000 C   0  0  0  0  0  0  0  0  0  0  0  0
   -0.8660   -1.5000    0.0000 O   0  0  0  0  0  0  0  0  0  0  0  0
   -1.7321   -0.0000    0.0000 C   0  0  0  0  0  0  0  0  0  0  0  0
   -1.7321    1.0000    0.0000 C   0  0  0  0  0  0  0  0  0  0  0  0
   -0.8660    1.5000    0.0000 C   0  0  0  0  0  0  0  0  0  0  0  0
   -0.0000    1.0000    0.0000 C   0  0  0  0  0  0  0  0  0  0  0  0
    0.8660    1.5000    0.0000 C   0  0  0  0  0  0  0  0  0  0  0  0
    1.3660    2.3660    0.0000 C   0  0  0  0  0  0  0  0  0  0  0  0
    0.3660    2.3660    0.0000 O   0  0  0  0  0  0  0  0  0  0  0  0
    1.7321    1.0000    0.0000 C   0  0  0  0  0  0  0  0  0  0  0  0
    2.5981    1.5000    0.0000 C   0  0  0  0  0  0  0  0  0  0  0  0
    3.4641    1.0000    0.0000 C   0  0  0  0  0  0  0  0  0  0  0  0
  1  2  1  0
  2  3  1  0
  2  4  1  0
  4  5  1  0
  5  6  1  0
  5  7  2  0
  7  8  1  0
  7 11  1  0
  8  9  1  0
  8 10  2  0
 11 12  2  0
 11 13  1  0
 13 14  1  0
 13 15  1  0
 15 16  1  0
 15 17  2  0
 17 18  1  0
 18 19  2  0
 18 20  1  0
 20 21  2  0
 21 22  1  0
 21 23  1  0
 23 24  2  0
 24 25  1  0
 25 26  2  0
 26 27  1  0
 26 20  1  0
 27 28  1  0
 27 29  1  0
 27 30  1  0
 30 31  1  0
 30 17  1  0
 31 32  1  0
 32  4  1  0
 32 13  1  0
M  END
>  <group_A>  (226) 
1

>  <group_B>  (226) 
0

>  <group_C>  (226) 
0

>  <group_D>  (226) 
1

>  <group_G>  (226) 
0

>  <group_H>  (226) 
0

>  <group_J>  (226) 
1

>  <group_L>  (226) 
0

>  <group_M>  (226) 
0

>  <group_N>  (226) 
0

>  <group_P>  (226) 
0

>  <group_R>  (226) 
0

>  <group_S>  (226) 
1

>  <group_V>  (226) 
0

$$$$

     RDKit          2D

 14 15  0  0  0  0  0  0  0  0999 V2000
   -2.5388   -0.5000    0.0000 C   0  0  0  0  0  0  0  0  0  0  0  0
   -1.5388   -0.5000    0.0000 C   0  0  0  0  0  0  0  0  0  0  0  0
   -0.9511    0.3090    0.0000 N   0  0  0  0  0  0  0  0  0  0  0  0
    0.0000    0.0000    0.0000 C   0  0  0  0  0  0  0  0  0  0  0  0
    0.0000   -1.0000    0.0000 C   0  0  0  0  0  0  0  0  0  0  0  0
    0.8660   -1.5000    0.0000 O   0  0  0  0  0  0  0  0  0  0  0  0
    1.7321   -1.0000    0.0000 C   0  0  0  0  0  0  0  0  0  0  0  0
    2.5981   -1.5000    0.0000 C   0  0  0  0  0  0  0  0  0  0  0  0
    2.5981   -2.5000    0.0000 O   0  0  0  0  0  0  0  0  0  0  0  0
    1.7321    0.0000    0.0000 C   0  0  0  0  0  0  0  0  0  0  0  0
    2.5981    0.5000    0.0000 O   0  0  0  0  0  0  0  0  0  0  0  0
    0.8660    0.5000    0.0000 C   0  0  0  0  0  0  0  0  0  0  0  0
    0.8660    1.5000    0.0000 O   0  0  0  0  0  0  0  0  0  0  0  0
   -0.9511   -1.3090    0.0000 S   0  0  0  0  0  0  0  0  0  0  0  0
  1  2  1  0
  2  3  2  0
  3  4  1  0
  4  5  1  0
  5  6  1  0
  5 14  1  0
  6  7  1  0
  7  8  1  0
  7 10  1  0
  8  9  1  0
 10 11  1  0
 10 12  1  0
 12 13  1  0
 12  4  1  0
 14  2  1  0
M  END
>  <group_A>  (227) 
1

>  <group_B>  (227) 
1

>  <group_C>  (227) 
1

>  <group_D>  (227) 
0

>  <group_G>  (227) 
0

>  <group_H>  (227) 
0

>  <group_J>  (227) 
0

>  <group_L>  (227) 
0

>  <group_M>  (227) 
0

>  <group_N>  (227) 
0

>  <group_P>  (227) 
0

>  <group_R>  (227) 
0

>  <group_S>  (227) 
0

>  <group_V>  (227) 
1

$$$$

     RDKit          2D

 12 12  0  0  0  0  0  0  0  0999 V2000
    3.3457   -3.1315    0.0000 O   0  0  0  0  0  0  0  0  0  0  0  0
    3.7524   -2.2180    0.0000 C   0  0  0  0  0  0  0  0  0  0  0  0
    4.7469   -2.1135    0.0000 O   0  0  0  0  0  0  0  0  0  0  0  0
    3.1646   -1.4090    0.0000 C   0  0  0  0  0  0  0  0  0  0  0  0
    2.1701   -1.5135    0.0000 C   0  0  0  0  0  0  0  0  0  0  0  0
    1.5823   -0.7045    0.0000 C   0  0  0  0  0  0  0  0  0  0  0  0
    0.5878   -0.8090    0.0000 C   0  0  0  0  0  0  0  0  0  0  0  0
    0.0000    0.0000    0.0000 C   0  0  0  0  0  0  0  0  0  0  0  0
   -1.0000   -0.0000    0.0000 C   0  0  0  0  0  0  0  0  0  0  0  0
   -1.3090    0.9511    0.0000 C   0  0  0  0  0  0  0  0  0  0  0  0
   -0.5000    1.5388    0.0000 S   0  0  0  0  0  0  0  0  0  0  0  0
    0.3090    0.9511    0.0000 S   0  0  0  0  0  0  0  0  0  0  0  0
  1  2  2  0
  2  3  1  0
  2  4  1  0
  4  5  1  0
  5  6  1  0
  6  7  1  0
  7  8  1  0
  8  9  1  0
  9 10  1  0
 10 11  1  0
 11 12  1  0
 12  8  1  0
M  END
>  <group_A>  (228) 
1

>  <group_B>  (228) 
0

>  <group_C>  (228) 
0

>  <group_D>  (228) 
0

>  <group_G>  (228) 
0

>  <group_H>  (228) 
0

>  <group_J>  (228) 
0

>  <group_L>  (228) 
0

>  <group_M>  (228) 
0

>  <group_N>  (228) 
0

>  <group_P>  (228) 
0

>  <group_R>  (228) 
0

>  <group_S>  (228) 
0

>  <group_V>  (228) 
0

$$$$

     RDKit          2D

 11 10  0  0  0  0  0  0  0  0999 V2000
   -1.7321    1.0000    0.0000 N   0  0  0  0  0  0  0  0  0  0  0  0
   -1.7321   -0.0000    0.0000 C   0  0  0  0  0  0  0  0  0  0  0  0
   -2.5981   -0.5000    0.0000 C   0  0  0  0  0  0  0  0  0  0  0  0
   -2.5981   -1.5000    0.0000 S   0  0  0  0  0  0  0  0  0  0  0  0
   -3.4641   -2.0000    0.0000 S   0  0  0  0  0  0  0  0  0  0  0  0
   -4.3301   -1.5000    0.0000 C   0  0  0  0  0  0  0  0  0  0  0  0
   -5.1962   -2.0000    0.0000 C   0  0  0  0  0  0  0  0  0  0  0  0
   -6.0622   -1.5000    0.0000 O   0  0  0  0  0  0  0  0  0  0  0  0
   -0.8660   -0.5000    0.0000 C   0  0  0  0  0  0  0  0  0  0  0  0
   -0.8660   -1.5000    0.0000 O   0  0  0  0  0  0  0  0  0  0  0  0
    0.0000   -0.0000    0.0000 O   0  0  0  0  0  0  0  0  0  0  0  0
  1  2  1  0
  2  3  1  0
  2  9  1  0
  3  4  1  0
  4  5  1  0
  5  6  1  0
  6  7  1  0
  7  8  1  0
  9 10  2  0
  9 11  1  0
M  END
>  <group_A>  (229) 
1

>  <group_B>  (229) 
1

>  <group_C>  (229) 
1

>  <group_D>  (229) 
0

>  <group_G>  (229) 
1

>  <group_H>  (229) 
0

>  <group_J>  (229) 
0

>  <group_L>  (229) 
1

>  <group_M>  (229) 
1

>  <group_N>  (229) 
0

>  <group_P>  (229) 
0

>  <group_R>  (229) 
0

>  <group_S>  (229) 
1

>  <group_V>  (229) 
1

$$$$

     RDKit          2D

  5  4  0  0  0  0  0  0  0  0999 V2000
    1.7321   -1.0000    0.0000 C   0  0  0  0  0  0  0  0  0  0  0  0
    1.7321   -0.0000    0.0000 C   0  0  0  0  0  0  0  0  0  0  0  0
    2.5981    0.5000    0.0000 O   0  0  0  0  0  0  0  0  0  0  0  0
    0.8660    0.5000    0.0000 C   0  0  0  0  0  0  0  0  0  0  0  0
    0.0000    0.0000    0.0000 O   0  0  0  0  0  0  0  0  0  0  0  0
  1  2  1  0
  2  3  1  0
  2  4  1  0
  4  5  1  0
M  END
>  <group_A>  (230) 
1

>  <group_B>  (230) 
0

>  <group_C>  (230) 
0

>  <group_D>  (230) 
0

>  <group_G>  (230) 
1

>  <group_H>  (230) 
0

>  <group_J>  (230) 
0

>  <group_L>  (230) 
0

>  <group_M>  (230) 
1

>  <group_N>  (230) 
0

>  <group_P>  (230) 
0

>  <group_R>  (230) 
0

>  <group_S>  (230) 
1

>  <group_V>  (230) 
0

$$$$

     RDKit          2D

  5  4  0  0  0  0  0  0  0  0999 V2000
    1.7321   -1.0000    0.0000 C   0  0  0  0  0  0  0  0  0  0  0  0
    1.7321   -0.0000    0.0000 C   0  0  0  0  0  0  0  0  0  0  0  0
    2.5981    0.5000    0.0000 O   0  0  0  0  0  0  0  0  0  0  0  0
    0.8660    0.5000    0.0000 C   0  0  0  0  0  0  0  0  0  0  0  0
    0.0000    0.0000    0.0000 O   0  0  0  0  0  0  0  0  0  0  0  0
  1  2  1  0
  2  3  1  0
  2  4  1  0
  4  5  1  0
M  END
>  <group_A>  (231) 
1

>  <group_B>  (231) 
0

>  <group_C>  (231) 
0

>  <group_D>  (231) 
0

>  <group_G>  (231) 
1

>  <group_H>  (231) 
0

>  <group_J>  (231) 
0

>  <group_L>  (231) 
0

>  <group_M>  (231) 
0

>  <group_N>  (231) 
0

>  <group_P>  (231) 
0

>  <group_R>  (231) 
0

>  <group_S>  (231) 
1

>  <group_V>  (231) 
0

$$$$

     RDKit          2D

 14 13  0  0  0  0  0  0  0  0999 V2000
    8.6603    0.0000    0.0000 C   0  0  0  0  0  0  0  0  0  0  0  0
    8.6603    1.0000    0.0000 C   0  0  0  0  0  0  0  0  0  0  0  0
    7.7942    1.5000    0.0000 C   0  0  0  0  0  0  0  0  0  0  0  0
    6.9282    1.0000    0.0000 C   0  0  0  0  0  0  0  0  0  0  0  0
    6.0622    1.5000    0.0000 C   0  0  0  0  0  0  0  0  0  0  0  0
    5.1962    1.0000    0.0000 C   0  0  0  0  0  0  0  0  0  0  0  0
    4.3301    1.5000    0.0000 C   0  0  0  0  0  0  0  0  0  0  0  0
    3.4641    1.0000    0.0000 C   0  0  0  0  0  0  0  0  0  0  0  0
    2.5981    1.5000    0.0000 C   0  0  0  0  0  0  0  0  0  0  0  0
    1.7321    1.0000    0.0000 C   0  0  0  0  0  0  0  0  0  0  0  0
    0.8660    1.5000    0.0000 C   0  0  0  0  0  0  0  0  0  0  0  0
    0.0000    1.0000    0.0000 C   0  0  0  0  0  0  0  0  0  0  0  0
   -0.8660    1.5000    0.0000 O   0  0  0  0  0  0  0  0  0  0  0  0
   -0.0000   -0.0000    0.0000 O   0  0  0  0  0  0  0  0  0  0  0  0
  1  2  1  0
  2  3  1  0
  3  4  1  0
  4  5  1  0
  5  6  1  0
  6  7  1  0
  7  8  1  0
  8  9  1  0
  9 10  1  0
 10 11  1  0
 11 12  1  0
 12 13  2  0
 12 14  1  0
M  END
>  <group_A>  (232) 
1

>  <group_B>  (232) 
1

>  <group_C>  (232) 
1

>  <group_D>  (232) 
0

>  <group_G>  (232) 
1

>  <group_H>  (232) 
0

>  <group_J>  (232) 
0

>  <group_L>  (232) 
0

>  <group_M>  (232) 
1

>  <group_N>  (232) 
0

>  <group_P>  (232) 
0

>  <group_R>  (232) 
0

>  <group_S>  (232) 
1

>  <group_V>  (232) 
1

$$$$

     RDKit          2D

  8  7  0  0  0  0  0  0  0  0999 V2000
    3.4641   -1.0000    0.0000 C   0  0  0  0  0  0  0  0  0  0  0  0
    3.4641    0.0000    0.0000 C   0  0  0  0  0  0  0  0  0  0  0  0
    4.3301    0.5000    0.0000 C   0  0  0  0  0  0  0  0  0  0  0  0
    2.5981    0.5000    0.0000 C   0  0  0  0  0  0  0  0  0  0  0  0
    1.7321    0.0000    0.0000 C   0  0  0  0  0  0  0  0  0  0  0  0
    0.8660    0.5000    0.0000 C   0  0  0  0  0  0  0  0  0  0  0  0
    0.8660    1.5000    0.0000 O   0  0  0  0  0  0  0  0  0  0  0  0
   -0.0000   -0.0000    0.0000 O   0  0  0  0  0  0  0  0  0  0  0  0
  1  2  1  0
  2  3  1  0
  2  4  1  0
  4  5  1  0
  5  6  1  0
  6  7  2  0
  6  8  1  0
M  END
>  <group_A>  (233) 
1

>  <group_B>  (233) 
0

>  <group_C>  (233) 
0

>  <group_D>  (233) 
0

>  <group_G>  (233) 
0

>  <group_H>  (233) 
0

>  <group_J>  (233) 
0

>  <group_L>  (233) 
0

>  <group_M>  (233) 
0

>  <group_N>  (233) 
0

>  <group_P>  (233) 
0

>  <group_R>  (233) 
0

>  <group_S>  (233) 
0

>  <group_V>  (233) 
0

$$$$

     RDKit          2D

  3  2  0  0  0  0  0  0  0  0999 V2000
    1.7321   -0.0000    0.0000 C   0  0  0  0  0  0  0  0  0  0  0  0
    0.8660    0.5000    0.0000 C   0  0  0  0  0  0  0  0  0  0  0  0
   -0.0000   -0.0000    0.0000 O   0  0  0  0  0  0  0  0  0  0  0  0
  1  2  1  0
  2  3  1  0
M  END
>  <group_A>  (234) 
1

>  <group_B>  (234) 
1

>  <group_C>  (234) 
1

>  <group_D>  (234) 
1

>  <group_G>  (234) 
1

>  <group_H>  (234) 
0

>  <group_J>  (234) 
1

>  <group_L>  (234) 
0

>  <group_M>  (234) 
1

>  <group_N>  (234) 
0

>  <group_P>  (234) 
0

>  <group_R>  (234) 
0

>  <group_S>  (234) 
1

>  <group_V>  (234) 
1

$$$$

     RDKit          2D

  1  0  0  0  0  0  0  0  0  0999 V2000
    1.0000    0.0000    0.0000 N   0  0  0  0  0  0  0  0  0  0  0  0
M  CHG  1   1   1
M  END
>  <group_A>  (235) 
1

>  <group_B>  (235) 
1

>  <group_C>  (235) 
1

>  <group_D>  (235) 
0

>  <group_G>  (235) 
1

>  <group_H>  (235) 
0

>  <group_J>  (235) 
1

>  <group_L>  (235) 
0

>  <group_M>  (235) 
1

>  <group_N>  (235) 
0

>  <group_P>  (235) 
0

>  <group_R>  (235) 
0

>  <group_S>  (235) 
1

>  <group_V>  (235) 
1

$$$$

     RDKit          2D

 37 41  0  0  0  0  0  0  0  0999 V2000
   -7.9690    0.4262    0.0000 N   0  0  0  0  0  0  0  0  0  0  0  0
   -7.3812   -0.3828    0.0000 C   0  0  0  0  0  0  0  0  0  0  0  0
   -7.7880   -1.2963    0.0000 N   0  0  0  0  0  0  0  0  0  0  0  0
   -7.2002   -2.1053    0.0000 C   0  0  0  0  0  0  0  0  0  0  0  0
   -6.2057   -2.0008    0.0000 N   0  0  0  0  0  0  0  0  0  0  0  0
   -5.7989   -1.0873    0.0000 C   0  0  0  0  0  0  0  0  0  0  0  0
   -6.3867   -0.2782    0.0000 C   0  0  0  0  0  0  0  0  0  0  0  0
   -5.7989    0.5308    0.0000 N   0  0  0  0  0  0  0  0  0  0  0  0
   -4.8479    0.2218    0.0000 C   0  0  0  0  0  0  0  0  0  0  0  0
   -4.8479   -0.7782    0.0000 N   0  0  0  0  0  0  0  0  0  0  0  0
   -4.0388   -1.3660    0.0000 C   0  0  0  0  0  0  0  0  0  0  0  0
   -3.0878   -1.0570    0.0000 O   0  0  0  0  0  0  0  0  0  0  0  0
   -2.5000   -1.8660    0.0000 C   0  0  0  0  0  0  0  0  0  0  0  0
   -1.5000   -1.8660    0.0000 C   0  0  0  0  0  0  0  0  0  0  0  0
   -1.0000   -1.0000    0.0000 O   0  0  0  0  0  0  0  0  0  0  0  0
    0.0000   -1.0000    0.0000 P   0  0  0  0  0  0  0  0  0  0  0  0
    0.0000   -2.0000    0.0000 O   0  0  0  0  0  0  0  0  0  0  0  0
    1.0000   -1.0000    0.0000 O   0  0  0  0  0  0  0  0  0  0  0  0
    0.0000    0.0000    0.0000 O   0  0  0  0  0  0  0  0  0  0  0  0
    0.8660    0.5000    0.0000 C   0  0  0  0  0  0  0  0  0  0  0  0
    1.7321    0.0000    0.0000 O   0  0  0  0  0  0  0  0  0  0  0  0
    0.8660    1.5000    0.0000 C   0  0  0  0  0  0  0  0  0  0  0  0
    1.7321    2.0000    0.0000 N   0  0  0  0  0  0  0  0  0  0  0  0
   -0.0000    2.0000    0.0000 C   0  0  0  0  0  0  0  0  0  0  0  0
   -0.8660    1.5000    0.0000 C   0  0  0  0  0  0  0  0  0  0  0  0
   -0.9706    0.5055    0.0000 C   0  0  0  0  0  0  0  0  0  0  0  0
   -1.9487    0.2976    0.0000 N   0  0  0  0  0  0  0  0  0  0  0  0
   -2.4487    1.1636    0.0000 C   0  0  0  0  0  0  0  0  0  0  0  0
   -3.4268    1.3715    0.0000 C   0  0  0  0  0  0  0  0  0  0  0  0
   -3.7359    2.3226    0.0000 C   0  0  0  0  0  0  0  0  0  0  0  0
   -3.0667    3.0657    0.0000 C   0  0  0  0  0  0  0  0  0  0  0  0
   -2.0886    2.8578    0.0000 C   0  0  0  0  0  0  0  0  0  0  0  0
   -1.7796    1.9067    0.0000 C   0  0  0  0  0  0  0  0  0  0  0  0
   -3.0878   -2.6750    0.0000 C   0  0  0  0  0  0  0  0  0  0  0  0
   -2.7788   -3.6261    0.0000 O   0  0  0  0  0  0  0  0  0  0  0  0
   -4.0388   -2.3660    0.0000 C   0  0  0  0  0  0  0  0  0  0  0  0
   -4.8479   -2.9538    0.0000 O   0  0  0  0  0  0  0  0  0  0  0  0
  1  2  1  0
  2  3  2  0
  3  4  1  0
  4  5  2  0
  5  6  1  0
  6  7  2  0
  7  8  1  0
  7  2  1  0
  8  9  2  0
  9 10  1  0
 10 11  1  0
 10  6  1  0
 11 12  1  0
 12 13  1  0
 13 14  1  0
 13 34  1  0
 14 15  1  0
 15 16  1  0
 16 17  2  0
 16 18  1  0
 16 19  1  0
 19 20  1  0
 20 21  2  0
 20 22  1  0
 22 23  1  0
 22 24  1  0
 24 25  1  0
 25 26  2  0
 26 27  1  0
 27 28  1  0
 28 29  2  0
 29 30  1  0
 30 31  2  0
 31 32  1  0
 32 33  2  0
 33 25  1  0
 33 28  1  0
 34 35  1  0
 34 36  1  0
 36 37  1  0
 36 11  1  0
M  END
>  <group_A>  (236) 
1

>  <group_B>  (236) 
0

>  <group_C>  (236) 
0

>  <group_D>  (236) 
0

>  <group_G>  (236) 
0

>  <group_H>  (236) 
0

>  <group_J>  (236) 
0

>  <group_L>  (236) 
0

>  <group_M>  (236) 
0

>  <group_N>  (236) 
0

>  <group_P>  (236) 
0

>  <group_R>  (236) 
0

>  <group_S>  (236) 
0

>  <group_V>  (236) 
0

$$$$

     RDKit          2D

 10  9  0  0  0  0  0  0  0  0999 V2000
    3.4641    0.0000    0.0000 C   0  0  0  0  0  0  0  0  0  0  0  0
    3.4641    1.0000    0.0000 As  0  0  0  0  0  3  0  0  0  0  0  0
    4.3301    1.5000    0.0000 C   0  0  0  0  0  0  0  0  0  0  0  0
    2.5981    1.5000    0.0000 S   0  0  0  0  0  0  0  0  0  0  0  0
    1.7321    1.0000    0.0000 C   0  0  0  0  0  0  0  0  0  0  0  0
    0.8660    1.5000    0.0000 C   0  0  0  0  0  0  0  0  0  0  0  0
    0.8660    2.5000    0.0000 N   0  0  0  0  0  0  0  0  0  0  0  0
   -0.0000    1.0000    0.0000 C   0  0  0  0  0  0  0  0  0  0  0  0
   -0.8660    1.5000    0.0000 O   0  0  0  0  0  0  0  0  0  0  0  0
   -0.0000   -0.0000    0.0000 O   0  0  0  0  0  0  0  0  0  0  0  0
  1  2  1  0
  2  3  1  0
  2  4  1  0
  4  5  1  0
  5  6  1  0
  6  7  1  0
  6  8  1  0
  8  9  2  0
  8 10  1  0
M  END
>  <group_A>  (237) 
1

>  <group_B>  (237) 
1

>  <group_C>  (237) 
0

>  <group_D>  (237) 
0

>  <group_G>  (237) 
1

>  <group_H>  (237) 
1

>  <group_J>  (237) 
0

>  <group_L>  (237) 
0

>  <group_M>  (237) 
1

>  <group_N>  (237) 
0

>  <group_P>  (237) 
0

>  <group_R>  (237) 
0

>  <group_S>  (237) 
1

>  <group_V>  (237) 
1

$$$$

     RDKit          2D

 22 23  0  0  0  0  0  0  0  0999 V2000
   -5.4478    3.5306    0.0000 C   0  0  0  0  0  0  0  0  0  0  0  0
   -5.5523    2.5361    0.0000 C   0  0  0  0  0  0  0  0  0  0  0  0
   -4.7433    1.9483    0.0000 C   0  0  0  0  0  0  0  0  0  0  0  0
   -4.8479    0.9538    0.0000 N   0  0  0  0  0  0  0  0  0  0  0  0
   -4.0388    0.3660    0.0000 C   0  0  0  0  0  0  0  0  0  0  0  0
   -3.0878    0.6750    0.0000 O   0  0  0  0  0  0  0  0  0  0  0  0
   -2.5000   -0.1340    0.0000 C   0  0  0  0  0  0  0  0  0  0  0  0
   -1.5000   -0.1340    0.0000 C   0  0  0  0  0  0  0  0  0  0  0  0
   -1.0000   -1.0000    0.0000 O   0  0  0  0  0  0  0  0  0  0  0  0
    0.0000   -1.0000    0.0000 P   0  0  0  0  0  0  0  0  0  0  0  0
   -0.0000   -2.0000    0.0000 O   0  0  0  0  0  0  0  0  0  0  0  0
    1.0000   -1.0000    0.0000 O   0  0  0  0  0  0  0  0  0  0  0  0
    0.0000   -0.0000    0.0000 O   0  0  0  0  0  0  0  0  0  0  0  0
   -3.0878   -0.9430    0.0000 C   0  0  0  0  0  0  0  0  0  0  0  0
   -2.7788   -1.8940    0.0000 O   0  0  0  0  0  0  0  0  0  0  0  0
   -4.0388   -0.6340    0.0000 C   0  0  0  0  0  0  0  0  0  0  0  0
   -4.8479   -1.2218    0.0000 O   0  0  0  0  0  0  0  0  0  0  0  0
   -5.7614    0.5471    0.0000 C   0  0  0  0  0  0  0  0  0  0  0  0
   -5.8659   -0.4474    0.0000 O   0  0  0  0  0  0  0  0  0  0  0  0
   -6.5704    1.1349    0.0000 N   0  0  0  0  0  0  0  0  0  0  0  0
   -6.4659    2.1294    0.0000 C   0  0  0  0  0  0  0  0  0  0  0  0
   -7.2749    2.7172    0.0000 O   0  0  0  0  0  0  0  0  0  0  0  0
  1  2  1  0
  2  3  2  0
  3  4  1  0
  4  5  1  0
  4 18  1  0
  5  6  1  0
  6  7  1  0
  7  8  1  0
  7 14  1  0
  8  9  1  0
  9 10  1  0
 10 11  2  0
 10 12  1  0
 10 13  1  0
 14 15  1  0
 14 16  1  0
 16 17  1  0
 16  5  1  0
 18 19  2  0
 18 20  1  0
 20 21  1  0
 21 22  2  0
 21  2  1  0
M  END
>  <group_A>  (238) 
1

>  <group_B>  (238) 
1

>  <group_C>  (238) 
0

>  <group_D>  (238) 
1

>  <group_G>  (238) 
0

>  <group_H>  (238) 
0

>  <group_J>  (238) 
1

>  <group_L>  (238) 
0

>  <group_M>  (238) 
0

>  <group_N>  (238) 
1

>  <group_P>  (238) 
0

>  <group_R>  (238) 
0

>  <group_S>  (238) 
1

>  <group_V>  (238) 
1

$$$$

     RDKit          2D

  4  3  0  0  0  0  0  0  0  0999 V2000
    1.7321   -0.0000    0.0000 O   0  0  0  0  0  0  0  0  0  0  0  0
    0.8660    0.5000    0.0000 C   0  0  0  0  0  0  0  0  0  0  0  0
    0.8660    1.5000    0.0000 O   0  0  0  0  0  0  0  0  0  0  0  0
   -0.0000   -0.0000    0.0000 O   0  0  0  0  0  0  0  0  0  0  0  0
  1  2  2  0
  2  3  1  0
  2  4  1  0
M  CHG  2   3  -1   4  -1
M  END
>  <group_A>  (239) 
1

>  <group_B>  (239) 
1

>  <group_C>  (239) 
1

>  <group_D>  (239) 
1

>  <group_G>  (239) 
1

>  <group_H>  (239) 
0

>  <group_J>  (239) 
0

>  <group_L>  (239) 
0

>  <group_M>  (239) 
1

>  <group_N>  (239) 
1

>  <group_P>  (239) 
0

>  <group_R>  (239) 
1

>  <group_S>  (239) 
1

>  <group_V>  (239) 
1

$$$$

     RDKit          2D

 18 19  0  0  0  0  0  0  0  0999 V2000
    4.3301   -1.5000    0.0000 C   0  0  0  0  0  0  0  0  0  0  0  0
    3.4641   -1.0000    0.0000 C   0  0  0  0  0  0  0  0  0  0  0  0
    2.5981   -1.5000    0.0000 N   0  0  0  0  0  0  0  0  0  0  0  0
    1.7321   -1.0000    0.0000 C   0  0  0  0  0  0  0  0  0  0  0  0
    1.7321   -0.0000    0.0000 C   0  0  0  0  0  0  0  0  0  0  0  0
    0.8660    0.5000    0.0000 C   0  0  0  0  0  0  0  0  0  0  0  0
   -0.0000   -0.0000    0.0000 N   0  0  0  0  0  0  0  0  0  0  0  0
   -0.1045   -0.9945    0.0000 C   0  0  0  0  0  0  0  0  0  0  0  0
   -1.0827   -1.2024    0.0000 S   0  0  0  0  0  0  0  0  0  0  0  0
   -1.5827   -0.3364    0.0000 C   0  0  0  0  0  0  0  0  0  0  0  0
   -2.5772   -0.2319    0.0000 C   0  0  0  0  0  0  0  0  0  0  0  0
   -3.1650   -1.0409    0.0000 C   0  0  0  0  0  0  0  0  0  0  0  0
   -4.1595   -0.9364    0.0000 O   0  0  0  0  0  0  0  0  0  0  0  0
   -0.9135    0.4067    0.0000 C   0  0  0  0  0  0  0  0  0  0  0  0
   -1.1215    1.3849    0.0000 C   0  0  0  0  0  0  0  0  0  0  0  0
    2.5981    0.5000    0.0000 C   0  0  0  0  0  0  0  0  0  0  0  0
    2.5981    1.5000    0.0000 N   0  0  0  0  0  0  0  0  0  0  0  0
    3.4641   -0.0000    0.0000 N   0  0  0  0  0  0  0  0  0  0  0  0
  1  2  1  0
  2  3  2  0
  3  4  1  0
  4  5  2  0
  5  6  1  0
  5 16  1  0
  6  7  1  0
  7  8  2  0
  8  9  1  0
  9 10  1  0
 10 11  1  0
 10 14  2  0
 11 12  1  0
 12 13  1  0
 14 15  1  0
 14  7  1  0
 16 17  1  0
 16 18  2  0
 18  2  1  0
M  CHG  1   7   1
M  END
>  <group_A>  (240) 
1

>  <group_B>  (240) 
0

>  <group_C>  (240) 
0

>  <group_D>  (240) 
0

>  <group_G>  (240) 
0

>  <group_H>  (240) 
0

>  <group_J>  (240) 
0

>  <group_L>  (240) 
0

>  <group_M>  (240) 
0

>  <group_N>  (240) 
0

>  <group_P>  (240) 
0

>  <group_R>  (240) 
0

>  <group_S>  (240) 
0

>  <group_V>  (240) 
0

$$$$

     RDKit          2D

 21 20  0  0  0  0  0  0  0  0999 V2000
    2.7321    4.0000    0.0000 O   0  0  0  0  0  0  0  0  0  0  0  0
    1.8660    3.5000    0.0000 C   0  0  0  0  0  0  0  0  0  0  0  0
    1.0000    4.0000    0.0000 O   0  0  0  0  0  0  0  0  0  0  0  0
    1.8660    2.5000    0.0000 C   0  0  0  0  0  0  0  0  0  0  0  0
    0.8660    2.5000    0.0000 O   0  0  0  0  0  0  0  0  0  0  0  0
    1.8660    1.5000    0.0000 C   0  0  0  0  0  0  0  0  0  0  0  0
    1.0000    1.0000    0.0000 O   0  0  0  0  0  0  0  0  0  0  0  0
    1.0000   -0.0000    0.0000 P   0  0  0  0  0  0  0  0  0  0  0  0
    2.0000   -0.0000    0.0000 O   0  0  0  0  0  0  0  0  0  0  0  0
    1.0000   -1.0000    0.0000 O   0  0  0  0  0  0  0  0  0  0  0  0
    0.0000   -0.0000    0.0000 O   0  0  0  0  0  0  0  0  0  0  0  0
    2.8660    2.5000    0.0000 C   0  0  0  0  0  0  0  0  0  0  0  0
    3.3660    3.3660    0.0000 O   0  0  0  0  0  0  0  0  0  0  0  0
    3.3660    1.6340    0.0000 C   0  0  0  0  0  0  0  0  0  0  0  0
    2.8660    0.7679    0.0000 O   0  0  0  0  0  0  0  0  0  0  0  0
    4.3660    1.6340    0.0000 C   0  0  0  0  0  0  0  0  0  0  0  0
    4.8660    2.5000    0.0000 O   0  0  0  0  0  0  0  0  0  0  0  0
    4.3660    3.3660    0.0000 P   0  0  0  0  0  0  0  0  0  0  0  0
    5.2321    3.8660    0.0000 O   0  0  0  0  0  0  0  0  0  0  0  0
    3.8660    4.2321    0.0000 O   0  0  0  0  0  0  0  0  0  0  0  0
    3.5000    2.8660    0.0000 O   0  0  0  0  0  0  0  0  0  0  0  0
  1  2  2  0
  2  3  1  0
  2  4  1  0
  4  5  1  0
  4  6  1  0
  4 12  1  0
  6  7  1  0
  7  8  1  0
  8  9  2  0
  8 10  1  0
  8 11  1  0
 12 13  1  0
 12 14  1  0
 14 15  1  0
 14 16  1  0
 16 17  1  0
 17 18  1  0
 18 19  2  0
 18 20  1  0
 18 21  1  0
M  END
>  <group_A>  (241) 
1

>  <group_B>  (241) 
0

>  <group_C>  (241) 
0

>  <group_D>  (241) 
0

>  <group_G>  (241) 
0

>  <group_H>  (241) 
0

>  <group_J>  (241) 
0

>  <group_L>  (241) 
0

>  <group_M>  (241) 
0

>  <group_N>  (241) 
0

>  <group_P>  (241) 
0

>  <group_R>  (241) 
0

>  <group_S>  (241) 
0

>  <group_V>  (241) 
0

$$$$

     RDKit          2D

  9  9  0  0  0  0  0  0  0  0999 V2000
    0.1810   -1.7226    0.0000 O   0  0  0  0  0  0  0  0  0  0  0  0
    0.5878   -0.8090    0.0000 C   0  0  0  0  0  0  0  0  0  0  0  0
    1.5823   -0.7045    0.0000 O   0  0  0  0  0  0  0  0  0  0  0  0
    0.0000    0.0000    0.0000 C   0  0  0  0  0  0  0  0  0  0  0  0
   -1.0000    0.0000    0.0000 C   0  0  0  0  0  0  0  0  0  0  0  0
   -1.3090    0.9511    0.0000 C   0  0  0  0  0  0  0  0  0  0  0  0
   -2.2601    1.2601    0.0000 O   0  0  0  0  0  0  0  0  0  0  0  0
   -0.5000    1.5388    0.0000 C   0  0  0  0  0  0  0  0  0  0  0  0
    0.3090    0.9511    0.0000 N   0  0  0  0  0  0  0  0  0  0  0  0
  1  2  2  0
  2  3  1  0
  2  4  1  0
  4  5  1  0
  5  6  1  0
  6  7  1  0
  6  8  1  0
  8  9  1  0
  9  4  1  0
M  END
>  <group_A>  (242) 
1

>  <group_B>  (242) 
1

>  <group_C>  (242) 
1

>  <group_D>  (242) 
1

>  <group_G>  (242) 
1

>  <group_H>  (242) 
0

>  <group_J>  (242) 
0

>  <group_L>  (242) 
0

>  <group_M>  (242) 
0

>  <group_N>  (242) 
0

>  <group_P>  (242) 
0

>  <group_R>  (242) 
0

>  <group_S>  (242) 
1

>  <group_V>  (242) 
1

$$$$

     RDKit          2D

  7  7  0  0  0  0  0  0  0  0999 V2000
   -0.2588   -0.9659    0.0000 N   0  0  0  0  0  0  0  0  0  0  0  0
    0.0000    0.0000    0.0000 C   0  0  0  0  0  0  0  0  0  0  0  0
   -0.9968    0.0802    0.0000 C   0  0  0  0  0  0  0  0  0  0  0  0
   -1.4257    0.9836    0.0000 O   0  0  0  0  0  0  0  0  0  0  0  0
   -1.5646   -0.7429    0.0000 O   0  0  0  0  0  0  0  0  0  0  0  0
    0.5000    0.8660    0.0000 C   0  0  0  0  0  0  0  0  0  0  0  0
    1.0000   -0.0000    0.0000 C   0  0  0  0  0  0  0  0  0  0  0  0
  1  2  1  0
  2  3  1  0
  2  6  1  0
  3  4  2  0
  3  5  1  0
  6  7  1  0
  7  2  1  0
M  END
>  <group_A>  (243) 
1

>  <group_B>  (243) 
0

>  <group_C>  (243) 
0

>  <group_D>  (243) 
0

>  <group_G>  (243) 
0

>  <group_H>  (243) 
0

>  <group_J>  (243) 
0

>  <group_L>  (243) 
0

>  <group_M>  (243) 
0

>  <group_N>  (243) 
0

>  <group_P>  (243) 
0

>  <group_R>  (243) 
0

>  <group_S>  (243) 
0

>  <group_V>  (243) 
0

$$$$

     RDKit          2D

 36 38  0  0  0  0  0  0  0  0999 V2000
    7.2749    0.9851    0.0000 O   0  0  0  0  0  0  0  0  0  0  0  0
    6.4659    0.3973    0.0000 C   0  0  0  0  0  0  0  0  0  0  0  0
    5.5523    0.8041    0.0000 C   0  0  0  0  0  0  0  0  0  0  0  0
    4.7433    0.2163    0.0000 C   0  0  0  0  0  0  0  0  0  0  0  0
    4.8479   -0.7782    0.0000 N   0  0  0  0  0  0  0  0  0  0  0  0
    4.0388   -1.3660    0.0000 C   0  0  0  0  0  0  0  0  0  0  0  0
    3.0878   -1.0570    0.0000 O   0  0  0  0  0  0  0  0  0  0  0  0
    2.5000   -1.8660    0.0000 C   0  0  0  0  0  0  0  0  0  0  0  0
    1.5000   -1.8660    0.0000 C   0  0  0  0  0  0  0  0  0  0  0  0
    1.0000   -1.0000    0.0000 O   0  0  0  0  0  0  0  0  0  0  0  0
    0.0000   -1.0000    0.0000 P   0  0  0  0  0  0  0  0  0  0  0  0
   -0.0000   -2.0000    0.0000 O   0  0  0  0  0  0  0  0  0  0  0  0
   -1.0000   -1.0000    0.0000 O   0  0  0  0  0  0  0  0  0  0  0  0
   -0.0000   -0.0000    0.0000 O   0  0  0  0  0  0  0  0  0  0  0  0
   -0.0000    1.0000    0.0000 P   0  0  0  0  0  0  0  0  0  0  0  0
    1.0000    1.0000    0.0000 O   0  0  0  0  0  0  0  0  0  0  0  0
   -0.0000    2.0000    0.0000 O   0  0  0  0  0  0  0  0  0  0  0  0
   -1.0000    1.0000    0.0000 O   0  0  0  0  0  0  0  0  0  0  0  0
   -1.5000    1.8660    0.0000 C   0  0  0  0  0  0  0  0  0  0  0  0
   -1.0000    2.7321    0.0000 O   0  0  0  0  0  0  0  0  0  0  0  0
   -1.5000    3.5981    0.0000 C   0  0  0  0  0  0  0  0  0  0  0  0
   -1.0000    4.4641    0.0000 C   0  0  0  0  0  0  0  0  0  0  0  0
   -0.0000    4.4641    0.0000 O   0  0  0  0  0  0  0  0  0  0  0  0
   -2.5000    3.5981    0.0000 C   0  0  0  0  0  0  0  0  0  0  0  0
   -3.0000    4.4641    0.0000 O   0  0  0  0  0  0  0  0  0  0  0  0
   -3.0000    2.7321    0.0000 C   0  0  0  0  0  0  0  0  0  0  0  0
   -4.0000    2.7321    0.0000 O   0  0  0  0  0  0  0  0  0  0  0  0
   -2.5000    1.8660    0.0000 C   0  0  0  0  0  0  0  0  0  0  0  0
   -3.0000    1.0000    0.0000 O   0  0  0  0  0  0  0  0  0  0  0  0
    3.0878   -2.6750    0.0000 C   0  0  0  0  0  0  0  0  0  0  0  0
    2.7788   -3.6261    0.0000 O   0  0  0  0  0  0  0  0  0  0  0  0
    4.0388   -2.3660    0.0000 C   0  0  0  0  0  0  0  0  0  0  0  0
    4.8479   -2.9538    0.0000 O   0  0  0  0  0  0  0  0  0  0  0  0
    5.7614   -1.1850    0.0000 C   0  0  0  0  0  0  0  0  0  0  0  0
    5.8659   -2.1795    0.0000 O   0  0  0  0  0  0  0  0  0  0  0  0
    6.5704   -0.5972    0.0000 N   0  0  0  0  0  0  0  0  0  0  0  0
  1  2  2  0
  2  3  1  0
  3  4  2  0
  4  5  1  0
  5  6  1  0
  5 34  1  0
  6  7  1  0
  7  8  1  0
  8  9  1  0
  8 30  1  0
  9 10  1  0
 10 11  1  0
 11 12  2  0
 11 13  1  0
 11 14  1  0
 14 15  1  0
 15 16  2  0
 15 17  1  0
 15 18  1  0
 18 19  1  0
 19 20  1  0
 20 21  1  0
 21 22  1  0
 21 24  1  0
 22 23  1  0
 24 25  1  0
 24 26  1  0
 26 27  1  0
 26 28  1  0
 28 29  1  0
 28 19  1  0
 30 31  1  0
 30 32  1  0
 32 33  1  0
 32  6  1  0
 34 35  2  0
 34 36  1  0
 36  2  1  0
M  END
>  <group_A>  (244) 
1

>  <group_B>  (244) 
1

>  <group_C>  (244) 
1

>  <group_D>  (244) 
0

>  <group_G>  (244) 
1

>  <group_H>  (244) 
0

>  <group_J>  (244) 
0

>  <group_L>  (244) 
0

>  <group_M>  (244) 
0

>  <group_N>  (244) 
0

>  <group_P>  (244) 
0

>  <group_R>  (244) 
0

>  <group_S>  (244) 
1

>  <group_V>  (244) 
1

$$$$

     RDKit          2D

 52 54  0  0  0  0  0  0  0  0999 V2000
   -1.4850   -7.4705    0.0000 C   0  0  0  0  0  0  0  0  0  0  0  0
   -0.5234   -7.3984    0.0000 C   0  0  0  0  0  0  0  0  0  0  0  0
   -0.1050   -6.5296    0.0000 C   0  0  0  0  0  0  0  0  0  0  0  0
   -0.8589   -5.9284    0.0000 O   0  0  0  0  0  0  0  0  0  0  0  0
   -1.2773   -5.0596    0.0000 C   0  0  0  0  0  0  0  0  0  0  0  0
   -2.2174   -5.2742    0.0000 O   0  0  0  0  0  0  0  0  0  0  0  0
   -1.2773   -4.0953    0.0000 C   0  0  0  0  0  0  0  0  0  0  0  0
   -2.2174   -3.8807    0.0000 C   0  0  0  0  0  0  0  0  0  0  0  0
   -0.8589   -3.2265    0.0000 C   0  0  0  0  0  0  0  0  0  0  0  0
   -2.3667   -2.0241    0.0000 O   0  0  0  0  0  0  0  0  0  0  0  0
   -3.2644   -2.3764    0.0000 C   0  0  0  0  0  0  0  0  0  0  0  0
   -3.4081   -3.3299    0.0000 C   0  0  0  0  0  0  0  0  0  0  0  0
   -4.3057   -3.6822    0.0000 C   0  0  0  0  0  0  0  0  0  0  0  0
   -4.9069   -4.4361    0.0000 C   0  0  0  0  0  0  0  0  0  0  0  0
   -3.9534   -4.5798    0.0000 O   0  0  0  0  0  0  0  0  0  0  0  0
   -4.5546   -5.3337    0.0000 C   0  0  0  0  0  0  0  0  0  0  0  0
   -5.0596   -3.0809    0.0000 C   0  0  0  0  0  0  0  0  0  0  0  0
   -5.9573   -3.4332    0.0000 O   0  0  0  0  0  0  0  0  0  0  0  0
   -4.9159   -2.1274    0.0000 C   0  0  0  0  0  0  0  0  0  0  0  0
   -5.6698   -1.5262    0.0000 C   0  0  0  0  0  0  0  0  0  0  0  0
   -4.0183   -1.7751    0.0000 O   0  0  0  0  0  0  0  0  0  0  0  0
   -0.1050   -2.6253    0.0000 C   0  0  0  0  0  0  0  0  0  0  0  0
   -0.5234   -1.7565    0.0000 C   0  0  0  0  0  0  0  0  0  0  0  0
    0.8351   -2.4107    0.0000 C   0  0  0  0  0  0  0  0  0  0  0  0
    0.8351   -0.4821    0.0000 O   0  0  0  0  0  0  0  0  0  0  0  0
   -0.0000   -0.0000    0.0000 C   0  0  0  0  0  0  0  0  0  0  0  0
   -0.8351   -0.4821    0.0000 O   0  0  0  0  0  0  0  0  0  0  0  0
   -1.6702   -0.0000    0.0000 C   0  0  0  0  0  0  0  0  0  0  0  0
   -2.5053   -0.4821    0.0000 C   0  0  0  0  0  0  0  0  0  0  0  0
   -1.6702    0.9643    0.0000 C   0  0  0  0  0  0  0  0  0  0  0  0
   -0.8351    1.4464    0.0000 C   0  0  0  0  0  0  0  0  0  0  0  0
   -0.8351    2.4107    0.0000 N   0  0  0  0  0  0  0  0  0  0  0  0
   -0.0000    2.8929    0.0000 C   0  0  0  0  0  0  0  0  0  0  0  0
   -1.6702    2.8929    0.0000 C   0  0  0  0  0  0  0  0  0  0  0  0
    0.0000    0.9643    0.0000 C   0  0  0  0  0  0  0  0  0  0  0  0
    0.8351    1.4464    0.0000 O   0  0  0  0  0  0  0  0  0  0  0  0
    1.7752   -2.6253    0.0000 C   0  0  0  0  0  0  0  0  0  0  0  0
    2.5719   -2.0821    0.0000 C   0  0  0  0  0  0  0  0  0  0  0  0
    1.7031   -1.6637    0.0000 O   0  0  0  0  0  0  0  0  0  0  0  0
    2.4999   -1.1205    0.0000 C   0  0  0  0  0  0  0  0  0  0  0  0
    2.5291   -3.2265    0.0000 C   0  0  0  0  0  0  0  0  0  0  0  0
    2.9475   -4.0953    0.0000 C   0  0  0  0  0  0  0  0  0  0  0  0
    3.8876   -3.8807    0.0000 C   0  0  0  0  0  0  0  0  0  0  0  0
    2.9475   -5.0596    0.0000 C   0  0  0  0  0  0  0  0  0  0  0  0
    3.8876   -5.2742    0.0000 O   0  0  0  0  0  0  0  0  0  0  0  0
    2.5291   -5.9284    0.0000 C   0  0  0  0  0  0  0  0  0  0  0  0
    3.2830   -6.5296    0.0000 C   0  0  0  0  0  0  0  0  0  0  0  0
    1.7752   -6.5296    0.0000 C   0  0  0  0  0  0  0  0  0  0  0  0
    2.1936   -7.3984    0.0000 O   0  0  0  0  0  0  0  0  0  0  0  0
    0.8351   -6.7442    0.0000 C   0  0  0  0  0  0  0  0  0  0  0  0
    0.3530   -7.5793    0.0000 C   0  0  0  0  0  0  0  0  0  0  0  0
    1.3172   -7.5793    0.0000 O   0  0  0  0  0  0  0  0  0  0  0  0
  1  2  1  0
  2  3  1  0
  3  4  1  0
  4  5  1  0
  5  6  2  0
  5  7  1  0
  7  8  1  0
  7  9  1  0
  9 10  1  0
  9 22  1  0
 10 11  1  0
 11 12  1  0
 12 13  1  0
 13 14  1  0
 13 15  1  0
 13 17  1  0
 15 16  1  0
 17 18  1  0
 17 19  1  0
 19 20  1  0
 19 21  1  0
 21 11  1  0
 22 23  1  0
 22 24  1  0
 24 25  1  0
 24 37  1  0
 25 26  1  0
 26 27  1  0
 27 28  1  0
 28 29  1  0
 28 30  1  0
 30 31  1  0
 31 32  1  0
 31 35  1  0
 32 33  1  0
 32 34  1  0
 35 36  1  0
 35 26  1  0
 37 38  1  0
 37 39  1  0
 37 41  1  0
 39 40  1  0
 41 42  1  0
 42 43  1  0
 42 44  1  0
 44 45  2  0
 44 46  1  0
 46 47  1  0
 46 48  1  0
 48 49  1  0
 48 50  1  0
 50 51  1  0
 50 52  1  0
 50  3  1  0
M  END
>  <group_A>  (245) 
1

>  <group_B>  (245) 
0

>  <group_C>  (245) 
0

>  <group_D>  (245) 
0

>  <group_G>  (245) 
0

>  <group_H>  (245) 
0

>  <group_J>  (245) 
1

>  <group_L>  (245) 
0

>  <group_M>  (245) 
0

>  <group_N>  (245) 
0

>  <group_P>  (245) 
0

>  <group_R>  (245) 
0

>  <group_S>  (245) 
0

>  <group_V>  (245) 
0

$$$$

     RDKit          2D

 20 19  0  0  0  0  0  0  0  0999 V2000
   13.8564    0.0000    0.0000 C   0  0  0  0  0  0  0  0  0  0  0  0
   13.8564    1.0000    0.0000 C   0  0  0  0  0  0  0  0  0  0  0  0
   12.9904    1.5000    0.0000 C   0  0  0  0  0  0  0  0  0  0  0  0
   12.1244    1.0000    0.0000 C   0  0  0  0  0  0  0  0  0  0  0  0
   11.2583    1.5000    0.0000 C   0  0  0  0  0  0  0  0  0  0  0  0
   10.3923    1.0000    0.0000 C   0  0  0  0  0  0  0  0  0  0  0  0
    9.5263    1.5000    0.0000 C   0  0  0  0  0  0  0  0  0  0  0  0
    8.6603    1.0000    0.0000 C   0  0  0  0  0  0  0  0  0  0  0  0
    7.7942    1.5000    0.0000 C   0  0  0  0  0  0  0  0  0  0  0  0
    6.9282    1.0000    0.0000 C   0  0  0  0  0  0  0  0  0  0  0  0
    6.0622    1.5000    0.0000 C   0  0  0  0  0  0  0  0  0  0  0  0
    5.1962    1.0000    0.0000 C   0  0  0  0  0  0  0  0  0  0  0  0
    4.3301    1.5000    0.0000 C   0  0  0  0  0  0  0  0  0  0  0  0
    3.4641    1.0000    0.0000 C   0  0  0  0  0  0  0  0  0  0  0  0
    2.5981    1.5000    0.0000 C   0  0  0  0  0  0  0  0  0  0  0  0
    1.7321    1.0000    0.0000 C   0  0  0  0  0  0  0  0  0  0  0  0
    0.8660    1.5000    0.0000 C   0  0  0  0  0  0  0  0  0  0  0  0
   -0.0000    1.0000    0.0000 C   0  0  0  0  0  0  0  0  0  0  0  0
   -0.8660    1.5000    0.0000 O   0  0  0  0  0  0  0  0  0  0  0  0
   -0.0000   -0.0000    0.0000 O   0  0  0  0  0  0  0  0  0  0  0  0
  1  2  1  0
  2  3  1  0
  3  4  1  0
  4  5  1  0
  5  6  1  0
  6  7  1  0
  7  8  1  0
  8  9  1  0
  9 10  2  3
 10 11  1  0
 11 12  1  0
 12 13  1  0
 13 14  1  0
 14 15  1  0
 15 16  1  0
 16 17  1  0
 17 18  1  0
 18 19  2  0
 18 20  1  0
M  END
>  <group_A>  (246) 
1

>  <group_B>  (246) 
1

>  <group_C>  (246) 
1

>  <group_D>  (246) 
0

>  <group_G>  (246) 
0

>  <group_H>  (246) 
0

>  <group_J>  (246) 
0

>  <group_L>  (246) 
0

>  <group_M>  (246) 
0

>  <group_N>  (246) 
1

>  <group_P>  (246) 
0

>  <group_R>  (246) 
0

>  <group_S>  (246) 
0

>  <group_V>  (246) 
1

$$$$

     RDKit          2D

 29 31  0  0  0  0  0  0  0  0999 V2000
   -5.1962   -1.0000    0.0000 C   0  0  0  0  0  0  0  0  0  0  0  0
   -5.1962    0.0000    0.0000 C   0  0  0  0  0  0  0  0  0  0  0  0
   -6.0622    0.5000    0.0000 C   0  0  0  0  0  0  0  0  0  0  0  0
   -6.0622    1.5000    0.0000 C   0  0  0  0  0  0  0  0  0  0  0  0
   -5.1962    2.0000    0.0000 C   0  0  0  0  0  0  0  0  0  0  0  0
   -5.1962    3.0000    0.0000 O   0  0  0  0  0  0  0  0  0  0  0  0
   -4.3301    1.5000    0.0000 C   0  0  0  0  0  0  0  0  0  0  0  0
   -4.3301    0.5000    0.0000 C   0  0  0  0  0  0  0  0  0  0  0  0
   -3.4641    0.0000    0.0000 C   0  0  0  0  0  0  0  0  0  0  0  0
   -2.5981    0.5000    0.0000 C   0  0  0  0  0  0  0  0  0  0  0  0
   -1.7321    0.0000    0.0000 C   0  0  0  0  0  0  0  0  0  0  0  0
   -1.7321   -1.0000    0.0000 C   0  0  0  0  0  0  0  0  0  0  0  0
   -0.8660   -1.5000    0.0000 C   0  0  0  0  0  0  0  0  0  0  0  0
   -0.0000   -1.0000    0.0000 C   0  0  0  0  0  0  0  0  0  0  0  0
    0.0000    0.0000    0.0000 C   0  0  0  0  0  0  0  0  0  0  0  0
    0.5878   -0.8090    0.0000 C   0  0  0  0  0  0  0  0  0  0  0  0
   -0.8660    0.5000    0.0000 C   0  0  0  0  0  0  0  0  0  0  0  0
   -0.6581    1.4781    0.0000 C   0  0  0  0  0  0  0  0  0  0  0  0
    0.3364    1.5827    0.0000 C   0  0  0  0  0  0  0  0  0  0  0  0
    0.7431    0.6691    0.0000 C   0  0  0  0  0  0  0  0  0  0  0  0
    1.7213    0.4612    0.0000 C   0  0  0  0  0  0  0  0  0  0  0  0
    2.0303   -0.4898    0.0000 C   0  0  0  0  0  0  0  0  0  0  0  0
    2.3904    1.2044    0.0000 C   0  0  0  0  0  0  0  0  0  0  0  0
    3.3686    0.9965    0.0000 C   0  0  0  0  0  0  0  0  0  0  0  0
    4.0377    1.7396    0.0000 C   0  0  0  0  0  0  0  0  0  0  0  0
    5.0158    1.5317    0.0000 C   0  0  0  0  0  0  0  0  0  0  0  0
    5.9669    1.8407    0.0000 C   0  0  0  0  0  0  0  0  0  0  0  0
    5.2238    2.5098    0.0000 C   0  0  0  0  0  0  0  0  0  0  0  0
    5.3249    0.5806    0.0000 O   0  0  0  0  0  0  0  0  0  0  0  0
  1  2  2  0
  2  3  1  0
  3  4  1  0
  4  5  1  0
  5  6  1  0
  5  7  1  0
  7  8  1  0
  8  9  2  3
  8  2  1  0
  9 10  1  0
 10 11  2  3
 11 12  1  0
 12 13  1  0
 13 14  1  0
 14 15  1  0
 15 16  1  0
 15 17  1  0
 17 18  1  0
 17 11  1  0
 18 19  1  0
 19 20  1  0
 20 21  1  0
 20 15  1  0
 21 22  1  0
 21 23  1  0
 23 24  1  0
 24 25  1  0
 25 26  1  0
 26 27  1  0
 26 28  1  0
 26 29  1  0
M  END
>  <group_A>  (247) 
1

>  <group_B>  (247) 
0

>  <group_C>  (247) 
0

>  <group_D>  (247) 
0

>  <group_G>  (247) 
0

>  <group_H>  (247) 
0

>  <group_J>  (247) 
0

>  <group_L>  (247) 
0

>  <group_M>  (247) 
0

>  <group_N>  (247) 
0

>  <group_P>  (247) 
0

>  <group_R>  (247) 
0

>  <group_S>  (247) 
0

>  <group_V>  (247) 
0

$$$$

     RDKit          2D

  9  9  0  0  0  0  0  0  0  0999 V2000
   -0.8660   -1.5000    0.0000 N   0  0  0  0  0  0  0  0  0  0  0  0
   -0.0000   -1.0000    0.0000 C   0  0  0  0  0  0  0  0  0  0  0  0
    0.8660   -1.5000    0.0000 N   0  0  0  0  0  0  0  0  0  0  0  0
    0.0000    0.0000    0.0000 C   0  0  0  0  0  0  0  0  0  0  0  0
   -0.8660    0.5000    0.0000 C   0  0  0  0  0  0  0  0  0  0  0  0
   -0.8660    1.5000    0.0000 C   0  0  0  0  0  0  0  0  0  0  0  0
    0.0000    2.0000    0.0000 C   0  0  0  0  0  0  0  0  0  0  0  0
    0.8660    1.5000    0.0000 C   0  0  0  0  0  0  0  0  0  0  0  0
    0.8660    0.5000    0.0000 C   0  0  0  0  0  0  0  0  0  0  0  0
  1  2  2  0
  2  3  1  0
  2  4  1  0
  4  5  2  0
  5  6  1  0
  6  7  2  0
  7  8  1  0
  8  9  2  0
  9  4  1  0
M  END
>  <group_A>  (248) 
1

>  <group_B>  (248) 
1

>  <group_C>  (248) 
1

>  <group_D>  (248) 
1

>  <group_G>  (248) 
1

>  <group_H>  (248) 
0

>  <group_J>  (248) 
0

>  <group_L>  (248) 
0

>  <group_M>  (248) 
1

>  <group_N>  (248) 
0

>  <group_P>  (248) 
0

>  <group_R>  (248) 
0

>  <group_S>  (248) 
0

>  <group_V>  (248) 
1

$$$$

     RDKit          2D

  1  0  0  0  0  0  0  0  0  0999 V2000
    1.0000    0.0000    0.0000 I   0  0  0  0  0  0  0  0  0  0  0  0
M  CHG  1   1  -1
M  END
>  <group_A>  (249) 
1

>  <group_B>  (249) 
1

>  <group_C>  (249) 
1

>  <group_D>  (249) 
0

>  <group_G>  (249) 
1

>  <group_H>  (249) 
0

>  <group_J>  (249) 
1

>  <group_L>  (249) 
0

>  <group_M>  (249) 
1

>  <group_N>  (249) 
1

>  <group_P>  (249) 
0

>  <group_R>  (249) 
0

>  <group_S>  (249) 
1

>  <group_V>  (249) 
1

$$$$

     RDKit          2D

  8  8  0  0  0  0  0  0  0  0999 V2000
    0.5878   -0.8090    0.0000 N   0  0  0  0  0  0  0  0  0  0  0  0
   -0.0000   -0.0000    0.0000 C   0  0  0  0  0  0  0  0  0  0  0  0
   -1.0000   -0.0000    0.0000 C   0  0  0  0  0  0  0  0  0  0  0  0
   -1.3090    0.9511    0.0000 C   0  0  0  0  0  0  0  0  0  0  0  0
   -2.2601    1.2601    0.0000 O   0  0  0  0  0  0  0  0  0  0  0  0
   -0.5000    1.5388    0.0000 N   0  0  0  0  0  0  0  0  0  0  0  0
    0.3090    0.9511    0.0000 C   0  0  0  0  0  0  0  0  0  0  0  0
    1.2601    1.2601    0.0000 O   0  0  0  0  0  0  0  0  0  0  0  0
  1  2  1  0
  2  3  1  0
  3  4  1  0
  4  5  2  0
  4  6  1  0
  6  7  1  0
  7  8  2  0
  7  2  1  0
M  END
>  <group_A>  (250) 
1

>  <group_B>  (250) 
1

>  <group_C>  (250) 
1

>  <group_D>  (250) 
0

>  <group_G>  (250) 
1

>  <group_H>  (250) 
0

>  <group_J>  (250) 
0

>  <group_L>  (250) 
0

>  <group_M>  (250) 
0

>  <group_N>  (250) 
0

>  <group_P>  (250) 
0

>  <group_R>  (250) 
0

>  <group_S>  (250) 
0

>  <group_V>  (250) 
1

$$$$

     RDKit          2D

 31 33  0  0  0  0  0  0  0  0999 V2000
   -7.9690    2.1583    0.0000 N   0  0  0  0  0  0  0  0  0  0  0  0
   -7.3812    1.3493    0.0000 C   0  0  0  0  0  0  0  0  0  0  0  0
   -7.7880    0.4357    0.0000 N   0  0  0  0  0  0  0  0  0  0  0  0
   -7.2002   -0.3733    0.0000 C   0  0  0  0  0  0  0  0  0  0  0  0
   -6.2057   -0.2688    0.0000 N   0  0  0  0  0  0  0  0  0  0  0  0
   -5.7989    0.6448    0.0000 C   0  0  0  0  0  0  0  0  0  0  0  0
   -6.3867    1.4538    0.0000 C   0  0  0  0  0  0  0  0  0  0  0  0
   -5.7989    2.2628    0.0000 N   0  0  0  0  0  0  0  0  0  0  0  0
   -4.8479    1.9538    0.0000 C   0  0  0  0  0  0  0  0  0  0  0  0
   -4.8479    0.9538    0.0000 N   0  0  0  0  0  0  0  0  0  0  0  0
   -4.0388    0.3660    0.0000 C   0  0  0  0  0  0  0  0  0  0  0  0
   -3.0878    0.6750    0.0000 O   0  0  0  0  0  0  0  0  0  0  0  0
   -2.5000   -0.1340    0.0000 C   0  0  0  0  0  0  0  0  0  0  0  0
   -1.5000   -0.1340    0.0000 C   0  0  0  0  0  0  0  0  0  0  0  0
   -1.0000   -1.0000    0.0000 O   0  0  0  0  0  0  0  0  0  0  0  0
   -0.0000   -1.0000    0.0000 P   0  0  0  0  0  0  0  0  0  0  0  0
    0.0000   -2.0000    0.0000 O   0  0  0  0  0  0  0  0  0  0  0  0
    1.0000   -1.0000    0.0000 O   0  0  0  0  0  0  0  0  0  0  0  0
    0.0000    0.0000    0.0000 C   0  0  0  0  0  0  0  0  0  0  0  0
    0.8660    0.5000    0.0000 P   0  0  0  0  0  0  0  0  0  0  0  0
    1.3660   -0.3660    0.0000 O   0  0  0  0  0  0  0  0  0  0  0  0
    1.7321    1.0000    0.0000 O   0  0  0  0  0  0  0  0  0  0  0  0
[truncated: 2,523,115 more chars]
